# Supplementary material for: Interfacial degradation of silicon anodes in pouch cells
Source: Royal Society of Chemistry journal article supplement (doi:10.1039/d4ee01755b), 2024-01-01
Supplement: d4ee01755b2.xlsx [file d4ee01755b2.xlsx]

## Sheet: Fig 1a
Cycle Number	Coulombic Efficiency (%)	Cycle Number	Discharge Capacity (mAh)
1	96.428	1	427.78
2	99.532	2	425.75
3	100.012	3	426.97
4	99.908	4	426.78
5	100.111	5	427.88
6	99.955	6	427.97
7	99.804	7	427.28
8	99.851	8	426.89
9	100.066	9	427.65
10	99.777	10	426.96
11	100.484	11	429.73
12	99.863	12	429.29
13	99.841	13	428.99
14	99.905	14	428.57
15	99.838	15	427.84
16	100.102	16	428.72
17	100.081	17	429.35
18	100.219	18	430.82
19	99.954	19	430.83
20	100.023	20	431.24
21	99.807	21	430.42
22	99.803	22	429.55
23	100.073	23	430.02
24	100.172	24	431.29
25	100.361	25	433.43
26	99.945	26	433.63
27	99.827	27	432.77
28	99.846	28	432.07
29	99.977	29	432.23
30	100.053	30	432.56
31	100.178	31	433.61
32	100.005	32	434.07
33	99.969	33	434.07
34	99.859	34	433.55
35	99.755	35	432.3
36	99.867	36	431.75
37	100.03	37	431.79
38	100.063	38	432.53
39	99.962	39	432.49
40	99.936	40	432.28
41	99.882	41	431.85
42	100.116	42	432.47
43	99.859	43	432
44	99.977	44	431.64
45	99.792	45	430.71
46	99.938	46	430.33
47	99.881	47	429.84
48	99.974	48	430.1
49	99.869	49	429.29
50	100.068	50	429.72
51	100.022	51	429.1
52	100.001	52	429.28
53	100.017	53	430.02
54	100.002	54	430.23
55	100.039	55	430.57
56	99.982	56	430.66
57	99.927	57	430.4
58	99.954	58	430.27
59	100.016	59	430.5
60	99.945	60	430.32
61	99.994	61	430.06
62	99.965	62	430.41
63	99.914	63	430.2
64	100.032	64	430.05
65	99.9	65	429.84
66	100.07	66	430.25
67	99.975	67	430.21
68	100.082	68	430.75
69	100.059	69	431.02
70	100.227	70	432.79
71	100.075	71	433.22
72	99.967	72	433.32
73	99.886	73	432.68
74	100.162	74	433.71
75	100.003	75	434.03
76	100.019	76	434.19
77	99.883	77	433.8
78	99.999	78	433.76
79	99.925	79	433.48
80	99.559	80	430.98
81	100.03	81	430.93
82	99.948	82	431.04
83	100.01	83	431.22
84	100.036	84	431.44
85	99.886	85	430.87
86	99.978	86	430.7
87	100.051	87	431.12
88	99.988	88	430.99
89	100.123	89	431.98
90	99.973	90	432.05
91	99.931	91	431.68
92	99.971	92	431.6
93	99.994	93	431.59
94	99.984	94	431.6
95	99.821	95	430.67
96	99.931	96	430.29
97	99.959	97	430.08
98	100.114	98	430.81
99	100.021	99	431
100	99.947	100	430.87
101	99.835	101	429.45
102	99.954	102	429.47
103	100.09	103	430.38
104	100.055	104	430.63
105	99.939	105	430.29
106	99.964	106	430.18
107	99.972	107	430.33
108	99.889	108	429.79
109	100.085	109	430.36
110	99.999	110	430.36
111	99.902	111	429.94
112	100.046	112	430.46
113	99.897	113	429.87
114	99.841	114	429.2
115	100.074	115	429.32
116	100	116	429.59
117	100.008	117	429.68
118	100.026	118	430.09
119	99.795	119	429
120	100.041	120	429.13
121	100.107	121	429.72
122	99.813	122	429.14
123	99.919	123	428.37
124	99.991	124	428.47
125	99.967	125	428.38
126	100.039	126	428.58
127	99.964	127	428.86
128	99.989	128	428.74
129	99.929	129	428.33
130	99.982	130	428.28
131	99.937	131	428.04
132	99.98	132	427.81
133	100.081	133	428.77
134	99.936	134	428.25
135	100.075	135	428.6
136	99.861	136	428.3
137	100.061	137	428.54
138	99.961	138	428.24
139	100.068	139	428.99
140	99.942	140	428.67
141	100.028	141	428.9
142	99.968	142	428.87
143	99.877	143	428.37
144	99.982	144	428.23
145	100.125	145	428.98
146	99.932	146	428.77
147	99.969	147	428.68
148	99.899	148	428.23
149	99.925	149	427.86
150	100.065	150	428.28
151	100.336	151	430.77
152	99.725	152	429.52
153	100.026	153	429.62
154	99.78	154	428.13
155	100.178	155	429.4
156	99.934	156	429.85
157	99.691	157	427.89
158	99.853	158	427.13
159	99.864	159	426.33
160	100.036	160	426.62
161	100.118	161	427.68
162	100.005	162	428.04
163	99.712	163	426.31
164	99.975	164	426.2
165	99.968	165	426.04
166	99.981	166	426.05
167	100.002	167	426.46
168	100.067	168	426.3
169	99.981	169	426.91
170	99.839	170	425.89
171	99.957	171	425.88
172	99.983	172	425.84
173	100.007	173	426.04
174	100.119	174	426.86
175	99.904	175	426.39
176	99.905	176	426.18
177	99.89	177	425.41
178	100.035	178	425.8
179	99.943	179	425.63
180	100.024	180	425.44
181	99.876	181	425.18
182	99.937	182	424.74
183	99.963	183	424.63
184	99.993	184	424.56
185	100.042	185	425.07
186	99.718	186	423.4
187	99.964	187	423.07
188	99.998	188	423.06
189	100.012	189	423.35
190	99.976	190	423.26
191	100.119	191	424.21
192	99.991	192	424.24
193	99.972	193	424.42
194	99.951	194	424.33
195	99.924	195	423.99
196	99.291	196	424.07
197	99.905	197	424.08
198	99.915	198	423.91
199	99.897	199	423.26
200	99.779	200	421.95
201	100.372	201	423.97
202	99.948	202	424.35
203	99.806	203	423.39
204	99.873	204	422.69
205	99.991	205	422.66
206	100.177	206	423.81
207	99.982	207	423.99
208	100.048	208	424.46
209	99.825	209	423.71
210	99.937	210	423.25
211	99.91	211	422.69
212	99.969	212	422.38
213	100.111	213	423.28
214	99.988	214	423.49
215	99.818	215	422.53
216	99.962	216	422.27
217	99.946	217	421.96
218	100.02	218	422.18
219	100.005	219	422.49
220	100.062	220	422.83
221	99.968	221	423.13
222	99.745	222	421.43
223	99.871	223	420.71
224	100.025	224	420.66
225	99.83	225	420.19
226	99.984	226	419.77
227	99.945	227	419.48
228	100.022	228	419.56
229	99.961	229	419.6
230	100.002	230	419.23
231	100.12	231	420.88
232	99.936	232	420.33
233	99.913	233	419.73
234	99.739	234	418.74
235	99.904	235	417.59
236	100.1	236	417.94
237	100.137	237	419.41
238	100.3	238	421.5
239	99.736	239	419.9
240	99.701	240	418.23
241	99.891	241	417.46
242	100.151	242	418.31
243	100.245	243	420.27
244	100.17	244	421.14
245	99.705	245	419.96
246	99.906	246	419.5
247	99.859	247	418.6
248	100.001	248	418.56
249	100.123	249	419
250	99.908	250	419.18
251	99.957	251	417.99
252	99.86	252	417.62
253	99.978	253	417.55
254	100.169	254	418.95
255	100.035	255	419.64
256	99.918	256	419.26
257	99.783	257	418.1
258	99.86	258	417.14
259	99.994	259	417.1
260	100.123	260	418.1
261	99.995	261	418.51
262	99.88	262	417.75
263	99.811	263	416.69
264	99.86	264	415.77
265	99.974	265	415.59
266	100.067	266	416.21
267	100.119	267	416.95
268	99.749	268	415.86
269	99.874	269	415.11
270	99.844	270	413.88
271	99.95	271	413.68
272	100.19	272	415.17
273	100.158	273	416.78
274	99.992	274	416.62
275	99.826	275	415.68
276	99.945	276	415.54
277	99.979	277	415.53
278	99.81	278	414.56
279	99.857	279	413.35
280	100.041	280	414.4
281	99.913	281	413.27
282	99.92	282	412.87
283	99.955	283	412.66
284	100.056	284	413.03
285	100.031	285	413.91
286	100.01	286	413.73
287	99.837	287	412.97
288	99.876	288	412.12
289	99.891	289	411.46
290	100.028	290	411.56
291	100.098	291	412.5
292	100.059	292	413.5
293	99.822	293	412.13
294	99.88	294	411.7
295	99.92	295	410.83
296	100.009	296	411.13
297	100.088	297	411.94
298	99.933	298	411.77
299	100.017	299	411.93
300	99.832	300	411.39

## Sheet: Fig 1b
2nd cycle				5th cycle				10th cycle				100th cycle				200th cycle				300th cycle
Charging Capacity (mAh)	Voltage (V)	Discharging Capacity (mAh)	Voltage (V)	Charging Capacity (mAh)	Voltage (V)	Discharging Capacity (mAh)	Voltage (V)	Charging Capacity (mAh)	Voltage (V)	Discharging Capacity (mAh)	Voltage (V)	Charging Capacity (mAh)	Voltage (V)	Discharging Capacity (mAh)	Voltage (V)	Charging Capacity (mAh)	Voltage (V)	Discharging Capacity (mAh)	Voltage (V)	Charging Capacity (mAh)	Voltage (V)	Discharging Capacity (mAh)	Voltage (V)
0	3.5155	0	4.3378	0	3.511	0	4.3422	0	3.5026	0	4.3388	0	3.4275	0	4.332	0	3.4837	0	4.2713	0	3.3421	0	4.3175
0.19	3.5155	0.09	4.3378	0.19	3.511	0.09	4.3422	0.19	3.5026	0.09	4.3388	0.19	3.4275	0.09	4.332	0.19	3.4837	0.09	4.2713	0.19	3.3421	0.09	4.3175
0.37	3.5371	0.17	4.333	0.37	3.5326	0.17	4.3375	0.37	3.5237	0.17	4.3341	0.38	3.4438	0.17	4.327	0.38	3.5021	0.17	4.2661	0.38	3.3636	0.18	4.3121
0.56	3.5526	0.26	4.3291	0.56	3.5478	0.26	4.3338	0.56	3.5386	0.26	4.3304	0.56	3.455	0.26	4.3226	0.56	3.5145	0.26	4.2621	0.56	3.3784	0.26	4.3079
0.75	3.5657	0.35	4.3254	0.75	3.5607	0.35	4.3302	0.75	3.5512	0.35	4.3268	0.75	3.4648	0.35	4.3188	0.75	3.5249	0.35	4.2582	0.75	3.3909	0.35	4.3041
0.94	3.5768	0.44	4.3218	0.94	3.5715	0.44	4.3268	0.94	3.5618	0.44	4.3234	0.94	3.4734	0.44	4.315	0.94	3.5341	0.44	4.2545	0.94	3.4014	0.44	4.3007
1.12	3.5868	0.52	4.3188	1.12	3.5812	0.52	4.3238	1.12	3.5712	0.52	4.3204	1.12	3.4811	0.52	4.3118	1.13	3.5423	0.52	4.2511	1.13	3.4111	0.53	4.2975
1.31	3.5956	0.61	4.3155	1.31	3.5901	0.61	4.3207	1.31	3.5799	0.61	4.3175	1.31	3.4882	0.61	4.3084	1.31	3.5499	0.61	4.2479	1.31	3.4198	0.61	4.2942
1.5	3.6036	0.7	4.3126	1.5	3.598	0.7	4.3178	1.5	3.5877	0.7	4.3146	1.5	3.4947	0.7	4.3052	1.5	3.5567	0.7	4.2448	1.5	3.4279	0.7	4.2912
1.69	3.6111	0.79	4.3097	1.69	3.6054	0.79	4.315	1.69	3.5949	0.79	4.3117	1.69	3.5008	0.79	4.3021	1.69	3.5633	0.79	4.2419	1.69	3.4351	0.79	4.2881
1.87	3.618	0.87	4.307	1.87	3.612	0.87	4.3125	1.87	3.6015	0.87	4.3091	1.87	3.5066	0.87	4.2992	1.87	3.5694	0.87	4.2389	1.88	3.4421	0.88	4.2854
2.06	3.6245	0.96	4.3042	2.06	3.6186	0.96	4.3097	2.06	3.6077	0.96	4.3065	2.06	3.5118	0.96	4.2963	2.06	3.5751	0.96	4.236	2.06	3.4485	0.96	4.2824
2.25	3.6304	1.05	4.3017	2.25	3.6245	1.05	4.3073	2.25	3.6135	1.05	4.3039	2.25	3.517	1.05	4.2934	2.25	3.5804	1.05	4.2332	2.25	3.4545	1.05	4.2797
2.44	3.6361	1.14	4.2991	2.44	3.6301	1.14	4.3047	2.44	3.6191	1.14	4.3015	2.44	3.5218	1.14	4.2907	2.44	3.5856	1.14	4.2305	2.44	3.4601	1.14	4.2771
2.62	3.6414	1.22	4.2967	2.62	3.6353	1.22	4.3025	2.62	3.6241	1.22	4.2991	2.62	3.5263	1.22	4.2879	2.63	3.5904	1.22	4.2279	2.63	3.4655	1.23	4.2744
2.81	3.6464	1.31	4.2942	2.81	3.6403	1.31	4.3	2.81	3.6291	1.31	4.2967	2.81	3.5307	1.31	4.2854	2.81	3.5949	1.31	4.2253	2.81	3.4705	1.31	4.272
3	3.6511	1.4	4.2918	3	3.645	1.4	4.2978	3	3.6338	1.4	4.2944	3	3.5347	1.4	4.2826	3	3.5994	1.4	4.2227	3	3.4755	1.4	4.2694
3.19	3.6558	1.49	4.2895	3.19	3.6493	1.49	4.2955	3.19	3.6382	1.49	4.2921	3.19	3.5387	1.49	4.2802	3.19	3.6035	1.49	4.2202	3.19	3.48	1.49	4.267
3.37	3.66	1.57	4.2873	3.37	3.6537	1.57	4.2934	3.37	3.6424	1.57	4.2899	3.37	3.5426	1.57	4.2776	3.37	3.6075	1.57	4.2177	3.38	3.4843	1.58	4.2645
3.56	3.6643	1.66	4.2852	3.56	3.6579	1.66	4.2913	3.56	3.6464	1.66	4.2878	3.56	3.5462	1.66	4.2753	3.56	3.6115	1.66	4.2153	3.56	3.4885	1.66	4.2623
3.75	3.6682	1.75	4.2829	3.75	3.6617	1.75	4.2892	3.75	3.6503	1.75	4.2857	3.75	3.5496	1.75	4.2729	3.75	3.6153	1.75	4.2131	3.75	3.4927	1.75	4.26
3.94	3.6719	1.84	4.2808	3.94	3.6655	1.84	4.2871	3.94	3.654	1.84	4.2837	3.94	3.5529	1.84	4.2705	3.94	3.6188	1.84	4.2106	3.94	3.4965	1.84	4.2578
4.12	3.6756	1.92	4.2789	4.12	3.6692	1.92	4.2852	4.12	3.6577	1.92	4.2816	4.12	3.5562	1.92	4.2682	4.12	3.6222	1.93	4.2085	4.13	3.5003	1.93	4.2555
4.31	3.679	2.01	4.2768	4.31	3.6726	2.01	4.2833	4.31	3.6611	2.01	4.2797	4.31	3.5594	2.01	4.266	4.31	3.6256	2.01	4.2063	4.31	3.5039	2.01	4.2534
4.5	3.6824	2.1	4.2749	4.5	3.6761	2.1	4.2813	4.5	3.6643	2.1	4.2778	4.5	3.5623	2.1	4.2637	4.5	3.6288	2.1	4.204	4.5	3.5074	2.1	4.2513
4.69	3.6858	2.19	4.2729	4.69	3.6793	2.19	4.2794	4.69	3.6676	2.19	4.276	4.69	3.5652	2.19	4.2616	4.69	3.6319	2.19	4.2019	4.69	3.5107	2.19	4.2492
4.87	3.6889	2.27	4.271	4.87	3.6826	2.27	4.2776	4.87	3.6708	2.27	4.2741	4.87	3.568	2.27	4.2595	4.87	3.6349	2.27	4.1998	4.88	3.5139	2.28	4.2471
5.06	3.6919	2.36	4.2692	5.06	3.6855	2.36	4.2758	5.06	3.6737	2.36	4.2723	5.06	3.5707	2.36	4.2574	5.06	3.6379	2.36	4.1977	5.06	3.517	2.36	4.2452
5.25	3.695	2.45	4.2673	5.25	3.6884	2.45	4.2741	5.25	3.6768	2.45	4.2703	5.25	3.5733	2.45	4.2553	5.25	3.6406	2.45	4.1958	5.25	3.52	2.45	4.2432
5.44	3.6977	2.54	4.2655	5.44	3.6913	2.54	4.2723	5.44	3.6797	2.54	4.2687	5.44	3.5759	2.54	4.2534	5.44	3.6433	2.54	4.1938	5.44	3.5229	2.54	4.2413
5.62	3.7005	2.62	4.2639	5.62	3.694	2.62	4.2707	5.62	3.6822	2.62	4.267	5.62	3.5783	2.62	4.2515	5.62	3.6461	2.62	4.1917	5.63	3.5257	2.63	4.2394
5.81	3.7032	2.71	4.2621	5.81	3.6968	2.71	4.2689	5.81	3.685	2.71	4.2652	5.81	3.5809	2.71	4.2495	5.81	3.6485	2.71	4.19	5.81	3.5286	2.71	4.2376
6	3.706	2.8	4.2605	6	3.6994	2.8	4.2673	6	3.6876	2.8	4.2636	6	3.5831	2.8	4.2476	6	3.6511	2.8	4.1882	6	3.5313	2.8	4.2358
6.19	3.7086	2.89	4.2587	6.19	3.7019	2.89	4.2657	6.19	3.6902	2.89	4.262	6.19	3.5852	2.89	4.2458	6.19	3.6535	2.89	4.1863	6.19	3.5339	2.89	4.234
6.37	3.711	2.97	4.2571	6.37	3.7045	2.97	4.2641	6.37	3.6927	2.97	4.2603	6.37	3.5875	2.97	4.2439	6.37	3.6558	2.97	4.1845	6.38	3.5363	2.98	4.2323
6.56	3.7134	3.06	4.2555	6.56	3.7069	3.06	4.2626	6.56	3.6952	3.06	4.2587	6.56	3.5898	3.06	4.2421	6.56	3.6582	3.06	4.1827	6.56	3.5387	3.06	4.2305
6.75	3.7158	3.15	4.254	6.75	3.7094	3.15	4.261	6.75	3.6974	3.15	4.2573	6.75	3.5918	3.15	4.2403	6.75	3.6605	3.15	4.1809	6.75	3.5412	3.15	4.2289
6.94	3.7182	3.24	4.2524	6.94	3.7118	3.24	4.2595	6.94	3.6998	3.24	4.2557	6.94	3.5938	3.24	4.2387	6.94	3.6627	3.24	4.1792	6.94	3.5436	3.24	4.2271
7.12	3.7205	3.32	4.251	7.12	3.714	3.32	4.2579	7.12	3.7021	3.32	4.254	7.12	3.5957	3.32	4.2369	7.12	3.6648	3.32	4.1775	7.13	3.5458	3.33	4.2255
7.31	3.7228	3.41	4.2494	7.31	3.7163	3.41	4.2565	7.31	3.7044	3.41	4.2526	7.31	3.5978	3.41	4.2353	7.31	3.6669	3.41	4.1759	7.31	3.5481	3.41	4.2239
7.5	3.7249	3.5	4.2479	7.5	3.7184	3.5	4.255	7.5	3.7065	3.5	4.2511	7.5	3.5996	3.5	4.2335	7.5	3.669	3.5	4.1743	7.5	3.5502	3.5	4.2223
7.69	3.7271	3.59	4.2465	7.69	3.7205	3.59	4.2537	7.69	3.7087	3.59	4.2497	7.69	3.6015	3.59	4.2319	7.69	3.6711	3.59	4.1725	7.69	3.5523	3.59	4.2208
7.87	3.7292	3.67	4.245	7.87	3.7226	3.67	4.2523	7.87	3.7108	3.67	4.2484	7.87	3.6033	3.67	4.2305	7.87	3.673	3.67	4.1711	7.88	3.5544	3.68	4.2192
8.06	3.7312	3.76	4.2437	8.06	3.7247	3.76	4.251	8.06	3.7129	3.76	4.2469	8.06	3.6051	3.76	4.2289	8.06	3.675	3.76	4.1695	8.06	3.5563	3.76	4.2177
8.25	3.7332	3.85	4.2423	8.25	3.7268	3.85	4.2495	8.25	3.7148	3.85	4.2455	8.25	3.6069	3.85	4.2273	8.25	3.6769	3.85	4.168	8.25	3.5584	3.85	4.2163
8.44	3.7352	3.94	4.241	8.44	3.7287	3.94	4.2482	8.44	3.7169	3.94	4.2442	8.44	3.6085	3.94	4.2258	8.44	3.6787	3.94	4.1664	8.44	3.5604	3.94	4.2148
8.62	3.7373	4.02	4.2395	8.62	3.7308	4.02	4.2469	8.62	3.7189	4.02	4.2427	8.62	3.6103	4.02	4.2242	8.62	3.6805	4.02	4.165	8.63	3.5623	4.03	4.2134
8.81	3.7391	4.11	4.2382	8.81	3.7326	4.11	4.2457	8.81	3.7208	4.11	4.2416	8.81	3.6119	4.11	4.2227	8.81	3.6824	4.11	4.1635	8.81	3.5641	4.11	4.2121
9	3.741	4.2	4.2369	9	3.7345	4.2	4.2444	9	3.7228	4.2	4.2403	9	3.6135	4.2	4.2213	9	3.684	4.2	4.1621	9	3.5659	4.2	4.2106
9.19	3.7429	4.29	4.2356	9.19	3.7365	4.29	4.2431	9.19	3.7245	4.29	4.239	9.19	3.6151	4.29	4.2198	9.19	3.6858	4.29	4.1606	9.19	3.5676	4.29	4.2093
9.37	3.7447	4.37	4.2344	9.37	3.7384	4.37	4.2418	9.37	3.7265	4.37	4.2377	9.37	3.6167	4.37	4.2185	9.37	3.6874	4.37	4.1593	9.38	3.5694	4.38	4.2079
9.56	3.7465	4.46	4.2331	9.56	3.74	4.46	4.2406	9.56	3.7282	4.46	4.2365	9.56	3.6182	4.46	4.2171	9.56	3.689	4.46	4.1579	9.56	3.5712	4.46	4.2066
9.75	3.7484	4.55	4.2319	9.75	3.742	4.55	4.2394	9.75	3.7302	4.55	4.2352	9.75	3.6198	4.55	4.2158	9.75	3.6908	4.55	4.1566	9.75	3.5728	4.55	4.2053
9.94	3.75	4.64	4.2306	9.94	3.7437	4.64	4.2382	9.94	3.7318	4.64	4.234	9.94	3.6212	4.64	4.2143	9.94	3.6922	4.64	4.1551	9.94	3.5746	4.64	4.204
10.12	3.7518	4.72	4.2295	10.12	3.7455	4.72	4.2369	10.12	3.7336	4.72	4.2327	10.12	3.6227	4.72	4.2131	10.12	3.6939	4.72	4.1538	10.13	3.5762	4.73	4.2027
10.31	3.7536	4.81	4.2282	10.31	3.7471	4.81	4.2358	10.31	3.7353	4.81	4.2316	10.31	3.6241	4.81	4.2118	10.31	3.6955	4.81	4.1525	10.31	3.5778	4.81	4.2014
10.5	3.7554	4.9	4.2271	10.5	3.7489	4.9	4.2347	10.5	3.7371	4.9	4.2305	10.5	3.6256	4.9	4.2105	10.5	3.6969	4.9	4.1512	10.5	3.5794	4.9	4.2003
10.69	3.757	4.99	4.226	10.69	3.7505	4.99	4.2335	10.69	3.7387	4.99	4.2294	10.69	3.627	4.99	4.2092	10.69	3.6984	4.99	4.15	10.69	3.581	4.99	4.199
10.87	3.7586	5.07	4.2248	10.87	3.7521	5.07	4.2324	10.87	3.7404	5.07	4.2282	10.87	3.6285	5.07	4.2079	10.87	3.7	5.07	4.1487	10.88	3.5825	5.08	4.1979
11.06	3.7602	5.16	4.2237	11.06	3.7539	5.16	4.2313	11.06	3.7421	5.16	4.2271	11.06	3.6298	5.16	4.2068	11.06	3.7015	5.16	4.1475	11.06	3.5841	5.16	4.1966
11.25	3.7618	5.25	4.2226	11.25	3.7555	5.25	4.2302	11.25	3.7437	5.25	4.226	11.25	3.6312	5.25	4.2055	11.25	3.7029	5.25	4.1462	11.25	3.5856	5.25	4.1955
11.44	3.7634	5.34	4.2214	11.44	3.7571	5.34	4.229	11.44	3.7454	5.34	4.2248	11.44	3.6327	5.34	4.2043	11.44	3.7042	5.34	4.1451	11.44	3.587	5.34	4.1943
11.62	3.765	5.42	4.2203	11.62	3.7588	5.51	4.2269	11.62	3.7468	5.42	4.2237	11.62	3.634	5.42	4.203	11.62	3.7056	5.42	4.1438	11.63	3.5885	5.43	4.1932
11.81	3.7667	5.51	4.2192	11.81	3.7602	5.69	4.2248	11.81	3.7486	5.51	4.2226	11.81	3.6353	5.51	4.2019	11.81	3.7071	5.51	4.1428	11.81	3.5899	5.51	4.1921
12	3.7681	5.6	4.2182	12	3.7618	5.86	4.2229	12	3.75	5.6	4.2216	12	3.6366	5.6	4.2006	12	3.7084	5.6	4.1416	12	3.5914	5.6	4.1909
12.19	3.7697	5.69	4.2171	12.19	3.7634	5.95	4.2218	12.19	3.7517	5.69	4.2206	12.19	3.6379	5.69	4.1995	12.19	3.7097	5.69	4.1404	12.19	3.5927	5.69	4.1898
12.37	3.7712	5.77	4.2161	12.37	3.7649	6.04	4.2208	12.37	3.7531	5.77	4.2195	12.37	3.6391	5.77	4.1984	12.37	3.7111	5.77	4.1393	12.38	3.5941	5.78	4.1887
12.56	3.7726	5.86	4.2151	12.56	3.7663	6.12	4.2198	12.56	3.7547	5.86	4.2185	12.56	3.6404	5.86	4.1972	12.56	3.7124	5.86	4.1382	12.56	3.5954	5.86	4.1877
12.75	3.7742	5.95	4.214	12.75	3.7678	6.3	4.2179	12.75	3.7562	5.95	4.2174	12.75	3.6417	5.95	4.1961	12.75	3.7139	5.95	4.1372	12.75	3.5967	5.95	4.1866
12.94	3.7757	6.04	4.2129	12.94	3.7694	6.39	4.2169	12.94	3.7578	6.04	4.2164	12.94	3.643	6.04	4.195	12.94	3.715	6.04	4.1361	12.94	3.5981	6.04	4.1856
13.12	3.777	6.12	4.2119	13.12	3.7709	6.56	4.215	13.12	3.7592	6.12	4.2155	13.12	3.6443	6.12	4.194	13.12	3.7163	6.12	4.1349	13.13	3.5994	6.13	4.1845
13.31	3.7784	6.3	4.21	13.31	3.7722	6.74	4.2132	13.31	3.7605	6.21	4.2145	13.31	3.6454	6.21	4.1929	13.31	3.7176	6.21	4.1338	13.31	3.6007	6.21	4.1835
13.5	3.7799	6.39	4.209	13.5	3.7736	6.82	4.2122	13.5	3.762	6.3	4.2134	13.5	3.6467	6.3	4.1917	13.5	3.7189	6.3	4.1328	13.5	3.602	6.3	4.1825
13.69	3.7814	6.47	4.208	13.69	3.7751	7	4.2105	13.69	3.7634	6.39	4.2124	13.69	3.6479	6.47	4.1897	13.69	3.7203	6.39	4.1317	13.69	3.6033	6.48	4.1805
13.87	3.7828	6.56	4.2071	13.87	3.7765	7.17	4.2087	13.87	3.7649	6.56	4.2106	13.87	3.6492	6.56	4.1887	13.87	3.7216	6.47	4.1307	13.88	3.6044	6.56	4.1795
14.06	3.7841	6.65	4.2061	14.06	3.778	7.35	4.2069	14.06	3.7663	6.74	4.2087	14.06	3.6504	6.65	4.1876	14.06	3.7228	6.56	4.1298	14.06	3.6057	6.65	4.1785
14.25	3.7854	6.74	4.2051	14.25	3.7793	7.44	4.2061	14.25	3.7678	6.82	4.2077	14.25	3.6516	6.74	4.1866	14.25	3.724	6.65	4.1288	14.25	3.607	6.74	4.1775
14.44	3.7868	6.91	4.2034	14.44	3.7805	7.61	4.2043	14.44	3.7691	7	4.206	14.44	3.6527	6.82	4.1855	14.44	3.7253	6.74	4.1277	14.44	3.6082	6.91	4.1758
14.62	3.7881	7	4.2024	14.62	3.782	7.79	4.2027	14.62	3.7705	7.17	4.204	14.62	3.654	6.91	4.1845	14.62	3.7265	6.82	4.1267	14.63	3.6094	7	4.1748
14.81	3.7896	7.09	4.2014	14.81	3.7833	7.87	4.2019	14.81	3.7718	7.35	4.2024	14.81	3.6551	7	4.1835	14.81	3.7276	6.91	4.1257	14.81	3.6107	7.09	4.1738
15	3.7909	7.26	4.1997	15	3.7847	7.96	4.2009	15	3.7733	7.44	4.2014	15	3.6563	7.09	4.1825	15	3.7289	7	4.1246	15	3.6117	7.26	4.1721
15.19	3.7922	7.35	4.1987	15.19	3.786	8.14	4.1995	15.19	3.7746	7.61	4.1998	15.19	3.6575	7.26	4.1806	15.19	3.7302	7.17	4.1228	15.19	3.613	7.35	4.1711
15.37	3.7935	7.44	4.1979	15.37	3.7873	8.31	4.1979	15.37	3.7759	7.79	4.198	15.37	3.6587	7.44	4.1788	15.37	3.7313	7.35	4.1209	15.38	3.6141	7.44	4.1701
15.56	3.7947	7.61	4.1961	15.56	3.7886	8.49	4.1963	15.56	3.7772	7.87	4.1972	15.56	3.6598	7.61	4.1769	15.56	3.7324	7.44	4.1201	15.56	3.6153	7.61	4.1685
15.75	3.796	7.79	4.1943	15.75	3.7899	8.66	4.1947	15.75	3.7784	8.05	4.1956	15.75	3.6609	7.79	4.1751	15.75	3.7336	7.52	4.1191	15.75	3.6165	7.7	4.1675
15.94	3.7973	7.87	4.1935	15.94	3.7912	8.75	4.1938	15.94	3.7797	8.22	4.194	15.94	3.6621	7.87	4.1742	15.94	3.7347	7.7	4.1173	15.94	3.6175	7.88	4.1658
16.12	3.7985	8.05	4.1919	16.12	3.7925	8.92	4.1924	16.12	3.7812	8.31	4.193	16.12	3.6632	8.05	4.1724	16.12	3.7358	7.87	4.1154	16.13	3.6186	8.05	4.1642
16.31	3.7999	8.22	4.1903	16.31	3.7938	9.1	4.1908	16.31	3.7825	8.49	4.1914	16.31	3.6643	8.14	4.1714	16.31	3.737	8.05	4.1136	16.31	3.6199	8.23	4.1624
16.5	3.801	8.31	4.1893	16.5	3.7949	9.19	4.19	16.5	3.7836	8.66	4.1898	16.5	3.6655	8.31	4.1696	16.5	3.7381	8.22	4.112	16.5	3.6209	8.31	4.1616
16.69	3.8023	8.49	4.1877	16.69	3.7962	9.36	4.1885	16.69	3.7849	8.75	4.1892	16.69	3.6666	8.49	4.168	16.69	3.7392	8.31	4.1111	16.69	3.622	8.49	4.16
16.87	3.8035	8.66	4.1861	16.87	3.7973	9.54	4.1871	16.87	3.7862	8.92	4.1876	16.87	3.6677	8.66	4.1662	16.87	3.7404	8.49	4.1094	16.88	3.6232	8.66	4.1583
17.06	3.8048	8.75	4.1853	17.06	3.7986	9.62	4.1863	17.06	3.7873	9.1	4.1859	17.06	3.6688	8.75	4.1654	17.06	3.7415	8.66	4.1078	17.06	3.6243	8.75	4.1575
17.25	3.8059	8.92	4.1837	17.25	3.7999	9.8	4.1848	17.25	3.7886	9.19	4.1853	17.25	3.67	8.92	4.1638	17.25	3.7426	8.75	4.1069	17.25	3.6254	8.93	4.1559
17.44	3.8072	9.1	4.1822	17.44	3.801	9.97	4.1834	17.43	3.7899	9.36	4.1837	17.62	3.6721	9.1	4.1622	17.44	3.7437	8.92	4.1052	17.44	3.6264	9.1	4.1543
17.62	3.8083	9.19	4.1814	17.62	3.8023	10.06	4.1827	17.62	3.791	9.54	4.1822	17.81	3.6732	9.19	4.1612	17.62	3.7449	9.1	4.1036	17.63	3.6275	9.19	4.1537
17.81	3.8094	9.36	4.18	17.81	3.8035	10.24	4.1813	17.81	3.7923	9.62	4.1816	18	3.6743	9.36	4.1596	17.81	3.7458	9.19	4.1028	17.81	3.6287	9.36	4.152
18	3.8107	9.54	4.1784	18	3.8046	10.41	4.1798	18	3.7935	9.8	4.18	18.19	3.6753	9.54	4.158	18	3.747	9.36	4.1012	18.19	3.6308	9.54	4.1506
18.19	3.8117	9.62	4.1775	18.19	3.8057	10.5	4.1793	18.18	3.7947	9.97	4.1787	18.37	3.6764	9.62	4.1572	18.37	3.7491	9.54	4.0998	18.56	3.6328	9.63	4.1498
18.37	3.813	9.8	4.1761	18.37	3.807	10.67	4.1779	18.37	3.7959	10.06	4.1779	18.56	3.6774	9.8	4.1558	18.56	3.7502	9.62	4.099	18.75	3.6338	9.8	4.1483
18.56	3.814	9.97	4.1746	18.56	3.8081	10.85	4.1764	18.56	3.797	10.24	4.1764	18.75	3.6785	9.97	4.1541	18.75	3.7512	9.8	4.0973	18.94	3.6348	9.98	4.1467
18.75	3.8152	10.06	4.1738	18.75	3.8093	10.94	4.1758	18.75	3.7981	10.41	4.1751	18.94	3.6797	10.06	4.1533	18.94	3.7523	9.97	4.0959	19.13	3.6359	10.06	4.1461
18.94	3.8164	10.24	4.1725	18.93	3.8104	11.11	4.1745	18.93	3.7994	10.5	4.1743	19.12	3.6808	10.24	4.1517	19.12	3.7533	10.06	4.0951	19.31	3.6369	10.24	4.1446
19.12	3.8175	10.41	4.1709	19.12	3.8115	11.29	4.173	19.12	3.8006	10.67	4.1729	19.31	3.6818	10.41	4.1503	19.31	3.7544	10.24	4.0936	19.5	3.638	10.41	4.1432
19.31	3.8185	10.5	4.1703	19.31	3.8127	11.37	4.1724	19.31	3.8017	10.85	4.1716	19.5	3.6829	10.5	4.1496	19.5	3.7554	10.41	4.092	19.69	3.639	10.5	4.1425
19.5	3.8196	10.67	4.1688	19.5	3.8138	11.55	4.1711	19.5	3.8028	10.94	4.1709	19.69	3.6839	10.67	4.148	19.69	3.7563	10.5	4.0914	19.88	3.64	10.68	4.1411
19.69	3.8207	10.85	4.1674	19.68	3.8148	11.72	4.1698	19.68	3.8039	11.11	4.1695	19.87	3.685	10.85	4.1466	19.87	3.7573	10.67	4.0899	20.25	3.6419	10.85	4.1396
19.87	3.8219	10.94	4.1667	19.87	3.8159	11.81	4.1692	19.87	3.8051	11.29	4.1682	20.06	3.686	10.94	4.1458	20.06	3.7584	10.85	4.0885	20.44	3.6429	10.94	4.139
20.25	3.824	11.11	4.1653	20.06	3.817	11.99	4.1679	20.06	3.8062	11.37	4.1675	20.25	3.6871	11.11	4.1443	20.25	3.7596	10.94	4.0878	20.63	3.644	11.11	4.1375
20.62	3.8261	11.29	4.164	20.25	3.8182	12.16	4.1664	20.25	3.8072	11.55	4.1662	20.44	3.6881	11.29	4.1428	20.62	3.7615	11.11	4.0864	20.82	3.645	11.29	4.1362
21	3.8282	11.37	4.1632	20.62	3.8203	12.25	4.1658	20.43	3.8083	11.72	4.1648	20.62	3.689	11.37	4.1422	20.81	3.7625	11.29	4.0849	21.19	3.6469	11.38	4.1356
21.18	3.8293	11.55	4.1619	21	3.8224	12.42	4.1646	20.62	3.8094	11.81	4.1642	20.81	3.6902	11.55	4.1408	21	3.7636	11.37	4.0841	21.38	3.6479	11.55	4.1341
21.56	3.8312	11.72	4.1606	21.37	3.8244	12.6	4.1633	20.81	3.8104	11.99	4.1629	21	3.6913	11.72	4.1393	21.37	3.7655	11.55	4.0828	21.57	3.6488	11.73	4.1328
21.75	3.8322	11.81	4.1598	21.56	3.8254	12.69	4.1627	21	3.8115	12.16	4.1616	21.37	3.6932	11.81	4.1387	21.56	3.7665	11.72	4.0815	21.75	3.6498	11.81	4.1322
21.93	3.8332	11.99	4.1585	21.75	3.8264	12.86	4.1614	21.18	3.8127	12.25	4.1609	21.56	3.6942	11.99	4.1372	21.75	3.7675	11.81	4.0807	21.94	3.6508	11.99	4.1309
22.31	3.8351	12.16	4.1572	21.93	3.8275	13.04	4.1601	21.56	3.8148	12.42	4.1596	21.75	3.6953	12.16	4.1359	22.12	3.7694	11.99	4.0794	22.32	3.6527	12.16	4.1296
22.5	3.8361	12.25	4.1566	22.12	3.8285	13.12	4.1596	21.93	3.8167	12.6	4.1583	21.94	3.6963	12.25	4.1351	22.31	3.7704	12.16	4.078	22.5	3.6537	12.25	4.1288
22.87	3.8382	12.42	4.1553	22.31	3.8295	13.3	4.1583	22.12	3.8178	12.69	4.1577	22.12	3.6973	12.42	4.1338	22.5	3.7713	12.25	4.0773	22.88	3.6556	12.43	4.1275
23.25	3.8399	12.6	4.1538	22.5	3.8304	13.47	4.1571	22.31	3.8188	12.86	4.1564	22.5	3.6994	12.6	4.1325	22.69	3.7723	12.42	4.076	23.25	3.6574	12.6	4.1262
23.43	3.8409	12.69	4.1533	22.68	3.8314	13.56	4.1566	22.5	3.8198	13.04	4.1553	22.87	3.7013	12.69	4.1317	22.87	3.7733	12.6	4.0746	23.44	3.6584	12.69	4.1257
23.62	3.8419	12.86	4.152	22.87	3.8324	13.74	4.1553	22.68	3.8209	13.12	4.1546	23.06	3.7024	12.86	4.1304	23.25	3.7752	12.69	4.0739	23.82	3.6603	12.86	4.1245
23.81	3.8429	13.04	4.1508	23.25	3.8343	13.91	4.154	22.87	3.8219	13.3	4.1533	23.44	3.7044	13.04	4.1291	23.44	3.7762	12.86	4.0726	24	3.6613	13.04	4.123
24.18	3.8446	13.12	4.1501	23.43	3.8353	14	4.1535	23.25	3.8238	13.47	4.152	23.81	3.7063	13.12	4.1285	23.62	3.7772	13.04	4.0714	24.38	3.663	13.13	4.1225
24.37	3.8456	13.3	4.1488	23.81	3.8372	14.17	4.1522	23.43	3.8248	13.56	4.1516	24	3.7073	13.3	4.127	24	3.7791	13.12	4.0707	24.57	3.664	13.3	4.1212
24.75	3.8474	13.47	4.1475	24.18	3.839	14.35	4.1511	23.62	3.8259	13.74	4.1503	24.37	3.7094	13.47	4.1257	24.19	3.7801	13.3	4.0694	24.75	3.665	13.48	4.1201
25.12	3.8491	13.56	4.1469	24.37	3.8399	14.44	4.1506	24	3.8277	13.91	4.149	24.75	3.7113	13.56	4.1251	24.37	3.781	13.47	4.0681	25.13	3.6667	13.56	4.1194
25.31	3.8501	13.73	4.1456	24.56	3.8409	14.61	4.1493	24.37	3.8296	14	4.1485	24.94	3.7123	13.74	4.1238	24.75	3.7828	13.56	4.0675	25.32	3.6677	13.74	4.1182
25.68	3.8517	13.91	4.1445	24.93	3.8427	14.79	4.1482	24.56	3.8306	14.17	4.1472	25.31	3.714	13.91	4.1225	24.94	3.7838	13.74	4.0662	25.5	3.6687	13.91	4.1169
25.87	3.8527	14	4.1438	25.31	3.8445	14.87	4.1475	24.75	3.8316	14.35	4.1461	25.5	3.7152	14	4.1219	25.31	3.7855	13.91	4.0649	25.88	3.6705	14	4.1162
26.25	3.8543	14.17	4.1425	25.68	3.8462	15.05	4.1464	25.12	3.8333	14.44	4.1454	25.87	3.7171	14.17	4.1207	25.5	3.7865	14	4.0643	26.25	3.6722	14.18	4.1151
26.43	3.8553	14.35	4.1414	26.06	3.848	15.22	4.1453	25.31	3.8341	14.61	4.1443	26.06	3.7181	14.35	4.1194	25.69	3.7875	14.17	4.0631	26.63	3.674	14.35	4.114
26.81	3.8567	14.43	4.1408	26.25	3.8488	15.31	4.1446	25.5	3.8351	14.79	4.1432	26.25	3.719	14.44	4.1188	25.87	3.7885	14.35	4.0618	26.82	3.675	14.44	4.1133
27	3.8577	14.61	4.1396	26.62	3.8504	15.49	4.1435	25.68	3.8361	14.87	4.1425	26.62	3.7208	14.61	4.1175	26.25	3.7904	14.44	4.0613	27.19	3.6768	14.61	4.1122
27.18	3.8585	14.78	4.1383	26.81	3.8514	15.66	4.1424	26.06	3.8378	15.05	4.1414	26.81	3.7218	14.79	4.1164	26.62	3.7922	14.61	4.0601	27.57	3.6785	14.79	4.1109
27.56	3.8601	14.87	4.1377	27.18	3.853	15.75	4.1419	26.25	3.8387	15.22	4.1403	27	3.7228	14.87	4.1156	27	3.7941	14.79	4.0588	27.94	3.6803	14.88	4.1102
27.93	3.8617	15.05	4.1366	27.56	3.8546	15.92	4.1408	26.62	3.8404	15.31	4.1396	27.19	3.7237	15.05	4.1144	27.19	3.7951	14.87	4.0583	28.13	3.6813	15.05	4.1091
28.12	3.8625	15.22	4.1353	27.93	3.8562	16.1	4.1396	27	3.8422	15.48	4.1385	27.37	3.7247	15.22	4.1132	27.56	3.7968	15.05	4.057	28.5	3.683	15.23	4.108
28.5	3.8642	15.31	4.1348	28.12	3.8572	16.19	4.139	27.18	3.843	15.66	4.1374	27.56	3.7257	15.31	4.1127	27.75	3.7978	15.22	4.0559	28.88	3.6848	15.31	4.1075
28.87	3.8658	15.48	4.1336	28.5	3.8587	16.36	4.138	27.56	3.8446	15.75	4.1367	27.94	3.7274	15.49	4.1114	28.12	3.7996	15.31	4.0552	29.07	3.6858	15.49	4.1062
29.06	3.8664	15.66	4.1324	28.87	3.8603	16.54	4.1369	27.75	3.8456	15.92	4.1356	28.12	3.7284	15.66	4.1102	28.31	3.8006	15.49	4.0541	29.44	3.6874	15.66	4.1051
29.43	3.868	15.75	4.1317	29.06	3.8611	16.62	4.1362	28.12	3.8472	16.1	4.1345	28.31	3.7294	15.75	4.1096	28.69	3.8023	15.66	4.0528	29.63	3.6884	15.75	4.1046
29.81	3.8696	15.92	4.1306	29.43	3.8625	16.8	4.1351	28.5	3.8488	16.18	4.134	28.69	3.7312	15.92	4.1083	28.87	3.8033	15.75	4.0521	30	3.6902	15.93	4.1035
30	3.8703	16.1	4.1295	29.62	3.8635	16.97	4.1341	28.87	3.8504	16.36	4.1328	29.06	3.7331	16.1	4.1072	29.06	3.8041	16.01	4.0505	30.38	3.6919	16.1	4.1022
30.37	3.8719	16.18	4.129	30	3.865	17.06	4.1335	29.06	3.8512	16.53	4.1317	29.44	3.735	16.19	4.1065	29.25	3.8051	16.19	4.0494	30.75	3.6935	16.19	4.1017
30.75	3.8734	16.36	4.1278	30.37	3.8664	17.24	4.1324	29.43	3.8529	16.62	4.1312	29.81	3.7368	16.36	4.1054	29.62	3.8069	16.36	4.0481	30.94	3.6945	16.36	4.1004
30.93	3.874	16.53	4.1267	30.75	3.8679	17.41	4.1314	29.81	3.8543	16.8	4.1301	30	3.7376	16.54	4.1043	30	3.8088	16.54	4.047	31.32	3.6961	16.54	4.0994
31.31	3.8756	16.62	4.1261	30.93	3.8687	17.5	4.1307	30	3.8551	16.97	4.129	30.19	3.7386	16.62	4.1036	30.37	3.8104	16.62	4.0465	31.5	3.6971	16.63	4.0988
31.68	3.8769	16.8	4.1249	31.31	3.8701	17.76	4.1293	30.37	3.8566	17.06	4.1283	30.56	3.7404	16.8	4.1025	30.56	3.8114	16.8	4.0452	31.88	3.6987	16.8	4.0977
31.87	3.8777	16.97	4.1238	31.68	3.8716	17.94	4.1282	30.75	3.8582	17.32	4.1267	30.94	3.7423	16.97	4.1012	30.94	3.8133	16.97	4.0442	32.07	3.6997	16.98	4.0965
32.25	3.8792	17.06	4.1233	31.87	3.8722	18.11	4.1272	30.93	3.859	17.5	4.1257	31.31	3.7441	17.06	4.1007	31.31	3.8149	17.06	4.0436	32.44	3.7013	17.07	4.096
32.62	3.8805	17.23	4.1222	32.25	3.8737	18.29	4.1261	31.31	3.8604	17.67	4.1246	31.69	3.7458	17.24	4.0996	31.5	3.8159	17.24	4.0425	32.63	3.7023	17.24	4.0949
32.81	3.8813	17.41	4.1211	32.62	3.8751	18.37	4.1254	31.68	3.8619	17.85	4.1235	31.87	3.7466	17.41	4.0985	31.87	3.8175	17.41	4.0413	32.82	3.7031	17.42	4.0938
33.18	3.8826	17.5	4.1204	32.81	3.8758	18.64	4.124	31.87	3.8627	17.93	4.123	32.06	3.7476	17.5	4.0978	32.06	3.8185	17.5	4.0409	33.19	3.7048	17.5	4.0933
33.56	3.8839	17.67	4.1193	33.18	3.8772	18.81	4.123	32.25	3.864	18.11	4.1219	32.44	3.7494	17.67	4.0967	32.44	3.8203	17.67	4.0396	33.57	3.7066	17.68	4.0922
33.75	3.8847	17.85	4.1183	33.56	3.8785	18.99	4.1219	32.62	3.8654	18.28	4.1209	32.81	3.751	17.85	4.0956	32.81	3.822	17.85	4.0386	33.75	3.7074	17.85	4.091
34.12	3.8859	17.93	4.1177	33.75	3.8792	19.16	4.1209	32.81	3.8663	18.37	4.1204	33	3.752	17.94	4.0951	33	3.823	17.94	4.0379	34.13	3.7092	17.94	4.0906
34.5	3.8872	18.11	4.1167	34.12	3.8805	19.25	4.1203	33.18	3.8675	18.55	4.1193	33.37	3.7537	18.11	4.0939	33.37	3.8246	18.2	4.0363	34.5	3.7108	18.12	4.0896
34.68	3.8879	18.28	4.1156	34.5	3.8819	19.42	4.1193	33.56	3.869	18.72	4.1183	33.75	3.7554	18.29	4.0927	33.56	3.8256	18.37	4.0352	34.69	3.7118	18.29	4.0885
35.06	3.8893	18.37	4.1151	34.68	3.8826	19.6	4.1183	33.75	3.8696	18.81	4.1177	34.12	3.7571	18.37	4.0922	33.75	3.8264	18.55	4.0342	35.07	3.7134	18.38	4.088
35.43	3.8905	18.55	4.1138	35.06	3.8839	19.69	4.1177	34.12	3.8711	18.98	4.1167	34.5	3.7589	18.55	4.091	33.94	3.8274	18.72	4.0331	35.44	3.715	18.55	4.0868
35.62	3.8911	18.72	4.1128	35.43	3.8851	19.95	4.1162	34.5	3.8724	19.16	4.1157	34.69	3.7597	18.72	4.0899	34.31	3.829	18.81	4.0326	35.63	3.716	18.73	4.0857
36	3.8926	18.81	4.1123	35.62	3.8858	20.12	4.1153	34.68	3.873	19.25	4.1153	35.06	3.7613	18.81	4.0894	34.69	3.8307	18.99	4.0315	36	3.7176	18.82	4.0854
36.37	3.8937	18.98	4.1112	36	3.8871	20.3	4.1143	35.06	3.8745	19.42	4.1141	35.25	3.7623	18.99	4.0883	35.06	3.8325	19.16	4.0304	36.19	3.7186	18.99	4.0843
36.56	3.8943	19.16	4.1102	36.37	3.8884	20.47	4.1132	35.43	3.8758	19.68	4.1125	35.62	3.7639	19.16	4.0873	35.44	3.8341	19.25	4.0299	36.57	3.7202	19.17	4.0831
36.93	3.8955	19.25	4.1096	36.56	3.889	20.56	4.1127	35.62	3.8764	19.86	4.1115	36	3.7655	19.25	4.0867	35.62	3.8351	19.42	4.0289	36.94	3.7218	19.25	4.0827
37.31	3.8968	19.42	4.1086	36.93	3.8901	20.74	4.1117	35.99	3.8777	20.12	4.1101	36.37	3.7673	19.42	4.0856	36	3.8369	19.6	4.0278	37.32	3.7236	19.43	4.0817
37.5	3.8974	19.6	4.1075	37.31	3.8914	20.91	4.1107	36.37	3.879	20.3	4.109	36.56	3.7681	19.6	4.0846	36.37	3.8385	19.69	4.0273	37.5	3.7244	19.6	4.0806
37.87	3.8987	19.68	4.107	37.49	3.8921	21	4.1102	36.56	3.8797	20.47	4.108	36.94	3.7697	19.69	4.0839	36.56	3.8393	19.86	4.0262	37.88	3.726	19.69	4.0801
38.25	3.8998	19.86	4.1059	37.87	3.8932	21.26	4.1088	36.93	3.8809	20.56	4.1075	37.31	3.7715	19.86	4.0828	36.75	3.8403	20.04	4.0252	38.07	3.727	19.87	4.0789
38.43	3.9005	20.03	4.1049	38.24	3.8945	21.44	4.1078	37.31	3.8821	20.73	4.1065	37.5	3.7722	20.04	4.0818	37.12	3.8419	20.12	4.0246	38.44	3.7286	20.13	4.0775
38.81	3.9016	20.12	4.1044	38.43	3.895	21.7	4.1064	37.49	3.8829	21	4.1051	37.87	3.7738	20.12	4.0812	37.5	3.8435	20.3	4.0236	38.82	3.7302	20.3	4.0765
39.18	3.9027	20.3	4.1033	38.81	3.8963	21.87	4.1054	37.87	3.884	21.17	4.104	38.25	3.7754	20.3	4.0802	37.69	3.8445	20.47	4.0226	39	3.7312	20.48	4.0754
39.37	3.9034	20.47	4.1023	39.18	3.8974	22.05	4.1044	38.24	3.8853	21.43	4.1025	38.44	3.7762	20.56	4.0786	38.06	3.8461	20.56	4.022	39.38	3.7328	20.57	4.0749
39.75	3.9045	20.56	4.1019	39.37	3.8979	22.31	4.103	38.43	3.8858	21.61	4.1015	38.81	3.7778	20.74	4.0775	38.44	3.8479	20.74	4.021	39.76	3.7344	20.74	4.0739
40.12	3.9056	20.73	4.1007	39.74	3.8992	22.49	4.102	38.81	3.8871	21.87	4.1001	39.19	3.7794	20.91	4.0765	38.81	3.8496	20.91	4.0199	40.13	3.736	20.92	4.0728
40.31	3.9063	21	4.0993	40.12	3.9003	22.66	4.101	39.18	3.8882	22.05	4.0991	39.37	3.7802	21	4.076	39.19	3.8512	21	4.0194	40.32	3.7368	21	4.0723
40.68	3.9074	21.17	4.0983	40.31	3.9008	22.75	4.1006	39.37	3.8889	22.22	4.0981	39.75	3.7818	21.17	4.0749	39.37	3.8521	21.17	4.0184	40.51	3.7378	21.27	4.0709
41.06	3.9085	21.35	4.0972	40.68	3.9019	22.92	4.0996	39.74	3.89	22.31	4.0977	40.12	3.7833	21.35	4.0739	39.75	3.8537	21.44	4.017	40.88	3.7394	21.44	4.0699
41.25	3.909	21.43	4.0967	41.06	3.9031	23.1	4.0986	40.12	3.8911	22.48	4.0967	40.31	3.7841	21.44	4.0733	40.12	3.8554	21.61	4.0158	41.26	3.741	21.62	4.0689
41.62	3.9102	21.61	4.0957	41.24	3.9037	23.19	4.0981	40.31	3.8918	22.66	4.0957	40.69	3.7857	21.61	4.0723	40.31	3.8562	21.87	4.0144	41.63	3.7426	21.88	4.0673
42	3.9113	21.87	4.0943	41.62	3.9048	23.45	4.0967	40.68	3.8929	22.75	4.0952	41.06	3.7872	21.87	4.0707	40.69	3.8579	22.05	4.0134	42.01	3.7442	22.14	4.0659
42.18	3.9119	22.05	4.0931	41.99	3.9058	23.62	4.0957	41.06	3.894	23.01	4.0938	41.25	3.788	22.05	4.0697	41.06	3.8595	22.22	4.0124	42.19	3.745	22.32	4.0649
42.56	3.9129	22.31	4.0917	42.18	3.9064	23.89	4.0944	41.24	3.8945	23.18	4.0928	41.62	3.7896	22.31	4.0681	41.25	3.8603	22.31	4.012	42.38	3.746	22.58	4.0634
42.93	3.914	22.48	4.0907	42.56	3.9074	24.06	4.0935	41.62	3.8958	23.45	4.0914	42	3.791	22.57	4.0667	41.44	3.8613	22.49	4.0108	42.76	3.7475	22.75	4.0625
43.12	3.9145	22.75	4.0893	42.93	3.9085	24.24	4.0925	41.99	3.8969	23.62	4.0906	42.19	3.7918	22.75	4.0657	41.81	3.8629	22.75	4.0094	43.13	3.7492	22.93	4.0615
43.5	3.9156	22.92	4.0883	43.12	3.909	24.41	4.0915	42.18	3.8974	23.8	4.0896	42.56	3.7931	22.92	4.0647	42.19	3.8645	22.92	4.0084	43.51	3.7508	23.19	4.0602
43.87	3.9168	23.1	4.0873	43.49	3.9102	24.5	4.0912	42.56	3.8985	23.97	4.0886	42.75	3.7941	23.1	4.0636	42.56	3.8661	23.1	4.0074	43.88	3.7525	23.37	4.0591
44.06	3.9173	23.18	4.0868	43.87	3.9113	24.67	4.0902	42.93	3.8997	24.06	4.0881	43.12	3.7954	23.19	4.0631	42.94	3.8677	23.19	4.007	44.07	3.7533	23.63	4.0578
44.62	3.9187	23.45	4.0854	44.06	3.9118	24.94	4.0888	43.12	3.9002	24.32	4.0868	43.5	3.797	23.45	4.0617	43.12	3.8685	23.36	4.006	44.44	3.7549	23.8	4.0568
44.99	3.9198	23.62	4.0844	44.62	3.9132	25.2	4.0875	43.49	3.9013	24.5	4.0859	43.87	3.7983	23.62	4.0607	43.5	3.8701	23.54	4.005	44.82	3.7565	24.07	4.0554
45.37	3.9208	23.88	4.083	44.99	3.9144	25.37	4.0865	43.87	3.9024	24.67	4.0849	44.06	3.7991	23.8	4.0596	43.87	3.8717	23.62	4.0045	45.01	3.7573	24.24	4.0544
45.74	3.9218	24.06	4.082	45.56	3.9158	25.64	4.0852	44.06	3.9029	24.85	4.0839	44.44	3.8006	23.97	4.0586	44.06	3.8726	23.89	4.0029	45.38	3.7589	24.42	4.0534
45.93	3.9224	24.23	4.081	45.93	3.9168	25.81	4.0843	44.43	3.9039	24.93	4.0835	44.81	3.802	24.06	4.0581	44.44	3.8742	24.06	4.0021	45.76	3.7605	24.5	4.053
46.31	3.9234	24.5	4.0796	46.31	3.9179	25.99	4.0833	44.81	3.905	25.11	4.0825	45	3.8027	24.32	4.0567	44.81	3.8758	24.24	4.0011	45.94	3.7613	24.77	4.0517
46.68	3.9244	24.67	4.0786	46.68	3.9189	26.25	4.082	44.99	3.9055	25.37	4.0812	45.37	3.8039	24.5	4.0557	45	3.8766	24.5	3.9997	46.32	3.7629	24.94	4.0507
46.87	3.9248	24.85	4.0776	46.87	3.9194	26.51	4.0807	45.56	3.9069	25.63	4.0799	45.75	3.8054	24.67	4.0547	45.37	3.8782	24.67	3.9987	46.69	3.7644	25.12	4.0497
47.24	3.9258	24.93	4.0773	47.43	3.9208	26.69	4.0797	45.93	3.9081	25.81	4.0789	45.94	3.806	24.94	4.0533	45.75	3.8798	24.94	3.9973	46.88	3.7652	25.38	4.0484
47.62	3.9269	25.2	4.0759	47.81	3.9218	26.95	4.0785	46.31	3.9092	26.07	4.0775	46.31	3.8075	25.11	4.0523	45.94	3.8805	25.11	3.9963	47.26	3.7668	25.55	4.0473
47.81	3.9274	25.37	4.0749	48.18	3.9228	27.12	4.0776	46.68	3.9102	26.25	4.0767	46.69	3.809	25.29	4.0513	46.31	3.8821	25.29	3.9953	47.63	3.7684	25.82	4.046
48.18	3.9284	25.63	4.0736	48.74	3.9242	27.39	4.0762	46.87	3.9106	26.42	4.0757	46.87	3.8096	25.37	4.0507	46.69	3.8837	25.37	3.9949	47.82	3.7692	26.08	4.0446
48.56	3.9294	25.81	4.0726	49.12	3.9252	27.56	4.0754	47.24	3.9116	26.68	4.0744	47.25	3.8109	25.64	4.0494	46.87	3.8845	25.55	3.9939	48.19	3.7707	26.25	4.0438
48.74	3.9297	26.07	4.0712	49.68	3.9265	27.74	4.0744	47.62	3.9126	26.95	4.0731	47.62	3.8123	25.81	4.0484	47.25	3.8861	25.81	3.9924	48.57	3.7723	26.43	4.0428
49.12	3.9307	26.24	4.0702	50.24	3.9279	28	4.0731	47.81	3.9131	27.12	4.0722	47.81	3.813	26.07	4.047	47.62	3.8876	26.07	3.9911	48.76	3.7731	26.69	4.0415
49.68	3.9321	26.51	4.0689	50.62	3.9289	28.26	4.0718	48.18	3.9142	27.38	4.0709	48.19	3.8143	26.25	4.046	47.81	3.8884	26.25	3.9902	49.13	3.7747	26.87	4.0405
50.06	3.9331	26.68	4.068	50.99	3.9299	28.44	4.071	48.56	3.9152	27.56	4.0699	48.56	3.8156	26.42	4.045	48.19	3.89	26.42	3.9892	49.51	3.7763	27.13	4.0392
50.43	3.9341	26.94	4.0667	51.56	3.9311	28.7	4.0697	48.74	3.9156	27.82	4.0686	48.75	3.8162	26.69	4.0436	48.56	3.8914	26.69	3.9879	49.69	3.7772	27.39	4.0378
50.62	3.9345	27.12	4.0657	51.93	3.9321	28.87	4.0688	49.12	3.9166	28	4.0678	49.12	3.8175	26.86	4.0426	48.75	3.8922	26.86	3.9869	50.07	3.7786	27.57	4.037
50.99	3.9355	27.29	4.0647	52.49	3.9334	29.13	4.0675	49.49	3.9176	28.26	4.0665	49.5	3.8188	27.12	4.0413	49.12	3.8939	27.12	3.9857	50.44	3.7802	27.83	4.0357
51.56	3.9368	27.56	4.0634	53.06	3.9347	29.31	4.0667	49.68	3.9181	28.43	4.0655	49.69	3.8194	27.39	4.0399	49.5	3.8953	27.3	3.9847	50.63	3.7809	28	4.0347
51.93	3.9378	27.82	4.0622	53.43	3.9357	29.57	4.0654	50.24	3.9194	28.7	4.0643	50.06	3.8207	27.56	4.0389	49.69	3.8961	27.47	3.9837	51.01	3.7825	28.27	4.0334
52.49	3.9391	27.99	4.0612	53.99	3.937	29.75	4.0646	50.62	3.9203	28.87	4.0634	50.44	3.822	27.74	4.0379	50.06	3.8976	27.56	3.9832	51.38	3.7839	28.44	4.0325
52.87	3.9402	28.26	4.0599	54.37	3.9378	29.92	4.0636	50.99	3.9213	29.13	4.0622	50.62	3.8227	28	4.0367	50.44	3.899	27.82	3.9819	51.57	3.7847	28.7	4.0312
53.43	3.9413	28.43	4.0591	54.93	3.9391	30.18	4.0625	51.37	3.9223	29.31	4.0612	51	3.824	28.17	4.0357	50.62	3.8997	28	3.9811	51.94	3.7864	28.88	4.0304
53.81	3.9423	28.61	4.0581	55.31	3.94	30.36	4.0615	51.56	3.9228	29.57	4.0599	51.37	3.8251	28.35	4.0347	51	3.9013	28.26	3.9797	52.32	3.7878	29.05	4.0294
54.18	3.9433	28.87	4.0568	55.87	3.9412	30.62	4.0604	52.12	3.924	29.75	4.0591	51.56	3.8257	28.44	4.0344	51.37	3.9027	28.44	3.9789	52.51	3.7886	29.32	4.0281
54.37	3.9436	29.13	4.0555	56.24	3.9421	30.88	4.0591	52.49	3.925	30.01	4.0578	51.94	3.827	28.61	4.0334	51.56	3.9035	28.61	3.9779	52.88	3.7901	29.58	4.0268
54.93	3.945	29.31	4.0546	56.8	3.9434	31.06	4.0583	52.87	3.926	30.18	4.057	52.31	3.8283	28.87	4.032	51.94	3.905	28.79	3.9769	53.26	3.7917	29.75	4.0258
55.31	3.9458	29.57	4.0533	57.18	3.9442	31.23	4.0573	53.43	3.9273	30.45	4.0557	52.5	3.8288	29.05	4.031	52.31	3.9064	28.87	3.9766	53.44	3.7923	30.02	4.0246
55.68	3.9468	29.74	4.0525	57.74	3.9455	31.5	4.056	53.99	3.9286	30.62	4.0549	52.87	3.8299	29.31	4.0297	52.5	3.9071	29.14	3.9752	53.82	3.7939	30.19	4.0237
56.24	3.9479	29.92	4.0515	58.12	3.9463	31.76	4.0549	54.37	3.9295	30.8	4.0539	53.25	3.8312	29.49	4.0287	52.87	3.9087	29.31	3.9744	54.19	3.7954	30.45	4.0225
56.62	3.9489	30.18	4.0504	58.68	3.9474	31.93	4.0541	54.93	3.9308	31.06	4.0528	53.44	3.8317	29.75	4.0275	53.25	3.91	29.49	3.9734	54.38	3.7962	30.63	4.0216
57.18	3.95	30.36	4.0494	59.05	3.9483	32.2	4.0528	55.3	3.9316	31.23	4.0518	53.81	3.8328	29.92	4.0265	53.44	3.9108	29.75	3.9721	54.76	3.7977	30.89	4.0204
57.56	3.951	30.53	4.0484	59.62	3.9495	32.37	4.052	55.68	3.9326	31.5	4.0505	54.19	3.834	30.19	4.0252	53.81	3.9123	30.01	3.9708	55.13	3.7991	31.07	4.0195
58.12	3.9521	30.62	4.0481	59.99	3.9504	32.63	4.0509	56.24	3.9339	31.76	4.0494	54.37	3.8346	30.36	4.0242	54.19	3.9137	30.19	3.97	55.32	3.7999	31.33	4.0183
58.49	3.9531	30.88	4.0468	60.55	3.9515	32.81	4.0501	56.8	3.9352	31.93	4.0486	54.75	3.8357	30.62	4.0229	54.37	3.9144	30.36	3.969	55.69	3.8014	31.5	4.0175
59.06	3.9542	31.06	4.046	60.93	3.9525	32.98	4.0491	57.18	3.936	32.11	4.0476	55.12	3.8369	30.89	4.0216	54.75	3.9158	30.62	3.9677	56.07	3.8028	31.68	4.0165
59.43	3.9552	31.32	4.0447	61.68	3.9539	33.25	4.048	57.74	3.9373	32.37	4.0465	55.31	3.8375	31.06	4.0207	55.12	3.9173	30.89	3.9665	56.26	3.8035	31.94	4.0152
59.99	3.9563	31.49	4.0438	61.87	3.9544	33.51	4.0467	58.12	3.9381	32.63	4.0452	55.69	3.8387	31.32	4.0194	55.31	3.9181	31.06	3.9656	56.63	3.8049	32.21	4.0141
60.56	3.9576	31.76	4.0425	62.43	3.9555	33.68	4.0459	58.68	3.9394	32.81	4.0444	56.25	3.8403	31.5	4.0184	55.69	3.9194	31.32	3.9644	57.01	3.8064	32.38	4.0133
60.93	3.9584	31.93	4.0417	62.8	3.9563	33.95	4.0446	59.05	3.9402	33.07	4.0433	56.62	3.8414	31.76	4.0171	56.06	3.9207	31.5	3.9634	57.19	3.8072	32.56	4.0123
61.49	3.9597	32.19	4.0404	63.37	3.9575	34.12	4.0438	59.62	3.9413	33.24	4.0423	57	3.8425	31.94	4.0162	56.25	3.9215	31.76	3.9621	57.57	3.8086	32.82	4.0112
61.87	3.9605	32.37	4.0396	63.74	3.9583	34.38	4.0426	59.99	3.9423	33.51	4.0412	57.19	3.843	32.2	4.0149	56.62	3.9229	31.94	3.9613	57.94	3.8101	32.99	4.0102
62.43	3.9617	32.63	4.0384	64.49	3.9597	34.56	4.0418	60.55	3.9434	33.68	4.0402	57.56	3.844	32.37	4.0141	57	3.9242	32.11	3.9603	58.13	3.8107	33.26	4.0091
62.81	3.9625	32.81	4.0375	64.68	3.9602	34.82	4.0405	60.93	3.9442	33.94	4.0391	57.94	3.8451	32.55	4.0131	57.19	3.9248	32.37	3.9592	58.51	3.8122	33.43	4.0081
63.37	3.9636	33.07	4.0363	65.24	3.9613	35	4.0399	61.49	3.9455	34.12	4.0383	58.12	3.8458	32.81	4.0118	57.56	3.9263	32.55	3.9582	58.88	3.8136	33.69	4.007
63.74	3.9644	33.24	4.0355	65.62	3.962	35.26	4.0386	61.87	3.9463	34.38	4.037	58.69	3.8472	33.07	4.0105	57.94	3.9276	32.81	3.9569	59.07	3.8143	33.96	4.0057
64.31	3.9655	33.51	4.0342	66.18	3.9631	35.43	4.0378	62.43	3.9474	34.56	4.0363	59.06	3.8482	33.25	4.0097	58.12	3.9282	33.07	3.9558	59.45	3.8157	34.13	4.0049
64.68	3.9663	33.68	4.0333	66.55	3.9639	35.7	4.0367	62.8	3.9483	34.82	4.035	59.44	3.8493	33.42	4.0087	58.5	3.9295	33.25	3.9548	59.82	3.817	34.39	4.0036
65.24	3.9675	33.94	4.0321	67.12	3.965	35.87	4.0358	63.37	3.9494	34.99	4.0342	59.81	3.8503	33.69	4.0076	58.87	3.931	33.51	3.9535	60.01	3.8178	34.57	4.0028
65.62	3.9683	34.12	4.0313	67.49	3.9658	36.13	4.0347	63.74	3.9504	35.26	4.0331	60	3.8508	33.86	4.0066	59.06	3.9316	33.69	3.9527	60.38	3.8193	34.83	4.0016
66.18	3.9694	34.38	4.03	68.05	3.967	36.31	4.0339	64.49	3.9518	35.43	4.0323	60.56	3.8524	34.12	4.0053	59.44	3.9329	33.95	3.9516	60.76	3.8206	35.01	4.0008
66.55	3.9702	34.56	4.0294	68.43	3.9676	36.57	4.0328	64.68	3.9521	35.69	4.031	60.94	3.8533	34.39	4.0041	59.81	3.9342	34.12	3.9506	60.95	3.8212	35.27	3.9995
67.12	3.9713	34.73	4.0284	68.99	3.9688	36.75	4.032	65.24	3.9533	35.87	4.0302	61.5	3.8546	34.56	4.0032	60	3.9349	34.39	3.9495	61.32	3.8227	35.44	3.9987
67.49	3.9721	34.99	4.0271	69.37	3.9696	37.01	4.0308	65.62	3.9542	36.13	4.0291	61.87	3.8558	34.82	4.002	60.37	3.9363	34.56	3.9487	61.7	3.824	35.71	3.9976
68.05	3.9733	35.26	4.026	70.12	3.9709	37.18	4.03	66.18	3.9552	36.31	4.0283	62.44	3.8571	35	4.001	60.75	3.9374	34.82	3.9474	61.88	3.8246	35.88	3.9968
68.43	3.9741	35.43	4.0252	70.3	3.9712	37.45	4.0287	66.55	3.956	36.57	4.0271	62.81	3.858	35.26	3.9997	60.94	3.9381	35	3.9466	62.26	3.8261	36.06	3.9958
68.99	3.9752	35.69	4.0241	70.87	3.9723	37.62	4.0279	67.12	3.9571	36.74	4.0263	63.19	3.859	35.44	3.9989	61.31	3.9394	35.17	3.9456	62.63	3.8274	36.32	3.9947
69.37	3.9759	35.87	4.0233	71.24	3.9731	37.88	4.0268	67.49	3.9579	37.01	4.0252	63.56	3.86	35.7	3.9976	61.69	3.9407	35.44	3.9445	62.82	3.8282	36.58	3.9936
69.93	3.977	36.04	4.0223	71.8	3.9742	38.06	4.0262	68.05	3.9591	37.18	4.0244	63.75	3.8603	35.87	3.9968	61.87	3.9413	35.7	3.9432	63.2	3.8293	36.76	3.9928
70.3	3.9778	36.31	4.0212	72.18	3.9749	38.32	4.025	68.43	3.9597	37.44	4.0231	64.12	3.8613	36.05	3.9958	62.25	3.9426	35.87	3.9424	63.57	3.8307	37.02	3.9915
70.87	3.9789	36.57	4.02	72.74	3.976	38.5	4.0242	68.99	3.9608	37.62	4.0223	64.69	3.8627	36.31	3.9947	62.62	3.9437	36.14	3.9413	63.76	3.8314	37.19	3.9907
71.24	3.9796	36.74	4.0192	73.12	3.9767	38.76	4.0231	69.37	3.9617	37.88	4.0212	65.25	3.864	36.49	3.9937	62.81	3.9444	36.31	3.9405	64.13	3.8327	37.46	3.9895
71.8	3.9807	37.01	4.0179	73.68	3.9778	38.93	4.0223	69.93	3.9628	38.06	4.0204	65.62	3.8648	36.75	3.9926	63.19	3.9457	36.49	3.9395	64.51	3.834	37.63	3.9887
72.18	3.9815	37.18	4.0171	74.05	3.9784	39.2	4.021	70.3	3.9634	38.32	4.0192	66	3.8658	37.01	3.9913	63.56	3.947	36.75	3.9384	64.7	3.8346	37.89	3.9876
72.74	3.9826	37.44	4.016	74.61	3.9794	39.37	4.0204	70.87	3.9646	38.49	4.0186	66.56	3.8671	37.19	3.9905	63.75	3.9474	37.01	3.9371	65.07	3.8361	38.07	3.9866
73.12	3.9833	37.62	4.0152	74.99	3.9802	39.63	4.0192	71.24	3.9652	38.76	4.0173	67.12	3.8684	37.45	3.9892	64.12	3.9487	37.19	3.9363	65.45	3.8374	38.33	3.9855
73.68	3.9844	37.88	4.0141	75.55	3.9812	39.81	4.0184	71.8	3.9663	38.93	4.0166	67.5	3.8692	37.62	3.9884	64.5	3.9499	37.45	3.9351	65.63	3.838	38.51	3.9847
74.05	3.9851	38.06	4.0133	75.93	3.9818	40.07	4.0173	72.18	3.9671	39.19	4.0154	68.06	3.8705	37.89	3.9871	64.69	3.9505	37.62	3.9343	66.01	3.8391	38.77	3.9836
74.62	3.9862	38.32	4.0121	76.49	3.983	40.25	4.0166	72.74	3.9681	39.37	4.0147	68.44	3.8713	38.06	3.9863	65.06	3.9518	37.89	3.933	66.38	3.8404	38.94	3.9828
74.99	3.9868	38.49	4.0113	76.86	3.9836	40.51	4.0154	73.11	3.9689	39.63	4.0136	69	3.8726	38.32	3.985	65.44	3.9529	38.06	3.9322	66.57	3.8411	39.21	3.9816
75.55	3.988	38.76	4.0102	77.43	3.9847	40.68	4.0147	73.68	3.9699	39.81	4.0128	69.37	3.8734	38.5	3.9842	65.62	3.9534	38.32	3.9311	66.95	3.8424	39.38	3.9808
75.93	3.9886	38.93	4.0094	77.8	3.9854	40.95	4.0136	74.05	3.9705	40.07	4.0116	69.94	3.8746	38.76	3.9831	66	3.9547	38.5	3.9303	67.32	3.8437	39.64	3.9797
76.49	3.9897	39.19	4.0083	78.55	3.9868	41.12	4.0128	74.61	3.9717	40.24	4.0108	70.31	3.8753	38.94	3.9823	66.37	3.9558	38.76	3.9292	67.51	3.8441	39.82	3.9789
76.87	3.9904	39.37	4.0074	78.74	3.987	41.38	4.0116	74.99	3.9723	40.51	4.0097	70.87	3.8766	39.11	3.9813	66.56	3.9565	38.94	3.9284	67.88	3.8454	40.08	3.9777
77.43	3.9915	39.63	4.0063	79.3	3.9881	41.56	4.011	75.55	3.9734	40.68	4.0089	71.25	3.8774	39.37	3.9802	66.94	3.9576	39.2	3.9271	68.26	3.8467	40.26	3.9769
77.8	3.9922	39.8	4.0055	79.68	3.9888	41.82	4.0099	75.93	3.9741	40.94	4.0078	71.81	3.8785	39.64	3.979	67.31	3.9587	39.37	3.9263	68.45	3.8474	40.52	3.9758
78.37	3.9933	40.07	4.0044	80.43	3.9902	42	4.0091	76.49	3.9752	41.12	4.0071	72.19	3.8793	39.81	3.9781	67.5	3.9592	39.64	3.9251	68.82	3.8485	40.69	3.975
78.74	3.9939	40.24	4.0036	80.61	3.9905	42.26	4.0079	76.86	3.9759	41.38	4.006	72.75	3.8805	40.07	3.9769	67.87	3.9604	39.81	3.9243	69.2	3.8498	40.96	3.9739
79.3	3.9951	40.5	4.0024	81.18	3.9915	42.43	4.0073	77.61	3.9773	41.56	4.0052	73.12	3.8813	40.25	3.9761	68.25	3.9615	40.07	3.9232	69.38	3.8504	41.13	3.9731
79.68	3.9957	40.68	4.0016	81.55	3.9922	42.7	4.0062	77.8	3.9776	41.82	4.0041	73.69	3.8824	40.51	3.9748	68.44	3.9621	40.25	3.9224	69.76	3.8516	41.39	3.9719
80.24	3.9968	40.94	4.0005	82.3	3.9935	42.87	4.0053	78.36	3.9786	41.99	4.0034	74.06	3.883	40.69	3.974	68.81	3.9633	40.51	3.9211	70.13	3.8527	41.57	3.9711
80.62	3.9975	41.12	3.9997	82.49	3.9938	43.13	4.0042	78.74	3.9794	42.26	4.0021	74.62	3.8842	40.95	3.9727	69.37	3.9647	40.69	3.9205	70.32	3.8533	41.83	3.97
81.18	3.9986	41.38	3.9986	83.05	3.9949	43.31	4.0036	79.3	3.9804	42.43	4.0015	75	3.885	41.12	3.9719	69.75	3.966	40.95	3.9192	70.7	3.8545	42.01	3.9692
81.55	3.9993	41.55	3.9979	83.43	3.9955	43.57	4.0024	79.68	3.981	42.69	4.0003	75.56	3.8861	41.39	3.9708	70.12	3.967	41.12	3.9184	71.07	3.8558	42.27	3.9681
82.3	4.0006	41.82	3.9968	83.99	3.9965	43.75	4.0016	80.24	3.982	42.87	3.9995	75.94	3.8868	41.56	3.97	70.31	3.9676	41.39	3.9172	71.26	3.8562	42.44	3.9673
82.49	4.0009	41.99	3.996	84.36	3.9972	44.1	4.0002	80.61	3.9828	43.13	3.9984	76.5	3.8879	41.82	3.9689	70.69	3.9686	41.56	3.9166	71.63	3.8574	42.71	3.9661
83.05	4.002	42.25	3.9949	85.11	3.9985	44.18	3.9999	81.36	3.9841	43.31	3.9978	76.87	3.8885	42	3.9679	71.06	3.9697	41.82	3.9153	72.01	3.8585	42.88	3.9655
83.43	4.0027	42.43	3.994	85.3	3.9988	44.45	3.9989	81.55	3.9844	43.57	3.9966	77.44	3.8897	42.26	3.9668	71.25	3.9702	42	3.9146	72.2	3.8592	43.14	3.9642
84.18	4.0039	42.69	3.9929	86.05	4.0001	44.62	3.9981	82.11	3.9854	43.74	3.9958	77.81	3.8903	42.44	3.966	71.62	3.9713	42.26	3.9134	72.57	3.8603	43.32	3.9635
84.37	4.0043	42.87	3.9921	86.24	4.0006	44.88	3.997	82.49	3.986	44.01	3.9947	78.37	3.8914	42.7	3.9648	72	3.9723	42.44	3.9127	72.95	3.8614	43.58	3.9624
84.93	4.0054	43.13	3.991	86.99	4.0018	45.06	3.9963	83.05	3.987	44.18	3.994	78.75	3.8921	42.87	3.964	72.19	3.9728	42.7	3.9116	73.13	3.8619	43.76	3.9616
85.3	4.006	43.3	3.9903	87.18	4.0022	45.32	3.9952	83.43	3.9876	44.44	3.9929	79.31	3.8931	43.14	3.9627	72.56	3.9739	42.87	3.9108	73.51	3.8632	44.02	3.9605
85.87	4.007	43.57	3.9892	87.93	4.0033	45.5	3.9944	83.99	3.9886	44.62	3.9923	79.69	3.8939	43.31	3.9621	72.94	3.9749	43.14	3.9095	73.88	3.8642	44.19	3.9597
86.24	4.0077	43.74	3.9884	88.11	4.0038	45.76	3.9932	84.36	3.9894	44.88	3.9911	80.44	3.8951	43.57	3.9608	73.12	3.9754	43.31	3.9088	74.07	3.8646	44.46	3.9587
86.8	4.0088	44	3.9873	88.68	4.0048	45.93	3.9926	84.93	3.9904	45.06	3.9905	80.62	3.8955	43.75	3.96	73.69	3.9768	43.57	3.9077	74.45	3.8659	44.63	3.9579
87.18	4.0094	44.18	3.9866	89.05	4.0052	46.2	3.9916	85.3	3.991	45.32	3.9892	81.19	3.8966	44.01	3.9589	74.06	3.978	43.75	3.9069	74.82	3.8669	44.89	3.9568
87.74	4.0104	44.44	3.9855	89.61	4.0062	46.37	3.9908	85.86	3.992	45.49	3.9886	81.56	3.8972	44.19	3.9581	74.62	3.9794	44.01	3.9058	75.01	3.8674	45.07	3.956
88.11	4.011	44.62	3.9847	89.99	4.007	46.72	3.9894	86.24	3.9926	45.76	3.9874	82.12	3.8982	44.45	3.9569	75	3.9804	44.19	3.905	75.38	3.8685	45.33	3.955
88.68	4.012	44.88	3.9836	90.74	4.0083	46.81	3.989	86.8	3.9936	45.93	3.9868	82.5	3.8989	44.62	3.9561	75.56	3.9817	44.45	3.9038	75.76	3.8696	45.51	3.9542
89.05	4.0127	45.05	3.9829	90.93	4.0085	47.07	3.9879	87.18	3.9943	46.19	3.9857	83.25	3.9002	44.89	3.955	75.94	3.9828	44.62	3.903	75.95	3.8701	45.77	3.9531
89.61	4.0138	45.32	3.9818	91.49	4.0096	47.25	3.9873	87.93	3.9955	46.37	3.9848	83.44	3.9005	45.06	3.9542	76.5	3.9841	44.89	3.9019	76.32	3.8711	45.94	3.9522
89.99	4.0144	45.49	3.9811	91.86	4.0101	47.51	3.9861	88.11	3.9959	46.72	3.9836	84.19	3.9018	45.32	3.9531	76.87	3.9851	45.06	3.9013	76.7	3.8722	46.21	3.9511
90.55	4.0154	45.75	3.98	92.61	4.0114	47.68	3.9855	88.86	3.9972	46.8	3.9831	84.37	3.9021	45.5	3.9521	77.44	3.9865	45.32	3.9001	76.88	3.8727	46.38	3.9505
90.93	4.016	45.93	3.9792	92.8	4.0117	47.95	3.9844	89.05	3.9975	47.07	3.9821	84.94	3.9031	45.76	3.951	77.81	3.9873	45.5	3.8993	77.26	3.8737	46.64	3.9493
91.49	4.017	46.19	3.9781	93.36	4.0127	48.12	3.9837	89.61	3.9985	47.24	3.9813	85.31	3.9037	45.94	3.9503	78.19	3.9883	45.76	3.8982	77.63	3.8748	46.82	3.9485
91.86	4.0177	46.37	3.9774	93.74	4.0133	48.38	3.9826	89.99	3.9991	47.5	3.9803	85.87	3.9048	46.2	3.9492	78.75	3.9897	45.94	3.8974	77.82	3.8753	47.17	3.9471
92.61	4.019	46.63	3.9763	94.3	4.0143	48.56	3.9819	90.55	4.0001	47.68	3.9795	86.25	3.9053	46.37	3.9482	79.31	3.991	46.2	3.8962	78.2	3.8763	47.26	3.9468
92.8	4.0193	46.8	3.9757	94.68	4.0149	48.91	3.9805	90.92	4.0007	48.03	3.9781	86.81	3.9063	46.64	3.9472	79.69	3.9918	46.37	3.8956	78.76	3.8779	47.52	3.9456
93.55	4.0207	47.07	3.9745	95.24	4.0159	49	3.9802	91.49	4.0017	48.12	3.9777	87.19	3.9069	46.81	3.9464	80.25	3.9931	46.64	3.8945	79.32	3.8793	47.69	3.945
93.74	4.0209	47.24	3.9737	95.61	4.0164	49.26	3.979	91.86	4.0023	48.38	3.9766	87.75	3.9079	47.07	3.9453	80.62	3.9939	46.81	3.8937	79.7	3.8803	47.96	3.9439
94.3	4.0219	47.5	3.9727	96.36	4.0178	49.43	3.9784	92.42	4.0033	48.55	3.976	88.12	3.9085	47.25	3.9445	81	3.9949	47.07	3.8925	80.07	3.8813	48.13	3.943
94.68	4.0225	47.68	3.9719	96.55	4.018	49.7	3.9774	92.8	4.0039	48.82	3.975	88.69	3.9095	47.51	3.9434	81.56	3.9962	47.25	3.8917	80.64	3.8827	48.4	3.9419
95.24	4.0235	48.03	3.9705	97.11	4.019	49.87	3.9768	93.55	4.0052	48.99	3.9742	89.06	3.91	47.69	3.9426	82.12	3.9973	47.6	3.8903	81.01	3.8837	48.57	3.9413
95.61	4.0243	48.12	3.9702	97.49	4.0196	50.13	3.9757	93.74	4.0056	49.25	3.9731	89.62	3.911	47.95	3.9414	82.5	3.9983	47.69	3.89	81.57	3.885	48.83	3.9401
96.36	4.0256	48.38	3.969	98.05	4.0206	50.31	3.975	94.49	4.0067	49.43	3.9724	90	3.9116	48.12	3.9406	83.06	3.9994	47.95	3.8888	82.14	3.8864	49.01	3.9395
96.55	4.0257	48.55	3.9684	98.42	4.0212	50.57	3.9739	94.67	4.007	49.78	3.971	90.75	3.9127	48.39	3.9395	83.44	4.0002	48.12	3.8882	82.51	3.8874	49.27	3.9384
97.11	4.0267	48.82	3.9674	98.99	4.0222	50.75	3.9732	95.24	4.008	49.87	3.9706	90.94	3.9131	48.56	3.9387	84	4.0015	48.39	3.887	83.07	3.8887	49.45	3.9376
97.49	4.0273	48.99	3.9666	99.36	4.0227	51.1	3.9718	95.61	4.0086	50.13	3.9695	91.69	3.9144	48.82	3.9376	84.37	4.0023	48.56	3.8862	83.45	3.8897	49.71	3.9366
98.05	4.0283	49.25	3.9655	100.11	4.024	51.18	3.9715	96.17	4.0096	50.3	3.9689	91.87	3.9147	49	3.9369	84.94	4.0035	48.82	3.8851	84.01	3.891	49.88	3.9358
98.43	4.029	49.43	3.9648	100.3	4.0243	51.45	3.9705	96.55	4.0102	50.57	3.9679	92.62	3.916	49.26	3.9356	85.31	4.0043	49	3.8845	84.39	3.8919	50.15	3.9347
99.18	4.0303	49.78	3.9634	100.86	4.0253	51.62	3.9697	97.3	4.0114	50.74	3.9671	92.81	3.9161	49.44	3.9348	85.87	4.0054	49.26	3.8833	84.95	3.8931	50.32	3.934
99.36	4.0306	49.87	3.9631	101.24	4.0257	51.88	3.9687	97.49	4.0119	51	3.9661	93.37	3.9171	49.7	3.9337	86.25	4.0062	49.44	3.8825	85.32	3.894	50.58	3.9329
100.11	4.0319	50.13	3.9621	101.8	4.0267	52.06	3.9681	98.24	4.013	51.18	3.9655	93.75	3.9176	49.87	3.933	86.81	4.0075	49.7	3.8814	85.89	3.8953	50.76	3.9322
100.3	4.0322	50.3	3.9613	102.17	4.0273	52.32	3.9669	98.42	4.0133	51.44	3.9644	94.31	3.9186	50.14	3.9319	87.19	4.0081	49.87	3.8808	86.26	3.8961	51.02	3.9311
100.86	4.0332	50.57	3.9603	102.74	4.0283	52.49	3.9663	98.99	4.0143	51.62	3.9637	94.69	3.9192	50.31	3.9311	87.75	4.0093	50.14	3.8798	86.82	3.8974	51.2	3.9305
101.24	4.0338	50.74	3.9595	103.11	4.029	52.76	3.9652	99.36	4.0149	51.88	3.9626	95.44	3.9203	50.57	3.93	88.12	4.0099	50.31	3.879	87.2	3.8982	51.46	3.9293
101.99	4.0349	51	3.9585	103.86	4.0301	52.93	3.9645	100.11	4.016	52.05	3.9619	95.62	3.9207	50.75	3.9292	88.69	4.0112	50.57	3.8778	87.76	3.8995	51.63	3.9285
102.18	4.0353	51.18	3.9577	104.05	4.0304	53.19	3.9635	100.3	4.0164	52.4	3.9606	96.37	3.9218	51.01	3.928	89.06	4.0119	50.75	3.877	88.14	3.9003	51.9	3.9274
102.93	4.0365	51.53	3.9564	104.61	4.0314	53.37	3.9629	101.05	4.0175	52.49	3.9603	96.56	3.9221	51.19	3.9274	89.62	4.013	51.01	3.8759	88.7	3.9014	52.07	3.9268
103.11	4.0369	51.62	3.9561	104.99	4.032	53.63	3.9618	101.24	4.018	52.75	3.9592	97.31	3.9232	51.45	3.9263	90	4.0136	51.19	3.8753	89.07	3.9023	52.33	3.9256
103.86	4.0382	51.88	3.955	105.74	4.0332	53.81	3.9611	101.99	4.0191	52.93	3.9585	97.5	3.9236	51.62	3.9255	90.56	4.0148	51.45	3.8741	89.64	3.9034	52.51	3.925
104.05	4.0385	52.05	3.9543	105.92	4.0335	54.16	3.9598	102.17	4.0194	53.19	3.9574	98.25	3.9247	51.89	3.9243	90.94	4.0154	51.62	3.8735	90.01	3.9042	52.77	3.9238
104.8	4.0396	52.32	3.9532	106.67	4.0348	54.24	3.9595	102.74	4.0204	53.37	3.9568	98.44	3.925	52.06	3.9235	91.5	4.0165	51.89	3.8724	90.57	3.9053	52.95	3.9232
104.99	4.0399	52.49	3.9526	106.86	4.0349	54.51	3.9585	103.11	4.0211	53.63	3.9558	99.19	3.9261	52.41	3.9221	91.87	4.0172	52.06	3.8717	90.95	3.9061	53.21	3.9222
105.55	4.0409	52.75	3.9516	107.42	4.0359	54.68	3.9577	103.86	4.0222	53.8	3.955	99.37	3.9265	52.5	3.9217	92.62	4.0185	52.32	3.8706	91.51	3.9073	53.38	3.9214
105.93	4.0416	52.93	3.9508	107.8	4.0365	55.03	3.9564	104.05	4.0225	54.07	3.954	100.12	3.9276	52.76	3.9206	92.81	4.0188	52.5	3.8698	91.89	3.9081	53.65	3.9203
106.68	4.0428	53.19	3.9498	108.55	4.0377	55.12	3.956	104.8	4.0236	54.24	3.9534	100.31	3.9279	52.94	3.9198	93.37	4.0199	52.76	3.8688	92.45	3.9092	53.82	3.9196
106.86	4.0432	53.36	3.9492	108.74	4.038	55.38	3.955	104.99	4.0241	54.5	3.9522	101.06	3.929	53.2	3.9187	93.75	4.0206	52.94	3.868	92.82	3.9098	54.08	3.9185
107.61	4.0443	53.63	3.9481	109.3	4.039	55.56	3.9543	105.74	4.0253	54.68	3.9516	101.25	3.9294	53.37	3.918	94.5	4.0219	53.2	3.867	93.39	3.911	54.26	3.9179
107.8	4.0446	53.8	3.9474	109.67	4.0395	55.91	3.9531	105.92	4.0256	54.94	3.9506	102	3.9305	53.64	3.9169	94.69	4.0223	53.37	3.8662	93.76	3.9118	54.52	3.9169
108.36	4.0456	54.06	3.9463	110.42	4.0407	55.99	3.9527	106.67	4.0267	55.12	3.95	102.19	3.9308	53.81	3.9161	95.25	4.0233	53.72	3.8648	94.51	3.9132	54.7	3.9161
108.74	4.0462	54.24	3.9456	110.61	4.0411	56.26	3.9516	106.86	4.027	55.38	3.949	102.93	3.932	54.07	3.915	95.62	4.024	53.81	3.8645	94.7	3.9136	54.96	3.915
109.49	4.0475	54.59	3.9443	111.36	4.0422	56.43	3.9511	107.61	4.0282	55.55	3.9482	103.12	3.9321	54.25	3.9143	96.37	4.0253	54.07	3.8635	95.45	3.915	55.13	3.9145
109.68	4.0477	54.68	3.944	111.55	4.0425	56.69	3.95	107.8	4.0285	55.82	3.9472	103.68	3.9331	54.51	3.9132	96.56	4.0256	54.25	3.8627	95.64	3.9153	55.4	3.9134
110.24	4.0487	54.94	3.9429	112.11	4.0435	56.87	3.9493	108.55	4.0298	55.99	3.9466	104.06	3.9336	54.69	3.9125	97.31	4.0269	54.51	3.8615	96.2	3.9163	55.57	3.9125
110.61	4.0493	55.11	3.9422	112.49	4.044	57.22	3.9481	108.73	4.0301	56.25	3.9456	104.81	3.9347	54.95	3.9114	97.5	4.0272	54.69	3.8609	96.57	3.9171	55.92	3.9111
111.36	4.0506	55.46	3.941	113.24	4.0453	57.31	3.9476	109.48	4.0312	56.43	3.945	105	3.935	55.12	3.9106	98.06	4.0282	54.95	3.8599	97.14	3.9181	56.01	3.9109
111.55	4.0508	55.55	3.9405	113.42	4.0456	57.57	3.9466	109.67	4.0315	56.69	3.9439	105.75	3.9361	55.39	3.9095	98.44	4.0288	55.12	3.8591	97.51	3.9187	56.27	3.9098
112.3	4.052	55.81	3.9395	114.17	4.0467	57.74	3.946	110.42	4.0327	56.87	3.9432	105.93	3.9363	55.56	3.9088	99	4.0298	55.47	3.8578	98.07	3.9198	56.45	3.9092
112.49	4.0524	55.99	3.9389	114.36	4.047	58.09	3.9447	110.61	4.033	57.13	3.9422	106.5	3.9373	55.82	3.9077	99.37	4.0304	55.56	3.8574	98.45	3.9205	56.71	3.908
113.24	4.0535	56.25	3.9379	115.11	4.0482	58.18	3.9443	111.17	4.034	57.3	3.9416	106.87	3.9379	56	3.9071	99.94	4.0314	55.82	3.8564	99.01	3.9215	56.88	3.9074
113.42	4.0538	56.43	3.9372	115.3	4.0485	58.53	3.943	111.55	4.0345	57.57	3.9405	107.62	3.9389	56.26	3.9059	100.31	4.0319	56	3.8556	99.39	3.9221	57.15	3.9063
113.99	4.0548	56.69	3.9361	116.05	4.0498	58.62	3.9427	112.3	4.0357	57.74	3.9398	107.81	3.9392	56.44	3.9051	101.06	4.0332	56.26	3.8546	99.95	3.9231	57.32	3.9056
114.36	4.0553	56.86	3.9355	116.23	4.0501	58.88	3.9416	112.48	4.0361	58.09	3.9385	108.56	3.9403	56.79	3.9037	101.25	4.0335	56.44	3.8538	100.33	3.9237	57.58	3.9045
115.11	4.0566	57.13	3.9343	116.98	4.0512	59.06	3.941	113.23	4.0372	58.18	3.9382	108.75	3.9407	56.87	3.9033	101.81	4.0345	56.7	3.8528	100.89	3.9248	57.76	3.9038
115.3	4.0569	57.3	3.9337	117.17	4.0514	59.32	3.94	113.42	4.0375	58.44	3.9371	109.5	3.9418	57.14	3.9022	102.19	4.0349	56.87	3.8522	101.26	3.9253	58.11	3.9024
115.86	4.0579	57.56	3.9327	117.73	4.0524	59.49	3.9393	114.17	4.0386	58.62	3.9364	109.68	3.942	57.31	3.9016	102.75	4.0359	57.14	3.8511	101.83	3.9263	58.2	3.9022
116.24	4.0583	57.74	3.9321	118.11	4.0529	59.84	3.938	114.36	4.039	58.97	3.9351	110.43	3.9433	57.57	3.9004	103.12	4.0365	57.31	3.8503	102.2	3.9269	58.46	3.9011
116.8	4.0593	58	3.9311	118.86	4.0541	59.93	3.9377	115.11	4.0401	59.05	3.9348	110.62	3.9434	57.75	3.8998	103.69	4.0375	57.66	3.849	102.76	3.9279	58.63	3.9004
117.17	4.0598	58.18	3.9303	119.05	4.0545	60.28	3.9364	115.3	4.0404	59.4	3.9335	111.37	3.9445	58.01	3.8987	104.06	4.038	57.75	3.8486	103.14	3.9286	58.9	3.8993
117.74	4.0608	58.44	3.9293	119.8	4.0556	60.37	3.9361	115.86	4.0414	59.49	3.9332	111.56	3.9449	58.19	3.8979	104.62	4.039	58.01	3.8475	103.89	3.9299	59.07	3.8987
118.11	4.0614	58.61	3.9287	119.98	4.0559	60.63	3.9351	116.23	4.0419	59.75	3.9322	112.31	3.946	58.45	3.8969	105	4.0396	58.19	3.8469	104.08	3.9302	59.33	3.8977
118.67	4.0624	58.88	3.9277	120.73	4.057	60.81	3.9345	116.98	4.043	59.93	3.9314	112.5	3.9463	58.62	3.8961	105.75	4.0407	58.45	3.8457	104.83	3.9313	59.51	3.8969
119.05	4.0629	59.05	3.9271	120.92	4.0574	61.07	3.9335	117.17	4.0433	60.28	3.9301	113.25	3.9474	58.89	3.8951	105.94	4.0411	58.62	3.8452	105.01	3.9316	59.77	3.8959
119.8	4.0642	59.31	3.9261	121.67	4.0585	61.24	3.9329	117.92	4.0445	60.37	3.9298	113.43	3.9476	59.06	3.8943	106.69	4.0422	58.89	3.8441	105.58	3.9326	59.95	3.8953
119.99	4.0645	59.49	3.9255	121.86	4.0588	61.51	3.9319	118.11	4.0448	60.63	3.9288	114.18	3.9487	59.32	3.8932	106.87	4.0425	59.06	3.8433	105.95	3.9332	60.21	3.8941
120.74	4.0656	59.75	3.9243	122.42	4.0598	61.68	3.9313	118.67	4.0458	60.8	3.9282	114.37	3.9491	59.5	3.8925	107.44	4.0435	59.32	3.8423	106.51	3.9342	60.38	3.8935
120.92	4.0659	59.93	3.9237	122.8	4.0603	61.94	3.9303	119.05	4.0462	61.07	3.9272	115.12	3.9502	59.76	3.8914	107.81	4.044	59.5	3.8417	106.89	3.9347	60.65	3.8925
121.67	4.0671	60.19	3.9227	123.55	4.0614	62.12	3.9297	119.61	4.0472	61.24	3.9266	115.31	3.9504	59.94	3.8908	108.56	4.0451	59.76	3.8406	107.45	3.9357	60.82	3.8917
121.86	4.0674	60.36	3.9221	123.73	4.0617	62.38	3.9285	119.98	4.0477	61.5	3.9256	116.06	3.9516	60.2	3.8896	108.75	4.0454	59.94	3.8399	107.83	3.9363	61.17	3.8904
122.61	4.0685	60.63	3.9211	124.48	4.0629	62.56	3.9279	120.55	4.0487	61.68	3.925	116.25	3.9518	60.37	3.889	109.31	4.0464	60.29	3.8386	108.58	3.9374	61.26	3.8901
122.8	4.0688	60.8	3.9205	124.67	4.0632	62.82	3.9269	120.92	4.0491	61.94	3.924	116.81	3.9528	60.64	3.8879	109.69	4.047	60.37	3.8381	108.76	3.9378	61.52	3.889
123.55	4.07	61.06	3.9193	125.23	4.0642	62.99	3.9263	121.48	4.0501	62.12	3.9234	117.18	3.9533	60.81	3.887	110.44	4.0482	60.72	3.8369	109.51	3.9389	61.7	3.8883
123.74	4.0703	61.24	3.9188	125.61	4.0646	63.26	3.9253	121.86	4.0508	62.38	3.9222	117.93	3.9544	61.16	3.8856	110.62	4.0485	60.81	3.8365	109.7	3.9392	61.96	3.8872
124.3	4.0713	61.5	3.9177	126.17	4.0656	63.43	3.9247	122.61	4.0519	62.55	3.9216	118.12	3.9547	61.25	3.8854	111.37	4.0496	61.16	3.8351	110.26	3.9402	62.13	3.8867
124.67	4.0717	61.68	3.9171	126.55	4.0661	63.78	3.9234	122.8	4.0522	62.9	3.9203	118.87	3.9558	61.51	3.8843	111.56	4.0499	61.25	3.8348	110.64	3.9407	62.4	3.8856
125.24	4.0727	61.94	3.9161	127.11	4.0671	63.87	3.923	123.55	4.0533	62.99	3.92	119.06	3.956	61.69	3.8835	112.31	4.0511	61.51	3.8338	111.39	3.942	62.57	3.885
125.61	4.0734	62.11	3.9155	127.48	4.0675	64.22	3.9217	123.73	4.0537	63.25	3.919	119.62	3.957	61.95	3.8825	112.5	4.0514	61.69	3.833	111.58	3.9423	62.83	3.884
126.36	4.0745	62.38	3.9143	128.05	4.0685	64.31	3.9214	124.48	4.0548	63.43	3.9184	120	3.9575	62.12	3.8817	113.25	4.0524	61.95	3.832	112.33	3.9434	63.01	3.8832
126.55	4.0748	62.55	3.9137	128.42	4.0692	64.66	3.9203	124.67	4.055	63.69	3.9174	120.75	3.9586	62.47	3.8804	113.44	4.0527	62.12	3.8314	112.51	3.9437	63.27	3.8822
127.3	4.0759	62.81	3.9127	129.36	4.0704	64.74	3.9198	125.42	4.0562	63.86	3.9167	120.93	3.9589	62.56	3.8801	114	4.0537	62.39	3.8304	113.26	3.9449	63.45	3.8814
127.49	4.0764	62.99	3.9122	129.92	4.0714	65.01	3.9188	125.61	4.0564	64.21	3.9155	121.68	3.96	62.82	3.879	114.37	4.0541	62.56	3.8296	113.45	3.9452	63.71	3.8804
128.24	4.0775	63.25	3.9111	130.3	4.0719	65.18	3.9182	126.17	4.0574	64.3	3.9151	121.87	3.9604	63	3.8783	115.12	4.0553	62.82	3.8285	114.2	3.9463	63.89	3.8798
128.42	4.0779	63.43	3.9105	130.86	4.0729	65.44	3.9172	126.54	4.058	64.65	3.9138	122.81	3.9617	63.26	3.8772	115.31	4.0556	63	3.828	114.39	3.9466	64.15	3.8788
129.17	4.079	63.69	3.9095	131.23	4.0734	65.62	3.9166	127.29	4.0591	64.74	3.9135	123.56	3.9628	63.44	3.8766	116.06	4.0567	63.26	3.8269	115.14	3.9478	64.32	3.8782
129.36	4.0793	63.86	3.9088	131.98	4.0746	65.97	3.9153	127.48	4.0593	65	3.9125	123.75	3.9631	63.7	3.8754	116.25	4.057	63.44	3.8262	115.33	3.9479	64.59	3.877
130.11	4.0805	64.21	3.9075	132.17	4.075	66.06	3.9151	128.04	4.0603	65.18	3.9119	124.5	3.9642	63.87	3.8748	117	4.0582	63.7	3.8252	115.89	3.9489	64.76	3.8764
130.3	4.0808	64.3	3.9072	132.92	4.0761	66.32	3.914	128.42	4.0608	65.44	3.9109	124.68	3.9646	64.14	3.8737	117.19	4.0585	63.87	3.8246	116.26	3.9495	65.02	3.8754
131.05	4.0819	64.65	3.9059	133.11	4.0764	66.49	3.9134	129.17	4.0621	65.61	3.9103	125.43	3.9657	64.31	3.873	117.94	4.0596	64.14	3.8235	117.01	3.9505	65.2	3.8748
131.24	4.0822	64.74	3.9056	133.86	4.0775	66.84	3.9122	129.36	4.0624	65.88	3.9093	125.62	3.966	64.57	3.872	118.12	4.06	64.31	3.8228	117.2	3.9508	65.46	3.8738
131.99	4.0834	65	3.9046	134.05	4.0777	66.93	3.9119	130.11	4.0635	66.05	3.9087	126.37	3.9671	64.75	3.8712	118.87	4.0611	64.57	3.8218	117.76	3.9518	65.64	3.873
132.17	4.0837	65.18	3.904	134.61	4.0787	67.19	3.9109	130.29	4.0637	66.4	3.9075	126.56	3.9675	65.01	3.8701	119.06	4.0614	64.75	3.8212	118.14	3.9523	65.99	3.8717
132.74	4.0847	65.44	3.903	134.98	4.0793	67.37	3.9103	131.04	4.0648	66.49	3.9071	127.31	3.9686	65.19	3.8695	119.81	4.0624	65.01	3.8202	118.7	3.9533	66.07	3.8714
133.11	4.0853	65.61	3.9024	135.73	4.0805	67.63	3.9093	131.23	4.0651	66.75	3.9061	127.5	3.9688	65.45	3.8685	120	4.0627	65.19	3.8194	119.08	3.9537	66.34	3.8703
133.86	4.0864	65.87	3.9014	135.92	4.0806	67.81	3.9087	131.98	4.0663	66.93	3.9054	128.25	3.9699	65.62	3.8677	120.75	4.0638	65.54	3.8181	119.64	3.9547	66.51	3.8696
134.05	4.0866	66.05	3.9008	136.48	4.0816	68.07	3.9077	132.17	4.0666	67.28	3.9042	128.43	3.9702	65.89	3.8667	120.94	4.064	65.62	3.8178	120.02	3.9552	66.86	3.8683
134.61	4.0876	66.31	3.8998	136.86	4.0821	68.24	3.9071	132.92	4.0677	67.36	3.9038	129	3.9712	66.06	3.8661	121.5	4.065	65.89	3.8168	120.77	3.9563	66.95	3.868
134.99	4.0882	66.49	3.8992	137.61	4.0834	68.51	3.9061	133.11	4.068	67.71	3.9027	129.37	3.9717	66.32	3.8649	121.87	4.0654	66.06	3.8162	120.95	3.9566	67.21	3.867
135.73	4.0893	66.75	3.8982	137.79	4.0835	68.68	3.9054	133.86	4.0692	67.8	3.9022	130.12	3.9728	66.5	3.8643	122.44	4.0664	66.32	3.8151	121.7	3.9576	67.39	3.8662
135.92	4.0897	66.92	3.8975	138.36	4.0845	69.03	3.9043	134.04	4.0695	68.15	3.9011	130.31	3.9731	66.76	3.8632	122.81	4.0669	66.5	3.8144	121.89	3.9579	67.74	3.8649
136.67	4.0908	67.27	3.8962	138.73	4.085	69.12	3.9038	134.79	4.0706	68.24	3.9008	131.06	3.9742	66.94	3.8625	123.37	4.0679	66.85	3.8131	122.45	3.9589	67.82	3.8646
136.86	4.0911	67.36	3.8959	139.48	4.0863	69.47	3.9027	134.98	4.0708	68.5	3.8998	131.25	3.9746	67.2	3.8615	123.75	4.0683	66.94	3.8128	122.83	3.9594	68.09	3.8636
137.61	4.0922	67.71	3.8946	139.67	4.0866	69.56	3.9024	135.73	4.0721	68.68	3.8992	132	3.9757	67.37	3.8607	124.31	4.0693	67.2	3.8117	123.39	3.9604	68.26	3.863
137.8	4.0926	67.8	3.8943	140.42	4.0877	69.82	3.9014	135.92	4.0722	68.94	3.8982	132.18	3.976	67.72	3.8595	124.69	4.0698	67.37	3.811	123.77	3.9608	68.52	3.862
138.55	4.0937	68.15	3.893	140.61	4.088	69.99	3.9008	136.48	4.0732	69.11	3.8975	132.93	3.9771	67.81	3.8591	125.44	4.0709	67.72	3.8097	124.33	3.9618	68.7	3.8612
138.73	4.094	68.24	3.8927	141.36	4.0892	70.26	3.8998	136.86	4.0738	69.46	3.8962	133.12	3.9775	68.16	3.8577	125.62	4.0713	67.81	3.8094	124.7	3.9623	69.05	3.8599
139.3	4.095	68.5	3.8917	141.54	4.0893	70.43	3.8992	137.61	4.075	69.55	3.8959	133.87	3.9786	68.25	3.8574	126.56	4.0727	68.16	3.8081	125.45	3.9634	69.14	3.8596
139.67	4.0955	68.67	3.8911	142.11	4.0903	70.69	3.8982	137.79	4.0751	69.9	3.8948	134.06	3.9789	68.51	3.8564	127.31	4.0737	68.25	3.8078	125.64	3.9638	69.4	3.8586
140.42	4.0966	68.94	3.8901	142.48	4.0909	70.87	3.8977	138.36	4.0761	69.99	3.8943	134.81	3.9801	68.69	3.8556	127.5	4.074	68.51	3.8068	126.39	3.9649	69.57	3.858
140.61	4.0971	69.11	3.8896	143.23	4.0921	71.13	3.8967	138.73	4.0766	70.34	3.8932	135	3.9804	68.95	3.8546	128.06	4.075	68.69	3.8062	126.58	3.9652	69.84	3.857
141.36	4.0982	69.46	3.8883	143.42	4.0922	71.31	3.8961	139.48	4.0779	70.43	3.8929	135.75	3.9815	69.12	3.854	128.44	4.0755	68.95	3.8052	127.33	3.9662	70.01	3.8562
141.55	4.0985	69.55	3.888	143.98	4.0932	71.57	3.8951	139.67	4.078	70.69	3.8919	135.93	3.9818	69.39	3.8528	129.19	4.0767	69.12	3.8044	127.52	3.9665	70.36	3.8549
142.3	4.0997	69.81	3.887	144.36	4.0937	71.74	3.8945	140.23	4.079	70.86	3.8912	136.68	3.983	69.56	3.8522	129.37	4.0769	69.47	3.8031	128.08	3.9675	70.45	3.8546
142.48	4.1	69.99	3.8864	144.92	4.0947	72.09	3.8933	140.61	4.0795	71.21	3.89	136.87	3.9833	69.82	3.8512	130.12	4.078	69.56	3.8028	128.45	3.9679	70.71	3.8536
142.48	4.0998	70.25	3.8854	145.29	4.0953	72.18	3.893	141.17	4.0805	71.3	3.8896	137.43	3.9843	70	3.8506	130.31	4.0784	69.82	3.8018	129.02	3.9689	70.89	3.853
142.67	4.0998	70.42	3.8848	146.04	4.0964	72.53	3.8917	141.54	4.0809	71.65	3.8883	137.81	3.9847	70.26	3.8496	131.06	4.0795	70	3.8012	129.39	3.9694	71.15	3.852
143.41	4.0998	70.69	3.8838	146.23	4.0966	72.62	3.8914	142.29	4.0821	71.74	3.888	138.56	3.986	70.44	3.8488	131.25	4.0796	70.26	3.8002	130.14	3.9705	71.32	3.8514
144.33	4.0998	70.86	3.8833	146.79	4.0976	72.88	3.8904	142.48	4.0824	72.09	3.8869	138.75	3.9863	70.7	3.8478	131.81	4.0806	70.44	3.7996	130.33	3.9709	71.59	3.8504
145.25	4.0998	71.12	3.8822	147.17	4.0982	73.06	3.8898	143.23	4.0835	72.18	3.8866	139.5	3.9875	70.87	3.847	132.19	4.0811	70.7	3.7986	131.08	3.972	71.76	3.8498
146.15	4.0998	71.3	3.8817	147.92	4.0993	73.32	3.8888	143.42	4.0838	72.44	3.8856	139.68	3.9878	71.22	3.8457	132.94	4.0822	70.87	3.798	131.27	3.9723	72.02	3.8488
147.06	4.1	71.65	3.8803	148.11	4.0995	73.49	3.8882	143.98	4.0848	72.61	3.885	140.43	3.9889	71.31	3.8454	133.12	4.0827	71.14	3.797	132.02	3.9734	72.2	3.8482
147.95	4.0998	71.74	3.8801	148.48	4.1003	73.84	3.887	144.35	4.0853	72.88	3.884	140.62	3.9893	71.57	3.8444	133.87	4.0837	71.31	3.7962	132.2	3.9738	72.46	3.847
148.84	4.0998	72	3.8791	148.48	4.0997	73.93	3.8867	145.1	4.0864	73.05	3.8833	141.37	3.9904	71.75	3.8436	134.06	4.084	71.57	3.7952	132.95	3.9749	72.64	3.8465
149.72	4.0998	72.17	3.8785	148.67	4.0997	74.28	3.8854	145.29	4.0867	73.4	3.882	141.56	3.9907	72.1	3.8423	134.81	4.0851	71.75	3.7946	133.14	3.9752	72.9	3.8454
150.6	4.0998	72.44	3.8775	149.41	4.0998	74.37	3.8853	146.04	4.0879	73.49	3.8819	142.12	3.9917	72.19	3.842	135	4.0855	72.01	3.7936	133.89	3.9763	73.07	3.8448
151.47	4.0998	72.61	3.8769	150.33	4.0998	74.63	3.8841	146.23	4.0882	73.75	3.8809	142.5	3.9922	72.54	3.8407	135.75	4.0866	72.19	3.793	134.08	3.9765	73.34	3.8438
152.34	4.0998	72.87	3.8759	151.24	4.0998	74.81	3.8837	146.98	4.0893	73.93	3.8803	143.25	3.9935	72.62	3.8402	135.94	4.0869	72.45	3.792	134.64	3.9775	73.51	3.8432
153.2	4.0998	73.05	3.8754	152.15	4.0997	75.07	3.8827	147.17	4.0895	74.19	3.8793	143.43	3.9938	72.97	3.839	136.69	4.088	72.62	3.7913	135.02	3.9781	73.77	3.8422
154.06	4.0998	73.4	3.8741	153.05	4.0998	75.24	3.8822	147.73	4.0905	74.36	3.8788	144.18	3.9951	73.06	3.8386	136.87	4.0884	72.97	3.7901	135.77	3.9792	73.95	3.8415
154.91	4.0998	73.49	3.8738	153.94	4.0997	75.51	3.8811	148.1	4.0909	74.63	3.8778	144.37	3.9952	73.41	3.8373	137.62	4.0895	73.06	3.7897	135.95	3.9796	74.3	3.8402
155.76	4.0998	73.75	3.8728	154.83	4.0997	75.68	3.8806	148.67	4.0919	74.8	3.8772	144.93	3.9962	73.5	3.837	137.81	4.0898	73.41	3.7884	136.7	3.9807	74.39	3.8399
156.6	4.0998	73.92	3.8722	155.71	4.0997	75.94	3.8796	149.04	4.0924	75.06	3.8762	145.31	3.9968	73.76	3.8359	138.56	4.0909	73.5	3.7881	136.89	3.9809	74.74	3.8386
157.44	4.0998	74.19	3.8712	156.59	4.0997	76.12	3.879	149.6	4.0934	75.24	3.8756	146.06	3.998	73.94	3.8352	138.75	4.0913	73.76	3.7871	137.64	3.9822	74.82	3.8383
158.27	4.0998	74.36	3.8707	157.46	4.0997	76.38	3.878	149.98	4.0939	75.59	3.8743	146.25	3.9983	74.29	3.834	139.5	4.0924	73.94	3.7865	137.83	3.9825	75.09	3.8373
159.1	4.0998	74.71	3.8695	158.33	4.0998	76.55	3.8774	150.73	4.0951	75.68	3.8741	146.81	3.9993	74.37	3.8336	139.69	4.0926	74.2	3.7855	138.58	3.9836	75.26	3.8367
159.92	4.0998	74.8	3.8691	159.19	4.0997	76.9	3.8762	150.92	4.0953	76.03	3.8728	147.18	3.9999	74.64	3.8325	140.44	4.0939	74.37	3.7849	138.77	3.9839	75.52	3.8357
160.74	4.0998	75.15	3.8678	160.05	4.0997	76.99	3.8759	151.48	4.0963	76.11	3.8725	147.93	4.001	74.81	3.8319	140.62	4.0942	74.64	3.7838	139.52	3.9851	75.7	3.8351
161.56	4.0998	75.24	3.8675	160.9	4.0998	77.25	3.8749	151.85	4.0968	76.46	3.8712	148.12	4.0014	75.07	3.8309	141.37	4.0953	74.81	3.7833	139.71	3.9854	75.96	3.8341
162.37	4.0998	75.59	3.8664	161.74	4.0997	77.43	3.8745	152.6	4.0979	76.55	3.8711	148.87	4.0027	75.25	3.8302	141.56	4.0956	75.07	3.7823	140.46	3.9865	76.14	3.8335
163.18	4.0998	75.67	3.8661	162.59	4.0998	77.69	3.8735	152.79	4.0982	76.81	3.8701	149.06	4.003	75.6	3.8288	142.31	4.0968	75.25	3.7815	140.64	3.9868	76.4	3.8325
163.98	4.0998	75.94	3.8651	163.42	4.0997	77.87	3.8728	153.35	4.0992	76.99	3.8695	149.81	4.0041	75.69	3.8285	142.5	4.0971	75.6	3.7802	141.39	3.988	76.57	3.8317
164.78	4.0998	76.11	3.8645	164.25	4.0997	78.22	3.8717	153.73	4.0997	77.25	3.8685	150	4.0044	75.95	3.8275	143.25	4.0982	75.69	3.7799	141.58	3.9883	76.92	3.8304
165.57	4.0998	76.46	3.8633	165.08	4.0998	78.3	3.8714	153.92	4.1	77.43	3.8678	150.56	4.0054	76.12	3.8269	143.44	4.0985	75.95	3.7789	142.14	3.9893	77.01	3.8302
166.36	4.0998	76.55	3.863	165.91	4.0997	78.57	3.8704	153.92	4.0998	77.78	3.8667	150.93	4.006	76.39	3.8259	144.19	4.0998	76.12	3.7783	142.52	3.9899	77.27	3.8291
167.14	4.0998	76.81	3.862	166.72	4.0997	78.74	3.8698	154.11	4.0998	77.86	3.8664	151.5	4.007	76.56	3.8252	144.37	4.1	76.39	3.7773	143.27	3.991	77.45	3.8285
167.92	4.0998	76.99	3.8614	167.54	4.0997	79.09	3.8687	154.85	4.0997	78.13	3.8654	151.87	4.0075	76.91	3.8238	144.37	4.0998	76.56	3.7768	143.46	3.9912	77.71	3.8275
168.7	4.0998	77.25	3.8604	168.35	4.0997	79.18	3.8683	155.77	4.0998	78.3	3.8648	152.43	4.0086	77	3.8235	144.56	4.0998	76.82	3.7757	144.02	3.9922	77.89	3.8269
169.48	4.0998	77.42	3.8599	169.15	4.0997	79.53	3.8672	156.69	4.0998	78.65	3.8636	152.81	4.0093	77.35	3.8222	145.31	4.1001	77	3.775	144.39	3.9928	78.15	3.8259
170.24	4.0998	77.77	3.8586	169.96	4.0998	79.62	3.8669	157.59	4.0998	78.74	3.8633	153.56	4.0104	77.44	3.8218	146.24	4.1001	77.35	3.7739	145.14	3.9941	78.33	3.8254
171.01	4.0998	77.86	3.8583	170.75	4.0997	79.88	3.8659	158.49	4.0997	79.09	3.8622	153.75	4.0107	77.79	3.8206	147.16	4.1001	77.44	3.7734	145.33	3.9943	78.59	3.8244
171.77	4.0998	78.21	3.8572	171.55	4.0997	80.05	3.8653	159.39	4.0997	79.18	3.8619	154.31	4.0117	77.87	3.8202	148.08	4.1001	77.79	3.7723	146.08	3.9955	78.76	3.8238
172.53	4.0998	78.3	3.8567	172.34	4.0998	80.32	3.8643	160.28	4.0998	79.44	3.8609	154.68	4.0123	78.14	3.8191	149	4.1001	77.87	3.772	146.27	3.9959	79.03	3.8227
173.28	4.0998	78.65	3.8556	173.12	4.0997	80.49	3.8638	161.16	4.0998	79.61	3.8603	155.25	4.0133	78.31	3.8186	149.91	4.1001	78.14	3.771	147.02	3.9972	79.2	3.822
174.03	4.0998	78.74	3.8553	173.9	4.0997	80.75	3.8628	162.04	4.0997	79.96	3.8591	155.62	4.014	78.66	3.8172	150.82	4.1001	78.31	3.7704	147.21	3.9973	79.46	3.821
174.78	4.0998	79	3.8543	174.68	4.0997	80.93	3.8622	162.92	4.0998	80.05	3.8588	156.37	4.0152	78.75	3.8168	151.72	4.1001	78.57	3.7694	147.77	3.9983	79.64	3.8204
175.52	4.0998	79.17	3.8538	175.45	4.0997	81.28	3.8611	163.78	4.0997	80.31	3.8578	156.56	4.0156	79.1	3.8156	152.62	4.1001	78.75	3.7688	148.14	3.9988	79.9	3.8194
176.26	4.0998	79.43	3.8528	176.22	4.0997	81.37	3.8607	164.65	4.0997	80.49	3.8572	157.31	4.0167	79.19	3.8152	153.52	4.1001	79.01	3.7678	148.89	4.0001	80.08	3.8188
177	4.0998	79.61	3.8522	176.98	4.0997	81.72	3.8596	165.5	4.0997	80.84	3.8561	157.5	4.017	79.54	3.8139	154.41	4.1001	79.19	3.7671	149.08	4.0004	80.34	3.8178
177.73	4.0998	79.87	3.8512	177.75	4.0997	81.8	3.8593	166.36	4.0998	80.92	3.8557	158.06	4.018	79.62	3.8136	155.3	4.1001	79.54	3.7658	149.64	4.0014	80.51	3.8172
178.46	4.0998	80.05	3.8507	178.5	4.0997	82.07	3.8583	167.21	4.0997	81.27	3.8546	158.43	4.0188	79.89	3.8125	156.18	4.1001	79.62	3.7655	150.02	4.002	80.78	3.8162
179.18	4.0998	80.4	3.8494	179.26	4.0997	82.24	3.8578	168.05	4.0998	81.36	3.8543	159.18	4.0201	80.06	3.812	157.07	4.1001	79.97	3.7642	150.77	4.0031	80.95	3.8156
179.91	4.0998	80.48	3.8493	180.01	4.0997	82.59	3.8565	168.89	4.0998	81.62	3.8533	159.37	4.0204	80.32	3.811	157.94	4.1001	80.06	3.7639	150.96	4.0035	81.3	3.8144
180.62	4.0998	80.75	3.8483	180.75	4.0997	82.68	3.8562	169.72	4.0998	81.8	3.8528	160.12	4.0215	80.5	3.8102	158.82	4.1001	80.32	3.7629	151.71	4.0048	81.39	3.8139
181.34	4.0998	80.92	3.8477	181.5	4.0997	83.03	3.8551	170.55	4.0997	82.15	3.8515	160.31	4.022	80.85	3.8089	159.68	4.1001	80.5	3.7623	151.89	4.0051	81.74	3.8128
182.05	4.0998	81.18	3.8467	182.24	4.0998	83.12	3.8548	171.38	4.0997	82.24	3.8512	160.87	4.023	80.94	3.8086	160.55	4.1001	80.76	3.7613	152.64	4.0064	81.83	3.8125
182.76	4.0998	81.36	3.8462	182.97	4.0998	83.38	3.8538	172.2	4.0997	82.59	3.8501	161.25	4.0236	81.2	3.8076	161.41	4.1001	80.94	3.7607	152.83	4.0067	82.09	3.8115
183.46	4.0998	81.62	3.8452	183.7	4.0998	83.55	3.8533	173.01	4.0998	82.67	3.8498	161.81	4.0246	81.37	3.807	162.27	4.1003	81.2	3.7597	153.39	4.0077	82.26	3.8107
184.16	4.0998	81.8	3.8446	184.43	4.0998	83.9	3.852	173.83	4.0998	82.94	3.8488	162.18	4.0253	81.64	3.806	163.13	4.1001	81.37	3.7591	153.77	4.0083	82.61	3.8096
184.86	4.0998	82.15	3.8435	185.16	4.0998	83.99	3.8519	174.63	4.0998	83.11	3.8483	162.93	4.0265	81.81	3.8054	163.98	4.1001	81.64	3.7581	154.52	4.0096	82.7	3.8091
185.56	4.0998	82.23	3.8432	185.88	4.0998	84.25	3.8509	175.44	4.0998	83.37	3.8473	163.12	4.0269	82.07	3.8044	164.82	4.1001	81.81	3.7575	154.71	4.0098	83.05	3.808
186.25	4.0998	82.5	3.8422	186.6	4.0997	84.43	3.8503	176.24	4.0997	83.55	3.8467	163.87	4.0282	82.25	3.8038	165.67	4.1001	82.07	3.7565	155.46	4.0112	83.14	3.8076
186.94	4.0998	82.67	3.8415	187.31	4.0998	84.78	3.8491	177.03	4.0997	83.9	3.8456	164.06	4.0285	82.51	3.8028	166.51	4.1001	82.25	3.7558	155.64	4.0115	83.49	3.8064
187.62	4.0998	83.02	3.8404	188.02	4.0997	84.87	3.8488	177.82	4.0997	83.99	3.8452	164.81	4.0298	82.69	3.8022	167.34	4.1001	82.6	3.7545	156.21	4.0125	83.58	3.806
188.31	4.0998	83.11	3.8401	188.73	4.0997	85.22	3.8477	178.61	4.0997	84.34	3.8441	165	4.0301	82.95	3.8012	168.18	4.1001	82.69	3.7544	156.58	4.013	83.93	3.8047
188.98	4.0998	83.37	3.8391	189.43	4.0997	85.3	3.8473	179.39	4.0998	84.42	3.8438	165.56	4.0312	83.12	3.8005	169.01	4.1001	82.95	3.7534	157.14	4.014	84.01	3.8044
189.66	4.0998	83.55	3.8386	190.14	4.0998	85.65	3.8462	180.17	4.0997	84.69	3.8428	165.93	4.0319	83.39	3.7994	169.83	4.1003	83.12	3.7528	157.52	4.0146	84.36	3.8031
190.33	4.0998	83.9	3.8373	190.83	4.0997	85.74	3.8459	180.95	4.0998	84.86	3.8423	166.68	4.0332	83.56	3.7989	170.65	4.1001	83.39	3.7518	158.08	4.0156	84.45	3.8028
191	4.0998	83.98	3.8372	191.53	4.0998	86	3.8449	181.72	4.0998	85.21	3.8411	166.87	4.0335	83.82	3.7978	171.47	4.1001	83.56	3.7512	158.46	4.0162	84.71	3.8018
191.67	4.0998	84.25	3.8362	192.22	4.0998	86.18	3.8444	182.49	4.0998	85.3	3.8407	167.43	4.0345	84	3.7972	172.29	4.1001	83.82	3.7502	159.02	4.0172	84.89	3.8012
192.33	4.0998	84.42	3.8356	192.91	4.0997	86.53	3.8433	183.25	4.0997	85.65	3.8396	167.81	4.0351	84.26	3.7962	173.1	4.1001	84	3.7495	159.4	4.0178	85.24	3.8001
192.99	4.0998	84.77	3.8344	193.59	4.0997	86.62	3.8428	184.01	4.0998	85.74	3.8393	168.37	4.0361	84.44	3.7955	173.91	4.1001	84.35	3.7483	159.96	4.0188	85.33	3.7997
193.65	4.0998	84.86	3.8341	194.28	4.0998	86.97	3.8417	184.77	4.0998	86	3.8383	168.75	4.0369	84.79	3.7944	174.71	4.1001	84.44	3.7479	160.33	4.0196	85.68	3.7984
194.31	4.0998	85.12	3.8331	194.95	4.0997	87.05	3.8414	185.52	4.0997	86.17	3.8378	169.5	4.0382	84.87	3.7939	175.51	4.1001	84.79	3.7468	160.9	4.0206	85.76	3.7981
194.96	4.0998	85.3	3.8325	195.63	4.0997	87.4	3.8402	186.27	4.0997	86.52	3.8367	169.68	4.0385	85.22	3.7926	176.31	4.1001	84.87	3.7463	161.27	4.0212	86.11	3.7968
195.61	4.0998	85.65	3.8314	196.3	4.0997	87.49	3.8399	187.01	4.0998	86.61	3.8364	170.25	4.0395	85.31	3.7923	177.1	4.1001	85.22	3.745	161.83	4.0222	86.2	3.7965
196.25	4.0998	85.73	3.831	196.97	4.0998	87.84	3.8388	187.75	4.0998	86.96	3.8351	170.62	4.0401	85.57	3.7913	177.89	4.1001	85.31	3.7449	162.21	4.0228	86.46	3.7955
196.9	4.0998	86.08	3.8299	197.64	4.0998	87.93	3.8385	188.49	4.0997	87.05	3.8349	171.18	4.0412	85.75	3.7907	178.68	4.1001	85.57	3.7439	162.77	4.024	86.64	3.7949
197.54	4.0998	86.17	3.8296	198.3	4.0998	88.28	3.8373	189.22	4.0998	87.4	3.8336	171.56	4.0419	86.1	3.7894	179.46	4.1001	85.75	3.7433	163.15	4.0246	86.9	3.7939
198.18	4.0998	86.43	3.8286	198.96	4.0998	88.37	3.837	189.95	4.0997	87.49	3.8333	172.12	4.043	86.19	3.7891	180.24	4.1001	86.01	3.7423	163.71	4.0256	87.08	3.7933
198.81	4.0998	86.61	3.828	199.62	4.0997	88.72	3.8359	190.68	4.0997	87.84	3.8322	172.5	4.0437	86.45	3.7881	181.02	4.1001	86.19	3.7416	164.08	4.0262	87.34	3.7923
199.44	4.0998	86.96	3.827	200.28	4.0997	88.8	3.8356	191.4	4.0998	87.92	3.8319	173.25	4.0449	86.62	3.7876	181.79	4.1001	86.54	3.7405	164.65	4.0272	87.51	3.7917
200.07	4.0998	87.05	3.8265	200.93	4.0997	89.15	3.8344	192.12	4.0997	88.27	3.8307	173.43	4.0454	86.89	3.7865	182.56	4.1001	86.62	3.7402	165.02	4.028	87.78	3.7907
200.7	4.0998	87.4	3.8254	201.58	4.0998	89.24	3.8341	192.84	4.0997	88.36	3.8304	174	4.0464	87.06	3.7859	183.32	4.1001	86.89	3.7392	165.58	4.029	87.95	3.7901
201.32	4.0998	87.48	3.8251	202.22	4.0997	89.5	3.8331	193.55	4.0997	88.62	3.8294	174.37	4.047	87.32	3.7849	184.09	4.1001	86.97	3.7381	165.96	4.0298	88.3	3.7889
201.94	4.0998	87.83	3.8239	202.87	4.0998	89.68	3.8327	194.26	4.0998	88.8	3.8289	174.93	4.048	87.5	3.7842	184.84	4.1001	87.06	3.7373	166.71	4.0311	88.39	3.7886
202.56	4.0998	87.92	3.8236	203.51	4.0998	89.94	3.8317	194.97	4.0998	89.15	3.8277	175.31	4.0488	87.85	3.7831	185.6	4.1001	87.41	3.7358	166.9	4.0314	88.65	3.7876
203.18	4.0998	88.27	3.8225	204.14	4.0997	90.12	3.831	195.67	4.0997	89.24	3.8275	175.87	4.0498	87.94	3.7826	186.35	4.1003	87.5	3.7349	167.46	4.0324	88.83	3.787
203.79	4.0998	88.36	3.8222	204.78	4.0997	90.47	3.8299	196.37	4.0997	89.5	3.8265	176.25	4.0506	88.29	3.7815	187.1	4.1001	87.59	3.7363	167.83	4.0332	89.09	3.786
204.4	4.0998	88.62	3.8212	205.41	4.0997	90.55	3.8298	197.06	4.0998	89.67	3.826	176.81	4.0516	88.37	3.7812	187.84	4.1001	87.94	3.7352	168.58	4.0345	89.26	3.7854
205.01	4.0998	88.8	3.8207	206.04	4.0998	90.82	3.8288	197.76	4.0997	90.02	3.8248	177.18	4.0522	88.64	3.7802	188.59	4.1001	88.2	3.7342	168.77	4.0348	89.53	3.7844
205.61	4.0997	89.06	3.8197	206.66	4.0997	90.99	3.8281	198.45	4.0998	90.11	3.8246	177.75	4.0533	88.81	3.7796	189.32	4.1001	88.37	3.7337	169.33	4.0359	89.7	3.7838
206.22	4.0998	89.23	3.8193	207.29	4.0997	91.43	3.8267	199.13	4.0998	90.37	3.8236	178.12	4.054	89.07	3.7786	190.06	4.1003	88.72	3.7324	169.71	4.0365	89.96	3.7828
206.81	4.0998	89.5	3.8183	207.91	4.0998	91.78	3.8256	199.81	4.0997	90.55	3.8231	178.68	4.055	89.25	3.778	190.79	4.1001	88.81	3.7321	170.27	4.0377	90.14	3.7821
207.41	4.0998	89.67	3.8177	208.53	4.0998	91.87	3.8252	200.49	4.0998	90.9	3.8218	179.06	4.0558	89.51	3.777	191.52	4.1001	89.16	3.731	170.65	4.0383	90.49	3.781
208.01	4.0998	90.02	3.8165	209.14	4.0998	92.22	3.8241	201.17	4.0998	90.99	3.8215	179.62	4.0569	89.69	3.7763	192.24	4.1001	89.25	3.7307	171.21	4.0395	90.58	3.7807
208.6	4.0998	90.11	3.8162	209.75	4.0998	92.3	3.8239	201.84	4.0997	91.34	3.8204	180	4.0575	90.04	3.775	192.96	4.1001	89.51	3.7297	171.58	4.0401	90.84	3.7797
209.19	4.0998	90.46	3.8151	210.36	4.0997	92.65	3.8227	202.51	4.0998	91.42	3.8201	180.56	4.0587	90.12	3.7747	193.68	4.1001	89.69	3.7292	172.15	4.0412	91.01	3.7791
209.78	4.0998	90.55	3.8147	210.97	4.0998	92.74	3.8223	203.18	4.0998	91.77	3.8189	180.93	4.0593	90.47	3.7734	194.4	4.1001	89.95	3.7282	172.52	4.0419	91.28	3.7781
210.36	4.0998	90.9	3.8136	211.58	4.0998	93.09	3.8212	203.84	4.0998	91.86	3.8186	181.5	4.0603	90.56	3.7731	195.11	4.1001	90.12	3.7276	173.08	4.043	91.45	3.7775
210.94	4.0998	90.98	3.8133	212.18	4.0998	93.18	3.8209	204.51	4.0998	92.21	3.8175	181.87	4.0611	90.82	3.7721	195.81	4.1001	90.39	3.7265	173.46	4.0438	91.71	3.7765
211.52	4.0998	91.25	3.8123	212.78	4.0998	93.53	3.8197	205.16	4.0998	92.3	3.8172	182.43	4.0621	91	3.7717	196.52	4.1001	90.56	3.7261	174.02	4.0448	91.89	3.7759
212.1	4.0998	91.42	3.8117	213.37	4.0997	93.62	3.8194	205.82	4.0998	92.65	3.816	182.81	4.0629	91.26	3.7705	197.22	4.1001	90.91	3.7249	174.4	4.0456	92.15	3.7749
212.67	4.0998	91.77	3.8106	213.97	4.0998	93.97	3.8183	206.47	4.0997	92.74	3.8157	183.56	4.0643	91.44	3.77	197.92	4.1001	91	3.7245	174.96	4.0467	92.33	3.7742
213.24	4.0998	91.86	3.8104	214.56	4.0998	94.05	3.818	207.12	4.0997	93	3.8147	183.75	4.0646	91.79	3.7688	198.61	4.1001	91.35	3.7234	175.33	4.0474	92.68	3.7731
213.81	4.0998	92.12	3.8094	215.15	4.0997	94.4	3.8168	207.76	4.0998	93.17	3.8143	184.31	4.0658	91.87	3.7684	199.3	4.1001	91.44	3.7231	175.9	4.0485	92.76	3.7726
214.38	4.0998	92.3	3.8088	215.73	4.0997	94.49	3.8165	208.41	4.0998	93.52	3.813	184.68	4.0664	92.22	3.7671	199.99	4.1001	91.7	3.7221	176.27	4.0493	93.12	3.7715
214.95	4.0998	92.65	3.8076	216.32	4.0997	94.84	3.8154	209.05	4.0997	93.61	3.8128	185.25	4.0674	92.31	3.7668	200.67	4.1001	91.87	3.7215	176.83	4.0503	93.2	3.7712
215.51	4.0998	92.73	3.8073	216.9	4.0998	94.93	3.8152	209.68	4.0998	93.96	3.8117	185.62	4.0682	92.66	3.7655	201.35	4.1001	92.22	3.7203	177.21	4.0511	93.47	3.7702
216.07	4.0998	93.08	3.8062	217.48	4.0997	95.28	3.8139	210.32	4.0998	94.05	3.8114	186.18	4.0692	92.75	3.7654	202.03	4.1001	92.31	3.72	177.77	4.0522	93.64	3.7696
216.63	4.0998	93.17	3.8059	218.05	4.0998	95.37	3.8136	210.95	4.0997	94.31	3.8104	186.56	4.07	93.01	3.7642	202.71	4.1001	92.57	3.719	178.15	4.0529	93.99	3.7683
217.18	4.0998	93.52	3.8047	218.63	4.0997	95.72	3.8125	211.58	4.0997	94.49	3.8099	187.12	4.0711	93.19	3.7637	203.38	4.1001	92.75	3.7184	178.71	4.054	94.08	3.7679
217.73	4.0998	93.61	3.8044	219.2	4.0997	95.8	3.8122	212.2	4.0997	94.84	3.8088	187.5	4.0717	93.45	3.7626	204.05	4.1003	93.1	3.7173	179.09	4.0548	94.43	3.7667
218.28	4.0998	93.96	3.8033	219.77	4.0998	96.15	3.811	212.82	4.0997	94.92	3.8085	188.06	4.0729	93.62	3.7621	204.71	4.1001	93.19	3.7169	179.65	4.0559	94.52	3.7665
218.83	4.0998	94.04	3.803	220.33	4.0998	96.24	3.8107	213.44	4.0998	95.19	3.8075	188.43	4.0735	93.97	3.7608	205.37	4.1001	93.54	3.7157	180.02	4.0567	94.78	3.7655
219.38	4.0998	94.39	3.8018	220.9	4.0997	96.59	3.8096	214.06	4.0997	95.36	3.807	189	4.0746	94.06	3.7605	206.03	4.1001	93.62	3.7153	180.59	4.0579	94.95	3.7649
219.92	4.0998	94.48	3.8015	221.46	4.0998	96.68	3.8093	214.67	4.0998	95.71	3.8059	189.37	4.0755	94.41	3.7592	206.68	4.1001	93.97	3.7142	180.96	4.0585	95.22	3.7639
220.46	4.0998	94.74	3.8005	222.02	4.0997	97.03	3.8081	215.29	4.0997	95.8	3.8055	189.93	4.0766	94.5	3.7589	207.34	4.1001	94.06	3.7139	181.34	4.0595	95.39	3.7633
221	4.0998	94.92	3.8001	222.57	4.0998	97.12	3.808	215.89	4.0997	96.15	3.8044	190.31	4.0772	94.85	3.7578	207.98	4.1001	94.32	3.7129	181.9	4.0604	95.74	3.7621
221.54	4.0998	95.27	3.7989	223.13	4.0997	97.38	3.807	216.5	4.0997	96.23	3.8041	190.87	4.0784	94.94	3.7575	208.63	4.1001	94.5	3.7124	182.46	4.0617	95.83	3.7618
222.07	4.0998	95.36	3.7986	223.68	4.0998	97.55	3.8064	217.1	4.0997	96.58	3.803	191.25	4.079	95.2	3.7565	209.27	4.1001	94.85	3.7111	182.84	4.0625	96.09	3.7608
222.61	4.0998	95.71	3.7973	224.23	4.0997	97.9	3.8052	217.7	4.0997	96.67	3.8026	191.81	4.0801	95.37	3.7558	209.91	4.1001	94.94	3.7108	183.4	4.0637	96.27	3.7602
223.14	4.0997	95.79	3.7972	224.78	4.0997	97.99	3.8049	218.3	4.0997	97.02	3.8015	192.18	4.0809	95.72	3.7547	210.54	4.1001	95.29	3.7097	183.77	4.0643	96.53	3.7592
223.66	4.0998	96.06	3.7962	225.32	4.0998	98.34	3.8039	218.89	4.0998	97.11	3.8012	192.75	4.0821	95.81	3.7544	211.18	4.1001	95.37	3.7086	184.34	4.0656	96.7	3.7586
224.19	4.0998	96.23	3.7957	225.86	4.0998	98.43	3.8036	219.49	4.0998	97.46	3.8001	193.12	4.0827	96.07	3.7534	211.8	4.1001	95.81	3.7077	184.71	4.0664	97.05	3.7573
224.71	4.0998	96.58	3.7946	226.4	4.0997	98.78	3.8025	220.08	4.0997	97.55	3.7997	193.68	4.0838	96.25	3.7528	212.43	4.1001	96.16	3.7066	185.27	4.0675	97.14	3.7571
225.23	4.0997	96.67	3.7943	226.94	4.0997	98.87	3.8022	220.66	4.0998	97.9	3.7986	194.06	4.0847	96.51	3.7518	213.05	4.1001	96.25	3.7063	185.65	4.0683	97.49	3.7558
225.75	4.0997	97.02	3.793	227.47	4.0997	99.22	3.801	221.25	4.0997	97.98	3.7983	194.81	4.0861	96.69	3.7513	213.67	4.1001	96.51	3.7053	186.21	4.0695	97.58	3.7555
226.27	4.0998	97.11	3.7928	228.01	4.0997	99.3	3.8007	221.83	4.0998	98.33	3.7972	194.99	4.0864	96.95	3.7502	214.29	4.1001	96.69	3.7047	186.59	4.0703	97.84	3.7545
226.78	4.0998	97.37	3.7918	228.54	4.0997	99.65	3.7996	222.41	4.0997	98.42	3.797	195.56	4.0876	97.12	3.7495	214.9	4.1001	96.95	3.7037	187.15	4.0716	98.02	3.7539
227.29	4.0998	97.54	3.7913	229.07	4.0997	99.74	3.7994	222.98	4.0997	98.68	3.796	195.93	4.0884	97.47	3.7484	215.51	4.1001	97.12	3.7032	187.52	4.0722	98.28	3.7529
227.8	4.0998	97.89	3.7901	229.59	4.0998	100	3.7984	223.55	4.0997	98.86	3.7955	196.49	4.0895	97.56	3.7481	216.12	4.1001	97.47	3.7019	188.09	4.0735	98.45	3.7523
228.31	4.0998	97.98	3.7899	230.11	4.0997	100.18	3.7978	224.13	4.0997	99.21	3.7944	196.87	4.0901	97.82	3.7471	216.72	4.1001	97.56	3.7016	188.46	4.0743	98.72	3.7513
228.82	4.0998	98.24	3.7889	230.64	4.0998	100.53	3.7967	224.69	4.0997	99.3	3.7941	197.43	4.0913	98	3.7466	217.32	4.1001	97.91	3.7005	189.02	4.0755	98.89	3.7508
229.32	4.0998	98.42	3.7884	231.15	4.0997	100.61	3.7965	225.26	4.0997	99.56	3.7931	197.81	4.0919	98.35	3.7454	217.92	4.1001	98	3.7002	189.4	4.0763	99.24	3.7495
229.82	4.0998	98.77	3.7873	231.67	4.0997	100.88	3.7955	225.82	4.0998	99.73	3.7926	198.37	4.0932	98.44	3.745	218.51	4.1001	98.35	3.6989	189.96	4.0775	99.33	3.7492
230.32	4.0997	98.86	3.787	232.19	4.0998	101.05	3.7949	226.38	4.0997	100.08	3.7915	198.74	4.0939	98.79	3.7437	219.1	4.1001	98.44	3.6987	190.34	4.0784	99.68	3.7479
230.82	4.0998	99.21	3.7859	232.7	4.0998	101.4	3.7939	226.94	4.0997	100.17	3.7912	199.31	4.095	98.87	3.7436	219.69	4.1001	98.7	3.6977	190.9	4.0795	99.77	3.7476
231.31	4.0998	99.29	3.7855	233.21	4.0997	101.49	3.7936	227.49	4.0998	100.52	3.7901	199.68	4.0958	99.14	3.7426	220.28	4.1001	98.87	3.6971	191.27	4.0803	100.03	3.7466
231.81	4.0998	99.64	3.7844	233.71	4.0997	101.75	3.7926	228.05	4.0997	100.61	3.7897	200.24	4.0969	99.31	3.7421	220.86	4.1001	99.22	3.696	191.65	4.0813	100.2	3.7462
232.3	4.0998	99.73	3.7841	234.22	4.0997	101.93	3.7922	228.6	4.0997	100.96	3.7886	200.62	4.0977	99.57	3.741	221.44	4.1003	99.31	3.6956	192.21	4.0824	100.47	3.7452
232.79	4.0997	100.08	3.783	234.72	4.0998	102.28	3.791	229.14	4.0998	101.05	3.7883	201.18	4.0987	99.75	3.7405	222.01	4.1001	99.66	3.6944	192.59	4.0834	100.64	3.7445
233.27	4.0997	100.17	3.7826	235.22	4.0997	102.36	3.7907	229.69	4.0997	101.4	3.7871	201.56	4.0995	100.01	3.7395	222.58	4.1001	99.75	3.694	193.15	4.0845	100.99	3.7433
233.76	4.0998	100.52	3.7815	235.72	4.0997	102.71	3.7896	230.23	4.0998	101.48	3.7868	201.74	4.1	100.19	3.7389	223.15	4.1001	100.1	3.6929	193.71	4.0858	101.08	3.7431
234.24	4.0997	100.61	3.7812	236.22	4.0997	102.8	3.7892	230.77	4.0997	101.92	3.7854	201.74	4.1	100.54	3.7378	223.72	4.1001	100.19	3.6926	194.09	4.0866	101.34	3.7421
234.72	4.0997	100.96	3.78	236.71	4.0997	103.15	3.7881	231.31	4.0997	102.27	3.7842	201.93	4.1	100.62	3.7374	224.28	4.1001	100.45	3.6916	194.46	4.0876	101.52	3.7415
235.2	4.0998	101.04	3.7799	237.21	4.0997	103.24	3.788	231.84	4.0997	102.36	3.7841	202.67	4.1	100.97	3.7362	224.84	4.1001	100.62	3.6911	195.02	4.0887	101.78	3.7405
235.67	4.0998	101.31	3.7789	237.7	4.0998	103.5	3.787	232.37	4.0997	102.62	3.7831	203.59	4.1	101.06	3.7358	225.4	4.1001	100.97	3.6898	195.59	4.09	101.95	3.7399
236.15	4.0998	101.48	3.7783	238.18	4.0997	103.68	3.7865	232.9	4.0997	102.8	3.7826	204.5	4.1	101.41	3.7347	225.96	4.1001	101.06	3.6895	195.96	4.0908	102.3	3.7387
236.62	4.0998	101.83	3.7771	238.67	4.0998	104.03	3.7854	233.43	4.0998	103.15	3.7815	205.41	4.1	101.5	3.7344	226.51	4.1001	101.32	3.6885	196.52	4.0921	102.39	3.7384
237.09	4.0998	101.92	3.777	239.15	4.0997	104.11	3.7851	233.96	4.0998	103.23	3.7812	206.3	4.1	101.85	3.7331	227.06	4.1001	101.5	3.6881	196.9	4.093	102.65	3.7374
237.18	4.0998	102.18	3.776	239.63	4.0998	104.46	3.7839	234.48	4.0998	103.58	3.78	207.19	4.1	101.94	3.7329	227.6	4.1001	101.76	3.6871	197.46	4.0942	102.83	3.7368
237.18	4.0997	102.36	3.7755	240.11	4.0998	104.55	3.7836	235	4.0997	103.67	3.7797	208.07	4.1	102.29	3.7316	228.14	4.1001	101.94	3.6864	197.84	4.0951	103.09	3.7358
237.27	4.0997	102.71	3.7744	240.59	4.0998	104.9	3.7825	235.52	4.0998	104.02	3.7786	208.95	4.0998	102.37	3.7313	228.68	4.1001	102.29	3.6853	198.4	4.0964	103.27	3.7352
237.65	4.1	102.79	3.7741	241.06	4.0998	104.99	3.7823	236.03	4.0997	104.11	3.7783	209.82	4.1	102.72	3.73	229.22	4.1001	102.37	3.685	198.78	4.0972	103.62	3.7341
238.12	4.1003	103.06	3.7731	241.54	4.0998	105.25	3.7813	236.55	4.0997	104.46	3.7773	210.68	4.1	102.81	3.7299	229.75	4.1001	102.72	3.6839	199.34	4.0985	103.7	3.7337
238.59	4.1008	103.23	3.7726	242.01	4.0997	105.43	3.7809	237.06	4.0998	104.55	3.777	211.53	4.1	103.07	3.7289	230.28	4.1001	102.81	3.6835	199.71	4.0995	104.05	3.7324
239.05	4.1013	103.58	3.7715	242.19	4.0997	105.78	3.7797	237.56	4.0997	104.9	3.7759	212.39	4.1	103.25	3.7282	230.81	4.1001	103.16	3.6822	200.09	4.1003	104.14	3.7321
239.52	4.1018	103.67	3.7712	242.19	4.0997	105.86	3.7794	238.07	4.0997	104.98	3.7755	213.23	4.1	103.6	3.7271	231.33	4.1001	103.25	3.6821	200.09	4.1005	104.4	3.7311
239.99	4.1022	104.02	3.77	242.28	4.0997	106.21	3.7783	238.57	4.0997	105.33	3.7744	214.07	4.1	103.69	3.7268	231.86	4.1001	103.51	3.6811	200.28	4.1005	104.58	3.7307
240.46	4.1029	104.11	3.7697	242.66	4.1	106.3	3.7781	239.07	4.0997	105.42	3.7741	214.9	4.1	104.04	3.7255	232.38	4.1001	103.69	3.6805	201.02	4.1006	104.84	3.7297
240.93	4.1034	104.46	3.7686	243.13	4.1003	106.56	3.7771	239.57	4.0997	105.77	3.7729	215.73	4.1	104.12	3.7253	232.89	4.1001	103.95	3.6795	201.94	4.1006	105.02	3.7291
241.4	4.104	104.54	3.7683	243.6	4.1008	106.74	3.7767	240.07	4.0997	105.86	3.7728	216.55	4.1	104.47	3.724	233.4	4.1001	104.12	3.679	202.85	4.1006	105.28	3.7281
241.87	4.1047	104.89	3.7671	244.06	4.1013	107	3.7757	240.56	4.0997	106.12	3.7718	217.36	4.1	104.56	3.7237	233.91	4.1001	104.47	3.6779	203.74	4.1006	105.45	3.7274
242.33	4.1053	104.98	3.767	244.53	4.1018	107.18	3.7752	241.05	4.0997	106.3	3.7713	218.17	4.0998	104.91	3.7226	234.42	4.1001	104.56	3.6774	204.63	4.1006	105.8	3.7263
242.8	4.1058	105.24	3.766	245	4.1022	107.53	3.7741	241.54	4.0997	106.65	3.7702	218.98	4.1	105	3.7223	234.93	4.1001	104.91	3.6763	205.51	4.1006	105.89	3.726
243.27	4.1064	105.42	3.7655	245.47	4.1029	107.61	3.7738	242.03	4.0998	106.73	3.7699	219.78	4.1	105.35	3.721	235.43	4.1001	105	3.676	206.38	4.1006	106.15	3.725
243.74	4.1071	105.77	3.7644	245.94	4.1035	107.96	3.7726	242.51	4.0997	107.08	3.7688	220.57	4.1	105.44	3.7208	235.93	4.1001	105.26	3.675	207.24	4.1006	106.33	3.7245
244.21	4.1079	105.86	3.7641	246.41	4.1042	108.05	3.7725	242.99	4.0997	107.17	3.7684	221.36	4.1	105.79	3.7197	236.42	4.1003	105.44	3.6745	208.09	4.1006	106.68	3.7232
244.68	4.1085	106.21	3.7629	246.88	4.1047	108.31	3.7715	243.47	4.0998	107.52	3.7673	222.14	4.1	105.87	3.7194	236.92	4.1001	105.7	3.6735	208.93	4.1006	106.77	3.7229
245.14	4.1092	106.29	3.7626	247.34	4.1055	108.49	3.771	243.95	4.0997	107.61	3.7671	222.92	4.0998	106.14	3.7184	237.41	4.1001	105.87	3.673	209.77	4.1006	107.03	3.7219
245.61	4.1098	106.64	3.7615	247.81	4.106	108.84	3.7699	244.43	4.0998	107.96	3.7658	223.69	4.1	106.31	3.7178	237.9	4.1001	106.22	3.6718	210.6	4.1008	107.21	3.7213
246.08	4.1105	106.73	3.7612	248.28	4.1068	108.93	3.7696	244.9	4.0997	108.05	3.7657	224.46	4.0998	106.66	3.7166	238.38	4.1001	106.31	3.6714	211.42	4.1006	107.56	3.7202
246.55	4.1113	107.08	3.76	248.75	4.1074	109.28	3.7684	245.37	4.0997	108.4	3.7646	225.22	4.1	106.75	3.7163	238.86	4.1001	106.66	3.6703	212.23	4.1006	107.64	3.7199
247.02	4.1119	107.17	3.7599	249.22	4.1081	109.36	3.7683	245.56	4.0997	108.48	3.7642	225.98	4.0998	107.1	3.7152	239.34	4.1001	106.75	3.67	213.04	4.1006	107.91	3.7189
247.49	4.1127	107.43	3.7589	249.69	4.1089	109.63	3.7673	245.56	4.0995	108.83	3.7631	226.73	4.1	107.19	3.7148	239.82	4.1001	107.1	3.6689	213.84	4.1006	108.08	3.7182
247.96	4.1134	107.6	3.7584	250.16	4.1095	109.8	3.7668	245.65	4.0995	108.92	3.7628	227.48	4.0998	107.54	3.7137	240.29	4.1001	107.19	3.6685	214.63	4.1008	108.43	3.7171
248.42	4.1142	107.95	3.7573	250.62	4.1102	110.15	3.7657	246.03	4.1	109.27	3.7617	228.22	4.1	107.62	3.7134	240.76	4.1001	107.54	3.6674	215.41	4.1006	108.52	3.7168
248.89	4.1148	108.04	3.757	251.09	4.111	110.24	3.7654	246.5	4.1003	109.36	3.7615	228.96	4.1	107.89	3.7124	241.05	4.1001	107.62	3.6671	216.19	4.1006	108.78	3.7158
249.36	4.1156	108.39	3.7558	251.56	4.1118	110.59	3.7642	246.97	4.1008	109.71	3.7604	229.69	4.1	108.06	3.7119	241.05	4.1001	107.89	3.6661	216.96	4.1006	108.96	3.7152
249.83	4.1163	108.48	3.7555	252.03	4.1124	110.68	3.7641	247.43	4.1014	109.8	3.76	230.41	4.0998	108.41	3.7107	241.14	4.1001	108.06	3.6656	217.72	4.1006	109.22	3.7142
250.3	4.1171	108.83	3.7544	252.5	4.1131	111.03	3.7628	247.9	4.1019	110.15	3.7589	231.14	4.1	108.5	3.7103	241.52	4.1008	108.41	3.6643	218.48	4.1006	109.39	3.7137
250.77	4.1179	108.92	3.7542	252.97	4.1139	111.11	3.7626	248.37	4.1026	110.23	3.7587	231.85	4.0998	108.85	3.7092	241.99	4.1016	108.5	3.664	219.23	4.1006	109.74	3.7124
251.24	4.1185	109.27	3.7529	253.43	4.1147	111.46	3.7615	248.84	4.1032	110.58	3.7576	232.57	4.1	108.94	3.7089	242.46	4.1024	108.76	3.663	219.97	4.1006	109.83	3.7121
251.7	4.1194	109.35	3.7528	253.9	4.1155	111.55	3.7612	249.31	4.1039	110.67	3.7573	233.27	4.1	109.29	3.7077	242.92	4.1034	108.94	3.6626	220.71	4.1006	110.18	3.711
252.17	4.1202	109.7	3.7516	254.37	4.1161	111.9	3.76	249.78	4.1045	110.93	3.7563	233.98	4.1	109.37	3.7074	243.39	4.1043	109.29	3.6614	221.44	4.1008	110.27	3.7107
252.64	4.121	109.79	3.7513	254.84	4.1169	111.99	3.7597	250.25	4.1052	111.11	3.7558	234.68	4.1	109.72	3.7063	243.77	4.1053	109.37	3.6611	222.16	4.1006	110.53	3.7097
253.11	4.1216	110.14	3.7502	255.31	4.1177	112.34	3.7587	250.71	4.1058	111.46	3.7547	235.37	4.0998	109.81	3.706	243.86	4.1055	109.72	3.66	222.88	4.1006	110.71	3.709
253.58	4.1224	110.23	3.7499	255.78	4.1184	112.43	3.7584	251.18	4.1064	111.55	3.7545	236.06	4.1	110.07	3.705	244.33	4.1064	109.81	3.6597	223.59	4.1006	111.06	3.7079
254.05	4.1232	110.58	3.7489	256.25	4.1194	112.78	3.7573	251.65	4.1072	111.9	3.7534	236.74	4.0998	110.25	3.7045	244.8	4.1074	110.07	3.6587	224.3	4.1006	111.14	3.7076
254.52	4.124	110.67	3.7486	256.71	4.12	112.86	3.757	252.12	4.1081	111.98	3.7531	237.42	4.1	110.6	3.7034	245.27	4.1085	110.25	3.6582	224.99	4.1006	111.41	3.7066
254.98	4.1248	111.02	3.7474	257.18	4.1208	113.21	3.756	252.59	4.1087	112.25	3.7521	238.1	4.1	110.69	3.7031	245.74	4.1095	110.51	3.6572	225.69	4.1006	111.58	3.706
255.45	4.1257	111.1	3.7473	257.65	4.1216	113.3	3.7557	253.06	4.1095	112.42	3.7516	238.77	4.1	110.95	3.7021	246.2	4.1106	110.69	3.6567	226.37	4.1006	111.93	3.7048
255.92	4.1265	111.37	3.7463	258.12	4.1224	113.65	3.7545	253.52	4.1102	112.77	3.7505	239.43	4.1	111.12	3.7016	246.67	4.1116	111.04	3.6555	227.05	4.1006	112.02	3.7045
256.39	4.1273	111.54	3.7457	258.59	4.1232	113.74	3.7544	253.99	4.111	112.86	3.7504	240.1	4.1	111.39	3.7006	247.05	4.1126	111.12	3.6553	227.73	4.1008	112.37	3.7032
256.86	4.1281	111.89	3.7447	259.06	4.124	114	3.7534	254.46	4.1118	113.21	3.7492	240.75	4.1	111.56	3.7002	247.14	4.1127	111.39	3.6543	228.4	4.1006	112.46	3.7029
257.33	4.1289	111.98	3.7444	259.53	4.1248	114.18	3.7528	254.93	4.1126	113.29	3.7489	241.41	4.1	111.82	3.6992	247.61	4.1139	111.56	3.6537	229.06	4.1006	112.81	3.7018
257.79	4.1297	112.33	3.7433	259.99	4.1257	114.53	3.7518	255.4	4.1134	113.64	3.7478	242.05	4.1	112	3.6987	248.08	4.115	111.91	3.6526	229.71	4.1006	112.89	3.7015
258.26	4.1305	112.42	3.7429	260.46	4.1266	114.61	3.7515	255.87	4.114	113.73	3.7474	242.7	4.1	112.26	3.6977	248.55	4.116	112	3.6522	230.36	4.1006	113.16	3.7005
258.73	4.1313	112.77	3.7418	260.93	4.1274	114.96	3.7505	256.34	4.1148	114.17	3.7462	243.34	4.1	112.44	3.6971	249.02	4.1171	112.35	3.6511	231.01	4.1006	113.33	3.7
259.2	4.1321	112.85	3.7416	261.4	4.1282	115.05	3.7502	256.8	4.1156	114.52	3.745	243.97	4.1	112.79	3.696	249.48	4.1182	112.44	3.6508	231.65	4.1006	113.59	3.699
259.67	4.1329	113.2	3.7405	261.87	4.129	115.4	3.7491	257.27	4.1165	114.61	3.7449	244.6	4.1	112.87	3.6958	249.86	4.1192	112.79	3.6496	232.28	4.1006	113.77	3.6985
260.14	4.1339	113.29	3.7402	262.34	4.1298	115.49	3.7487	257.74	4.1174	114.96	3.7437	245.23	4.1	113.14	3.6948	249.95	4.1194	112.87	3.6493	232.91	4.1006	114.12	3.6973
260.61	4.1347	113.64	3.7391	262.81	4.1308	115.93	3.7474	258.21	4.1182	115.04	3.7434	245.85	4.0998	113.31	3.6944	250.42	4.1205	113.22	3.6482	233.53	4.1006	114.21	3.6969
261.07	4.1355	113.73	3.7389	263.27	4.1316	116.28	3.7463	258.68	4.119	115.39	3.7423	246.47	4.1	113.57	3.6934	250.89	4.1216	113.31	3.6479	234.15	4.1006	114.56	3.6956
261.54	4.1363	113.99	3.7379	263.74	4.1324	116.36	3.746	259.15	4.1198	115.48	3.7421	247.08	4.0998	113.75	3.6929	251.27	4.1226	113.66	3.6467	234.76	4.1006	114.64	3.6953
262.01	4.1371	114.17	3.7374	264.21	4.1334	116.71	3.7449	259.62	4.1206	115.83	3.7408	247.69	4.1	114.01	3.6919	251.36	4.1227	113.75	3.6464	235.37	4.1006	114.99	3.6942
262.48	4.1381	114.52	3.7363	264.68	4.1342	116.8	3.7447	260.08	4.1215	115.92	3.7407	248.3	4.1	114.19	3.6914	251.83	4.1239	114.1	3.6453	235.97	4.1006	115.08	3.6939
262.95	4.1389	114.6	3.7362	265.15	4.135	117.15	3.7436	260.55	4.1224	116.27	3.7395	248.9	4.1	114.54	3.6903	252.3	4.125	114.19	3.645	236.57	4.1006	115.43	3.6927
263.42	4.1397	114.87	3.7352	265.62	4.136	117.24	3.7433	261.02	4.1232	116.36	3.7394	249.49	4.1	114.62	3.6898	252.76	4.1261	114.54	3.6438	237.16	4.1006	115.52	3.6924
263.89	4.1407	115.04	3.7347	266.09	4.1368	117.59	3.7423	261.49	4.124	116.62	3.7384	250.09	4.1	115.06	3.6885	253.14	4.1271	114.62	3.6435	237.74	4.1006	115.78	3.6914
264.35	4.1415	115.39	3.7336	266.55	4.1378	117.68	3.742	261.96	4.125	116.79	3.7379	250.67	4.0998	115.41	3.6874	253.23	4.1273	114.89	3.6425	238.32	4.1006	115.96	3.6908
264.82	4.1423	115.48	3.7334	267.02	4.1386	118.03	3.7408	262.43	4.1258	117.14	3.7368	251.26	4.1	115.5	3.6869	253.7	4.1284	115.06	3.6421	238.9	4.1006	116.31	3.6897
265.29	4.1432	115.74	3.7324	267.49	4.1395	118.11	3.7407	262.9	4.1268	117.23	3.7366	251.84	4.1	115.94	3.6856	254.08	4.1294	115.32	3.6411	239.47	4.1006	116.39	3.6893
265.76	4.1441	115.92	3.732	267.96	4.1403	118.46	3.7395	263.36	4.1276	117.58	3.7355	252.41	4.1	116.29	3.6845	254.17	4.1295	115.5	3.6406	240.03	4.1006	116.74	3.6882
266.23	4.145	116.27	3.7308	268.43	4.1413	118.55	3.7392	263.83	4.1284	117.67	3.7352	252.99	4.1	116.37	3.6842	254.55	4.1305	115.76	3.6396	240.59	4.1006	116.83	3.6879
266.7	4.1458	116.35	3.7307	268.9	4.1421	118.9	3.7381	264.3	4.1294	118.02	3.7342	253.55	4.0998	116.72	3.6831	254.64	4.1307	115.94	3.6392	241.15	4.1006	117.18	3.6868
267.16	4.1468	116.62	3.7297	269.37	4.1431	118.99	3.7379	264.77	4.1302	118.11	3.7339	254.12	4.0998	116.81	3.6827	255.11	4.1319	116.2	3.6382	241.7	4.1006	117.27	3.6864
267.63	4.1476	116.79	3.7292	269.83	4.1441	119.34	3.7368	265.24	4.1311	118.46	3.7328	254.68	4.1	117.16	3.6816	255.48	4.1329	116.37	3.6377	242.24	4.1006	117.62	3.6852
268.1	4.1486	117.14	3.7281	270.3	4.1449	119.43	3.7365	265.71	4.1319	118.54	3.7324	255.23	4.1	117.25	3.6813	255.58	4.1331	116.64	3.6367	242.78	4.1006	117.71	3.6848
268.57	4.1494	117.23	3.7279	270.77	4.1458	119.78	3.7355	266.17	4.1329	118.98	3.7311	255.78	4.1	117.6	3.6801	256.04	4.1342	116.81	3.6363	243.32	4.1006	118.06	3.6837
269.04	4.1503	117.58	3.7266	271.24	4.1468	119.86	3.7352	266.64	4.1339	119.33	3.73	256.33	4.1	117.69	3.68	256.42	4.1352	117.07	3.6353	243.85	4.1006	118.14	3.6834
269.51	4.1513	117.67	3.7265	271.71	4.1476	120.21	3.7341	267.11	4.1347	119.42	3.7297	256.88	4.1	117.95	3.679	256.51	4.1355	117.25	3.6346	244.38	4.1006	118.41	3.6824
269.98	4.1521	118.02	3.7253	272.18	4.1486	120.3	3.7339	267.58	4.1357	119.77	3.7287	257.42	4.0998	118.12	3.6785	256.98	4.1366	117.69	3.6333	244.9	4.1006	118.58	3.6819
270.44	4.1531	118.1	3.725	272.64	4.1495	120.65	3.7328	268.05	4.1366	119.86	3.7284	257.95	4.0998	118.47	3.6774	257.45	4.1378	118.04	3.6322	245.42	4.1006	118.93	3.6806
270.91	4.1541	118.45	3.724	273.11	4.1505	120.74	3.7324	268.52	4.1374	120.21	3.7274	258.48	4.1	118.56	3.6771	257.92	4.139	118.12	3.6319	245.93	4.1006	119.02	3.6803
271.38	4.155	118.54	3.7237	273.58	4.1515	121.17	3.7311	268.99	4.1384	120.29	3.7271	259.01	4.1	118.91	3.676	258.29	4.14	118.39	3.6309	246.44	4.1006	119.37	3.6792
271.85	4.1558	118.89	3.7226	274.05	4.1524	121.52	3.73	269.45	4.1394	120.64	3.726	259.54	4.1	119	3.6756	258.39	4.1402	118.56	3.6304	246.94	4.1006	119.46	3.6789
272.32	4.1568	118.98	3.7223	274.52	4.1534	121.61	3.7299	269.92	4.1403	120.73	3.7258	260.06	4.1	119.35	3.6745	258.86	4.1415	118.91	3.6293	247.44	4.1008	119.72	3.6779
272.79	4.1578	119.33	3.7213	274.99	4.1542	121.87	3.7289	270.39	4.1411	121.08	3.7247	260.57	4.1	119.44	3.6742	259.32	4.1426	119	3.629	247.93	4.1006	119.89	3.6774
273.26	4.1587	119.42	3.721	275.46	4.1554	122.05	3.7284	270.86	4.1421	121.17	3.7244	261.09	4.1	119.79	3.6732	259.79	4.1437	119.26	3.628	248.42	4.1006	120.16	3.6764
273.72	4.1595	119.77	3.72	275.92	4.1563	122.4	3.7274	271.33	4.1431	121.52	3.7234	261.59	4.1	119.87	3.6729	260.17	4.1447	119.44	3.6275	248.91	4.1008	120.33	3.676
274.19	4.1607	119.85	3.7197	276.39	4.1573	122.49	3.7271	271.8	4.1441	121.61	3.7231	262.1	4.1	120.14	3.6719	260.26	4.145	119.79	3.6264	249.39	4.1008	120.59	3.6748
274.66	4.1615	120.2	3.7186	276.86	4.1581	122.84	3.726	272.27	4.145	121.96	3.7219	262.6	4.1	120.31	3.6714	260.64	4.146	119.87	3.6261	249.87	4.1006	120.77	3.6743
275.13	4.1625	120.29	3.7184	277.33	4.1591	122.92	3.7258	272.73	4.146	122.04	3.7216	263.1	4.1	120.66	3.6703	260.73	4.1462	120.14	3.6251	250.34	4.1006	121.12	3.6732
275.6	4.1634	120.64	3.7171	277.8	4.16	123.27	3.7247	273.2	4.147	122.48	3.7203	263.59	4.1	120.75	3.67	261.2	4.1474	120.31	3.6246	250.72	4.1006	121.21	3.6729
276.07	4.1644	120.73	3.7169	278.17	4.161	123.36	3.7244	273.67	4.1479	122.92	3.719	264.08	4.1	121.1	3.6689	261.67	4.1486	120.66	3.6235	250.72	4.1006	121.56	3.6716
276.54	4.1654	121.08	3.7158	278.27	4.1612	123.71	3.7234	274.14	4.1489	123.27	3.7179	264.57	4.1	121.19	3.6685	262.14	4.1497	120.75	3.6232	250.81	4.1006	121.64	3.6714
277	4.1663	121.17	3.7157	278.74	4.1621	123.8	3.7231	274.61	4.1499	123.36	3.7178	265.05	4.1	121.53	3.6674	262.51	4.1508	121.1	3.622	251.19	4.1013	121.99	3.6701
277.47	4.1673	121.51	3.7145	279.2	4.1631	124.15	3.7219	275.08	4.1508	123.71	3.7166	265.53	4.1	121.62	3.6671	262.6	4.151	121.19	3.6217	251.66	4.1022	122.08	3.6698
277.94	4.1683	121.6	3.7142	279.67	4.1642	124.24	3.7218	275.55	4.1518	123.79	3.7165	266.01	4.1	121.97	3.6661	262.98	4.152	121.54	3.6206	252.13	4.1031	122.43	3.6687
278.41	4.1692	121.95	3.7132	280.14	4.1652	124.59	3.7207	276.01	4.1528	124.06	3.7155	266.48	4.1	122.06	3.6658	263.07	4.1523	121.62	3.6203	252.59	4.104	122.52	3.6684
278.88	4.1702	122.04	3.7129	280.61	4.1662	124.67	3.7203	276.48	4.1537	124.23	3.715	266.76	4.0998	122.32	3.6648	263.45	4.1533	121.97	3.6191	253.06	4.1052	122.87	3.6672
279.35	4.1713	122.39	3.7118	281.08	4.1671	125.11	3.719	276.95	4.1549	124.58	3.714	266.76	4.0998	122.5	3.6643	263.54	4.1536	122.06	3.6188	253.53	4.1061	122.96	3.6669
279.81	4.1723	122.48	3.7116	281.55	4.1683	125.55	3.7178	277.42	4.1558	124.67	3.7137	266.85	4.0998	122.85	3.6632	264.01	4.1547	122.41	3.6177	254	4.1071	123.22	3.6659
280.28	4.1733	122.83	3.7105	282.02	4.1692	125.9	3.7166	277.89	4.1568	125.11	3.7124	267.23	4.1005	122.93	3.6629	264.39	4.1557	122.5	3.6174	254.38	4.1081	123.39	3.6655
280.75	4.1742	122.91	3.7102	282.48	4.1702	125.99	3.7165	278.36	4.1578	125.46	3.7113	267.7	4.1013	123.28	3.6618	264.48	4.156	122.85	3.6164	254.47	4.1084	123.66	3.6645
281.22	4.1752	123.26	3.7092	282.95	4.1712	126.34	3.7153	278.82	4.1587	125.54	3.711	268.17	4.1019	123.37	3.6614	264.85	4.157	122.94	3.6159	254.94	4.1093	123.83	3.6638
281.69	4.1762	123.35	3.7089	283.42	4.1723	126.42	3.7152	279.29	4.1599	125.89	3.71	268.63	4.1027	123.81	3.6601	264.95	4.1571	123.29	3.6148	255.31	4.1103	124.18	3.6627
282.16	4.1773	123.7	3.7079	283.89	4.1733	126.77	3.714	279.76	4.1608	125.98	3.7097	269.1	4.1037	124.16	3.659	265.32	4.1583	123.37	3.6145	255.41	4.1105	124.27	3.6624
282.63	4.1783	123.79	3.7076	284.36	4.1744	126.86	3.7139	280.23	4.1618	126.33	3.7087	269.57	4.1045	124.25	3.6587	265.42	4.1584	123.72	3.6133	255.88	4.1118	124.62	3.6611
283.09	4.1792	124.14	3.7065	284.83	4.1754	127.21	3.7128	280.7	4.1629	126.42	3.7084	270.04	4.1055	124.6	3.6576	265.79	4.1594	123.81	3.6132	256.34	4.1129	124.71	3.6609
283.56	4.1804	124.23	3.7061	285.3	4.1763	127.3	3.7124	281.17	4.1639	126.77	3.7073	270.51	4.1064	124.68	3.6574	265.88	4.1597	124.07	3.6122	256.72	4.1139	125.06	3.6598
284.03	4.1813	124.66	3.7048	285.67	4.1773	127.74	3.7111	281.64	4.1649	126.86	3.7071	270.98	4.1074	124.95	3.6564	266.26	4.1607	124.25	3.6117	256.81	4.1142	125.15	3.6595
284.5	4.1825	125.01	3.7037	285.76	4.1775	128.17	3.7098	282.1	4.166	127.21	3.706	271.45	4.1084	125.12	3.6559	266.35	4.1608	124.6	3.6106	257.19	4.1152	125.5	3.6582
284.97	4.1834	125.1	3.7036	286.23	4.1786	128.61	3.7086	282.57	4.167	127.29	3.7058	271.91	4.1093	125.47	3.6548	266.73	4.1618	124.69	3.6103	257.28	4.1153	125.58	3.6579
285.44	4.1844	125.45	3.7024	286.7	4.1796	128.96	3.7074	283.04	4.1681	127.56	3.7048	272.29	4.1103	125.56	3.6545	266.82	4.1621	125.04	3.6091	257.75	4.1166	125.93	3.6567
285.91	4.1855	125.54	3.7023	287.17	4.1805	129.05	3.7071	283.51	4.1691	127.73	3.7044	272.38	4.1105	125.91	3.6534	267.2	4.1631	125.12	3.6088	258.22	4.1177	126.02	3.6564
286.37	4.1865	125.89	3.7011	287.54	4.1815	129.4	3.7061	283.98	4.1702	128.08	3.7034	272.85	4.1116	126	3.6532	267.29	4.1634	125.47	3.6077	258.59	4.1187	126.37	3.6553
286.75	4.1875	125.98	3.7008	287.64	4.1817	129.49	3.7058	284.45	4.1712	128.17	3.7031	273.32	4.1126	126.35	3.6521	267.67	4.1644	125.56	3.6075	258.69	4.1189	126.46	3.655
286.84	4.1876	126.33	3.6998	288.11	4.1828	129.84	3.7048	284.92	4.1723	128.52	3.7021	273.79	4.1137	126.43	3.6517	267.76	4.1647	125.91	3.6062	259.16	4.1202	126.81	3.6538
287.31	4.1886	126.41	3.6995	288.57	4.1838	129.92	3.7045	285.38	4.1733	128.6	3.7018	274.26	4.1147	126.78	3.6506	268.13	4.1657	126	3.6061	259.62	4.1215	126.9	3.6535
287.69	4.1896	126.76	3.6985	289.04	4.1849	130.36	3.7032	285.85	4.1744	128.95	3.7008	274.73	4.1158	126.87	3.6503	268.23	4.1658	126.26	3.6051	260.09	4.1226	127.25	3.6524
287.78	4.1897	126.85	3.6982	289.42	4.1859	130.8	3.7019	286.32	4.1755	129.04	3.7005	275.19	4.1169	127.22	3.6492	268.6	4.167	126.44	3.6046	260.47	4.1237	127.33	3.6521
288.25	4.1909	127.29	3.6969	289.51	4.186	131.15	3.7008	286.79	4.1767	129.39	3.6994	275.66	4.1181	127.31	3.649	268.7	4.1671	126.79	3.6035	260.56	4.1239	127.6	3.6511
288.72	4.1918	127.64	3.6958	289.98	4.1872	131.24	3.7006	287.26	4.1776	129.48	3.6992	276.13	4.119	127.66	3.6479	269.07	4.1683	126.87	3.6032	260.94	4.125	127.77	3.6506
289.19	4.193	127.73	3.6955	290.45	4.1881	131.67	3.6994	287.63	4.1786	129.83	3.6981	276.51	4.12	127.75	3.6477	269.17	4.1684	127.22	3.602	261.03	4.1252	128.03	3.6496
289.65	4.1939	128.08	3.6945	290.92	4.1892	132.02	3.6984	287.73	4.1788	129.92	3.6977	276.6	4.1202	128.01	3.6467	269.54	4.1694	127.31	3.6019	261.41	4.1263	128.21	3.649
290.03	4.1949	128.16	3.6944	291.39	4.1904	132.11	3.6981	288.2	4.1799	130.35	3.6966	277.07	4.1213	128.18	3.6463	269.63	4.1697	127.57	3.6009	261.5	4.1265	128.56	3.6479
290.12	4.1951	128.43	3.6934	291.85	4.1913	132.46	3.6969	288.66	4.1809	130.7	3.6955	277.44	4.1223	128.53	3.6451	270.01	4.1707	127.75	3.6003	261.97	4.1277	128.65	3.6475
290.59	4.1962	128.6	3.6929	292.23	4.1923	132.55	3.6968	289.13	4.182	130.79	3.6952	277.54	4.1224	128.62	3.645	270.1	4.171	128.1	3.5991	262.34	4.1287	129	3.6464
291.06	4.1973	128.95	3.6919	292.32	4.1925	132.9	3.6958	289.51	4.183	131.14	3.6942	277.91	4.1234	128.97	3.6437	270.48	4.172	128.19	3.599	262.44	4.129	129.08	3.6463
291.53	4.1983	129.04	3.6916	292.79	4.1936	132.99	3.6955	289.6	4.1831	131.23	3.6939	278.01	4.1236	129.06	3.6435	270.57	4.1723	128.45	3.598	262.81	4.13	129.35	3.6453
291.9	4.1993	129.39	3.6906	293.26	4.1947	133.34	3.6944	290.07	4.1842	131.58	3.6929	278.47	4.1247	129.41	3.6424	270.95	4.1733	128.62	3.5975	262.9	4.1303	129.52	3.6446
292	4.1994	129.48	3.6903	293.63	4.1957	133.42	3.6942	290.54	4.1852	131.67	3.6926	278.85	4.1257	129.5	3.6422	271.04	4.1734	128.97	3.5964	263.28	4.1313	129.87	3.6435
292.46	4.2005	129.83	3.6893	293.73	4.1959	133.77	3.6932	290.91	4.1862	132.02	3.6916	278.94	4.1258	129.85	3.6411	271.41	4.1746	129.06	3.5961	263.37	4.1316	129.96	3.6432
292.93	4.2017	129.91	3.689	294.2	4.197	133.86	3.6929	291.01	4.1865	132.1	3.6913	279.41	4.1269	129.93	3.6408	271.51	4.1747	129.41	3.5949	263.75	4.1326	130.31	3.6421
293.4	4.2026	130.35	3.6877	294.67	4.1981	134.21	3.6918	291.47	4.1875	132.45	3.6903	279.88	4.1281	130.28	3.6396	271.88	4.1759	129.5	3.5946	263.84	4.1329	130.4	3.6417
293.78	4.2036	130.7	3.6866	295.04	4.1991	134.3	3.6916	291.94	4.1886	132.54	3.69	280.35	4.1292	130.37	3.6393	271.98	4.176	129.85	3.5935	264.22	4.1339	130.75	3.6406
293.87	4.2038	130.79	3.6863	295.13	4.1993	134.65	3.6905	292.32	4.1896	132.89	3.689	280.72	4.1302	130.81	3.638	272.35	4.1771	129.94	3.5933	264.31	4.1342	130.83	3.6403
294.34	4.2049	131.14	3.6853	295.6	4.2004	134.74	3.6903	292.41	4.1897	132.98	3.6887	280.82	4.1303	131.16	3.6369	272.45	4.1773	130.29	3.5922	264.69	4.1352	131.1	3.6393
294.71	4.2059	131.23	3.6852	296.07	4.2015	135.09	3.6892	292.79	4.1907	133.33	3.6877	281.19	4.1313	131.25	3.6367	272.82	4.1784	130.37	3.5919	264.78	4.1355	131.27	3.6388
294.81	4.206	131.58	3.684	296.45	4.2025	135.17	3.689	292.88	4.1909	133.42	3.6874	281.29	4.1315	131.6	3.6356	272.91	4.1786	130.72	3.5907	265.15	4.1365	131.62	3.6377
295.18	4.207	131.66	3.6837	296.54	4.2026	135.61	3.6877	293.35	4.192	133.77	3.6863	281.75	4.1328	131.68	3.6353	273.29	4.1796	130.81	3.5904	265.25	4.1368	131.71	3.6374
295.28	4.2073	132.01	3.6827	296.91	4.2036	135.96	3.6866	293.72	4.193	133.85	3.6861	282.22	4.1339	132.03	3.6343	273.38	4.1799	131.16	3.5893	265.62	4.1378	131.97	3.6364
295.74	4.2083	132.1	3.6824	297.01	4.2038	136.05	3.6864	293.82	4.1931	134.2	3.685	282.6	4.1349	132.12	3.634	273.76	4.1809	131.25	3.5891	265.72	4.1381	132.15	3.6358
296.12	4.2093	132.45	3.6814	297.48	4.2049	136.49	3.6852	294.19	4.1941	134.29	3.6848	282.69	4.135	132.47	3.6329	273.85	4.1812	131.6	3.588	266.19	4.1394	132.5	3.6346
296.21	4.2094	132.54	3.6811	297.95	4.206	136.84	3.684	294.29	4.1944	134.64	3.6837	283.07	4.136	132.56	3.6325	274.32	4.1825	131.69	3.5875	266.65	4.1407	132.58	3.6345
296.59	4.2104	132.89	3.6801	298.32	4.207	136.92	3.6839	294.75	4.1954	134.73	3.6835	283.16	4.1361	133	3.6312	274.79	4.1838	132.04	3.5865	267.03	4.1418	132.85	3.6335
296.68	4.2106	132.98	3.6798	298.41	4.2072	137.27	3.6827	295.13	4.1964	135.08	3.6824	283.54	4.1371	133.35	3.6301	275.26	4.1851	132.12	3.5862	267.12	4.142	133.02	3.6329
297.15	4.2117	133.41	3.6785	298.88	4.2085	137.36	3.6826	295.22	4.1965	135.17	3.6822	283.63	4.1374	133.43	3.6298	275.63	4.1862	132.47	3.5851	267.5	4.1431	133.37	3.6319
297.52	4.2127	133.85	3.6772	299.35	4.2096	137.71	3.6816	295.6	4.1975	135.52	3.6811	284.1	4.1384	133.78	3.6287	275.72	4.1863	132.56	3.5848	267.59	4.1432	133.46	3.6316
297.62	4.2128	134.29	3.676	299.73	4.2106	137.8	3.6813	295.69	4.1976	135.6	3.681	284.47	4.1394	133.87	3.6285	276.1	4.1875	132.91	3.5836	267.97	4.1444	133.72	3.6306
297.99	4.2138	134.64	3.675	299.82	4.2107	138.15	3.6801	296.07	4.1986	135.95	3.68	284.57	4.1397	134.22	3.6274	276.19	4.1876	133	3.5833	268.06	4.1447	133.9	3.63
298.09	4.2141	134.73	3.6747	300.19	4.2117	138.24	3.68	296.16	4.1989	136.04	3.6797	284.94	4.1407	134.31	3.6272	276.57	4.1888	133.35	3.5823	268.43	4.1457	134.25	3.6288
298.56	4.2151	135.08	3.6737	300.29	4.2118	138.59	3.6789	296.63	4.2001	136.39	3.6785	285.03	4.1408	134.66	3.6261	276.66	4.1889	133.44	3.582	268.53	4.146	134.33	3.6287
299.02	4.2164	135.16	3.6734	300.66	4.2128	138.67	3.6787	297.1	4.2012	136.48	3.6784	285.41	4.1418	134.75	3.6259	277.04	4.1899	133.79	3.5809	268.9	4.147	134.6	3.6277
299.49	4.2175	135.51	3.6724	300.76	4.213	139.02	3.6777	297.47	4.2022	136.83	3.6772	285.5	4.142	135.1	3.6248	277.13	4.1902	133.87	3.5807	269	4.1473	134.77	3.6272
299.96	4.2186	135.6	3.6721	301.23	4.2143	139.11	3.6774	297.57	4.2023	136.92	3.6769	285.97	4.1432	135.18	3.6245	277.51	4.1913	134.22	3.5794	269.47	4.1486	135.03	3.6262
300.34	4.2196	135.95	3.6711	301.69	4.2154	139.46	3.6764	297.94	4.2033	137.35	3.6758	286.35	4.1442	135.53	3.6233	277.6	4.1915	134.31	3.5791	269.84	4.1497	135.21	3.6256
300.43	4.2198	136.04	3.6708	302.07	4.2164	139.55	3.6761	298.03	4.2035	137.7	3.6748	286.44	4.1444	135.62	3.6232	277.88	4.1925	134.66	3.578	269.93	4.1499	135.56	3.6245
300.9	4.2209	136.39	3.6698	302.16	4.2165	139.9	3.6751	298.5	4.2047	137.79	3.6745	286.91	4.1457	135.97	3.622	278.07	4.1928	134.75	3.5778	270.31	4.151	135.65	3.6241
301.27	4.2219	136.48	3.6695	302.54	4.2175	139.99	3.6748	298.88	4.2057	138.14	3.6734	287.38	4.1468	136.06	3.6217	278.44	4.1939	135.1	3.5767	270.4	4.1513	136	3.623
301.37	4.222	136.83	3.6685	302.63	4.2178	140.42	3.6735	298.97	4.2059	138.23	3.6732	287.75	4.1478	136.5	3.6204	278.54	4.1941	135.19	3.5764	270.78	4.1524	136.08	3.6227
301.74	4.223	136.91	3.6682	303.1	4.2189	140.86	3.6724	299.44	4.207	138.58	3.6722	287.85	4.1481	136.94	3.6191	278.82	4.1951	135.54	3.5752	270.87	4.1526	136.43	3.6216
301.84	4.2233	137.26	3.6672	303.57	4.2201	141.21	3.6713	299.81	4.208	138.67	3.6719	288.32	4.1492	137.29	3.618	279	4.1955	135.62	3.5749	271.25	4.1537	136.52	3.6214
302.21	4.2243	137.35	3.6669	304.04	4.2212	141.3	3.6711	299.91	4.2083	139.1	3.6706	288.69	4.1502	137.37	3.6177	279.38	4.1965	136.06	3.5736	271.34	4.1541	136.78	3.6204
302.3	4.2244	137.7	3.6659	304.41	4.2222	141.65	3.67	300.38	4.2094	139.54	3.6693	288.78	4.1503	137.72	3.6167	279.47	4.1968	136.41	3.5725	271.81	4.1554	136.96	3.6198
302.68	4.2254	137.79	3.6656	304.5	4.2225	141.74	3.6698	300.85	4.2106	139.98	3.668	289.16	4.1513	137.81	3.6164	279.85	4.1978	136.5	3.5723	272.18	4.1565	137.31	3.6187
302.77	4.2256	138.14	3.6645	304.88	4.2235	142.17	3.6685	301.31	4.2118	140.42	3.6668	289.25	4.1516	138.16	3.6154	279.94	4.1981	136.85	3.5711	272.28	4.1566	137.4	3.6183
303.24	4.2269	138.22	3.6643	304.97	4.2236	142.61	3.6672	301.78	4.213	140.77	3.6658	289.63	4.1526	138.25	3.6151	280.32	4.1991	136.94	3.5709	272.65	4.1578	137.75	3.6172
303.71	4.228	138.66	3.663	305.35	4.2246	142.96	3.6661	302.25	4.2141	140.85	3.6655	289.72	4.1528	138.6	3.614	280.41	4.1994	137.29	3.5698	272.75	4.1581	137.83	3.6169
304.08	4.229	139.1	3.6618	305.44	4.2248	143.05	3.6659	302.63	4.2151	141.2	3.6645	290.19	4.1541	138.69	3.6138	280.79	4.2005	137.37	3.5694	273.12	4.1592	138.18	3.6158
304.18	4.2291	139.45	3.6608	305.82	4.2259	143.48	3.6647	302.72	4.2154	141.29	3.6642	290.66	4.1554	139.04	3.6127	280.88	4.2007	137.72	3.5683	273.21	4.1594	138.27	3.6154
304.55	4.2301	139.54	3.6605	305.91	4.2262	143.83	3.6637	303.09	4.2164	141.64	3.6632	291.13	4.1565	139.12	3.6124	281.25	4.2018	137.81	3.5681	273.5	4.1604	138.62	3.6143
304.65	4.2304	139.89	3.6595	306.38	4.2273	143.92	3.6634	303.19	4.2165	141.73	3.6629	291.6	4.1578	139.47	3.6114	281.35	4.2022	138.16	3.567	273.68	4.1608	138.71	3.614
305.02	4.2314	139.97	3.6592	306.75	4.2283	144.27	3.6624	303.56	4.2175	142.08	3.6619	292.06	4.1589	139.56	3.6111	281.82	4.2035	138.25	3.5667	274.06	4.1618	139.06	3.6129
305.11	4.2315	140.32	3.6582	306.85	4.2286	144.36	3.6622	303.66	4.2178	142.17	3.6618	292.44	4.1599	139.91	3.6101	282.19	4.2046	138.6	3.5656	274.15	4.1621	139.15	3.6125
305.49	4.2325	140.41	3.6579	307.32	4.2298	144.71	3.6611	304.03	4.2188	142.52	3.6606	292.53	4.1602	140	3.6098	282.28	4.2047	138.69	3.5652	274.53	4.1633	139.5	3.6114
305.58	4.2328	140.76	3.6569	307.78	4.2309	144.8	3.6608	304.13	4.2189	142.6	3.6605	292.91	4.1612	140.35	3.6088	282.66	4.2059	139.12	3.564	274.62	4.1636	139.58	3.6111
305.96	4.2338	140.85	3.6566	308.16	4.2319	145.15	3.6598	304.5	4.2199	142.95	3.6593	293	4.1613	140.43	3.6085	282.75	4.206	139.47	3.5628	275	4.1646	139.94	3.6099
306.05	4.234	141.2	3.6556	308.25	4.2322	145.23	3.6597	304.59	4.2202	143.04	3.6592	293.38	4.1623	140.78	3.6074	283.03	4.207	139.56	3.5625	275.09	4.1649	140.02	3.6096
306.52	4.2351	141.29	3.6555	308.63	4.2333	145.58	3.6587	304.97	4.2212	143.39	3.658	293.47	4.1626	140.87	3.6072	283.22	4.2075	139.91	3.5614	275.46	4.166	140.37	3.6085
306.9	4.2362	141.64	3.6545	308.72	4.2335	145.67	3.6584	305.06	4.2214	143.48	3.6579	293.84	4.1636	141.13	3.6062	283.6	4.2085	140	3.561	275.56	4.1663	140.46	3.6082
306.99	4.2364	141.72	3.6542	309.19	4.2346	146.02	3.6574	305.44	4.2225	143.83	3.6569	293.94	4.1639	141.31	3.6059	283.69	4.2088	140.44	3.5598	275.93	4.1675	140.81	3.607
307.36	4.2374	142.07	3.6532	309.56	4.2356	146.11	3.6571	305.53	4.2227	143.91	3.6566	294.31	4.1649	141.66	3.6048	284.07	4.2099	140.79	3.5586	276.03	4.1676	140.9	3.6067
307.46	4.2375	142.16	3.6529	309.66	4.2359	146.46	3.6561	306	4.2238	144.26	3.6556	294.41	4.165	141.75	3.6045	284.16	4.2102	140.87	3.5583	276.4	4.1687	141.25	3.6056
307.83	4.2386	142.51	3.6519	310.03	4.2369	146.55	3.6558	306.37	4.2249	144.35	3.6553	294.78	4.1662	142.1	3.6035	284.53	4.2112	141.22	3.5572	276.5	4.1691	141.34	3.6054
307.93	4.2388	142.6	3.6516	310.13	4.2372	146.9	3.6548	306.47	4.2251	144.7	3.6543	294.88	4.1663	142.18	3.6032	284.63	4.2115	141.31	3.557	276.87	4.1702	141.69	3.6041
308.3	4.2398	142.95	3.6506	310.5	4.2382	146.98	3.6547	306.84	4.2261	144.79	3.654	295.25	4.1673	142.53	3.6022	285	4.2127	141.66	3.5559	276.96	4.1704	141.77	3.604
308.39	4.2401	143.04	3.6503	310.6	4.2383	147.33	3.6537	306.94	4.2262	145.14	3.653	295.34	4.1676	142.62	3.6019	285.1	4.2128	141.75	3.5556	277.34	4.1715	142.04	3.603
308.77	4.2411	143.39	3.6493	310.97	4.2393	147.42	3.6534	307.31	4.2273	145.23	3.6529	295.72	4.1686	142.97	3.6007	285.47	4.2139	142.1	3.5544	277.43	4.1718	142.21	3.6024
308.86	4.2412	143.47	3.6492	311.06	4.2396	147.77	3.6524	307.41	4.2275	145.58	3.6517	295.81	4.1689	143.06	3.6006	285.57	4.2141	142.19	3.5543	277.81	4.1729	142.56	3.6012
309.24	4.2422	143.74	3.6482	311.44	4.2406	147.86	3.6521	307.78	4.2286	145.66	3.6516	296.19	4.1699	143.41	3.5995	285.94	4.2154	142.54	3.5531	277.9	4.1731	142.65	3.6011
309.33	4.2425	143.91	3.6479	311.53	4.2409	148.21	3.6511	307.87	4.2288	146.01	3.6505	296.28	4.17	143.5	3.5993	286.03	4.2156	142.62	3.5528	278.18	4.1741	142.91	3.6001
309.71	4.2435	144.26	3.6467	311.91	4.2419	148.3	3.6508	308.25	4.2298	146.1	3.6503	296.66	4.1712	143.85	3.5982	286.41	4.2167	142.97	3.5517	278.37	4.1746	143.09	3.5995
309.8	4.2436	144.35	3.6466	312	4.2422	148.65	3.6498	308.34	4.2301	146.45	3.6492	296.75	4.1713	143.93	3.598	286.5	4.2169	143.06	3.5515	278.74	4.1757	143.44	3.5985
310.17	4.2446	144.7	3.6456	312.38	4.2432	148.73	3.6496	308.72	4.2311	146.54	3.649	297.12	4.1723	144.28	3.5969	286.88	4.218	143.41	3.5504	278.84	4.176	143.52	3.5982
310.27	4.2449	144.79	3.6453	312.47	4.2433	149.08	3.6485	308.81	4.2314	146.89	3.648	297.22	4.1726	144.37	3.5967	286.97	4.2183	143.5	3.5501	279.21	4.177	143.79	3.5972
310.64	4.2461	145.14	3.6443	312.84	4.2445	149.17	3.6484	309.28	4.2325	146.98	3.6479	297.59	4.1736	144.72	3.5956	287.35	4.2194	143.85	3.5489	279.31	4.1773	143.96	3.5967
310.74	4.2462	145.22	3.644	312.94	4.2446	149.52	3.6474	309.65	4.2335	147.33	3.6467	297.69	4.1739	144.81	3.5953	287.44	4.2198	143.94	3.5488	279.59	4.1783	144.31	3.5954
311.11	4.2472	145.57	3.643	313.31	4.2456	149.61	3.6471	309.75	4.2338	147.41	3.6464	298.06	4.1749	145.16	3.5943	287.91	4.2209	144.29	3.5476	279.78	4.1788	144.4	3.5953
311.21	4.2475	145.66	3.6427	313.41	4.2459	149.96	3.6461	310.12	4.2348	147.85	3.6453	298.16	4.1752	145.25	3.5941	288.19	4.2219	144.37	3.5473	280.15	4.1799	144.75	3.5941
311.58	4.2485	146.01	3.6417	313.78	4.247	150.05	3.6459	310.22	4.2351	148.2	3.6442	298.53	4.1762	145.6	3.593	288.38	4.2223	144.72	3.5462	280.24	4.1802	144.84	3.5938
311.67	4.2486	146.1	3.6416	313.88	4.2472	150.4	3.6448	310.59	4.2361	148.29	3.644	298.62	4.1763	145.68	3.5927	288.75	4.2235	144.81	3.546	280.62	4.1813	145.19	3.5927
312.05	4.2498	146.45	3.6404	314.25	4.2482	150.48	3.6446	310.68	4.2362	148.64	3.643	299	4.1775	146.03	3.5917	288.85	4.2236	145.16	3.5449	280.71	4.1815	145.27	3.5924
312.14	4.2499	146.54	3.6403	314.34	4.2485	150.83	3.6435	311.06	4.2374	148.73	3.6427	299.09	4.1776	146.12	3.5914	289.13	4.2246	145.25	3.5447	281.09	4.1826	145.62	3.5912
312.24	4.2503	146.89	3.6393	314.72	4.2495	150.92	3.6434	311.15	4.2375	149.08	3.6417	299.47	4.1788	146.47	3.5903	289.31	4.2251	145.6	3.5436	281.18	4.183	145.71	3.5909
312.24	4.2496	146.97	3.639	314.81	4.2498	151.27	3.6424	311.53	4.2386	149.16	3.6416	299.56	4.1789	146.56	3.5901	289.69	4.2262	145.68	3.5433	281.65	4.1844	146.06	3.5898
312.33	4.2496	147.32	3.638	315	4.2503	151.36	3.6421	311.62	4.2388	149.51	3.6404	299.94	4.1799	146.91	3.5891	289.78	4.2264	146.03	3.5422	282.03	4.1854	146.15	3.5896
312.7	4.2496	147.41	3.6377	315	4.2496	151.71	3.6411	312	4.2398	149.6	3.6403	300.03	4.1802	147	3.5888	290.16	4.2275	146.12	3.5418	282.12	4.1857	146.41	3.5886
313.15	4.2496	147.76	3.6367	315.09	4.2496	151.8	3.6409	312.09	4.2401	149.95	3.6393	300.4	4.1813	147.35	3.5878	290.25	4.2278	146.56	3.5405	282.4	4.1867	146.59	3.5882
313.6	4.2496	147.85	3.6364	315.46	4.2498	152.15	3.6398	312.47	4.2411	150.04	3.639	300.5	4.1815	147.43	3.5875	290.63	4.229	146.91	3.5394	282.59	4.1872	146.85	3.5872
314.04	4.2496	148.2	3.6354	315.91	4.2498	152.23	3.6396	312.56	4.2414	150.39	3.638	300.87	4.1825	147.78	3.5865	290.72	4.2291	147	3.5393	282.96	4.1883	147.02	3.5867
314.48	4.2498	148.29	3.6353	316.36	4.2498	152.67	3.6384	312.93	4.2424	150.48	3.6377	300.97	4.1828	147.87	3.5862	291.09	4.2302	147.26	3.5383	283.06	4.1886	147.37	3.5856
314.91	4.2496	148.64	3.6343	316.8	4.2496	153.02	3.6374	313.03	4.2427	150.83	3.6367	301.34	4.1838	148.31	3.5849	291.19	4.2306	147.43	3.5378	283.43	4.1897	147.46	3.5853
315.34	4.2496	148.72	3.634	317.24	4.2496	153.11	3.6371	313.5	4.244	150.91	3.6364	301.44	4.1841	148.75	3.5836	291.56	4.2317	147.78	3.5367	283.52	4.1901	147.81	3.5841
315.77	4.2498	149.07	3.633	317.67	4.2498	153.46	3.6361	313.96	4.2451	151.26	3.6354	301.81	4.1851	149.18	3.5823	291.66	4.2319	147.87	3.5364	283.9	4.1912	147.9	3.5838
316.19	4.2498	149.16	3.6327	318.09	4.2498	153.55	3.6358	314.34	4.2462	151.35	3.6353	301.9	4.1852	149.62	3.5811	292.03	4.233	148.22	3.5354	283.99	4.1915	148.25	3.5827
316.6	4.2496	149.51	3.6317	318.52	4.2496	153.98	3.6346	314.43	4.2464	151.7	3.6342	302.28	4.1863	149.97	3.5801	292.13	4.2333	148.31	3.5351	284.37	4.1925	148.34	3.5823
317.02	4.2496	149.6	3.6316	318.94	4.2498	154.42	3.6333	314.81	4.2475	151.79	3.634	302.37	4.1867	150.06	3.5799	292.5	4.2344	148.66	3.5339	284.46	4.1928	148.69	3.5812
317.43	4.2496	149.95	3.6304	319.35	4.2496	154.86	3.6322	314.9	4.2478	152.14	3.633	302.84	4.188	150.41	3.5788	292.59	4.2348	148.75	3.5338	284.84	4.1939	148.77	3.5809
317.83	4.2498	150.04	3.6303	319.76	4.2498	155.21	3.6312	315.28	4.2488	152.23	3.6327	303.31	4.1892	150.5	3.5785	293.06	4.2362	149.1	3.5326	284.93	4.1943	149.12	3.5798
318.24	4.2498	150.39	3.6293	320.17	4.2496	155.3	3.6309	315.37	4.2491	152.58	3.6317	303.68	4.1902	150.85	3.5775	293.44	4.2372	149.18	3.5325	285.31	4.1954	149.21	3.5794
318.64	4.2496	150.47	3.629	320.57	4.2496	155.73	3.6298	315.74	4.2501	152.66	3.6316	303.78	4.1905	150.93	3.5773	293.53	4.2375	149.53	3.5314	285.4	4.1957	149.56	3.5783
319.03	4.2496	150.82	3.628	320.98	4.2498	156.08	3.6288	315.74	4.2496	153.01	3.6304	304.15	4.1915	151.28	3.5762	293.91	4.2386	149.62	3.531	285.77	4.1968	149.65	3.5782
319.42	4.2496	150.91	3.6277	321.37	4.2498	156.17	3.6285	315.83	4.2496	153.1	3.6303	304.25	4.1918	151.37	3.5761	294	4.239	149.97	3.5299	285.87	4.1972	149.91	3.5772
319.81	4.2496	151.26	3.6267	321.77	4.2498	156.52	3.6275	316.2	4.2498	153.45	3.6292	304.62	4.1928	151.72	3.5749	294.37	4.2401	150.06	3.5296	286.24	4.1983	150.09	3.5767
320.2	4.2498	151.35	3.6266	322.15	4.2498	156.61	3.6272	316.65	4.2498	153.54	3.629	304.72	4.1931	151.81	3.5748	294.47	4.2403	150.41	3.5286	286.34	4.1986	150.35	3.5757
320.58	4.2496	151.7	3.6254	322.54	4.2498	156.96	3.6262	317.1	4.2498	153.89	3.628	305.09	4.1941	152.16	3.5736	294.84	4.2414	150.5	3.5283	286.71	4.1997	150.52	3.5752
320.96	4.2496	151.78	3.6253	322.92	4.2496	157.05	3.6261	317.54	4.2496	153.98	3.6277	305.18	4.1944	152.25	3.5735	294.94	4.2417	150.85	3.5273	286.81	4.1999	150.87	3.5741
321.34	4.2496	152.13	3.6243	323.3	4.2496	157.4	3.6251	317.98	4.2498	154.33	3.6267	305.56	4.1955	152.6	3.5725	295.31	4.2428	150.93	3.527	287.09	4.2009	150.96	3.5738
321.71	4.2496	152.22	3.624	323.68	4.2498	157.48	3.6248	318.41	4.2498	154.41	3.6266	305.65	4.1957	152.68	3.5722	295.41	4.2432	151.28	3.5259	287.27	4.2014	151.31	3.5727
322.08	4.2498	152.57	3.623	324.05	4.2496	157.83	3.6238	318.84	4.2498	154.76	3.6256	306.03	4.1968	153.03	3.5712	295.78	4.2443	151.37	3.5257	287.65	4.2025	151.4	3.5723
322.45	4.2496	152.66	3.6227	324.42	4.2498	157.92	3.6235	319.26	4.2498	154.85	3.6253	306.12	4.197	153.12	3.5709	295.87	4.2445	151.63	3.5247	287.74	4.2028	151.75	3.5712
322.81	4.2496	153.1	3.6216	324.79	4.2498	158.36	3.6224	319.68	4.2496	155.2	3.6243	306.5	4.198	153.47	3.5699	296.25	4.2456	151.81	3.5242	288.02	4.2038	151.84	3.5711
323.17	4.2496	153.45	3.6206	325.15	4.2498	158.71	3.6214	320.1	4.2498	155.29	3.624	306.59	4.1983	153.56	3.5696	296.34	4.2459	152.25	3.523	288.21	4.2043	152.1	3.5701
323.53	4.2496	153.53	3.6203	325.51	4.2498	158.8	3.6211	320.51	4.2498	155.64	3.623	306.96	4.1994	153.91	3.5686	296.72	4.247	152.6	3.5218	288.59	4.2054	152.27	3.5696
323.88	4.2496	153.88	3.6193	325.87	4.2496	159.15	3.6201	320.92	4.2496	155.73	3.6229	307.06	4.1996	154	3.5685	296.81	4.2472	152.68	3.5217	288.68	4.2057	152.62	3.5685
324.24	4.2498	153.97	3.6191	326.22	4.2498	159.23	3.62	321.32	4.2496	156.08	3.6217	307.43	4.2007	154.35	3.5673	297.09	4.2482	153.03	3.5205	289.05	4.2068	152.71	3.5681
324.59	4.2496	154.41	3.6179	326.57	4.2496	159.58	3.6188	321.72	4.2496	156.16	3.6216	307.53	4.201	154.43	3.5672	297.28	4.2486	153.12	3.5202	289.15	4.2072	153.06	3.567
324.93	4.2496	154.76	3.6169	326.92	4.2498	159.67	3.6187	322.12	4.2498	156.51	3.6206	307.9	4.202	154.78	3.566	297.56	4.2496	153.47	3.5192	289.52	4.2083	153.15	3.5667
325.28	4.2498	154.85	3.6167	327.26	4.2496	160.02	3.6177	322.51	4.2496	156.6	3.6203	308	4.2023	154.87	3.5659	297.75	4.2501	153.56	3.5189	289.62	4.2086	153.5	3.5656
325.62	4.2496	155.2	3.6156	327.6	4.2498	160.11	3.6175	322.9	4.2496	156.95	3.6193	308.37	4.2033	155.22	3.5649	297.75	4.2501	153.91	3.5178	289.99	4.2097	153.59	3.5652
325.96	4.2496	155.28	3.6154	327.94	4.2496	160.55	3.6162	323.28	4.2496	157.04	3.6191	308.46	4.2036	155.31	3.5646	297.84	4.2501	154	3.5176	290.09	4.2101	154.02	3.564
326.29	4.2496	155.72	3.6141	328.28	4.2498	160.98	3.6149	323.67	4.2496	157.48	3.6179	308.84	4.2046	155.66	3.5636	298.22	4.2501	154.35	3.5165	290.46	4.2112	154.37	3.5628
326.62	4.2496	156.16	3.613	328.61	4.2496	161.42	3.6138	324.05	4.2496	157.83	3.6169	308.93	4.2049	155.75	3.5633	298.68	4.2501	154.43	3.5162	290.55	4.2115	154.46	3.5625
326.95	4.2496	156.51	3.6119	328.94	4.2496	161.86	3.6125	324.42	4.2498	157.91	3.6167	309.31	4.206	156.1	3.5623	299.13	4.2501	154.78	3.5152	290.93	4.2127	154.81	3.5614
327.28	4.2498	156.6	3.6117	329.27	4.2496	162.3	3.6114	324.79	4.2496	158.26	3.6156	309.4	4.2062	156.18	3.5622	299.59	4.2501	154.87	3.5149	291.02	4.213	154.9	3.5612
327.61	4.2496	157.03	3.6104	329.59	4.2496	162.65	3.6104	325.16	4.2498	158.35	3.6154	309.78	4.2073	156.53	3.561	300.03	4.2501	155.22	3.5138	291.4	4.2141	155.16	3.5602
327.93	4.2496	157.47	3.6093	329.92	4.2498	162.73	3.6103	325.53	4.2498	158.79	3.6141	309.87	4.2077	156.62	3.5609	300.48	4.2501	155.31	3.5136	291.49	4.2144	155.34	3.5598
328.25	4.2498	157.82	3.6083	330.24	4.2496	163.08	3.6091	325.89	4.2498	159.23	3.613	310.34	4.2089	156.97	3.5598	300.92	4.2501	155.66	3.5126	291.87	4.2156	155.6	3.5588
328.57	4.2496	157.91	3.608	330.55	4.2498	163.17	3.609	326.25	4.2498	159.58	3.6119	310.71	4.2101	157.06	3.5596	301.36	4.2501	155.75	3.5123	291.96	4.2159	155.78	3.5583
328.88	4.2496	158.26	3.607	330.87	4.2496	163.52	3.608	326.6	4.2496	159.66	3.6117	310.81	4.2102	157.41	3.5586	301.79	4.2501	156.1	3.5112	292.34	4.217	156.13	3.5572
329.07	4.2498	158.35	3.6069	330.93	4.2498	163.61	3.6077	326.96	4.2496	160.1	3.6104	311.18	4.2114	157.5	3.5583	302.22	4.2501	156.18	3.5109	292.43	4.2173	156.21	3.5568
329.07	4.2496	158.7	3.6059	330.93	4.2496	163.96	3.6067	327.31	4.2498	160.54	3.6093	311.28	4.2117	157.85	3.5573	302.65	4.2501	156.53	3.5099	292.71	4.2183	156.56	3.5557
329.13	4.2496	158.78	3.6056	330.99	4.2496	164.05	3.6066	327.65	4.2498	160.89	3.6083	311.65	4.2127	157.93	3.5572	303.07	4.2501	156.62	3.5096	292.9	4.2188	156.65	3.5554
329.38	4.2499	159.13	3.6046	331.24	4.2499	164.4	3.6056	328	4.2496	160.97	3.6082	311.74	4.213	158.28	3.556	303.49	4.2501	156.97	3.5086	293.18	4.2198	157	3.5544
329.69	4.2504	159.22	3.6045	331.55	4.2504	164.48	3.6053	328.34	4.2498	161.32	3.607	312.12	4.2141	158.37	3.5559	303.91	4.2501	157.06	3.5083	293.37	4.2202	157.09	3.5541
330.01	4.2509	159.57	3.6033	331.87	4.2509	164.92	3.6041	328.68	4.2496	161.41	3.6069	312.21	4.2143	158.72	3.5549	304.32	4.2501	157.41	3.5071	293.65	4.2212	157.44	3.553
330.32	4.2514	159.66	3.6032	332.18	4.2516	165.36	3.603	329.01	4.2496	161.76	3.6059	312.59	4.2154	158.81	3.5546	304.73	4.2501	157.5	3.507	293.83	4.2217	157.53	3.5527
330.63	4.252	160.01	3.6022	332.49	4.2522	165.71	3.6019	329.34	4.2496	161.85	3.6056	312.68	4.2157	159.16	3.5536	305.14	4.2501	157.85	3.5059	294.12	4.2227	157.88	3.5515
330.94	4.2527	160.1	3.602	332.8	4.2528	165.8	3.6017	329.67	4.2498	162.2	3.6046	313.06	4.2169	159.25	3.5535	305.55	4.2501	157.93	3.5055	294.3	4.2231	157.96	3.5514
331.26	4.2533	160.53	3.6007	333.12	4.2535	166.15	3.6007	330	4.2498	162.29	3.6045	313.15	4.217	159.6	3.5523	305.95	4.2501	158.28	3.5044	294.58	4.2241	158.23	3.5504
331.57	4.254	160.97	3.5995	333.43	4.2541	166.23	3.6004	330.32	4.2496	162.64	3.6035	313.53	4.2181	159.68	3.5522	306.35	4.2501	158.37	3.5044	294.77	4.2246	158.4	3.5499
331.88	4.2548	161.32	3.5985	333.74	4.2549	166.67	3.5993	330.64	4.2498	162.72	3.6032	313.62	4.2183	160.03	3.5512	306.74	4.2501	158.63	3.5034	295.05	4.2256	158.75	3.5488
332.19	4.2556	161.41	3.5983	334.05	4.2556	167.02	3.5983	330.96	4.2498	163.07	3.6022	313.99	4.2194	160.12	3.5509	307.13	4.2501	158.81	3.5029	295.24	4.2261	158.84	3.5485
332.5	4.2562	161.85	3.5972	334.36	4.2564	167.11	3.5982	331.28	4.2498	163.16	3.602	314.09	4.2196	160.47	3.5499	307.52	4.2501	159.25	3.5017	295.62	4.2273	159.19	3.5473
332.82	4.257	162.2	3.5961	334.68	4.2572	167.46	3.597	331.53	4.2496	163.6	3.6007	314.37	4.2206	160.56	3.5496	307.91	4.2501	159.6	3.5005	295.71	4.2275	159.28	3.547
333.13	4.2579	162.28	3.5959	334.99	4.258	167.55	3.5969	331.53	4.2496	164.04	3.5995	314.56	4.221	160.91	3.5486	308.29	4.2501	159.68	3.5004	295.99	4.2285	159.63	3.546
333.44	4.2587	162.63	3.5949	335.3	4.2588	167.9	3.5959	331.59	4.2496	164.39	3.5985	314.93	4.2222	161	3.5485	308.67	4.2501	160.03	3.4992	296.18	4.2291	159.71	3.5457
333.75	4.2595	162.72	3.5946	335.61	4.2598	167.98	3.5957	331.84	4.2499	164.47	3.5983	315.02	4.2223	161.35	3.5475	309.05	4.2501	160.12	3.4991	296.46	4.2301	159.98	3.5447
334.06	4.2603	163.07	3.5936	335.92	4.2606	168.42	3.5945	332.15	4.2506	164.91	3.597	315.4	4.2235	161.43	3.5472	309.42	4.2501	160.47	3.4979	296.65	4.2306	160.15	3.5443
334.38	4.2611	163.16	3.5935	336.24	4.2614	168.86	3.5933	332.47	4.2511	165.35	3.5959	315.49	4.2238	161.78	3.5462	309.8	4.2501	160.56	3.4976	297.02	4.2317	160.5	3.5431
334.69	4.262	163.51	3.5925	336.55	4.2622	169.3	3.592	332.78	4.2517	165.7	3.5949	315.87	4.2248	161.87	3.5459	310.17	4.2501	161	3.4963	297.12	4.232	160.59	3.543
335	4.2629	163.59	3.5924	336.86	4.2632	169.73	3.5909	333.09	4.2524	165.79	3.5948	315.96	4.2251	162.22	3.5449	310.53	4.2501	161.43	3.495	297.4	4.233	160.94	3.5418
335.31	4.2637	163.94	3.5914	337.17	4.264	170.08	3.5899	333.4	4.253	166.14	3.5936	316.34	4.2262	162.31	3.5447	310.9	4.2503	161.78	3.4939	297.58	4.2335	161.03	3.5415
335.63	4.2645	164.03	3.5911	337.49	4.265	170.17	3.5898	333.72	4.2537	166.22	3.5935	316.43	4.2265	162.75	3.5435	311.26	4.2501	161.87	3.4937	297.96	4.2348	161.38	3.5404
335.94	4.2654	164.38	3.5901	337.8	4.2658	170.52	3.5888	334.03	4.2545	166.57	3.5925	316.81	4.2277	163.18	3.5423	311.62	4.2501	162.22	3.4926	298.05	4.2349	161.46	3.5402
336.25	4.2664	164.47	3.5899	338.11	4.2667	170.61	3.5886	334.34	4.2551	166.66	3.5922	316.9	4.228	163.62	3.541	311.97	4.2501	162.31	3.4923	298.33	4.2359	161.81	3.5391
336.56	4.2672	164.91	3.5886	338.42	4.2675	170.96	3.5875	334.65	4.2559	167.1	3.5911	317.27	4.229	164.06	3.5399	312.32	4.2501	162.75	3.4912	298.52	4.2365	161.9	3.5388
336.87	4.268	165.34	3.5875	338.73	4.2685	171.05	3.5874	334.96	4.2567	167.45	3.5901	317.37	4.2293	164.41	3.5389	312.67	4.2501	163.1	3.49	298.9	4.2377	162.25	3.5376
337.19	4.269	165.69	3.5865	339.05	4.2695	171.4	3.5864	335.28	4.2575	167.54	3.5898	317.84	4.2306	164.5	3.5386	313.02	4.2501	163.18	3.4899	298.99	4.238	162.34	3.5375
337.5	4.2698	165.78	3.5862	339.36	4.2703	171.48	3.5862	335.59	4.2583	167.89	3.5888	318.21	4.2317	164.85	3.5376	313.37	4.2501	163.45	3.4889	299.36	4.2391	162.6	3.5365
337.81	4.2709	166.22	3.5851	339.67	4.2712	171.92	3.5849	335.9	4.2591	167.97	3.5886	318.3	4.232	164.93	3.5373	313.71	4.2501	163.62	3.4886	299.46	4.2394	162.78	3.536
338.12	4.2716	166.57	3.5841	339.98	4.2721	172.36	3.5838	336.21	4.2599	168.41	3.5875	318.68	4.2332	165.37	3.5362	314.05	4.2501	163.97	3.4875	299.74	4.2404	163.13	3.5349
338.43	4.2725	166.66	3.584	340.29	4.273	172.71	3.5828	336.53	4.2609	168.76	3.5865	318.77	4.2333	165.72	3.5352	314.39	4.2501	164.06	3.4873	299.93	4.2411	163.21	3.5346
338.75	4.2735	167.01	3.583	340.61	4.274	172.79	3.5825	336.84	4.2617	168.85	3.5862	319.15	4.2344	165.81	3.5349	314.72	4.2501	164.41	3.4862	300.3	4.2422	163.56	3.5336
339.06	4.2745	167.09	3.5827	340.92	4.275	173.23	3.5814	337.15	4.2625	169.29	3.5851	319.24	4.2348	166.25	3.5338	315.05	4.2501	164.5	3.486	300.4	4.2425	163.65	3.5333
339.37	4.2753	167.44	3.5817	341.23	4.2758	173.58	3.5804	337.46	4.2635	169.64	3.5841	319.71	4.2361	166.6	3.5328	315.38	4.2501	164.85	3.4849	300.77	4.2436	164	3.5322
339.68	4.2763	167.53	3.5815	341.54	4.2767	173.67	3.5803	337.77	4.2643	169.72	3.5838	320.09	4.2372	166.68	3.5326	315.71	4.2501	164.93	3.4845	300.86	4.244	164.09	3.5318
340	4.2771	167.97	3.5803	341.86	4.2777	174.02	3.5793	338.09	4.2653	170.07	3.5828	320.18	4.2375	167.12	3.5314	316.04	4.2503	165.37	3.4834	301.24	4.2451	164.53	3.5304
340.31	4.278	168.41	3.5791	342.17	4.2785	174.11	3.579	338.4	4.2661	170.16	3.5827	320.55	4.2386	167.47	3.5304	316.36	4.2501	165.72	3.4823	301.33	4.2454	164.88	3.5294
340.62	4.279	168.84	3.578	342.48	4.2795	174.54	3.5778	338.71	4.2671	170.51	3.5817	320.65	4.239	167.56	3.5302	316.68	4.2501	165.81	3.4821	301.61	4.2464	164.96	3.5291
340.93	4.28	169.19	3.577	342.79	4.2804	174.98	3.5767	339.02	4.2679	170.6	3.5814	321.02	4.2401	168	3.5289	317	4.2501	166.16	3.481	301.8	4.2469	165.31	3.528
341.24	4.2808	169.28	3.5767	343.1	4.2814	175.33	3.5757	339.33	4.2688	170.95	3.5804	321.12	4.2403	168.43	3.5278	317.31	4.2501	166.25	3.4808	302.18	4.2482	165.4	3.5278
341.56	4.2817	169.63	3.5757	343.42	4.2824	175.42	3.5756	339.65	4.2698	171.04	3.5803	321.49	4.2414	168.78	3.5268	317.63	4.2501	166.6	3.4797	302.27	4.2485	165.75	3.5267
341.87	4.2827	169.72	3.5754	343.73	4.2832	175.77	3.5746	339.96	4.2708	171.39	3.5791	321.58	4.2417	168.87	3.5267	317.69	4.2501	166.68	3.4795	302.65	4.2496	165.84	3.5263
342.18	4.2837	170.07	3.5744	344.04	4.2842	175.86	3.5743	340.27	4.2716	171.47	3.579	321.96	4.2428	169.22	3.5257	317.69	4.2501	167.03	3.4784	302.74	4.2499	166.28	3.5251
342.49	4.2846	170.16	3.5743	344.35	4.2851	176.29	3.5731	340.58	4.2725	171.91	3.5778	322.05	4.2432	169.31	3.5254	317.75	4.2501	167.12	3.4781	302.83	4.2501	166.63	3.5239
342.8	4.2856	170.51	3.5733	344.66	4.2861	176.73	3.572	340.9	4.2735	172.35	3.5765	322.52	4.2445	169.75	3.5242	318	4.2507	167.47	3.4771	302.83	4.2503	166.71	3.5236
343.12	4.2864	170.59	3.5731	344.98	4.2871	177.17	3.5707	341.21	4.2745	172.79	3.5754	322.9	4.2456	170.18	3.5231	318.31	4.2516	167.56	3.477	302.92	4.2503	167.06	3.5225
343.43	4.2874	171.03	3.572	345.29	4.288	177.61	3.5696	341.52	4.2753	173.14	3.5744	322.99	4.2459	170.62	3.5218	318.63	4.2522	167.91	3.4758	303.3	4.2506	167.15	3.5223
343.74	4.2884	171.47	3.5707	345.6	4.289	177.96	3.5686	341.83	4.2763	173.22	3.5743	323.37	4.247	171.06	3.5207	318.94	4.2532	168	3.4755	303.75	4.2506	167.5	3.5212
344.05	4.2893	171.91	3.5696	345.91	4.29	178.04	3.5685	342.14	4.2772	173.57	3.5733	323.46	4.2474	171.41	3.5197	319.25	4.2538	168.35	3.4745	304.2	4.2506	167.59	3.521
344.37	4.2903	172.26	3.5686	346.23	4.2909	178.39	3.5675	342.46	4.278	173.66	3.573	323.83	4.2485	171.5	3.5196	319.56	4.2548	168.43	3.4742	304.65	4.2506	167.94	3.5199
344.68	4.2913	172.34	3.5683	346.54	4.2917	178.48	3.5673	342.77	4.279	174.01	3.572	323.93	4.2486	171.85	3.5186	319.88	4.2556	168.87	3.4729	305.08	4.2506	168.03	3.5196
344.99	4.2922	172.78	3.5673	346.85	4.2929	178.92	3.566	343.08	4.28	174.1	3.5719	324.21	4.2496	171.93	3.5183	320.19	4.2566	169.31	3.4718	305.51	4.2506	168.38	3.5184
345.3	4.2932	173.13	3.5662	347.16	4.2937	179.36	3.5649	343.39	4.2809	174.45	3.5709	324.4	4.2501	172.28	3.5173	320.5	4.2574	169.66	3.4708	305.94	4.2507	168.46	3.5183
345.61	4.294	173.22	3.566	347.47	4.2947	179.79	3.5638	343.7	4.2817	174.54	3.5706	324.4	4.2499	172.37	3.5171	320.81	4.2583	169.75	3.4705	306.36	4.2507	168.81	3.5171
345.93	4.295	173.66	3.5649	347.79	4.2956	180.14	3.5628	343.95	4.2827	174.97	3.5694	324.49	4.2499	172.81	3.516	321.12	4.2593	170.1	3.4694	306.78	4.2506	168.9	3.5168
346.24	4.2959	174.09	3.5638	348.1	4.2966	180.23	3.5627	344.02	4.2827	175.41	3.5683	324.86	4.2499	173.25	3.5147	321.44	4.2603	170.18	3.4692	307.19	4.2506	169.25	3.5157
346.55	4.2969	174.44	3.5628	348.41	4.2976	180.58	3.5617	344.33	4.2837	175.76	3.5673	325.32	4.2499	173.68	3.5136	321.75	4.2611	170.53	3.4681	307.6	4.2506	169.34	3.5155
346.86	4.2979	174.53	3.5625	348.72	4.2985	180.67	3.5615	344.64	4.2846	175.85	3.567	325.76	4.2499	174.12	3.5125	322.06	4.262	170.62	3.4679	308	4.2506	169.69	3.5144
347.17	4.2989	174.88	3.5615	349.03	4.2995	181.11	3.5602	344.95	4.2856	176.29	3.5659	326.2	4.2499	174.47	3.5115	322.37	4.263	171.06	3.4666	308.4	4.2506	169.78	3.5141
347.49	4.2998	174.97	3.5614	349.35	4.3005	181.54	3.5591	345.27	4.2866	176.63	3.5649	326.64	4.2499	174.56	3.5113	322.69	4.264	171.5	3.4653	308.79	4.2506	170.13	3.5131
347.8	4.3008	175.32	3.5604	349.66	4.3014	181.89	3.5581	345.58	4.2876	176.72	3.5646	327.07	4.2499	175	3.5102	323	4.2648	171.93	3.4641	309.18	4.2506	170.22	3.5128
348.11	4.3018	175.41	3.5602	349.97	4.3024	181.98	3.558	345.89	4.2885	177.16	3.5636	327.5	4.2499	175.35	3.5092	323.31	4.2658	172.28	3.4631	309.56	4.2506	170.57	3.5117
348.42	4.3027	175.84	3.5589	350.28	4.3034	182.33	3.557	346.2	4.2895	177.6	3.5623	327.92	4.2499	175.43	3.5091	323.62	4.2669	172.37	3.4628	309.94	4.2506	170.65	3.5115
348.74	4.3035	176.28	3.5578	350.6	4.3043	182.42	3.5567	346.51	4.2905	178.03	3.5612	328.33	4.2499	175.78	3.5081	323.93	4.2677	172.72	3.4618	310.32	4.2506	171	3.5104
349.05	4.3045	176.72	3.5567	350.91	4.3053	182.86	3.5556	346.83	4.2914	178.38	3.5602	328.74	4.2499	175.87	3.5078	324.25	4.2688	172.81	3.4616	310.69	4.2506	171.09	3.51
349.36	4.3055	177.07	3.5557	351.22	4.3063	183.29	3.5544	347.14	4.2924	178.47	3.5599	329.15	4.2499	176.31	3.5067	324.56	4.2696	173.16	3.4605	311.06	4.2506	171.53	3.5088
349.67	4.3066	177.15	3.5556	351.53	4.3072	183.73	3.5533	347.45	4.2934	178.91	3.5588	329.55	4.2499	176.75	3.5055	324.87	4.2706	173.25	3.4603	311.43	4.2506	171.88	3.5078
349.98	4.3074	177.5	3.5546	351.84	4.3082	184.08	3.5523	347.76	4.2943	179.26	3.5578	329.95	4.2499	177.18	3.5044	325.18	4.2717	173.6	3.4592	311.79	4.2507	171.97	3.5075
350.3	4.3085	177.59	3.5544	352.16	4.3092	184.17	3.5522	348.07	4.2951	179.35	3.5577	330.34	4.2499	177.53	3.5034	325.5	4.2725	173.68	3.459	312.14	4.2506	172.32	3.5063
350.61	4.3093	178.03	3.5531	352.47	4.3101	184.52	3.5512	348.39	4.2963	179.7	3.5567	330.73	4.2499	177.62	3.5031	325.81	4.2737	174.12	3.4578	312.5	4.2506	172.4	3.5062
350.92	4.3105	178.47	3.552	352.78	4.3111	184.61	3.5509	348.7	4.2971	179.78	3.5565	331.11	4.2499	178.06	3.5021	326.12	4.2746	174.47	3.4568	312.84	4.2507	172.67	3.5052
351.23	4.3113	178.82	3.551	353.09	4.3121	185.04	3.5497	349.01	4.298	180.22	3.5552	331.49	4.2499	178.5	3.501	326.43	4.2754	174.56	3.4565	313.19	4.2506	172.84	3.5047
351.54	4.3122	178.9	3.5509	353.41	4.3131	185.48	3.5486	349.32	4.299	180.66	3.5541	331.87	4.2499	178.85	3.5	326.68	4.2764	174.91	3.4555	313.53	4.2507	173.28	3.5034
351.86	4.3132	179.34	3.5497	353.72	4.314	185.92	3.5475	349.64	4.3001	181.01	3.5531	332.24	4.2499	178.93	3.4999	326.74	4.2766	175	3.4553	313.87	4.2506	173.63	3.5023
352.17	4.3142	179.78	3.5486	354.03	4.315	186.27	3.5465	349.95	4.3009	181.1	3.553	332.61	4.2499	179.28	3.4989	327.06	4.2775	175.35	3.4542	314.21	4.2506	173.72	3.5021
352.48	4.3152	180.13	3.5476	354.34	4.316	186.36	3.5464	350.26	4.3019	181.45	3.552	332.97	4.2498	179.37	3.4987	327.37	4.2784	175.43	3.454	314.54	4.2506	174.07	3.501
352.79	4.3161	180.22	3.5473	354.65	4.3169	186.71	3.5454	350.57	4.303	181.53	3.5517	333.33	4.2499	179.81	3.4976	327.68	4.2795	175.87	3.4529	314.86	4.2506	174.15	3.5007
353.11	4.3171	180.65	3.5464	354.97	4.3179	186.79	3.5452	350.88	4.3039	181.97	3.5506	333.69	4.2499	180.25	3.4965	327.99	4.2804	176.13	3.4519	315.19	4.2506	174.5	3.4997
353.42	4.3181	181	3.5454	355.28	4.3189	187.23	3.5439	351.2	4.3048	182.32	3.5496	334.04	4.2499	180.6	3.4955	328.31	4.2814	176.31	3.4516	315.51	4.2506	174.59	3.4996
353.73	4.319	181.09	3.5451	355.59	4.3198	187.67	3.5428	351.51	4.3058	182.41	3.5494	334.39	4.2498	180.68	3.4952	328.62	4.2824	176.66	3.4505	315.83	4.2506	174.85	3.4986
354.04	4.3202	181.44	3.5441	355.9	4.3208	188.11	3.5417	351.82	4.3068	182.85	3.5483	334.73	4.2499	181.12	3.4941	328.93	4.2834	176.75	3.4503	316.14	4.2507	175.03	3.4981
354.35	4.3211	181.53	3.5439	356.21	4.3219	188.54	3.5405	352.13	4.3077	183.2	3.5473	335.07	4.2499	181.56	3.4929	329.24	4.2843	177.18	3.449	316.27	4.2506	175.38	3.497
354.67	4.3219	181.97	3.5428	356.53	4.3229	188.98	3.5394	352.45	4.3087	183.28	3.547	335.41	4.2499	182	3.492	329.55	4.2855	177.62	3.4479	316.33	4.2506	175.47	3.4968
354.92	4.3229	182.32	3.5418	356.84	4.3239	189.42	3.5383	352.76	4.3097	183.63	3.546	335.75	4.2499	182.35	3.491	329.87	4.2864	177.97	3.4468	316.58	4.2511	175.82	3.4957
354.98	4.3229	182.4	3.5417	357.15	4.3248	189.86	3.5372	353.07	4.3108	183.72	3.5459	336.08	4.2499	182.43	3.4908	330.18	4.2872	178.06	3.4466	316.89	4.2519	175.9	3.4955
355.23	4.3239	182.75	3.5407	357.46	4.3258	190.21	3.5362	353.38	4.3118	184.07	3.5449	336.4	4.2499	182.87	3.4897	330.49	4.2884	178.41	3.4455	317.21	4.2525	176.25	3.4944
355.29	4.324	182.84	3.5405	357.78	4.3268	190.29	3.536	353.69	4.3127	184.16	3.5447	336.73	4.2499	183.22	3.4887	330.8	4.2893	178.5	3.4453	317.52	4.2533	176.34	3.4941
355.6	4.325	183.28	3.5394	358.09	4.3277	190.73	3.5349	354.01	4.3137	184.6	3.5436	337.05	4.2499	183.31	3.4886	331.11	4.2903	178.93	3.4442	317.83	4.2541	176.69	3.4931
355.92	4.326	183.72	3.5383	358.4	4.3287	191.08	3.5339	354.32	4.3145	184.95	3.5426	337.37	4.2499	183.66	3.4876	331.43	4.2913	179.28	3.4431	318.14	4.2549	176.78	3.4928
356.23	4.3269	184.07	3.5373	358.71	4.3297	191.17	3.5338	354.63	4.3156	185.03	3.5423	337.68	4.2499	183.75	3.4875	331.74	4.2922	179.37	3.4429	318.46	4.2558	177.13	3.4918
356.54	4.3279	184.15	3.537	359.02	4.3306	191.52	3.5328	354.94	4.3166	185.47	3.5412	337.74	4.2499	184.1	3.4865	332.05	4.2932	179.72	3.4419	318.77	4.2567	177.22	3.4915
356.85	4.3289	184.59	3.536	359.34	4.3316	191.61	3.5326	355.25	4.3176	185.82	3.5402	337.74	4.2499	184.18	3.4863	332.36	4.2942	179.81	3.4416	319.08	4.2575	177.57	3.4905
357.16	4.3298	185.03	3.5347	359.65	4.3326	192.04	3.5315	355.57	4.3185	185.91	3.5401	337.8	4.2499	184.62	3.4852	332.68	4.2953	180.25	3.4405	319.39	4.2585	177.65	3.4902
357.48	4.3308	185.47	3.5336	359.96	4.3337	192.48	3.5304	355.88	4.3195	186.26	3.5391	338.05	4.2504	185.06	3.4841	332.99	4.2963	180.6	3.4394	319.7	4.2595	178	3.4891
357.79	4.3318	185.9	3.5325	360.27	4.3347	192.83	3.5294	356.19	4.3205	186.35	3.5389	338.36	4.2511	185.5	3.4829	333.3	4.2972	180.68	3.4392	320.02	4.2604	178.09	3.4889
358.1	4.3329	186.25	3.5315	360.58	4.3357	192.92	3.5293	356.5	4.3214	186.78	3.5376	338.68	4.2517	185.93	3.482	333.61	4.2982	181.03	3.4382	320.33	4.2614	178.44	3.4879
358.41	4.3337	186.34	3.5314	360.9	4.3366	193.27	3.5283	356.82	4.3224	187.22	3.5365	338.99	4.2524	186.28	3.481	333.92	4.2992	181.12	3.4379	320.64	4.2622	178.53	3.4876
358.72	4.3348	186.78	3.5302	361.21	4.3376	193.35	3.5281	357.13	4.3235	187.66	3.5354	339.3	4.2533	186.37	3.4808	334.24	4.3001	181.47	3.4369	320.95	4.2632	178.88	3.4866
359.04	4.3358	187.22	3.5291	361.52	4.3386	193.79	3.527	357.44	4.3245	188.01	3.5344	339.61	4.2541	186.81	3.4797	334.55	4.3013	181.56	3.4368	321.27	4.2641	178.97	3.4863
359.35	4.3368	187.57	3.5281	361.83	4.3397	194.14	3.526	357.75	4.3255	188.1	3.5343	339.93	4.2549	187.16	3.4787	334.86	4.3022	181.91	3.4358	321.58	4.2651	179.32	3.4852
359.66	4.3378	187.65	3.528	362.15	4.3405	194.23	3.5259	358.06	4.3265	188.45	3.5333	340.24	4.2558	187.25	3.4786	335.17	4.3032	182	3.4355	321.89	4.2662	179.4	3.485
359.97	4.3387	188	3.527	362.46	4.3416	194.58	3.5249	358.38	4.3274	188.53	3.5331	340.55	4.2567	187.6	3.4776	335.49	4.3042	182.35	3.4345	322.2	4.2671	179.84	3.4837
360.29	4.3397	188.09	3.5268	362.77	4.3426	194.67	3.5247	358.69	4.3284	188.97	3.5318	340.86	4.2575	187.68	3.4774	335.8	4.3051	182.43	3.4344	322.51	4.2682	180.19	3.4826
360.6	4.3407	188.53	3.5255	363.08	4.3436	195.1	3.5236	359	4.3294	189.41	3.5307	341.17	4.2585	188.12	3.4763	336.05	4.3061	182.78	3.4334	322.83	4.2691	180.28	3.4825
360.91	4.3418	188.96	3.5246	363.39	4.3445	195.54	3.5225	359.31	4.3303	189.85	3.5296	341.49	4.2593	188.56	3.4752	336.11	4.3063	182.87	3.4331	323.14	4.2701	180.63	3.4813
361.22	4.3428	189.31	3.5236	363.71	4.3455	195.89	3.5215	359.62	4.3313	190.2	3.5286	341.8	4.2603	189	3.4742	336.42	4.3072	183.22	3.4321	323.45	4.2711	180.72	3.4812
361.53	4.3437	189.4	3.5234	363.96	4.3465	195.98	3.5213	359.94	4.3323	190.28	3.5284	342.11	4.2612	189.43	3.4731	336.73	4.3082	183.31	3.4319	323.76	4.2721	181.07	3.48
361.85	4.3447	189.84	3.5223	364.02	4.3466	196.42	3.5202	360.25	4.3332	190.72	3.5273	342.42	4.2622	189.87	3.472	337.05	4.3092	183.75	3.4306	324.08	4.273	181.15	3.4799
362.16	4.3458	190.19	3.5213	364.33	4.3476	196.85	3.5191	360.5	4.3342	191.07	3.5263	342.74	4.263	190.31	3.4708	337.36	4.3103	184.18	3.4295	324.39	4.274	181.5	3.4787
362.47	4.3466	190.28	3.5212	364.64	4.3486	197.29	3.518	360.56	4.3344	191.16	3.5262	343.05	4.2641	190.75	3.4697	337.67	4.3113	184.53	3.4285	324.7	4.275	181.59	3.4786
362.78	4.3478	190.63	3.5202	364.95	4.3495	197.73	3.5168	360.87	4.3353	191.51	3.5252	343.36	4.2651	191.18	3.4687	337.98	4.3122	184.62	3.4282	325.01	4.2761	181.94	3.4774
363.09	4.3487	190.71	3.5201	365.27	4.3505	198.17	3.5157	361.19	4.3363	191.6	3.5249	343.67	4.2661	191.62	3.4676	338.3	4.3132	185.06	3.4271	325.32	4.2771	182.03	3.4773
363.41	4.3497	191.06	3.5191	365.58	4.3516	198.6	3.5147	361.5	4.3373	192.03	3.5238	343.98	4.2669	192.06	3.4665	338.61	4.3142	185.41	3.4261	325.64	4.278	182.38	3.4762
363.72	4.3507	191.15	3.5189	365.89	4.3526	199.04	3.5136	361.81	4.3382	192.47	3.5226	344.3	4.2679	192.5	3.4655	338.92	4.3152	185.5	3.426	325.89	4.279	182.47	3.476
364.03	4.3516	191.59	3.5178	366.2	4.3536	199.39	3.5126	362.12	4.3392	192.91	3.5215	344.61	4.2688	192.85	3.4645	339.23	4.3163	185.85	3.425	325.95	4.2792	182.82	3.475
364.34	4.3526	191.94	3.5168	366.52	4.3545	199.48	3.5125	362.43	4.3403	193.35	3.5204	344.92	4.2698	192.93	3.4644	339.54	4.3173	185.93	3.4248	326.26	4.2801	182.9	3.4747
364.66	4.3536	192.03	3.5167	366.83	4.3555	199.83	3.5115	362.75	4.3413	193.78	3.5192	345.23	4.2709	193.37	3.4632	339.86	4.3182	186.28	3.4237	326.57	4.2811	183.25	3.4737
364.97	4.3547	192.38	3.5157	367.14	4.3565	199.92	3.5113	363.06	4.3423	194.22	3.5181	345.55	4.2717	193.81	3.4623	340.17	4.3193	186.37	3.4235	326.89	4.2821	183.34	3.4734
365.28	4.3557	192.46	3.5155	367.45	4.3576	200.35	3.5102	363.37	4.3432	194.66	3.517	345.86	4.2729	194.16	3.4613	340.48	4.3203	186.81	3.4223	327.2	4.283	183.69	3.4724
365.59	4.3566	192.9	3.5144	367.76	4.3586	200.7	3.5092	363.68	4.3442	195.1	3.5159	346.17	4.2737	194.25	3.4611	340.79	4.3211	187.25	3.4211	327.51	4.2842	183.78	3.4721
365.9	4.3576	193.25	3.5134	368.08	4.3595	200.79	3.5091	363.99	4.3452	195.53	3.5147	346.48	4.2748	194.68	3.46	341.04	4.3221	187.68	3.42	327.82	4.2851	184.22	3.4708
366.22	4.3587	193.34	3.5133	368.39	4.3605	201.14	3.5081	364.31	4.3463	195.97	3.5136	346.79	4.2758	195.12	3.459	341.1	4.3223	188.03	3.419	328.13	4.2861	184.65	3.4695
366.53	4.3597	193.69	3.5123	368.7	4.3615	201.23	3.5079	364.62	4.3473	196.41	3.5125	347.11	4.2767	195.56	3.4579	341.42	4.3234	188.12	3.4189	328.45	4.2872	185.09	3.4684
366.84	4.3607	193.78	3.5121	369.01	4.3626	201.67	3.5068	364.93	4.3482	196.76	3.5115	347.42	4.2777	196	3.4568	341.73	4.3244	188.47	3.4177	328.76	4.2882	185.35	3.4674
367.15	4.3616	194.21	3.511	369.33	4.3636	202.1	3.5057	365.24	4.3492	196.84	3.5113	347.73	4.2787	196.43	3.4558	342.04	4.3253	188.56	3.4176	329.07	4.2892	185.53	3.4671
367.46	4.3626	194.65	3.5099	369.64	4.3645	202.54	3.5047	365.56	4.3502	197.28	3.5102	348.04	4.2796	196.87	3.4547	342.35	4.3263	188.91	3.4166	329.38	4.2901	185.88	3.4661
367.78	4.3636	195.09	3.5088	369.95	4.3655	202.98	3.5036	365.87	4.3511	197.63	3.5092	348.35	4.2806	197.31	3.4537	342.67	4.3273	189	3.4164	329.63	4.2911	185.97	3.4658
368.09	4.3647	195.53	3.5078	370.26	4.3665	203.33	3.5026	366.18	4.3521	197.72	3.5091	348.67	4.2816	197.75	3.4526	342.98	4.3284	189.43	3.4153	329.7	4.2913	186.41	3.4645
368.4	4.3657	195.88	3.5068	370.57	4.3676	203.42	3.5025	366.49	4.3532	198.16	3.5079	348.98	4.2827	198.18	3.4515	343.29	4.3294	189.78	3.4143	330.01	4.2922	186.84	3.4632
368.71	4.3666	195.96	3.5067	370.89	4.3686	203.85	3.5013	366.8	4.3542	198.59	3.5068	349.29	4.2835	198.62	3.4505	343.6	4.3305	189.87	3.4142	330.32	4.2934	187.28	3.4621
369.03	4.3676	196.31	3.5057	371.2	4.3696	204.29	3.5004	367.12	4.3552	199.03	3.5057	349.6	4.2845	199.06	3.4494	343.91	4.3315	190.22	3.4132	330.63	4.2943	187.63	3.4611
369.34	4.3687	196.4	3.5055	371.51	4.3705	204.64	3.4994	367.43	4.3562	199.38	3.5047	349.92	4.2855	199.5	3.4484	344.23	4.3324	190.31	3.4129	330.94	4.2953	187.72	3.4608
369.65	4.3697	196.84	3.5044	371.82	4.3716	204.73	3.4992	367.74	4.3573	199.47	3.5046	350.23	4.2866	199.85	3.4474	344.54	4.3334	190.75	3.4118	331.26	4.2963	188.16	3.4595
369.96	4.3707	197.28	3.5033	372.13	4.3726	205.17	3.4981	368.05	4.3583	199.91	3.5034	350.54	4.2876	199.93	3.4473	344.85	4.3344	191.1	3.4108	331.57	4.2974	188.59	3.4584
370.27	4.3716	197.71	3.5021	372.45	4.3736	205.6	3.497	368.37	4.3592	200.34	3.5023	350.85	4.2884	200.37	3.4461	345.16	4.3355	191.18	3.4106	331.88	4.2984	188.94	3.4573
370.59	4.3726	198.15	3.5012	372.76	4.3746	206.04	3.4958	368.68	4.3602	200.78	3.5012	351.16	4.2895	200.81	3.4452	345.48	4.3365	191.62	3.4095	332.19	4.2993	189.03	3.4571
370.9	4.3737	198.5	3.5002	373.07	4.3755	206.48	3.4949	368.99	4.3612	201.22	3.5	351.48	4.2905	201.25	3.444	345.79	4.3374	191.97	3.4085	332.51	4.3005	189.38	3.4561
371.21	4.3747	198.59	3.5	373.38	4.3765	206.92	3.4937	369.3	4.3621	201.66	3.4991	351.79	4.2914	201.68	3.4431	346.1	4.3384	192.06	3.4082	332.82	4.3014	189.47	3.4558
371.52	4.3757	199.03	3.4989	373.63	4.3775	207.35	3.4926	369.61	4.3633	202.01	3.4981	352.1	4.2926	202.03	3.4421	346.41	4.3395	192.5	3.4071	333.13	4.3024	189.91	3.4547
371.84	4.3767	199.46	3.4978	373.7	4.3776	207.79	3.4916	369.93	4.3642	202.09	3.4979	352.41	4.2934	202.12	3.4419	346.72	4.3405	192.93	3.406	333.44	4.3035	190.26	3.4536
372.15	4.3776	199.9	3.4967	374.01	4.3786	208.23	3.4905	370.24	4.3652	202.53	3.4968	352.73	4.2945	202.56	3.441	347.04	4.3415	193.37	3.405	333.76	4.3045	190.34	3.4534
372.46	4.3788	200.34	3.4957	374.32	4.3796	208.67	3.4894	370.55	4.3662	202.97	3.4957	353.04	4.2955	203	3.4398	347.35	4.3426	193.72	3.404	334.07	4.3055	190.69	3.4524
372.77	4.3797	200.69	3.4947	374.63	4.3807	209.1	3.4884	370.86	4.3673	203.41	3.4946	353.35	4.2964	203.43	3.4387	347.66	4.3436	193.81	3.4037	334.38	4.3064	190.78	3.4523
373.08	4.3807	200.78	3.4946	374.94	4.3817	209.54	3.4873	371.17	4.3683	203.84	3.4934	353.66	4.2974	203.87	3.4377	347.97	4.3447	194.16	3.4027	334.63	4.3074	191.13	3.4511
373.4	4.3817	201.13	3.4936	375.26	4.3826	209.98	3.4862	371.49	4.3692	204.28	3.4925	353.97	4.2984	204.31	3.4368	348.29	4.3457	194.25	3.4026	334.69	4.3076	191.22	3.451
373.71	4.3828	201.21	3.4934	375.57	4.3836	210.42	3.4852	371.8	4.3702	204.63	3.4915	354.29	4.2993	204.66	3.4358	348.6	4.3466	194.59	3.4016	335	4.3085	191.57	3.45
374.02	4.3838	201.65	3.4925	375.88	4.3846	210.85	3.4841	372.11	4.3712	204.72	3.4913	354.6	4.3003	204.75	3.4356	348.91	4.3476	194.68	3.4014	335.32	4.3097	191.66	3.4497
374.33	4.3847	202	3.4915	376.19	4.3857	211.29	3.4829	372.42	4.3723	205.16	3.4902	354.91	4.3014	205.18	3.4345	349.16	4.3486	195.12	3.4003	335.63	4.3106	192.01	3.4487
374.64	4.3859	202.09	3.4913	376.51	4.3867	211.73	3.482	372.74	4.3733	205.51	3.4892	355.22	4.3024	205.62	3.4335	349.22	4.3487	195.47	3.3993	335.94	4.3116	192.09	3.4486
374.96	4.3867	202.52	3.4902	376.82	4.3876	212.17	3.481	373.05	4.3742	205.59	3.4891	355.54	4.3034	206.06	3.4326	349.53	4.3497	195.56	3.3992	336.25	4.3127	192.44	3.4476
375.27	4.3878	202.87	3.4892	377.13	4.3888	212.52	3.48	373.36	4.3752	206.03	3.4879	355.85	4.3043	206.41	3.4316	349.85	4.3508	195.99	3.398	336.57	4.3137	192.53	3.4473
375.58	4.3888	202.96	3.4891	377.44	4.3896	212.6	3.4799	373.67	4.3762	206.47	3.487	356.16	4.3053	206.5	3.4315	350.16	4.3518	196.43	3.3969	336.88	4.3148	192.88	3.4463
375.89	4.3899	203.4	3.4879	377.75	4.3907	213.04	3.4787	373.98	4.3773	206.82	3.486	356.47	4.3063	206.93	3.4303	350.47	4.3528	196.87	3.3958	337.19	4.3158	192.97	3.4461
376.21	4.3909	203.84	3.487	378.07	4.3917	213.48	3.4778	374.3	4.3783	206.91	3.4858	356.78	4.3074	207.37	3.4294	350.78	4.3539	197.31	3.3947	337.5	4.3168	193.41	3.4448
376.52	4.3918	204.19	3.486	378.38	4.3926	213.83	3.4768	374.61	4.3792	207.34	3.4847	357.1	4.3084	207.81	3.4284	351.1	4.3549	197.74	3.3937	337.81	4.3179	193.84	3.4437
376.83	4.3928	204.27	3.4858	378.69	4.3936	213.91	3.4766	374.86	4.3802	207.78	3.4836	357.41	4.3093	208.16	3.4274	351.41	4.3558	198.09	3.3927	338.13	4.3189	194.19	3.4426
377.14	4.3938	204.71	3.4849	379	4.3946	214.35	3.4757	374.92	4.3802	208.22	3.4825	357.72	4.3103	208.25	3.4273	351.72	4.3568	198.18	3.3924	338.44	4.3198	194.28	3.4424
377.45	4.3949	205.06	3.4839	379.32	4.3957	214.7	3.4747	375.17	4.3812	208.66	3.4815	358.03	4.3113	208.68	3.4261	351.97	4.3578	198.62	3.3913	338.75	4.321	194.72	3.4413
377.77	4.3959	205.15	3.4837	379.63	4.3967	214.79	3.4745	375.23	4.3813	209.09	3.4804	358.35	4.3124	209.12	3.4252	352.03	4.3579	199.06	3.3903	339.06	4.3219	195.07	3.4403
378.08	4.3968	205.59	3.4826	379.94	4.3976	215.23	3.4736	375.54	4.3823	209.53	3.4792	358.66	4.3134	209.56	3.424	352.34	4.3589	199.41	3.3893	339.38	4.3229	195.16	3.4402
378.39	4.398	206.02	3.4816	380.25	4.3988	215.66	3.4726	375.86	4.3833	209.97	3.4781	358.97	4.3143	210	3.4231	352.66	4.3599	199.49	3.3892	339.69	4.324	195.51	3.439
378.7	4.3988	206.46	3.4805	380.56	4.3996	216.01	3.4716	376.17	4.3842	210.41	3.4771	359.28	4.3153	210.43	3.4221	352.97	4.361	199.84	3.3882	340	4.325	195.59	3.4389
379.01	4.3999	206.9	3.4795	380.88	4.4007	216.1	3.4715	376.48	4.3854	210.84	3.476	359.53	4.3163	210.78	3.4211	353.28	4.362	199.93	3.388	340.31	4.3261	195.94	3.4379
379.33	4.4009	207.34	3.4784	381.19	4.4017	216.54	3.4703	376.79	4.3863	211.28	3.475	359.59	4.3163	210.87	3.421	353.59	4.3631	200.37	3.3869	340.62	4.3271	196.03	3.4377
379.64	4.4018	207.77	3.4773	381.5	4.4026	216.98	3.4694	377.11	4.3873	211.72	3.4739	359.91	4.3174	211.31	3.42	353.9	4.3641	200.81	3.3859	340.94	4.3281	196.47	3.4365
379.95	4.4028	208.21	3.4763	381.81	4.4036	217.41	3.4682	377.42	4.3883	212.16	3.4729	360.22	4.3184	211.66	3.419	354.22	4.365	201.24	3.3848	341.25	4.329	196.91	3.4353
380.2	4.4038	208.65	3.4752	382.06	4.4046	217.85	3.4673	377.73	4.3894	212.59	3.4718	360.53	4.3193	211.74	3.4189	354.53	4.366	201.59	3.3838	341.5	4.33	197.34	3.4342
380.26	4.4039	209.09	3.4742	382.12	4.4047	218.29	3.4663	378.04	4.3904	213.03	3.4707	360.84	4.3203	212.18	3.4179	354.78	4.367	201.68	3.3837	341.56	4.3302	197.69	3.4332
380.58	4.4049	209.52	3.4731	382.44	4.4057	218.73	3.4653	378.35	4.3913	213.47	3.4697	361.16	4.3213	212.62	3.4168	354.84	4.3671	202.12	3.3825	341.87	4.3311	197.78	3.4331
380.89	4.4059	209.96	3.4721	382.75	4.4067	219.16	3.4642	378.67	4.3925	213.9	3.4686	361.47	4.3223	213.06	3.4158	355.15	4.3681	202.56	3.3816	342.12	4.3321	198.13	3.4321
381.2	4.4068	210.4	3.4712	383.06	4.4076	219.6	3.4632	378.98	4.3934	214.34	3.4676	361.78	4.3232	213.49	3.4147	355.47	4.3692	202.91	3.3804	342.19	4.3323	198.22	3.4318
381.51	4.4078	210.75	3.4702	383.37	4.4086	220.04	3.4623	379.29	4.3944	214.69	3.4666	362.09	4.3244	213.93	3.4137	355.78	4.3702	202.99	3.3804	342.5	4.3332	198.66	3.4306
381.76	4.4088	210.84	3.47	383.62	4.4096	220.48	3.4611	379.6	4.3954	214.78	3.4665	362.4	4.3253	214.37	3.4127	356.09	4.3712	203.43	3.3793	342.81	4.3342	199.09	3.4295
381.82	4.4089	211.27	3.4689	383.69	4.4096	220.91	3.4602	379.91	4.3965	215.22	3.4655	362.72	4.3263	214.81	3.4116	356.4	4.3723	203.78	3.3783	343.12	4.3352	199.44	3.4285
382.14	4.4099	211.71	3.4679	384	4.4107	221.35	3.4592	380.23	4.3975	215.65	3.4645	363.03	4.3273	215.24	3.4106	356.71	4.3733	203.87	3.3782	343.43	4.3363	199.53	3.4282
382.45	4.4109	212.15	3.467	384.31	4.4118	221.79	3.4582	380.54	4.3984	216.09	3.4632	363.34	4.3282	215.68	3.4095	357.03	4.3742	204.22	3.3772	343.75	4.3373	199.97	3.4271
382.76	4.4118	212.5	3.466	384.62	4.4128	222.23	3.4571	380.85	4.3994	216.53	3.4624	363.59	4.3292	216.12	3.4085	357.28	4.3752	204.31	3.3771	344.06	4.3384	200.32	3.4261
383.01	4.4128	212.59	3.4658	384.93	4.4138	222.66	3.4563	381.16	4.4004	216.97	3.4613	363.65	4.3294	216.56	3.4074	357.34	4.3754	204.74	3.3761	344.37	4.3394	200.41	3.426
383.07	4.413	213.02	3.4649	385.25	4.4147	223.1	3.4552	381.48	4.4015	217.32	3.4603	363.97	4.3303	216.99	3.4064	357.65	4.3763	205.09	3.3751	344.68	4.3403	200.76	3.425
383.38	4.4139	213.46	3.4637	385.56	4.4157	223.54	3.4542	381.79	4.4025	217.4	3.4603	364.28	4.3313	217.43	3.4055	357.9	4.3773	205.18	3.375	344.93	4.3413	200.84	3.4248
383.7	4.4151	213.9	3.4628	385.87	4.4168	223.98	3.4532	382.1	4.4034	217.84	3.4592	364.59	4.3323	217.78	3.4045	357.96	4.3773	205.62	3.3738	345	4.3415	201.28	3.4237
384.01	4.4159	214.34	3.4618	386.18	4.4177	224.41	3.4523	382.35	4.4044	218.28	3.4582	364.9	4.3334	217.87	3.4043	358.21	4.3783	206.06	3.3729	345.31	4.3424	201.63	3.4227
384.32	4.417	214.77	3.4607	386.5	4.4188	224.85	3.4511	382.41	4.4046	218.72	3.4573	365.21	4.3344	218.31	3.4032	358.28	4.3784	206.41	3.3719	345.62	4.3434	201.72	3.4226
384.63	4.418	215.21	3.4597	386.81	4.4198	225.29	3.4503	382.72	4.4055	219.07	3.4563	365.53	4.3353	218.74	3.4022	358.59	4.3794	206.49	3.3717	345.87	4.3444	202.07	3.4216
384.95	4.4189	215.65	3.4587	386.93	4.4201	225.73	3.4494	383.04	4.4065	219.15	3.4561	365.84	4.3363	219.18	3.4013	358.9	4.3805	206.93	3.3706	345.93	4.3445	202.16	3.4214
385.26	4.4201	216.08	3.4576	386.93	4.4198	226.16	3.4484	383.35	4.4075	219.59	3.4552	366.15	4.3374	219.62	3.4003	359.21	4.3815	207.37	3.3695	346.24	4.3455	202.59	3.4203
385.26	4.4198	216.52	3.4566	386.99	4.4198	226.6	3.4473	383.66	4.4085	220.03	3.4542	366.46	4.3384	219.97	3.3993	359.52	4.3826	207.81	3.3685	346.56	4.3466	202.94	3.4193
385.32	4.4198	216.96	3.4557	387.24	4.4198	227.04	3.4463	383.97	4.4096	220.38	3.4532	366.78	4.3394	220.06	3.3992	359.84	4.3836	208.24	3.3675	346.87	4.3476	203.03	3.419
385.57	4.4198	217.4	3.4547	387.54	4.4198	227.48	3.4453	384.28	4.4105	220.47	3.4531	367.09	4.3403	220.49	3.3982	360.15	4.3846	208.68	3.3664	347.18	4.3486	203.47	3.4179
385.87	4.4198	217.83	3.4536	387.83	4.4198	227.91	3.4444	384.6	4.4115	220.9	3.4521	367.4	4.3413	220.84	3.3972	360.46	4.3857	209.12	3.3653	347.49	4.3497	203.91	3.4168
386.16	4.4198	218.27	3.4526	388.12	4.4198	228.35	3.4434	384.91	4.4125	221.34	3.4511	367.71	4.3424	220.93	3.3971	360.77	4.3867	209.56	3.3643	347.81	4.3507	204.35	3.4156
386.46	4.4198	218.71	3.4516	388.41	4.4198	228.79	3.4424	385.22	4.4135	221.78	3.4502	368.02	4.3434	221.37	3.3961	361.09	4.3876	209.99	3.3632	348.12	4.3518	204.78	3.4147
386.74	4.4198	219.15	3.4507	388.69	4.4198	229.23	3.4415	385.53	4.4144	222.13	3.4492	368.34	4.3444	221.81	3.3951	361.4	4.3888	210.43	3.362	348.43	4.3528	205.13	3.4135
387.03	4.4198	219.58	3.4495	388.98	4.4198	229.66	3.4407	385.78	4.4154	222.22	3.449	368.65	4.3455	222.24	3.394	361.71	4.3897	210.87	3.3611	348.74	4.3537	205.22	3.4134
387.31	4.4198	220.02	3.4486	389.25	4.4198	230.01	3.4397	385.85	4.4156	222.65	3.4481	368.96	4.3465	222.68	3.393	362.02	4.3907	211.31	3.3601	349.05	4.3547	205.57	3.4124
387.59	4.4196	220.46	3.4476	389.53	4.4198	230.1	3.4397	386.16	4.4165	223.09	3.4471	369.27	4.3474	223.12	3.3921	362.33	4.3918	211.66	3.3591	349.3	4.3557	205.66	3.4122
387.87	4.4196	220.9	3.4466	389.8	4.4198	230.45	3.4387	386.47	4.4175	223.53	3.446	369.58	4.3484	223.56	3.3909	362.65	4.3928	211.74	3.359	349.37	4.3558	206.1	3.4111
388.14	4.4196	221.33	3.4457	390.07	4.4198	230.54	3.4387	386.78	4.4185	223.97	3.445	369.9	4.3494	223.99	3.39	362.96	4.3939	212.18	3.358	349.68	4.3568	206.53	3.4101
388.41	4.4198	221.77	3.4447	390.34	4.4198	230.98	3.4377	387.09	4.4196	224.4	3.444	370.21	4.3505	224.43	3.3888	363.27	4.3949	212.53	3.357	349.93	4.3578	206.97	3.4089
388.68	4.4198	222.21	3.4437	390.61	4.4199	231.41	3.4368	387.28	4.4201	224.84	3.4431	370.52	4.3515	224.87	3.3879	363.58	4.3959	212.62	3.3569	349.99	4.3578	207.41	3.4079
388.95	4.4198	222.65	3.4427	390.87	4.4198	231.85	3.4358	387.28	4.4198	225.28	3.4421	370.83	4.3524	225.31	3.3869	363.9	4.3968	213.06	3.3559	350.3	4.3589	207.76	3.4069
389.21	4.4196	223.08	3.4418	391.13	4.4198	232.29	3.4348	387.34	4.4198	225.72	3.441	371.15	4.3534	225.74	3.3859	364.14	4.3978	213.49	3.3548	350.62	4.36	207.85	3.4068
389.47	4.4198	223.52	3.4408	391.38	4.4198	232.73	3.4339	387.59	4.4198	226.15	3.44	371.46	4.3545	226.18	3.3848	364.21	4.398	213.93	3.3538	350.93	4.361	208.28	3.4056
389.73	4.4198	223.96	3.4398	391.64	4.4198	233.16	3.4329	387.89	4.4198	226.59	3.439	371.77	4.3555	226.62	3.3838	364.52	4.3989	214.37	3.3528	351.24	4.362	208.72	3.4045
389.98	4.4198	224.4	3.4389	391.89	4.4198	233.6	3.4319	388.18	4.4196	227.03	3.4381	372.08	4.3565	227.06	3.3829	364.83	4.4001	214.81	3.3517	351.55	4.3631	209.07	3.4035
390.24	4.4198	224.83	3.4379	392.14	4.4198	234.04	3.4311	388.47	4.4198	227.46	3.4371	372.39	4.3574	227.49	3.3817	365.14	4.401	215.24	3.3508	351.86	4.3641	209.16	3.4034
390.49	4.4198	225.27	3.4369	392.39	4.4198	234.48	3.4302	388.76	4.4198	227.9	3.4361	372.71	4.3584	227.93	3.3808	365.46	4.402	215.68	3.3496	352.18	4.365	209.51	3.4024
390.74	4.4196	225.71	3.436	392.64	4.4198	234.91	3.4292	389.04	4.4196	228.34	3.4352	373.02	4.3594	228.37	3.3798	365.77	4.4031	216.12	3.3487	352.49	4.366	209.6	3.4022
390.99	4.4198	226.06	3.435	392.88	4.4198	235.35	3.4282	389.33	4.4198	228.78	3.4342	373.33	4.3605	228.81	3.3788	366.08	4.4041	216.56	3.3477	352.8	4.3671	210.03	3.4011
391.23	4.4198	226.15	3.435	393.12	4.4198	235.79	3.4273	389.6	4.4198	229.21	3.4332	373.64	4.3615	229.24	3.3777	366.39	4.4051	216.91	3.3467	353.11	4.3681	210.47	3.4001
391.47	4.4198	226.58	3.434	393.36	4.4198	236.23	3.4263	389.88	4.4196	229.65	3.4321	373.96	4.3626	229.68	3.3767	366.7	4.4062	216.99	3.3466	353.43	4.3691	210.91	3.399
391.72	4.4196	227.02	3.4331	393.6	4.4198	236.66	3.4255	390.15	4.4198	230.09	3.4311	374.27	4.3636	230.12	3.3758	367.02	4.4072	217.43	3.3456	353.74	4.3702	211.26	3.398
391.95	4.4196	227.46	3.4319	393.83	4.4198	237.1	3.4245	390.42	4.4196	230.53	3.4302	374.58	4.3645	230.56	3.3746	367.33	4.4081	217.87	3.3445	354.05	4.3712	211.35	3.3979
392.19	4.4198	227.89	3.4311	394.06	4.4198	237.54	3.4235	390.69	4.4198	230.96	3.4294	374.89	4.3655	230.99	3.3737	367.58	4.4091	218.31	3.3435	354.36	4.3723	211.7	3.3969
392.43	4.4196	228.33	3.4302	394.29	4.4198	237.98	3.4226	390.96	4.4196	231.4	3.4284	375.2	4.3666	231.43	3.3727	367.64	4.4093	218.74	3.3425	354.68	4.3733	211.78	3.3968
392.66	4.4198	228.77	3.4292	394.52	4.4198	238.41	3.4218	391.22	4.4196	231.84	3.4274	375.52	4.3676	231.87	3.3717	367.95	4.4102	219.18	3.3416	354.99	4.3742	212.22	3.3958
392.89	4.4198	229.21	3.4282	394.75	4.4198	238.85	3.4208	391.48	4.4196	232.28	3.4264	375.83	4.3686	232.31	3.3706	368.27	4.4114	219.53	3.3406	355.3	4.3754	212.57	3.3948
393.12	4.4196	229.64	3.4273	394.97	4.4199	239.29	3.4198	391.74	4.4196	232.71	3.4255	376.14	4.3696	232.74	3.3696	368.58	4.4123	219.62	3.3404	355.61	4.3763	212.66	3.3947
393.34	4.4198	230.08	3.4263	395.2	4.4198	239.72	3.4189	391.99	4.4196	233.15	3.4245	376.45	4.3705	233.18	3.3687	368.89	4.4133	220.06	3.3395	355.92	4.3773	213.01	3.3937
393.57	4.4196	230.52	3.4253	395.42	4.4198	240.16	3.4179	392.24	4.4198	233.59	3.4235	376.77	4.3716	233.62	3.3675	369.2	4.4144	220.49	3.3383	356.24	4.3784	213.1	3.3937
393.79	4.4196	230.96	3.4245	395.64	4.4198	240.6	3.4171	392.49	4.4196	234.03	3.4226	377.08	4.3726	234.06	3.3666	369.51	4.4154	220.93	3.3375	356.55	4.3794	213.45	3.3927
394.01	4.4198	231.31	3.4235	395.85	4.4198	241.04	3.4161	392.74	4.4198	234.46	3.4216	377.39	4.3736	234.49	3.3654	369.83	4.4164	221.37	3.3364	356.86	4.3804	213.53	3.3924
394.23	4.4196	231.39	3.4234	396.07	4.4198	241.47	3.4152	392.99	4.4198	234.9	3.4206	377.7	4.3746	234.93	3.3646	370.14	4.4175	221.81	3.3354	357.17	4.3815	213.97	3.3914
394.45	4.4196	231.83	3.4224	396.28	4.4198	241.91	3.4143	393.23	4.4196	235.34	3.4197	378.01	4.3757	235.37	3.3635	370.45	4.4185	222.24	3.3343	357.49	4.3825	214.41	3.3903
394.66	4.4198	232.27	3.4216	396.49	4.4198	242.35	3.4134	393.47	4.4198	235.78	3.4185	378.33	4.3767	235.81	3.3625	370.76	4.4194	222.68	3.3333	357.8	4.3834	214.85	3.3892
394.88	4.4196	232.71	3.4206	396.7	4.4198	242.79	3.4124	393.71	4.4196	236.21	3.4177	378.64	4.3776	236.24	3.3616	370.95	4.4201	223.12	3.3324	358.11	4.3844	215.28	3.3882
395.09	4.4198	233.14	3.4197	396.91	4.4198	243.22	3.4116	393.95	4.4198	236.65	3.4168	378.95	4.3786	236.68	3.3606	370.95	4.4199	223.56	3.3314	358.36	4.3854	215.63	3.3872
395.3	4.4196	233.58	3.4187	397.12	4.4198	243.66	3.4106	394.18	4.4198	237.09	3.4158	379.26	4.3796	237.12	3.3596	371.01	4.4199	223.91	3.3304	358.42	4.3855	215.72	3.3871
395.51	4.4198	234.02	3.4177	397.32	4.4198	244.1	3.4097	394.41	4.4196	237.53	3.4148	379.58	4.3807	237.56	3.3587	371.26	4.4202	223.99	3.3303	358.73	4.3865	216.16	3.3861
395.72	4.4196	234.46	3.4168	397.52	4.4198	244.54	3.4089	394.64	4.4198	237.96	3.4139	379.89	4.3817	237.91	3.3577	371.57	4.4202	224.43	3.3293	359.05	4.3875	216.51	3.3851
395.92	4.4198	234.89	3.4158	397.72	4.4198	244.97	3.4079	394.87	4.4198	238.4	3.4129	380.2	4.3826	237.99	3.3575	371.87	4.4201	224.87	3.3283	359.36	4.3886	216.6	3.385
396.12	4.4196	235.33	3.4148	397.92	4.4198	245.41	3.4069	395.1	4.4198	238.84	3.4119	380.51	4.3836	238.43	3.3566	372.17	4.4201	225.31	3.3274	359.67	4.3896	217.03	3.3838
396.33	4.4198	235.77	3.4139	398.12	4.4198	245.85	3.4061	395.32	4.4196	239.28	3.411	380.82	4.3847	238.87	3.3556	372.47	4.4201	225.66	3.3264	359.98	4.3905	217.47	3.3829
396.53	4.4198	236.21	3.4131	398.32	4.4198	246.29	3.4051	395.55	4.4198	239.71	3.4101	381.14	4.3857	239.31	3.3545	372.77	4.4202	225.74	3.3262	360.3	4.3915	217.91	3.3817
396.72	4.4196	236.64	3.4121	398.51	4.4198	246.72	3.4043	395.77	4.4198	240.15	3.4092	381.45	4.3867	239.74	3.3535	373.06	4.4201	226.18	3.3253	360.55	4.3925	218.35	3.3808
396.92	4.4198	237.08	3.4111	398.7	4.4198	247.16	3.4034	395.99	4.4198	240.59	3.4082	381.76	4.3876	240.18	3.3525	373.35	4.4201	226.62	3.3243	360.61	4.3926	218.78	3.3796
397.12	4.4196	237.52	3.4101	398.89	4.4198	247.6	3.4026	396.2	4.4196	241.02	3.4072	382.07	4.3888	240.62	3.3516	373.64	4.4201	227.06	3.3233	360.92	4.3936	219.22	3.3787
397.31	4.4198	237.96	3.4092	399.08	4.4198	248.04	3.4016	396.42	4.4196	241.46	3.4063	382.39	4.3896	241.06	3.3504	373.93	4.4201	227.49	3.3223	361.23	4.3946	219.57	3.3777
397.5	4.4198	238.39	3.4084	399.27	4.4198	248.47	3.4006	396.63	4.4198	241.9	3.4053	382.7	4.3907	241.49	3.3496	374.21	4.4201	227.93	3.3214	361.54	4.3957	219.66	3.3775
397.69	4.4198	238.83	3.4074	399.46	4.4198	248.91	3.3998	396.84	4.4198	242.34	3.4043	383.01	4.3917	241.93	3.3485	374.49	4.4202	228.28	3.3204	361.86	4.3967	220.1	3.3764
397.88	4.4196	239.27	3.4064	399.64	4.4198	249.35	3.399	397.05	4.4196	242.77	3.4035	383.32	4.3926	242.37	3.3475	374.77	4.4202	228.37	3.3203	362.17	4.3976	220.54	3.3754
398.07	4.4198	239.71	3.4055	399.83	4.4198	249.79	3.398	397.26	4.4196	243.21	3.4024	383.63	4.3936	242.81	3.3466	375.05	4.4202	228.81	3.3193	362.48	4.3986	220.97	3.3745
398.26	4.4196	240.14	3.4045	400.01	4.4198	250.22	3.3971	397.47	4.4196	243.65	3.4016	383.95	4.3947	243.24	3.3456	375.33	4.4201	229.24	3.3183	362.73	4.3996	221.41	3.3733
398.44	4.4198	240.58	3.4037	400.19	4.4198	250.66	3.3963	397.67	4.4198	244.09	3.4006	384.26	4.3957	243.59	3.3446	375.6	4.4201	229.68	3.3173	362.79	4.3997	221.85	3.3724
398.62	4.4196	241.02	3.4027	400.37	4.4198	251.1	3.3953	397.87	4.4198	244.52	3.3998	384.57	4.3967	243.68	3.3445	375.87	4.4202	230.12	3.3164	363.11	4.4007	222.29	3.3712
398.81	4.4198	241.45	3.4019	400.54	4.4198	251.54	3.3945	398.07	4.4196	244.96	3.3989	384.88	4.3976	244.12	3.3435	376.14	4.4202	230.56	3.3152	363.42	4.4017	222.72	3.3703
398.99	4.4198	241.89	3.4009	400.72	4.4196	251.97	3.3935	398.27	4.4198	245.4	3.3979	385.2	4.3986	244.56	3.3425	376.41	4.4202	230.99	3.3143	363.73	4.4026	223.16	3.3691
399.17	4.4198	242.33	3.4	400.9	4.4198	252.41	3.3927	398.47	4.4198	245.84	3.3969	385.51	4.3997	244.99	3.3416	376.67	4.4201	231.43	3.3133	363.98	4.4036	223.6	3.3682
399.34	4.4198	242.77	3.399	401.07	4.4198	252.85	3.3917	398.67	4.4196	246.27	3.3961	385.82	4.4007	245.43	3.3404	376.94	4.4202	231.87	3.3123	364.04	4.4036	224.04	3.3671
399.52	4.4196	243.2	3.398	401.24	4.4198	253.29	3.3909	398.86	4.4196	246.71	3.3951	386.13	4.4017	245.87	3.3395	377.2	4.4202	232.31	3.3114	364.29	4.4046	224.47	3.3661
399.7	4.4198	243.64	3.3972	401.41	4.4198	253.72	3.39	399.05	4.4198	247.15	3.3942	386.44	4.4026	246.31	3.3385	377.46	4.4201	232.74	3.3104	364.35	4.4047	224.91	3.365
399.87	4.4198	244.08	3.3963	401.58	4.4198	254.16	3.3892	399.24	4.4198	247.59	3.3932	386.76	4.4036	246.74	3.3375	377.71	4.4202	233.18	3.3094	364.67	4.4057	225.35	3.364
400.04	4.4198	244.52	3.3953	401.75	4.4196	254.6	3.3884	399.43	4.4198	248.02	3.3924	387.07	4.4047	247.18	3.3366	377.97	4.4202	233.62	3.3083	364.98	4.4067	225.79	3.363
400.21	4.4198	244.95	3.3943	401.91	4.4198	255.04	3.3874	399.62	4.4198	248.46	3.3914	387.38	4.4055	247.62	3.3354	378.22	4.4202	234.06	3.3073	365.29	4.4076	226.22	3.362
400.38	4.4198	245.39	3.3935	402.08	4.4198	255.47	3.3864	399.81	4.4198	248.9	3.3905	387.63	4.4065	248.06	3.3345	378.48	4.4202	234.49	3.3064	365.6	4.4088	226.66	3.3609
400.55	4.4198	245.83	3.3926	402.24	4.4198	255.91	3.3856	399.99	4.4198	249.34	3.3897	387.69	4.4067	248.49	3.3335	378.73	4.4201	234.93	3.3054	365.92	4.4096	227.1	3.36
400.72	4.4198	246.27	3.3916	402.41	4.4198	256.35	3.3848	400.18	4.4196	249.77	3.3887	388.01	4.4076	248.93	3.3325	378.97	4.4202	235.37	3.3043	366.23	4.4107	227.54	3.3588
400.88	4.4198	246.7	3.3908	402.57	4.4198	256.79	3.3838	400.36	4.4196	250.21	3.3877	388.32	4.4086	249.28	3.3315	379.22	4.4202	235.81	3.3035	366.54	4.4117	227.97	3.3579
401.05	4.4198	247.14	3.3898	402.73	4.4198	257.22	3.383	400.54	4.4198	250.65	3.3869	388.63	4.4096	249.37	3.3315	379.47	4.4202	236.16	3.3025	366.85	4.4126	228.41	3.3569
401.21	4.4198	247.58	3.3888	402.89	4.4198	257.66	3.3822	400.72	4.4198	251.09	3.3859	388.94	4.4105	249.81	3.3306	379.71	4.4202	236.24	3.3023	367.16	4.4138	228.85	3.3558
401.37	4.4196	248.02	3.3879	403.04	4.4198	258.1	3.3813	400.89	4.4198	251.52	3.385	389.25	4.4117	250.16	3.3296	379.95	4.4201	236.68	3.3014	367.48	4.4147	229.29	3.3548
401.54	4.4198	248.45	3.3871	403.2	4.4198	258.54	3.3804	401.07	4.4196	251.96	3.3842	389.57	4.4126	250.24	3.3294	380.19	4.4201	237.12	3.3004	367.79	4.4157	229.72	3.3538
401.7	4.4198	248.89	3.3861	403.36	4.4198	258.97	3.3796	401.24	4.4198	252.4	3.3832	389.88	4.4136	250.68	3.3285	380.43	4.4202	237.56	3.2994	368.1	4.4167	230.16	3.3528
401.85	4.4198	249.33	3.3851	403.51	4.4198	259.41	3.3787	401.42	4.4198	252.84	3.3824	390.19	4.4146	251.12	3.3275	380.66	4.4202	237.99	3.2985	368.41	4.4177	230.6	3.3517
402.01	4.4198	249.77	3.3843	403.66	4.4198	259.85	3.3779	401.59	4.4196	253.27	3.3814	390.5	4.4156	251.56	3.3264	380.9	4.4201	238.43	3.2973	368.73	4.4186	231.04	3.3508
402.17	4.4196	250.2	3.3834	403.82	4.4198	260.29	3.3769	401.76	4.4198	253.71	3.3804	390.82	4.4165	251.99	3.3254	381.13	4.4201	238.87	3.2964	369.04	4.4196	231.47	3.3498
402.32	4.4198	250.64	3.3824	403.97	4.4198	260.72	3.3761	401.93	4.4196	254.15	3.3796	391.13	4.4177	252.43	3.3244	381.36	4.4202	239.31	3.2954	369.16	4.4201	231.82	3.3488
402.48	4.4196	251.08	3.3816	404.12	4.4198	261.16	3.3753	402.1	4.4198	254.59	3.3787	391.44	4.4186	252.87	3.3233	381.59	4.4202	239.74	3.2944	369.16	4.4201	231.91	3.3487
402.63	4.4198	251.52	3.3806	404.26	4.4198	261.6	3.3743	402.26	4.4198	255.02	3.3777	391.75	4.4196	253.31	3.3223	381.82	4.4202	240.18	3.2935	369.22	4.4201	232.35	3.3477
402.78	4.4196	251.95	3.3796	404.41	4.4198	262.04	3.3735	402.43	4.4196	255.46	3.3769	391.94	4.4201	253.74	3.3214	382.05	4.4202	240.62	3.2923	369.47	4.4207	232.79	3.3467
402.93	4.4198	252.39	3.3788	404.56	4.4198	262.47	3.3727	402.59	4.4198	255.9	3.3761	391.94	4.4199	254.18	3.3204	382.27	4.4201	241.06	3.2914	369.78	4.4207	233.22	3.3456
403.08	4.4198	252.83	3.3779	404.7	4.4198	262.91	3.3717	402.76	4.4198	256.34	3.3751	392	4.4199	254.62	3.3194	382.49	4.4202	241.49	3.2904	370.08	4.4207	233.66	3.3446
403.23	4.4198	253.26	3.3771	404.85	4.4198	263.35	3.3709	402.92	4.4198	256.77	3.3742	392.25	4.4199	255.06	3.3183	382.72	4.4202	241.93	3.2894	370.38	4.4207	234.1	3.3437
403.38	4.4198	253.7	3.3761	404.99	4.4198	263.79	3.3701	403.08	4.4198	257.21	3.3733	392.55	4.4199	255.49	3.3173	382.94	4.4201	242.37	3.2885	370.68	4.4207	234.54	3.3425
403.52	4.4198	254.14	3.3751	405.13	4.4198	264.22	3.3693	403.24	4.4198	257.65	3.3724	392.85	4.4199	255.93	3.3164	383.15	4.4202	242.81	3.2875	370.97	4.4207	234.97	3.3416
403.67	4.4198	254.58	3.3743	405.27	4.4198	264.66	3.3683	403.4	4.4198	258.08	3.3716	393.14	4.4199	256.28	3.3154	383.37	4.4202	243.24	3.2864	371.25	4.4207	235.41	3.3406
403.81	4.4198	255.01	3.3733	405.41	4.4198	265.1	3.3675	403.55	4.4198	258.52	3.3706	393.43	4.4199	256.37	3.3152	383.59	4.4201	243.68	3.2854	371.54	4.4207	235.85	3.3396
403.96	4.4198	255.45	3.3725	405.55	4.4198	265.54	3.3666	403.71	4.4198	258.96	3.3698	393.72	4.4199	256.81	3.3143	383.8	4.4201	244.12	3.2844	371.82	4.4207	236.29	3.3386
404.1	4.4198	255.89	3.3716	405.688	4.4198	265.97	3.3658	403.86	4.4198	259.4	3.3688	394	4.4199	257.24	3.3132	384.01	4.4201	244.56	3.2835	372.1	4.4206	236.72	3.3377
404.24	4.4198	256.33	3.3706	405.825	4.4198	266.41	3.365	404.02	4.4198	259.83	3.3679	394.28	4.4199	257.68	3.3122	384.22	4.4201	244.99	3.2825	372.38	4.4207	237.07	3.3367
404.38	4.4198	256.76	3.3696	405.961	4.4198	266.85	3.364	404.17	4.4198	260.27	3.3671	394.56	4.4201	258.12	3.3112	384.43	4.4202	245.43	3.2815	372.65	4.4207	237.16	3.3366
404.52	4.4198	257.2	3.3688	406.096	4.4198	267.29	3.3632	404.32	4.4198	260.71	3.3661	394.84	4.4199	258.56	3.3101	384.64	4.4202	245.87	3.2804	372.92	4.4207	237.6	3.3356
404.659	4.4198	257.64	3.3679	406.23	4.4198	267.72	3.3624	404.47	4.4198	261.15	3.3653	395.11	4.4199	258.99	3.3091	384.85	4.4202	246.3	3.2794	373.19	4.4207	238.04	3.3346
404.797	4.4198	258.08	3.3669	406.363	4.4198	268.16	3.3614	404.62	4.4196	261.58	3.3643	395.38	4.4199	259.43	3.308	385.05	4.4201	246.74	3.2785	373.46	4.4207	238.39	3.3336
404.933	4.4198	258.51	3.3661	406.495	4.4198	268.6	3.3606	404.76	4.4198	262.02	3.3635	395.64	4.4199	259.87	3.307	385.26	4.4201	247.18	3.2775	373.72	4.4207	238.47	3.3335
405.069	4.4196	258.95	3.3651	406.626	4.4198	269.04	3.3598	404.91	4.4198	262.46	3.3625	395.91	4.4199	260.31	3.3061	385.46	4.4202	247.62	3.2765	373.98	4.4207	238.91	3.3325
405.204	4.4198	259.39	3.3643	406.756	4.4198	269.47	3.3588	405.05	4.4198	262.9	3.3617	396.17	4.4199	260.74	3.3049	385.66	4.4202	248.05	3.2755	374.24	4.4207	239.35	3.3315
405.337	4.4198	259.83	3.3633	406.885	4.4198	269.91	3.358	405.2	4.4198	263.33	3.3608	396.43	4.4199	261.18	3.304	385.86	4.4202	248.49	3.2744	374.49	4.4207	239.79	3.3304
405.47	4.4198	260.26	3.3624	407.013	4.4198	270.35	3.357	405.34	4.4198	263.77	3.3598	396.68	4.4199	261.62	3.3028	386.06	4.4202	248.93	3.2735	374.75	4.4206	240.23	3.3294
405.602	4.4198	260.7	3.3616	407.14	4.4198	270.78	3.3562	405.48	4.4198	264.21	3.359	396.94	4.4199	262.06	3.3019	386.26	4.4202	249.37	3.2725	375	4.4207	240.66	3.3285
405.733	4.4196	261.14	3.3606	407.267	4.4198	271.22	3.3554	405.63	4.4196	264.65	3.3582	397.19	4.4199	262.49	3.3009	386.46	4.4202	249.8	3.2715	375.24	4.4206	241.1	3.3275
405.863	4.4198	261.58	3.3598	407.392	4.4198	271.66	3.3545	405.77	4.4198	265.08	3.3572	397.43	4.4199	262.84	3.2999	386.65	4.4202	250.24	3.2705	375.49	4.4207	241.54	3.3265
405.992	4.4198	262.01	3.3588	407.517	4.4198	272.1	3.3537	405.904	4.4198	265.52	3.3562	397.68	4.4201	262.93	3.2998	386.84	4.4201	250.68	3.2694	375.73	4.4207	241.98	3.3254
406.12	4.4198	262.45	3.3579	407.641	4.4198	272.53	3.3528	406.043	4.4196	265.96	3.3554	397.92	4.4199	263.37	3.2986	387.04	4.4201	251.12	3.2684	375.98	4.4206	242.41	3.3244
406.248	4.4196	262.89	3.357	407.764	4.4198	272.97	3.3519	406.18	4.4198	266.4	3.3545	398.16	4.4199	263.81	3.2977	387.23	4.4202	251.55	3.2673	376.22	4.4207	242.85	3.3233
406.374	4.4198	263.32	3.3561	407.886	4.4198	273.41	3.3511	406.316	4.4196	266.83	3.3535	398.4	4.4199	264.24	3.2965	387.42	4.4201	251.99	3.2664	376.45	4.4206	243.29	3.3223
406.5	4.4196	263.76	3.3553	408.007	4.4198	273.85	3.3501	406.452	4.4198	267.27	3.3527	398.64	4.4199	264.68	3.2956	387.6	4.4202	252.43	3.2654	376.69	4.4206	243.73	3.3214
406.625	4.4198	264.2	3.3543	408.127	4.4198	274.28	3.3493	406.586	4.4198	267.71	3.3517	398.87	4.4199	265.03	3.2946	387.79	4.4201	252.87	3.2643	376.92	4.4207	244.16	3.3204
406.749	4.4196	264.64	3.3533	408.247	4.4198	274.72	3.3483	406.719	4.4198	268.15	3.3509	399.11	4.4199	265.12	3.2944	387.98	4.4202	253.3	3.2633	377.15	4.4207	244.6	3.3193
406.872	4.4198	265.07	3.3525	408.365	4.4198	275.16	3.3475	406.852	4.4198	268.58	3.3499	399.34	4.4199	265.56	3.2935	388.16	4.4201	253.74	3.2623	377.38	4.4207	245.04	3.3183
406.994	4.4196	265.51	3.3516	408.483	4.4198	275.6	3.3467	406.983	4.4198	269.02	3.349	399.56	4.4199	265.99	3.2923	388.35	4.4202	254.18	3.2612	377.61	4.4207	245.48	3.3173
407.116	4.4196	265.95	3.3508	408.6	4.4198	276.03	3.3457	407.114	4.4198	269.46	3.348	399.79	4.4199	266.43	3.2914	388.53	4.4201	254.62	3.2602	377.83	4.4207	245.91	3.3162
407.236	4.4196	266.39	3.3498	408.716	4.4198	276.47	3.3449	407.243	4.4196	269.9	3.3472	400.01	4.4201	266.87	3.2902	388.71	4.4202	255.05	3.2593	378.05	4.4207	246.35	3.3152
407.356	4.4198	266.82	3.3488	408.832	4.4198	276.91	3.344	407.372	4.4198	270.33	3.3462	400.23	4.4199	267.31	3.2891	388.89	4.4201	255.49	3.2583	378.27	4.4207	246.79	3.3141
407.475	4.4198	267.26	3.348	408.946	4.4198	277.35	3.3432	407.5	4.4198	270.77	3.3453	400.45	4.4199	267.74	3.2881	389.07	4.4202	255.93	3.2572	378.49	4.4206	247.23	3.3132
407.594	4.4196	267.7	3.347	409.06	4.4198	277.78	3.3422	407.626	4.4198	271.21	3.3443	400.67	4.4199	268.18	3.287	389.25	4.4201	256.37	3.2562	378.71	4.4207	247.66	3.3122
407.711	4.4198	268.14	3.3461	409.173	4.4198	278.22	3.3414	407.752	4.4196	271.65	3.3435	400.89	4.4199	268.62	3.2859	389.42	4.4202	256.8	3.2552	378.93	4.4207	248.01	3.3112
407.828	4.4198	268.57	3.3453	409.285	4.4198	278.66	3.3404	407.877	4.4198	272.08	3.3425	401.1	4.4201	269.06	3.2849	389.6	4.4202	257.15	3.2542	379.14	4.4206	248.1	3.3111
407.944	4.4196	269.01	3.3443	409.397	4.4198	279.1	3.3396	408.001	4.4196	272.52	3.3416	401.31	4.4199	269.49	3.2838	389.77	4.4201	257.24	3.2541	379.35	4.4207	248.54	3.3101
408.059	4.4198	269.45	3.3433	409.507	4.4198	279.53	3.3386	408.125	4.4196	272.96	3.3406	401.52	4.4199	269.93	3.2828	389.95	4.4202	257.68	3.2531	379.56	4.4207	248.98	3.3091
408.173	4.4198	269.89	3.3425	409.618	4.4198	279.97	3.3377	408.247	4.4196	273.39	3.3396	401.73	4.4199	270.28	3.2818	390.12	4.4202	258.12	3.252	379.77	4.4207	249.33	3.3081
408.287	4.4198	270.32	3.3416	409.727	4.4198	280.41	3.3369	408.369	4.4198	273.83	3.3386	401.93	4.4199	270.37	3.2817	390.29	4.4202	258.55	3.251	379.97	4.4207	249.41	3.308
408.4	4.4196	270.76	3.3406	409.835	4.4198	280.85	3.3359	408.489	4.4198	274.27	3.3377	402.14	4.4199	270.72	3.2807	390.46	4.4202	258.99	3.2499	380.18	4.4207	249.85	3.307
408.512	4.4198	271.2	3.3398	409.943	4.4198	281.28	3.3351	408.609	4.4198	274.71	3.3369	402.34	4.4199	270.81	3.2806	390.63	4.4202	259.43	3.2489	380.38	4.4207	250.29	3.3061
408.624	4.4198	271.64	3.3388	410.05	4.4198	281.72	3.3341	408.728	4.4198	275.14	3.3359	402.54	4.4199	271.24	3.2794	390.79	4.4201	259.87	3.2478	380.58	4.4207	250.64	3.3051
408.735	4.4196	272.07	3.3378	410.156	4.4198	282.16	3.3332	408.847	4.4198	275.58	3.3349	402.74	4.4199	271.68	3.2783	390.96	4.4202	260.3	3.2468	380.78	4.4207	250.73	3.3049
408.845	4.4198	272.51	3.3369	410.262	4.4198	282.6	3.3324	408.964	4.4196	276.02	3.334	402.94	4.4199	272.12	3.2773	391.13	4.4202	260.74	3.2457	380.98	4.4207	251.16	3.304
408.954	4.4198	272.95	3.3359	410.367	4.4198	283.03	3.3314	409.081	4.4198	276.46	3.333	403.13	4.4199	272.56	3.2762	391.29	4.4201	261.18	3.2447	381.17	4.4207	251.6	3.3028
409.063	4.4198	273.39	3.3351	410.471	4.4198	283.47	3.3306	409.197	4.4198	276.89	3.332	403.32	4.4199	272.91	3.2752	391.45	4.4202	261.62	3.2436	381.36	4.4207	252.04	3.3019
409.171	4.4198	273.82	3.3341	410.575	4.4198	283.91	3.3296	409.312	4.4198	277.33	3.3311	403.52	4.4199	272.99	3.2751	391.62	4.4201	262.05	3.2426	381.56	4.4207	252.39	3.3009
409.278	4.4198	274.26	3.3332	410.678	4.4198	284.35	3.3286	409.427	4.4198	277.77	3.3301	403.71	4.4201	273.34	3.2741	391.78	4.4201	262.49	3.2415	381.75	4.4207	252.48	3.3007
409.385	4.4196	274.7	3.3324	410.78	4.4198	284.78	3.3277	409.54	4.4198	278.21	3.3291	403.89	4.4199	273.43	3.2739	391.94	4.4201	262.93	3.2405	381.94	4.4207	252.91	3.2998
409.491	4.4196	275.13	3.3314	410.881	4.4196	285.22	3.3267	409.653	4.4198	278.64	3.3282	404.08	4.4199	273.87	3.2728	392.1	4.4202	263.37	3.2396	382.12	4.4207	253.35	3.2986
409.596	4.4196	275.57	3.3304	410.982	4.4198	285.66	3.3259	409.765	4.4198	279.08	3.3272	404.26	4.4199	274.31	3.2718	392.26	4.4201	263.72	3.2386	382.31	4.4207	253.79	3.2977
409.701	4.4196	276.01	3.3294	411.082	4.4198	286.1	3.3249	409.877	4.4198	279.52	3.3262	404.45	4.4199	274.74	3.2707	392.42	4.4201	263.8	3.2384	382.49	4.4207	254.14	3.2967
409.805	4.4198	276.45	3.3286	411.181	4.4198	286.53	3.3241	409.988	4.4198	279.96	3.3253	404.63	4.4199	275.09	3.2697	392.57	4.4202	264.24	3.2373	382.68	4.4207	254.23	3.2965
409.908	4.4196	276.88	3.3277	411.28	4.4198	286.97	3.3232	410.098	4.4198	280.39	3.3243	404.81	4.4199	275.18	3.2694	392.73	4.4201	264.68	3.2363	382.86	4.4207	254.66	3.2956
410.01	4.4196	277.32	3.3267	411.378	4.4198	287.41	3.3222	410.207	4.4198	280.83	3.3233	404.99	4.4199	275.62	3.2684	392.88	4.4201	265.12	3.2352	383.04	4.4207	255.01	3.2946
410.113	4.4196	277.76	3.3257	411.476	4.4198	287.85	3.3212	410.315	4.4198	281.27	3.3223	405.17	4.4199	276.06	3.2673	393.04	4.4202	265.47	3.2342	383.22	4.4207	255.1	3.2944
410.214	4.4196	278.2	3.3248	411.573	4.4198	288.28	3.3203	410.423	4.4198	281.71	3.3212	405.34	4.4199	276.49	3.2662	393.19	4.4201	265.55	3.2342	383.39	4.4207	255.54	3.2935
410.314	4.4196	278.63	3.3238	411.67	4.4198	288.72	3.3193	410.53	4.4198	282.14	3.3204	405.52	4.4199	276.84	3.2652	393.34	4.4202	265.99	3.2331	383.57	4.4207	255.89	3.2925
410.415	4.4198	279.07	3.3228	411.765	4.4198	289.16	3.3183	410.636	4.4198	282.58	3.3194	405.69	4.4199	276.93	3.2649	393.49	4.4202	266.34	3.2321	383.74	4.4207	255.98	3.2923
410.514	4.4198	279.51	3.3219	411.86	4.4198	289.6	3.3175	410.741	4.4198	283.02	3.3183	405.86	4.4199	277.37	3.2639	393.64	4.4202	266.43	3.232	383.92	4.4207	256.42	3.2912
410.613	4.4196	279.95	3.3209	411.955	4.4198	290.03	3.3165	410.846	4.4198	283.46	3.3173	406.03	4.4201	277.81	3.2626	393.79	4.4201	266.87	3.231	384.09	4.4207	256.85	3.2902
410.711	4.4196	280.38	3.3199	412.049	4.4198	290.47	3.3156	410.95	4.4198	283.89	3.3164	406.2	4.4199	278.24	3.2615	393.94	4.4202	267.22	3.23	384.26	4.4207	257.29	3.2891
410.809	4.4198	280.82	3.319	412.142	4.4198	290.91	3.3146	411.054	4.4198	284.33	3.3152	406.37	4.4199	278.68	3.2604	394.09	4.4202	267.3	3.2299	384.42	4.4207	257.73	3.2881
410.906	4.4198	281.26	3.318	412.235	4.4198	291.35	3.3136	411.157	4.4198	284.77	3.3143	406.53	4.4199	279.03	3.2594	394.23	4.4202	267.74	3.2289	384.59	4.4207	258.17	3.287
411.002	4.4196	281.7	3.317	412.327	4.4198	291.78	3.3127	411.259	4.4198	285.21	3.3133	406.7	4.4199	279.12	3.2593	394.38	4.4202	268.09	3.2279	384.76	4.4206	258.52	3.286
411.098	4.4198	282.13	3.3161	412.418	4.4198	292.22	3.3117	411.361	4.4198	285.64	3.3123	406.86	4.4199	279.47	3.2583	394.52	4.4201	268.18	3.2276	384.92	4.4207	258.6	3.2859
411.193	4.4196	282.57	3.3151	412.509	4.4198	292.66	3.3107	411.462	4.4198	286.08	3.3114	407.02	4.4199	279.56	3.2581	394.67	4.4202	268.62	3.2267	385.08	4.4207	259.04	3.2849
411.288	4.4196	283.01	3.3141	412.6	4.4198	293.1	3.3098	411.562	4.4198	286.52	3.3102	407.18	4.4201	279.99	3.257	394.81	4.4202	269.05	3.2255	385.25	4.4207	259.39	3.2839
411.382	4.4198	283.45	3.3132	412.69	4.4198	293.53	3.3088	411.661	4.4198	286.96	3.3093	407.34	4.4201	280.34	3.256	394.95	4.4202	269.49	3.2246	385.41	4.4207	259.48	3.2838
411.476	4.4196	283.88	3.3122	412.779	4.4198	293.97	3.3078	411.76	4.4198	287.39	3.3083	407.5	4.4201	280.43	3.2557	395.09	4.4202	269.84	3.2236	385.57	4.4206	259.83	3.2828
411.569	4.4198	284.32	3.3112	412.868	4.4198	294.41	3.3069	411.859	4.4198	287.83	3.3073	407.65	4.4199	280.87	3.2546	395.23	4.4201	269.93	3.2234	385.72	4.4207	259.92	3.2826
411.661	4.4198	284.76	3.3102	412.956	4.4198	294.85	3.3059	411.956	4.4198	288.27	3.3062	407.81	4.4199	281.22	3.2536	395.37	4.4201	270.37	3.2223	385.88	4.4207	260.35	3.2815
411.753	4.4196	285.2	3.3093	413.043	4.4198	295.28	3.3049	412.053	4.4198	288.71	3.3052	407.96	4.4201	281.31	3.2534	395.513	4.4201	270.8	3.2212	386.04	4.4207	260.79	3.2806
411.844	4.4198	285.63	3.3081	413.13	4.4198	295.72	3.304	412.15	4.4198	289.14	3.3041	408.11	4.4199	281.74	3.2523	395.652	4.4202	271.24	3.2202	386.19	4.4207	261.14	3.2796
411.935	4.4198	286.07	3.3072	413.217	4.4198	296.16	3.303	412.245	4.4198	289.58	3.3031	408.27	4.4199	282.09	3.2513	395.789	4.4201	271.59	3.2192	386.34	4.4207	261.23	3.2794
412.025	4.4196	286.51	3.3062	413.303	4.4198	296.6	3.302	412.341	4.4198	290.02	3.302	408.42	4.4199	282.18	3.251	395.926	4.4201	271.68	3.2191	386.49	4.4207	261.67	3.2785
412.115	4.4198	286.95	3.3052	413.388	4.4198	297.03	3.301	412.435	4.4198	290.45	3.301	408.56	4.4199	282.62	3.2499	396.062	4.4202	272.03	3.2181	386.64	4.4207	262.02	3.2775
412.204	4.4198	287.38	3.3043	413.473	4.4198	297.47	3.3001	412.529	4.4198	290.89	3.3001	408.71	4.4199	282.97	3.2489	396.197	4.4201	272.12	3.2179	386.79	4.4207	262.1	3.2772
412.293	4.4198	287.82	3.3033	413.558	4.4198	297.82	3.2991	412.623	4.4198	291.24	3.2991	408.86	4.4199	283.06	3.2488	396.331	4.4202	272.55	3.2168	386.94	4.4207	262.54	3.2762
412.381	4.4198	288.26	3.3022	413.641	4.4198	297.91	3.2989	412.716	4.4198	291.33	3.2989	409	4.4199	283.41	3.2478	396.464	4.4201	272.99	3.2157	387.09	4.4206	262.89	3.2752
412.468	4.4198	288.69	3.3012	413.725	4.4198	298.35	3.298	412.808	4.4198	291.77	3.298	409.15	4.4199	283.49	3.2475	396.597	4.4202	273.43	3.2145	387.24	4.4206	262.98	3.2751
412.555	4.4198	289.13	3.3002	413.808	4.4198	298.78	3.297	412.9	4.4198	292.12	3.297	409.29	4.4201	283.84	3.2465	396.728	4.4201	273.87	3.2136	387.38	4.4206	263.33	3.2741
412.642	4.4196	289.57	3.2991	413.89	4.4198	299.22	3.296	412.991	4.4198	292.2	3.2969	409.43	4.4199	283.93	3.2463	396.86	4.4201	274.22	3.2126	387.52	4.4207	263.42	3.2739
412.728	4.4198	290.01	3.2981	413.972	4.4198	299.66	3.2951	413.082	4.4198	292.64	3.2959	409.57	4.4199	284.37	3.2452	396.99	4.4201	274.3	3.2125	387.67	4.4207	263.85	3.2728
412.813	4.4196	290.44	3.2972	414.053	4.4198	300.1	3.2939	413.171	4.4196	292.99	3.2949	409.71	4.4199	284.72	3.2441	397.12	4.4201	274.65	3.2115	387.81	4.4207	264.2	3.2718
412.898	4.4196	290.79	3.2962	414.134	4.4198	300.53	3.293	413.261	4.4198	293.08	3.2948	409.853	4.4199	284.81	3.2439	397.248	4.4201	274.74	3.2113	387.95	4.4206	264.29	3.2717
412.983	4.4198	290.88	3.296	414.214	4.4199	300.97	3.292	413.35	4.4198	293.52	3.2936	409.991	4.4199	285.24	3.2426	397.376	4.4201	275.18	3.2102	388.09	4.4207	264.73	3.2705
413.067	4.4196	291.32	3.2951	414.294	4.4198	301.41	3.291	413.438	4.4198	293.95	3.2927	410.128	4.4199	285.68	3.2415	397.504	4.4201	275.53	3.2092	388.227	4.4207	265.17	3.2694
413.15	4.4196	291.76	3.2939	414.373	4.4198	301.85	3.2899	413.526	4.4198	294.39	3.2915	410.263	4.4199	286.03	3.2404	397.63	4.4201	275.62	3.2089	388.364	4.4206	265.6	3.2683
413.233	4.4196	292.19	3.293	414.452	4.4198	302.28	3.2889	413.613	4.4198	294.83	3.2906	410.398	4.4199	286.12	3.2402	397.757	4.4201	276.05	3.2079	388.501	4.4207	266.04	3.2673
413.316	4.4198	292.63	3.292	414.531	4.4198	302.72	3.288	413.699	4.4198	295.18	3.2896	410.531	4.4199	286.47	3.2392	397.882	4.4202	276.49	3.2068	388.637	4.4207	266.48	3.2662
413.398	4.4196	293.07	3.2909	414.608	4.4198	303.16	3.287	413.786	4.4198	295.27	3.2894	410.664	4.4199	286.56	3.2389	398.006	4.4202	276.84	3.2058	388.771	4.4206	266.83	3.2652
413.479	4.4198	293.51	3.2899	414.686	4.4198	303.59	3.2859	413.871	4.4198	295.7	3.2885	410.796	4.4199	286.99	3.2378	398.13	4.4202	276.93	3.2057	388.905	4.4207	266.92	3.2649
413.561	4.4198	293.86	3.2889	414.763	4.4198	304.03	3.2849	413.956	4.4198	296.05	3.2875	410.926	4.4199	287.34	3.2368	398.253	4.4202	277.28	3.2047	389.038	4.4207	267.35	3.2638
413.641	4.4196	293.94	3.2888	414.839	4.4198	304.47	3.2839	414.041	4.4198	296.14	3.2873	411.055	4.4199	287.43	3.2365	398.376	4.4201	277.37	3.2045	389.169	4.4207	267.7	3.2628
413.722	4.4196	294.38	3.2878	414.916	4.4198	304.91	3.2828	414.125	4.4198	296.58	3.2864	411.184	4.4199	287.78	3.2355	398.498	4.4202	277.8	3.2034	389.3	4.4207	267.79	3.2626
413.801	4.4198	294.73	3.2868	414.991	4.4198	305.34	3.2818	414.209	4.4198	296.93	3.2854	411.311	4.4199	287.87	3.2354	398.619	4.4202	278.15	3.2024	389.43	4.4207	268.23	3.2615
413.881	4.4196	294.82	3.2867	415.067	4.4199	305.78	3.2807	414.291	4.4198	297.02	3.2852	411.438	4.4199	288.22	3.2344	398.739	4.4202	278.24	3.2023	389.559	4.4207	268.67	3.2604
413.959	4.4196	295.26	3.2857	415.141	4.4198	306.22	3.2797	414.374	4.4198	297.45	3.2841	411.563	4.4199	288.3	3.2341	398.859	4.4201	278.59	3.2013	389.687	4.4207	269.1	3.2593
414.038	4.4198	295.61	3.2847	415.216	4.4198	306.66	3.2786	414.456	4.4198	297.89	3.283	411.688	4.4199	288.65	3.2331	398.978	4.4201	278.68	3.2012	389.814	4.4207	269.45	3.2583
414.116	4.4196	295.69	3.2846	415.289	4.4198	307.09	3.2776	414.538	4.4198	298.33	3.2818	411.812	4.4199	288.74	3.2328	399.097	4.4202	279.03	3.2002	389.94	4.4207	269.54	3.2581
414.193	4.4198	296.13	3.2836	415.363	4.4198	307.53	3.2765	414.619	4.4198	298.77	3.2809	411.935	4.4199	289.09	3.2318	399.214	4.4202	279.12	3.1999	390.065	4.4207	269.98	3.257
414.27	4.4198	296.48	3.2826	415.436	4.4198	307.97	3.2755	414.699	4.4198	299.12	3.2799	412.057	4.4199	289.18	3.2315	399.331	4.4202	279.55	3.1989	390.19	4.4207	270.33	3.256
414.347	4.4198	296.57	3.2825	415.508	4.4198	308.41	3.2746	414.779	4.4198	299.2	3.2797	412.178	4.4199	289.53	3.2305	399.448	4.4202	279.9	3.1979	390.313	4.4207	270.42	3.2557
414.423	4.4196	297	3.2814	415.58	4.4198	308.76	3.2736	414.859	4.4198	299.64	3.2786	412.298	4.4199	289.62	3.2304	399.564	4.4202	279.99	3.1978	390.436	4.4207	270.77	3.2547
414.499	4.4196	297.44	3.2804	415.652	4.4198	308.84	3.2735	414.938	4.4198	300.08	3.2776	412.417	4.4199	289.97	3.2292	399.679	4.4202	280.34	3.1968	390.558	4.4207	270.85	3.2546
414.574	4.4196	297.88	3.2793	415.723	4.4198	309.19	3.2725	415.017	4.4198	300.52	3.2765	412.535	4.4199	290.06	3.2291	399.793	4.4202	280.43	3.1965	390.679	4.4207	271.29	3.2534
414.649	4.4198	298.32	3.2781	415.794	4.4198	309.28	3.2725	415.095	4.4198	300.87	3.2755	412.653	4.4199	290.4	3.2279	399.907	4.4202	280.87	3.1953	390.799	4.4207	271.73	3.2523
414.723	4.4198	298.75	3.2772	415.864	4.4198	309.63	3.2715	415.173	4.4196	300.95	3.2754	412.769	4.4199	290.49	3.2278	400.02	4.4201	281.3	3.1942	390.918	4.4207	272.08	3.2513
414.797	4.4196	299.1	3.2762	415.934	4.4198	309.72	3.2714	415.25	4.4198	301.3	3.2744	412.885	4.4199	290.84	3.2268	400.133	4.4202	281.65	3.1932	391.036	4.4207	272.17	3.2512
414.871	4.4198	299.19	3.276	416.004	4.4198	310.07	3.2704	415.327	4.4198	301.39	3.2743	413	4.4199	290.93	3.2265	400.245	4.4202	281.74	3.1931	391.154	4.4207	272.52	3.2501
414.944	4.4196	299.63	3.2749	416.073	4.4199	310.16	3.2702	415.403	4.4198	301.83	3.2731	413.114	4.4199	291.28	3.2254	400.356	4.4201	282.09	3.1921	391.271	4.4207	272.6	3.2499
415.017	4.4198	300.07	3.2739	416.142	4.4198	310.59	3.2693	415.479	4.4198	302.27	3.2722	413.227	4.4199	291.37	3.2252	400.467	4.4201	282.18	3.1918	391.387	4.4207	272.95	3.2489
415.089	4.4196	300.5	3.2728	416.21	4.4198	310.94	3.2683	415.555	4.4198	302.62	3.2712	413.34	4.4201	291.72	3.2242	400.577	4.4202	282.62	3.1907	391.502	4.4207	273.04	3.2488
415.161	4.4198	300.85	3.2718	416.279	4.4198	311.03	3.2681	415.63	4.4198	302.7	3.271	413.451	4.4199	291.81	3.2239	400.686	4.4202	282.97	3.1897	391.617	4.4207	273.39	3.2478
415.233	4.4196	300.94	3.2717	416.346	4.4198	311.47	3.267	415.704	4.4198	303.14	3.2697	413.562	4.4199	292.15	3.2229	400.795	4.4202	283.05	3.1895	391.73	4.4207	273.48	3.2475
415.304	4.4196	301.38	3.2705	416.413	4.4198	311.91	3.266	415.779	4.4196	303.58	3.2688	413.672	4.4199	292.24	3.2226	400.904	4.4202	283.49	3.1882	391.843	4.4206	273.92	3.2463
415.375	4.4196	301.82	3.2696	416.48	4.4199	312.34	3.2649	415.852	4.4198	303.93	3.2678	413.781	4.4199	292.59	3.2215	401.011	4.4201	283.93	3.1871	391.955	4.4207	274.35	3.2452
415.445	4.4196	302.17	3.2686	416.547	4.4198	312.78	3.2638	415.925	4.4198	304.01	3.2675	413.89	4.4199	292.68	3.2212	401.118	4.4202	284.28	3.1861	392.067	4.4207	274.7	3.2442
415.515	4.4196	302.25	3.2684	416.613	4.4198	313.22	3.2628	415.998	4.4198	304.45	3.2665	413.997	4.4199	293.03	3.2202	401.225	4.4201	284.37	3.186	392.177	4.4207	274.79	3.2439
415.585	4.4198	302.69	3.2673	416.678	4.4198	313.57	3.2618	416.071	4.4198	304.8	3.2655	414.104	4.4199	293.12	3.22	401.331	4.4201	284.72	3.185	392.288	4.4207	275.23	3.2428
415.655	4.4198	303.13	3.2662	416.744	4.4198	313.66	3.2617	416.143	4.4196	304.89	3.2654	414.21	4.4199	293.47	3.2189	401.436	4.4202	284.8	3.1849	392.397	4.4207	275.58	3.2418
415.724	4.4198	303.48	3.2652	416.809	4.4198	314.01	3.2607	416.214	4.4198	305.24	3.2644	414.316	4.4199	293.55	3.2186	401.541	4.4201	285.15	3.1839	392.505	4.4207	275.67	3.2415
415.792	4.4198	303.57	3.2651	416.873	4.4198	314.09	3.2605	416.286	4.4198	305.33	3.2643	414.42	4.4199	293.9	3.2176	401.645	4.4201	285.24	3.1836	392.613	4.4207	276.02	3.2405
415.861	4.4198	303.92	3.2641	416.938	4.4198	314.53	3.2594	416.356	4.4198	305.68	3.2633	414.524	4.4199	293.99	3.2173	401.749	4.4202	285.68	3.1824	392.72	4.4207	276.11	3.2404
415.928	4.4198	304	3.2639	417.001	4.4198	314.97	3.2583	416.427	4.4198	305.76	3.263	414.628	4.4199	294.34	3.2162	401.852	4.4202	286.12	3.1811	392.827	4.4207	276.46	3.2394
415.996	4.4196	304.44	3.2628	417.065	4.4198	315.41	3.2573	416.497	4.4198	306.2	3.262	414.73	4.4201	294.43	3.2158	401.955	4.4201	286.55	3.18	392.933	4.4207	276.54	3.2391
416.063	4.4196	304.79	3.2618	417.128	4.4198	315.76	3.2563	416.566	4.4198	306.55	3.261	414.832	4.4199	294.87	3.2145	402.057	4.4201	286.9	3.179	393.038	4.4207	276.89	3.2381
416.129	4.4198	304.88	3.2617	417.191	4.4198	315.84	3.2562	416.635	4.4198	306.64	3.2607	414.933	4.4199	295.3	3.2133	402.158	4.4202	286.99	3.1789	393.142	4.4207	276.98	3.2379
416.196	4.4196	305.23	3.2607	417.253	4.4198	316.19	3.2552	416.704	4.4198	307.08	3.2596	415.033	4.4199	295.65	3.2121	402.259	4.4201	287.34	3.1779	393.246	4.4207	277.42	3.2367
416.262	4.4196	305.32	3.2605	417.315	4.4199	316.28	3.2551	416.772	4.4196	307.51	3.2584	415.133	4.4201	295.74	3.212	402.36	4.4202	287.43	3.1776	393.349	4.4207	277.77	3.2357
416.327	4.4196	305.75	3.2594	417.377	4.4199	316.72	3.2539	416.84	4.4198	307.95	3.2573	415.232	4.4199	296.09	3.2108	402.46	4.4202	287.78	3.1766	393.451	4.4207	277.86	3.2354
416.392	4.4196	306.1	3.2584	417.439	4.4198	317.16	3.253	416.908	4.4198	308.3	3.2563	415.33	4.4199	296.18	3.2105	402.559	4.4201	287.87	3.1763	393.553	4.4207	278.21	3.2344
416.457	4.4196	306.19	3.2583	417.5	4.4198	317.51	3.252	416.975	4.4198	308.39	3.2562	415.428	4.4199	296.53	3.2094	402.658	4.4202	288.3	3.1752	393.654	4.4207	278.29	3.2342
416.522	4.4196	306.54	3.2573	417.561	4.4198	317.59	3.2517	417.042	4.4198	308.74	3.2552	415.525	4.4201	296.62	3.2091	402.756	4.4201	288.65	3.1742	393.755	4.4207	278.73	3.2329
416.586	4.4196	306.63	3.2572	417.621	4.4198	318.03	3.2507	417.108	4.4198	308.83	3.2551	415.621	4.4199	296.97	3.2081	402.854	4.4202	288.74	3.1739	393.854	4.4207	279.17	3.2318
416.65	4.4196	306.98	3.2562	417.681	4.4198	318.38	3.2497	417.174	4.4198	309.18	3.2541	415.717	4.4199	297.05	3.2078	402.952	4.4202	289.09	3.1729	393.954	4.4207	279.52	3.2307
416.714	4.4198	307.06	3.256	417.741	4.4198	318.47	3.2496	417.24	4.4198	309.26	3.2539	415.812	4.4199	297.4	3.2066	403.048	4.4202	289.18	3.1728	394.052	4.4207	279.61	3.2305
416.777	4.4196	307.5	3.2549	417.8	4.4198	318.82	3.2486	417.306	4.4198	309.7	3.2526	415.906	4.4199	297.49	3.2063	403.145	4.4202	289.53	3.1718	394.15	4.4207	280.04	3.2292
416.84	4.4198	307.85	3.2539	417.859	4.4198	318.91	3.2484	417.371	4.4198	310.14	3.2517	415.999	4.4199	297.84	3.2052	403.24	4.4201	289.62	3.1715	394.248	4.4207	280.48	3.2279
416.902	4.4196	307.94	3.2538	417.918	4.4198	319.34	3.2473	417.435	4.4198	310.49	3.2505	416.092	4.4199	297.93	3.205	403.336	4.4202	289.97	3.1705	394.344	4.4207	280.92	3.2267
416.964	4.4198	308.29	3.2528	417.977	4.4198	319.69	3.2463	417.5	4.4198	310.58	3.2504	416.185	4.4199	298.28	3.2039	403.43	4.4201	290.05	3.1703	394.44	4.4207	281.27	3.2257
417.026	4.4198	308.38	3.2526	418.035	4.4198	319.78	3.2462	417.564	4.4198	310.93	3.2494	416.276	4.4199	298.37	3.2036	403.525	4.4202	290.4	3.1692	394.536	4.4206	281.36	3.2254
417.088	4.4196	308.81	3.2515	418.093	4.4198	320.13	3.2452	417.627	4.4198	311.01	3.2492	416.368	4.4199	298.72	3.2024	403.619	4.4202	290.49	3.169	394.631	4.4207	281.71	3.2244
417.149	4.4198	309.16	3.2505	418.15	4.4198	320.22	3.245	417.69	4.4198	311.45	3.248	416.458	4.4199	298.8	3.2021	403.712	4.4202	290.93	3.1677	394.725	4.4207	281.79	3.2242
417.21	4.4196	309.25	3.2502	418.208	4.4198	320.66	3.2439	417.753	4.4198	311.8	3.247	416.548	4.4201	299.24	3.2008	403.805	4.4202	291.37	3.1665	394.819	4.4207	282.14	3.2231
417.271	4.4196	309.69	3.2491	418.264	4.4198	321.09	3.2428	417.815	4.4198	311.89	3.2468	416.638	4.4199	299.59	3.1995	403.897	4.4201	291.8	3.1653	394.912	4.4207	282.23	3.2229
417.331	4.4196	310.13	3.2481	418.321	4.4198	321.44	3.2418	417.878	4.4198	312.33	3.2457	416.726	4.4199	299.68	3.1994	403.989	4.4202	292.15	3.1642	395.005	4.4207	282.58	3.2218
417.392	4.4196	310.48	3.247	418.377	4.4198	321.53	3.2417	417.94	4.4198	312.68	3.2447	416.815	4.4199	299.94	3.1984	404.08	4.4202	292.24	3.164	395.097	4.4207	282.67	3.2216
417.451	4.4196	310.56	3.2468	418.433	4.4199	321.88	3.2407	418.001	4.4198	312.76	3.2444	416.902	4.4199	300.12	3.1979	404.171	4.4202	292.68	3.1627	395.188	4.4207	283.11	3.2204
417.511	4.4196	311	3.2457	418.489	4.4198	321.97	3.2405	418.062	4.4198	313.11	3.2434	416.989	4.4199	300.47	3.1966	404.262	4.4202	293.12	3.1616	395.279	4.4207	283.46	3.2192
417.57	4.4196	311.35	3.2447	418.544	4.4198	322.41	3.2394	418.123	4.4198	313.2	3.2433	417.075	4.4201	300.55	3.1965	404.352	4.4201	293.47	3.1605	395.37	4.4207	283.54	3.2191
417.629	4.4198	311.44	3.2444	418.599	4.4198	322.76	3.2384	418.183	4.4198	313.55	3.2423	417.161	4.4199	300.82	3.1955	404.441	4.4202	293.55	3.1603	395.46	4.4207	283.89	3.2181
417.687	4.4196	311.79	3.2434	418.654	4.4198	322.84	3.2381	418.243	4.4198	313.64	3.242	417.247	4.4199	300.99	3.195	404.53	4.4202	293.9	3.1592	395.549	4.4207	283.98	3.2178
417.745	4.4196	311.88	3.2433	418.709	4.4198	323.28	3.237	418.303	4.4198	314.08	3.241	417.331	4.4199	301.34	3.1939	404.619	4.4202	293.99	3.1589	395.638	4.4207	284.33	3.2166
417.803	4.4196	312.23	3.2423	418.763	4.4198	323.72	3.2358	418.363	4.4198	314.43	3.2399	417.415	4.4199	301.43	3.1936	404.707	4.4202	294.34	3.1579	395.726	4.4207	284.42	3.2165
417.861	4.4198	312.31	3.2421	418.817	4.4198	324.16	3.2347	418.422	4.4198	314.51	3.2397	417.499	4.4199	301.69	3.1926	404.795	4.4201	294.43	3.1577	395.814	4.4207	284.77	3.2154
417.918	4.4196	312.75	3.241	418.871	4.4198	324.59	3.2336	418.48	4.4198	314.95	3.2384	417.582	4.4199	301.87	3.192	404.882	4.4201	294.87	3.1565	395.901	4.4207	284.86	3.2152
417.975	4.4196	313.1	3.24	418.924	4.4198	324.94	3.2326	418.539	4.4198	315.39	3.2373	417.665	4.4199	302.22	3.1908	404.969	4.4201	295.22	3.1555	395.988	4.4207	285.21	3.2141
418.032	4.4196	313.19	3.2397	418.977	4.4198	325.03	3.2323	418.597	4.4198	315.74	3.2363	417.747	4.4199	302.3	3.1905	405.055	4.4201	295.3	3.1552	396.074	4.4207	285.29	3.2137
418.089	4.4196	313.63	3.2386	419.03	4.4198	325.47	3.2312	418.655	4.4198	315.83	3.236	417.828	4.4199	302.65	3.1894	405.141	4.4202	295.65	3.1542	396.16	4.4207	285.73	3.2125
418.145	4.4198	314.06	3.2375	419.082	4.4198	325.91	3.23	418.713	4.4196	316.18	3.235	417.909	4.4199	302.74	3.1891	405.226	4.4201	295.74	3.1539	396.245	4.4207	286.08	3.2115
418.201	4.4198	314.41	3.2365	419.135	4.4198	326.34	3.2289	418.77	4.4196	316.26	3.2349	417.989	4.4199	303.09	3.1879	405.312	4.4201	296.09	3.1529	396.329	4.4207	286.17	3.2112
418.256	4.4196	314.5	3.2363	419.187	4.4198	326.69	3.2279	418.827	4.4196	316.61	3.2339	418.069	4.4199	303.18	3.1876	405.396	4.4202	296.18	3.1526	396.414	4.4207	286.52	3.2102
418.311	4.4196	314.94	3.235	419.238	4.4198	326.78	3.2276	418.883	4.4198	316.7	3.2336	418.149	4.4199	303.44	3.1866	405.48	4.4202	296.53	3.1516	396.497	4.4207	286.61	3.2099
418.366	4.4198	315.38	3.2339	419.29	4.4198	327.22	3.2265	418.94	4.4198	317.05	3.2326	418.227	4.4199	303.62	3.186	405.564	4.4201	296.62	3.1513	396.58	4.4207	286.96	3.2089
418.421	4.4196	315.73	3.2329	419.341	4.4198	327.57	3.2255	418.995	4.4198	317.14	3.2325	418.306	4.4201	303.97	3.1849	405.647	4.4201	296.97	3.1503	396.663	4.4207	287.04	3.2086
418.476	4.4198	315.81	3.2326	419.392	4.4198	327.66	3.2254	419.051	4.4198	317.49	3.2313	418.384	4.4199	304.05	3.1845	405.73	4.4202	297.05	3.15	396.745	4.4207	287.39	3.2074
418.53	4.4198	316.25	3.2315	419.443	4.4198	328.01	3.2244	419.107	4.4198	317.57	3.2312	418.461	4.4199	304.4	3.1832	405.813	4.4201	297.4	3.1489	396.827	4.4209	287.48	3.2071
418.584	4.4196	316.6	3.2305	419.493	4.4198	328.09	3.2242	419.162	4.4196	317.92	3.2302	418.538	4.4199	304.49	3.1831	405.895	4.4201	297.49	3.1487	396.908	4.4207	287.92	3.2058
418.637	4.4196	316.69	3.2302	419.543	4.4199	328.53	3.2229	419.216	4.4198	318.01	3.23	418.614	4.4199	304.75	3.1821	405.976	4.4201	297.84	3.1476	396.989	4.4207	288.27	3.2047
418.691	4.4196	317.12	3.2291	419.593	4.4199	328.97	3.2218	419.271	4.4198	318.36	3.2289	418.69	4.4199	304.93	3.1815	406.058	4.4202	297.93	3.1474	397.069	4.4207	288.36	3.2044
418.743	4.4198	317.47	3.2281	419.643	4.4198	329.32	3.2208	419.325	4.4198	318.45	3.2287	418.766	4.4199	305.28	3.1802	406.139	4.4202	298.28	3.1463	397.149	4.4207	288.71	3.2034
418.796	4.4196	317.56	3.2279	419.692	4.4199	329.41	3.2205	419.379	4.4198	318.89	3.2275	418.841	4.4199	305.37	3.1799	406.219	4.4201	298.37	3.1461	397.228	4.4207	288.79	3.2031
418.849	4.4196	317.91	3.2268	419.741	4.4198	329.84	3.2192	419.433	4.4198	319.24	3.2265	418.915	4.4199	305.72	3.1787	406.299	4.4201	298.72	3.145	397.307	4.4207	289.14	3.2021
418.901	4.4196	318	3.2267	419.79	4.4198	330.28	3.2181	419.487	4.4198	319.32	3.2263	418.989	4.4199	305.8	3.1784	406.379	4.4202	298.8	3.1447	397.386	4.4207	289.23	3.2018
418.953	4.4196	318.35	3.2257	419.839	4.4198	330.63	3.2171	419.54	4.4198	319.76	3.225	419.063	4.4199	306.07	3.1774	406.458	4.4202	299.15	3.1437	397.464	4.4207	289.58	3.2007
419.005	4.4198	318.44	3.2255	419.887	4.4198	330.72	3.217	419.592	4.4198	320.11	3.2239	419.136	4.4199	306.24	3.1768	406.537	4.4201	299.24	3.1434	397.541	4.4207	289.67	3.2005
419.057	4.4196	318.79	3.2244	419.935	4.4198	331.07	3.216	419.645	4.4198	320.2	3.2237	419.208	4.4199	306.5	3.1758	406.616	4.4201	299.59	3.1424	397.618	4.4207	290.02	3.1994
419.108	4.4196	318.87	3.2242	419.983	4.4198	331.16	3.2157	419.697	4.4198	320.64	3.2225	419.281	4.4199	306.68	3.1753	406.694	4.4202	299.68	3.1421	397.695	4.4207	290.11	3.1991
419.159	4.4196	319.31	3.2229	420.03	4.4198	331.51	3.2147	419.749	4.4198	320.99	3.2215	419.352	4.4199	306.94	3.1742	406.772	4.4202	300.03	3.1411	397.771	4.4207	290.46	3.1981
419.21	4.4196	319.75	3.2218	420.078	4.4199	331.59	3.2145	419.801	4.4196	321.07	3.2212	419.424	4.4199	307.12	3.1736	406.849	4.4201	300.12	3.1408	397.847	4.4207	290.54	3.1978
419.26	4.4196	320.1	3.2208	420.125	4.4199	331.94	3.2134	419.852	4.4196	321.42	3.2202	419.495	4.4199	307.47	3.1724	406.926	4.4201	300.47	3.1397	397.923	4.4207	290.89	3.1966
419.311	4.4196	320.19	3.2205	420.172	4.4198	332.03	3.2133	419.903	4.4196	321.51	3.22	419.565	4.4199	307.55	3.1721	407.003	4.4201	300.55	3.1393	397.998	4.4207	290.98	3.1963
419.361	4.4196	320.62	3.2192	420.219	4.4198	332.38	3.2123	419.954	4.4198	321.95	3.2187	419.635	4.4199	307.82	3.171	407.079	4.4201	300.99	3.1381	398.072	4.4207	291.33	3.1952
419.411	4.4196	321.06	3.2181	420.265	4.4199	332.47	3.212	420.005	4.4198	322.39	3.2175	419.705	4.4201	307.99	3.1703	407.155	4.4202	301.34	3.1371	398.146	4.4207	291.42	3.195
419.46	4.4198	321.41	3.2171	420.311	4.4198	332.82	3.211	420.055	4.4198	322.74	3.2165	419.774	4.4199	308.34	3.169	407.23	4.4201	301.43	3.1368	398.22	4.4207	291.77	3.1939
419.51	4.4198	321.5	3.2168	420.357	4.4198	332.91	3.2108	420.105	4.4198	322.82	3.2162	419.843	4.4199	308.43	3.1687	407.305	4.4202	301.78	3.1356	398.293	4.4207	291.86	3.1936
419.558	4.4196	321.85	3.2158	420.402	4.4198	333.26	3.2097	420.155	4.4198	323.17	3.2152	419.911	4.4199	308.69	3.1677	407.38	4.4202	301.87	3.1353	398.366	4.4209	292.21	3.1924
419.608	4.4198	321.94	3.2155	420.448	4.4198	333.34	3.2095	420.204	4.4196	323.26	3.2149	419.979	4.4201	308.87	3.1671	407.455	4.4202	302.22	3.1343	398.438	4.4207	292.3	3.1921
419.656	4.4198	322.37	3.2144	420.493	4.4198	333.78	3.2083	420.254	4.4196	323.61	3.2139	420.046	4.4199	309.13	3.1661	407.529	4.4202	302.3	3.134	398.51	4.4207	292.65	3.1911
419.704	4.4196	322.72	3.2134	420.538	4.4198	334.13	3.2073	420.303	4.4196	323.7	3.2136	420.114	4.4199	309.3	3.1655	407.603	4.4201	302.65	3.1329	398.582	4.4207	292.73	3.1908
419.752	4.4196	322.81	3.2131	420.583	4.4198	334.22	3.207	420.352	4.4198	324.05	3.2126	420.18	4.4199	309.57	3.1645	407.676	4.4201	302.74	3.1326	398.653	4.4207	293.08	3.1897
419.8	4.4196	323.16	3.2121	420.627	4.4198	334.57	3.206	420.401	4.4198	324.14	3.2123	420.247	4.4199	309.74	3.1639	407.749	4.4202	303.09	3.1316	398.724	4.4207	293.17	3.1894
419.848	4.4196	323.25	3.2118	420.672	4.4198	334.65	3.2057	420.449	4.4198	324.49	3.2113	420.312	4.4199	310	3.1627	407.821	4.4202	303.18	3.1313	398.795	4.4207	293.52	3.1882
419.895	4.4198	323.6	3.2108	420.716	4.4198	335	3.2047	420.497	4.4198	324.57	3.211	420.378	4.4199	310.18	3.1621	407.894	4.4201	303.53	3.1301	398.865	4.4207	293.61	3.1881
419.943	4.4198	323.69	3.2107	420.76	4.4198	335.09	3.2045	420.545	4.4198	324.92	3.21	420.443	4.4199	310.44	3.161	407.966	4.4202	303.62	3.1298	398.935	4.4207	293.87	3.1871
419.99	4.4198	324.04	3.2095	420.803	4.4198	335.44	3.2034	420.592	4.4198	325.01	3.2097	420.507	4.4199	310.62	3.1603	408.037	4.4202	304.05	3.1285	399.004	4.4207	294.05	3.1866
420.036	4.4198	324.12	3.2094	420.846	4.4198	335.53	3.2033	420.64	4.4198	325.36	3.2087	420.572	4.4199	310.97	3.159	408.109	4.4201	304.4	3.1274	399.073	4.4207	294.4	3.1855
420.083	4.4198	324.47	3.2084	420.89	4.4198	335.88	3.2023	420.687	4.4198	325.45	3.2084	420.635	4.4199	311.05	3.1587	408.18	4.4202	304.49	3.1272	399.141	4.4207	294.48	3.1852
420.13	4.4198	324.56	3.2081	420.933	4.4198	335.97	3.202	420.734	4.4198	325.8	3.2074	420.699	4.4201	311.32	3.1576	408.25	4.4202	304.84	3.1261	399.209	4.4207	294.83	3.184
420.175	4.4196	324.91	3.2071	420.976	4.4198	336.32	3.201	420.78	4.4198	325.89	3.2071	420.762	4.4199	311.49	3.1569	408.32	4.4202	304.93	3.1258	399.277	4.4207	294.92	3.1837
420.221	4.4196	325	3.2068	421.018	4.4198	336.4	3.2007	420.827	4.4198	326.32	3.2058	420.825	4.4199	311.84	3.1556	408.39	4.4202	305.28	3.1247	399.345	4.4207	295.27	3.1826
420.267	4.4196	325.35	3.2058	421.061	4.4198	336.75	3.1997	420.873	4.4198	326.76	3.2045	420.887	4.4199	311.93	3.1553	408.46	4.4202	305.37	3.1243	399.412	4.4207	295.36	3.1823
420.312	4.4196	325.44	3.2055	421.103	4.4198	336.84	3.1995	420.919	4.4198	327.2	3.2033	420.949	4.4199	312.19	3.1542	408.529	4.4202	305.8	3.123	399.479	4.4207	295.71	3.1811
420.358	4.4196	325.79	3.2045	421.145	4.4198	337.19	3.1984	420.964	4.4198	327.55	3.2023	421.011	4.4199	312.37	3.1535	408.598	4.4201	306.15	3.1219	399.545	4.4207	295.8	3.1808
420.403	4.4196	325.87	3.2042	421.187	4.4198	337.28	3.1981	421.01	4.4198	327.64	3.202	421.073	4.4201	312.63	3.1524	408.667	4.4202	306.24	3.1216	399.611	4.4207	296.23	3.1795
420.448	4.4196	326.31	3.2029	421.228	4.4198	337.63	3.1971	421.055	4.4198	327.99	3.2008	421.134	4.4199	312.8	3.1518	408.735	4.4201	306.59	3.1205	399.677	4.4207	296.58	3.1784
420.492	4.4196	326.75	3.2018	421.27	4.4198	337.72	3.197	421.1	4.4198	328.07	3.2007	421.194	4.4199	313.07	3.1506	408.803	4.4202	306.68	3.1201	399.742	4.4207	296.67	3.1781
420.537	4.4196	327.1	3.2007	421.311	4.4198	338.07	3.1958	421.145	4.4198	328.42	3.1995	421.255	4.4199	313.24	3.15	408.871	4.4202	307.03	3.119	399.807	4.4206	297.02	3.1769
420.581	4.4196	327.19	3.2005	421.352	4.4198	338.15	3.1955	421.19	4.4198	328.51	3.1992	421.314	4.4199	313.5	3.1489	408.938	4.4202	307.12	3.1189	399.872	4.4207	297.11	3.1766
420.625	4.4198	327.54	3.1994	421.393	4.4198	338.5	3.1945	421.234	4.4198	328.86	3.1982	421.374	4.4199	313.68	3.1482	409.005	4.4201	307.47	3.1177	399.936	4.4207	297.46	3.1755
420.669	4.4196	327.62	3.1992	421.433	4.4198	338.59	3.1942	421.279	4.4198	328.95	3.1979	421.433	4.4199	313.94	3.1471	409.072	4.4202	307.55	3.1174	400	4.4206	297.55	3.1752
420.712	4.4196	327.97	3.1981	421.473	4.4198	338.94	3.1932	421.322	4.4198	329.3	3.1968	421.492	4.4201	314.12	3.1464	409.138	4.4201	307.9	3.1163	400.063	4.4207	297.9	3.174
420.756	4.4196	328.06	3.1979	421.514	4.4198	339.03	3.1929	421.366	4.4196	329.39	3.1965	421.551	4.4199	314.38	3.1453	409.204	4.4202	307.99	3.1159	400.127	4.4207	297.98	3.1737
420.799	4.4196	328.41	3.1968	421.553	4.4198	339.47	3.1916	421.41	4.4198	329.74	3.1955	421.609	4.4201	314.55	3.1445	409.27	4.4202	308.34	3.1148	400.19	4.4207	298.33	3.1726
420.842	4.4196	328.5	3.1966	421.593	4.4198	339.9	3.1903	421.453	4.4198	329.82	3.1953	421.667	4.4199	314.82	3.1434	409.336	4.4202	308.43	3.1147	400.252	4.4207	298.42	3.1723
420.885	4.4196	328.85	3.1955	421.633	4.4198	340.34	3.1891	421.496	4.4198	330.17	3.1942	421.725	4.4199	314.99	3.1426	409.401	4.4202	308.69	3.1137	400.314	4.4207	298.77	3.1711
420.927	4.4196	328.93	3.1953	421.672	4.4198	340.69	3.1879	421.539	4.4198	330.26	3.1939	421.782	4.4199	315.25	3.1416	409.466	4.4202	308.87	3.113	400.377	4.4207	298.86	3.1708
420.97	4.4198	329.28	3.1942	421.711	4.4198	340.78	3.1878	421.581	4.4198	330.61	3.1928	421.839	4.4201	315.43	3.1408	409.53	4.4201	309.22	3.1119	400.438	4.4207	299.12	3.1698
421.012	4.4198	329.37	3.1941	421.75	4.4199	341.13	3.1866	421.624	4.4198	330.7	3.1926	421.896	4.4199	315.69	3.1397	409.595	4.4201	309.3	3.1117	400.5	4.4207	299.3	3.1694
421.054	4.4196	329.63	3.1931	421.789	4.4198	341.22	3.1865	421.666	4.4198	331.05	3.1915	421.952	4.4199	315.87	3.139	409.659	4.4201	309.65	3.1105	400.561	4.4207	299.56	3.1684
421.096	4.4196	329.81	3.1928	421.828	4.4198	341.48	3.1855	421.708	4.4198	331.13	3.1911	422.008	4.4201	316.13	3.1379	409.722	4.4201	309.74	3.1101	400.622	4.4207	299.73	3.1679
421.137	4.4196	330.16	3.1916	421.866	4.4198	341.65	3.185	421.75	4.4198	331.48	3.19	422.064	4.4199	316.3	3.1371	409.786	4.4202	310.09	3.109	400.682	4.4207	300	3.1669
421.178	4.4196	330.25	3.1913	421.905	4.4198	342	3.184	421.791	4.4198	331.57	3.1899	422.119	4.4201	316.57	3.136	409.849	4.4201	310.18	3.1088	400.742	4.4207	300.17	3.1663
421.22	4.4196	330.6	3.1903	421.943	4.4198	342.09	3.1837	421.833	4.4198	331.92	3.1887	422.174	4.4199	316.74	3.1351	409.912	4.4202	310.53	3.1076	400.802	4.4207	300.52	3.1652
421.261	4.4196	330.68	3.19	421.98	4.4198	342.44	3.1826	421.874	4.4198	332.01	3.1884	422.229	4.4199	317	3.134	409.975	4.4202	310.62	3.1072	400.861	4.4207	300.61	3.1648
421.302	4.4196	331.12	3.1887	422.018	4.4198	342.53	3.1823	421.915	4.4198	332.36	3.1874	422.283	4.4199	317.18	3.1332	410.037	4.4202	310.97	3.1061	400.921	4.4207	300.96	3.1637
421.342	4.4196	331.47	3.1876	422.056	4.4198	342.88	3.1811	421.956	4.4198	332.45	3.1871	422.337	4.4199	317.44	3.1321	410.099	4.4201	311.05	3.1058	400.979	4.4207	301.05	3.1634
421.383	4.4196	331.56	3.1874	422.093	4.4198	342.97	3.181	421.996	4.4198	332.8	3.186	422.391	4.4199	317.62	3.1313	410.161	4.4201	311.32	3.1048	401.038	4.4207	301.31	3.1624
421.423	4.4196	331.91	3.1863	422.13	4.4198	343.32	3.1799	422.037	4.4198	332.88	3.1857	422.445	4.4199	317.88	3.13	410.222	4.4202	311.49	3.1043	401.096	4.4207	301.48	3.1619
421.463	4.4198	332	3.1861	422.167	4.4198	343.4	3.1795	422.077	4.4198	333.23	3.1847	422.498	4.4199	318.05	3.1292	410.283	4.4202	311.84	3.1032	401.154	4.4207	301.83	3.1606
421.503	4.4196	332.35	3.185	422.204	4.4198	343.84	3.1782	422.116	4.4198	333.32	3.1844	422.551	4.4199	318.32	3.128	410.344	4.4201	311.93	3.1029	401.212	4.4209	301.92	3.1603
421.543	4.4198	332.43	3.1847	422.241	4.4198	344.19	3.1771	422.156	4.4198	333.67	3.1832	422.604	4.4201	318.49	3.1274	410.404	4.4202	312.28	3.1017	401.269	4.4207	302.27	3.1592
421.582	4.4196	332.78	3.1836	422.277	4.4198	344.28	3.1769	422.196	4.4198	333.76	3.1829	422.656	4.4199	318.67	3.1264	410.465	4.4201	312.37	3.1014	401.326	4.4207	302.36	3.1589
421.622	4.4196	332.87	3.1834	422.313	4.4198	344.63	3.1758	422.235	4.4198	334.11	3.1818	422.709	4.4199	318.93	3.1253	410.525	4.4202	312.72	3.1001	401.383	4.4207	302.62	3.1579
421.661	4.4196	333.22	3.1823	422.35	4.4198	344.72	3.1755	422.274	4.4198	334.2	3.1816	422.76	4.4199	319.19	3.1242	410.585	4.4202	312.8	3.0998	401.44	4.4207	302.8	3.1573
421.7	4.4198	333.31	3.1821	422.386	4.4198	345.07	3.1744	422.313	4.4196	334.55	3.1805	422.812	4.4199	319.37	3.1234	410.644	4.4201	313.15	3.0987	401.496	4.4206	303.15	3.1561
421.739	4.4198	333.66	3.181	422.421	4.4198	345.15	3.174	422.352	4.4196	334.63	3.1802	422.863	4.4199	319.54	3.1224	410.703	4.4201	313.24	3.0984	401.552	4.4207	303.23	3.1558
421.778	4.4196	333.75	3.1807	422.457	4.4198	345.59	3.1728	422.39	4.4196	334.98	3.179	422.914	4.4199	319.8	3.1213	410.762	4.4201	313.59	3.0972	401.607	4.4206	303.58	3.1547
421.816	4.4196	334.1	3.1795	422.493	4.4198	345.94	3.1716	422.429	4.4198	335.07	3.1787	422.965	4.4199	320.07	3.12	410.821	4.4201	313.68	3.0969	401.663	4.4207	303.67	3.1544
421.854	4.4198	334.18	3.1794	422.528	4.4198	346.03	3.1713	422.467	4.4196	335.42	3.1776	423.015	4.4199	320.24	3.1192	410.879	4.4202	313.94	3.0959	401.718	4.4207	303.93	3.1534
421.893	4.4198	334.53	3.1782	422.563	4.4198	346.38	3.1702	422.505	4.4198	335.51	3.1774	423.065	4.4199	320.5	3.1179	410.937	4.4201	314.12	3.0953	401.773	4.4207	304.11	3.1527
421.931	4.4196	334.62	3.1779	422.598	4.4198	346.47	3.1698	422.543	4.4196	335.86	3.1761	423.115	4.4199	320.68	3.1171	410.995	4.4201	314.47	3.0942	401.827	4.4207	304.46	3.1514
421.969	4.4198	334.97	3.1769	422.633	4.4198	346.82	3.1687	422.581	4.4196	335.95	3.176	423.165	4.4199	320.94	3.1159	411.053	4.4202	314.55	3.094	401.882	4.4207	304.55	3.1513
422.006	4.4196	335.06	3.1766	422.668	4.4198	346.9	3.1686	422.618	4.4196	336.3	3.1748	423.214	4.4199	321.12	3.115	411.11	4.4201	314.82	3.093	401.936	4.4207	304.81	3.1503
422.044	4.4196	335.41	3.1755	422.702	4.4198	347.25	3.1674	422.656	4.4196	336.38	3.1745	423.263	4.4199	321.38	3.1138	411.167	4.4202	314.99	3.0924	401.99	4.4207	304.98	3.1497
422.081	4.4196	335.5	3.1753	422.737	4.4198	347.34	3.1671	422.693	4.4198	336.73	3.1734	423.312	4.4199	321.55	3.1129	411.224	4.4202	315.25	3.0914	402.043	4.4206	305.33	3.1485
422.118	4.4196	335.85	3.1742	422.771	4.4198	347.69	3.166	422.73	4.4198	336.82	3.1731	423.361	4.4199	321.82	3.1116	411.281	4.4201	315.43	3.0908	402.096	4.4207	305.42	3.1482
422.155	4.4196	335.93	3.1739	422.805	4.4198	347.78	3.1656	422.767	4.4198	337.17	3.1719	423.409	4.4199	321.99	3.1108	411.337	4.4201	315.78	3.0896	402.149	4.4207	305.77	3.1469
422.192	4.4196	336.28	3.1728	422.839	4.4198	348.13	3.1645	422.804	4.4196	337.26	3.1716	423.457	4.4201	322.17	3.1098	411.393	4.4201	315.87	3.0893	402.202	4.4207	305.86	3.1466
422.229	4.4196	336.37	3.1724	422.873	4.4198	348.22	3.1642	422.84	4.4198	337.61	3.1705	423.505	4.4199	322.43	3.1087	411.449	4.4202	316.22	3.088	402.255	4.4207	306.12	3.1456
422.265	4.4196	336.81	3.1711	422.907	4.4198	348.57	3.1631	422.877	4.4198	337.7	3.1702	423.552	4.4199	322.6	3.1077	411.505	4.4201	316.3	3.0877	402.307	4.4207	306.3	3.1452
422.302	4.4198	337.16	3.17	422.94	4.4198	348.65	3.1627	422.913	4.4198	338.05	3.169	423.6	4.4199	322.87	3.1064	411.56	4.4201	316.65	3.0866	402.359	4.4207	306.56	3.1442
422.338	4.4198	337.25	3.1697	422.973	4.4198	349	3.1616	422.949	4.4196	338.13	3.1689	423.647	4.4199	323.13	3.1051	411.615	4.4201	316.74	3.0863	402.411	4.4206	306.73	3.1435
422.374	4.4198	337.6	3.1687	423.006	4.4198	349.09	3.1613	422.985	4.4198	338.4	3.1679	423.694	4.4201	323.3	3.1042	411.67	4.4202	317	3.0853	402.462	4.4207	307.08	3.1423
422.41	4.4196	337.68	3.1684	423.039	4.4198	349.44	3.1602	423.02	4.4198	338.57	3.1673	423.74	4.4199	323.48	3.1032	411.725	4.4201	317.18	3.0846	402.514	4.4207	307.17	3.1419
422.446	4.4196	337.95	3.1674	423.072	4.4198	349.53	3.1598	423.056	4.4198	338.92	3.1661	423.787	4.4199	323.74	3.1019	411.779	4.4202	317.53	3.0833	402.565	4.4206	307.52	3.1406
422.481	4.4196	338.12	3.1669	423.105	4.4198	349.88	3.1585	423.091	4.4198	339.01	3.1658	423.833	4.4199	324	3.1006	411.834	4.4201	317.62	3.0832	402.616	4.4207	307.61	3.1403
422.517	4.4196	338.47	3.1658	423.137	4.4198	349.97	3.1584	423.127	4.4196	339.36	3.1647	423.878	4.4199	324.18	3.0996	411.887	4.4201	317.88	3.0822	402.666	4.4207	307.87	3.1393
422.552	4.4198	338.56	3.1656	423.17	4.4198	350.23	3.1574	423.162	4.4198	339.45	3.1645	423.924	4.4199	324.44	3.0982	411.941	4.4201	318.05	3.0816	402.717	4.4207	308.05	3.1387
422.587	4.4196	338.91	3.1644	423.202	4.4198	350.4	3.1568	423.197	4.4198	339.8	3.1632	423.969	4.4199	324.62	3.0972	411.995	4.4202	318.32	3.0806	402.767	4.4207	308.4	3.1376
422.622	4.4196	338.99	3.164	423.234	4.4198	350.75	3.1556	423.231	4.4196	339.88	3.1631	424.015	4.4199	324.88	3.0959	412.048	4.4202	318.49	3.08	402.817	4.4207	308.48	3.1371
422.657	4.4196	339.43	3.1627	423.266	4.4198	350.84	3.1555	423.266	4.4198	340.15	3.1621	424.06	4.4199	325.05	3.095	412.101	4.4201	318.75	3.079	402.866	4.4207	308.83	3.136
422.692	4.4198	339.78	3.1616	423.298	4.4198	351.1	3.1545	423.3	4.4196	340.32	3.1615	424.104	4.4199	325.23	3.094	412.154	4.4201	318.93	3.0783	402.916	4.4206	308.92	3.1356
422.726	4.4198	339.87	3.1613	423.329	4.4198	351.28	3.1539	423.334	4.4196	340.67	3.1603	424.149	4.4199	325.49	3.0925	412.206	4.4201	319.28	3.0771	402.965	4.4207	309.18	3.1345
422.761	4.4196	340.22	3.1602	423.361	4.4198	351.63	3.1527	423.368	4.4196	340.76	3.16	424.193	4.4199	325.75	3.0913	412.259	4.4202	319.37	3.0767	403.014	4.4207	309.36	3.134
422.795	4.4196	340.31	3.1598	423.392	4.4199	351.72	3.1524	423.402	4.4198	341.02	3.159	424.237	4.4199	325.93	3.0903	412.311	4.4201	319.72	3.0754	403.062	4.4207	309.62	3.1329
422.829	4.4196	340.66	3.1587	423.424	4.4198	351.98	3.1514	423.436	4.4198	341.2	3.1585	424.281	4.4199	326.1	3.0893	412.363	4.4201	319.8	3.0751	403.111	4.4207	309.8	3.1324
422.863	4.4196	340.74	3.1584	423.455	4.4198	352.15	3.151	423.469	4.4198	341.55	3.1573	424.324	4.4199	326.37	3.0879	412.414	4.4201	320.07	3.0741	403.159	4.4207	310.06	3.1314
422.897	4.4196	341.09	3.1573	423.486	4.4198	352.42	3.15	423.503	4.4198	341.63	3.1571	424.368	4.4199	326.54	3.0869	412.466	4.4201	320.24	3.0735	403.207	4.4207	310.23	3.1308
422.931	4.4198	341.18	3.1569	423.517	4.4198	352.59	3.1494	423.536	4.4198	341.9	3.1561	424.411	4.4199	326.72	3.0859	412.517	4.4201	320.59	3.0722	403.255	4.4207	310.5	3.1298
422.964	4.4196	341.53	3.1558	423.547	4.4198	352.94	3.1482	423.569	4.4196	342.07	3.1556	424.454	4.4199	326.8	3.0854	412.568	4.4201	320.68	3.0719	403.303	4.4207	310.67	3.1292
422.998	4.4196	341.62	3.1555	423.578	4.4198	353.03	3.1479	423.602	4.4198	342.33	3.1545	424.497	4.4199	326.98	3.0843	412.619	4.4202	320.94	3.0709	403.35	4.4207	310.93	3.1282
423.031	4.4198	341.88	3.1545	423.608	4.4198	353.29	3.1469	423.635	4.4198	342.51	3.154	424.539	4.4199	327.15	3.0833	412.67	4.4201	321.12	3.0703	403.397	4.4207	311.11	3.1276
423.064	4.4198	342.06	3.154	423.638	4.4198	353.47	3.1463	423.668	4.4198	342.86	3.1527	424.582	4.4199	327.24	3.0829	412.72	4.4201	321.38	3.0693	403.444	4.4207	311.37	3.1266
423.097	4.4198	342.41	3.1529	423.668	4.4198	353.82	3.1452	423.7	4.4198	342.95	3.1526	424.624	4.4199	327.42	3.0819	412.77	4.4202	321.55	3.0687	403.491	4.4207	311.55	3.126
423.13	4.4196	342.49	3.1526	423.699	4.4198	353.9	3.1448	423.732	4.4198	343.21	3.1516	424.666	4.4201	327.59	3.0809	412.82	4.4201	321.82	3.0677	403.538	4.4207	311.81	3.125
423.163	4.4198	342.84	3.1514	423.728	4.4198	354.25	3.1435	423.764	4.4196	343.38	3.151	424.707	4.4199	327.68	3.0804	412.87	4.4201	321.99	3.067	403.584	4.4207	311.99	3.1243
423.195	4.4196	342.93	3.1511	423.758	4.4198	354.34	3.1432	423.796	4.4198	343.73	3.1497	424.749	4.4199	327.85	3.0793	412.92	4.4201	322.34	3.0656	403.63	4.4207	312.34	3.123
423.228	4.4196	343.28	3.15	423.788	4.4198	354.69	3.1421	423.828	4.4196	343.82	3.1494	424.79	4.4199	328.03	3.0783	412.969	4.4201	322.43	3.0653	403.676	4.4207	312.42	3.1227
423.26	4.4196	343.37	3.1497	423.817	4.4198	354.78	3.1416	423.86	4.4198	344.17	3.1482	424.831	4.4199	328.12	3.0779	413.018	4.4201	322.69	3.0643	403.722	4.4207	312.77	3.1214
423.292	4.4196	343.63	3.1487	423.847	4.4198	355.13	3.1405	423.892	4.4198	344.26	3.1479	424.872	4.4199	328.29	3.0767	413.067	4.4202	322.87	3.0637	403.767	4.4207	312.86	3.1211
423.324	4.4196	343.81	3.1482	423.876	4.4198	355.22	3.1402	423.923	4.4198	344.61	3.1466	424.913	4.4199	328.55	3.0753	413.116	4.4202	323.13	3.0627	403.812	4.4207	313.12	3.1201
423.356	4.4196	344.16	3.1469	423.905	4.4198	355.48	3.1392	423.955	4.4196	344.7	3.1464	424.953	4.4199	328.73	3.0741	413.164	4.4202	323.3	3.062	403.858	4.4207	313.3	3.1195
423.387	4.4196	344.24	3.1466	423.934	4.4198	355.65	3.1385	423.986	4.4198	345.05	3.1452	424.993	4.4201	328.99	3.0727	413.213	4.4202	323.56	3.0609	403.902	4.4207	313.56	3.1185
423.419	4.4196	344.59	3.1455	423.963	4.4198	356	3.1372	424.017	4.4196	345.13	3.1448	425.034	4.4201	329.17	3.0716	413.261	4.4202	323.74	3.0603	403.947	4.4207	313.74	3.1179
423.451	4.4198	344.68	3.1452	423.992	4.4198	356.09	3.1369	424.048	4.4198	345.48	3.1435	425.074	4.4201	329.34	3.0706	413.309	4.4202	324	3.0593	403.991	4.4207	314	3.1168
423.482	4.4196	345.03	3.144	424.021	4.4198	356.44	3.1356	424.079	4.4196	345.57	3.1432	425.113	4.4201	329.43	3.0701	413.357	4.4201	324.18	3.0585	404.036	4.4207	314.17	3.1161
423.513	4.4196	345.12	3.1437	424.049	4.4198	356.53	3.1353	424.11	4.4198	345.92	3.1419	425.153	4.4199	329.6	3.069	413.404	4.4202	324.44	3.0575	404.08	4.4207	314.44	3.1151
423.544	4.4196	345.38	3.1427	424.078	4.4198	356.79	3.1343	424.14	4.4198	346.01	3.1416	425.192	4.4201	329.78	3.068	413.452	4.4201	324.61	3.0569	404.124	4.4207	314.61	3.1145
423.575	4.4198	345.56	3.1421	424.106	4.4198	356.97	3.1337	424.171	4.4198	346.36	3.1405	425.231	4.4199	329.87	3.0674	413.499	4.4202	324.88	3.0559	404.168	4.4207	314.87	3.1135
423.606	4.4196	345.91	3.141	424.134	4.4198	357.23	3.1327	424.201	4.4198	346.44	3.1402	425.27	4.4199	330.04	3.0662	413.546	4.4201	325.05	3.0551	404.211	4.4207	315.05	3.1129
423.637	4.4196	345.99	3.1406	424.162	4.4198	357.4	3.1321	424.231	4.4196	346.71	3.1392	425.309	4.4199	330.22	3.0651	413.593	4.4201	325.31	3.0541	404.255	4.4207	315.31	3.1117
423.668	4.4196	346.34	3.1393	424.19	4.4198	357.67	3.1311	424.261	4.4196	346.88	3.1385	425.347	4.4201	330.3	3.0646	413.639	4.4201	325.49	3.0535	404.298	4.4207	315.49	3.1111
423.698	4.4198	346.43	3.1392	424.218	4.4198	357.84	3.1305	424.291	4.4196	347.23	3.1372	425.386	4.4199	330.48	3.0635	413.686	4.4202	325.75	3.0524	404.341	4.4207	315.75	3.1101
423.728	4.4196	346.69	3.1382	424.246	4.4198	358.1	3.1293	424.321	4.4198	347.32	3.1369	425.424	4.4199	330.65	3.0624	413.732	4.4202	325.93	3.0517	404.384	4.4207	315.92	3.1093
423.759	4.4198	346.87	3.1376	424.273	4.4198	358.28	3.1287	424.351	4.4196	347.67	3.1356	425.462	4.4199	330.74	3.0619	413.778	4.4201	326.19	3.0506	404.426	4.4207	316.27	3.108
423.789	4.4198	347.13	3.1366	424.301	4.4198	358.54	3.1277	424.38	4.4198	347.76	3.1353	425.5	4.4199	330.92	3.0608	413.824	4.4202	326.36	3.0499	404.468	4.4207	316.36	3.1079
423.819	4.4196	347.31	3.136	424.328	4.4199	358.72	3.1271	424.409	4.4196	348.02	3.1343	425.537	4.4199	331.09	3.0596	413.87	4.4201	326.63	3.0488	404.511	4.4207	316.62	3.1067
423.849	4.4198	347.57	3.135	424.355	4.4198	358.98	3.1261	424.439	4.4198	348.19	3.1337	425.575	4.4199	331.18	3.059	413.915	4.4202	326.8	3.0482	404.553	4.4207	316.8	3.1061
423.879	4.4198	347.74	3.1345	424.383	4.4198	359.15	3.1255	424.468	4.4196	348.46	3.1327	425.612	4.4199	331.35	3.0578	413.961	4.4201	327.06	3.047	404.595	4.4207	317.06	3.105
423.908	4.4198	348.01	3.1335	424.41	4.4198	359.42	3.1245	424.497	4.4198	348.63	3.1319	425.649	4.4199	331.62	3.0562	414.006	4.4201	327.24	3.0464	404.636	4.4207	317.24	3.1043
423.938	4.4196	348.18	3.1329	424.437	4.4198	359.59	3.1239	424.526	4.4198	348.98	3.1306	425.686	4.4199	331.79	3.0549	414.05	4.4202	327.5	3.0454	404.678	4.4207	317.5	3.1032
423.967	4.4198	348.44	3.1319	424.464	4.4198	359.85	3.1227	424.555	4.4196	349.07	3.1303	425.723	4.4199	331.97	3.0538	414.095	4.4201	327.68	3.0446	404.719	4.4207	317.67	3.1026
423.996	4.4198	348.62	3.1313	424.49	4.4198	360.03	3.1221	424.583	4.4198	349.42	3.1292	425.759	4.4199	332.05	3.0533	414.14	4.4201	327.94	3.0435	404.76	4.4207	317.94	3.1016
424.026	4.4196	348.88	3.1303	424.517	4.4198	360.29	3.1211	424.612	4.4196	349.51	3.1289	425.795	4.4199	332.23	3.0522	414.184	4.4202	328.11	3.0428	404.801	4.4207	318.11	3.1009
424.055	4.4196	349.05	3.1297	424.543	4.4199	360.47	3.1205	424.64	4.4196	349.77	3.1277	425.832	4.4199	332.4	3.0509	414.229	4.4201	328.38	3.0417	404.842	4.4207	318.46	3.0995
424.083	4.4196	349.4	3.1284	424.57	4.4198	360.73	3.1193	424.668	4.4198	349.94	3.1271	425.868	4.4199	332.49	3.0503	414.273	4.4201	328.55	3.0409	404.882	4.4207	318.55	3.0992
424.112	4.4196	349.49	3.1282	424.596	4.4198	360.9	3.1187	424.697	4.4196	350.21	3.1261	425.904	4.4199	332.67	3.0491	414.317	4.4201	328.81	3.0399	404.923	4.4207	318.81	3.0982
424.141	4.4196	349.75	3.1272	424.622	4.4198	361.17	3.1176	424.724	4.4196	350.38	3.1255	425.939	4.4199	332.84	3.048	414.36	4.4202	328.99	3.0391	404.963	4.4207	318.99	3.0975
424.169	4.4198	349.93	3.1266	424.648	4.4198	361.34	3.1169	424.752	4.4198	350.64	3.1245	425.975	4.4199	332.93	3.0474	414.404	4.4201	329.25	3.038	405.003	4.4207	319.25	3.0964
424.198	4.4196	350.19	3.1256	424.674	4.4198	361.6	3.1159	424.78	4.4198	350.82	3.1239	426.01	4.4199	333.1	3.0462	414.447	4.4201	329.43	3.0374	405.043	4.4207	319.42	3.0958
424.226	4.4196	350.37	3.125	424.7	4.4198	361.78	3.1151	424.808	4.4196	351.08	3.1227	426.045	4.4199	333.28	3.0449	414.49	4.4202	329.69	3.0362	405.082	4.4207	319.69	3.0948
424.255	4.4196	350.63	3.124	424.725	4.4198	362.13	3.1138	424.835	4.4198	351.26	3.1222	426.081	4.4199	333.37	3.0443	414.533	4.4201	329.86	3.0356	405.122	4.4207	319.86	3.094
424.283	4.4196	350.8	3.1234	424.751	4.4198	362.22	3.1135	424.862	4.4196	351.52	3.1211	426.115	4.4199	333.54	3.0432	414.576	4.4202	330.13	3.0344	405.161	4.4207	320.12	3.093
424.311	4.4196	351.07	3.1224	424.777	4.4198	362.48	3.1124	424.89	4.4196	351.69	3.1205	426.15	4.4199	333.72	3.0419	414.619	4.4202	330.3	3.0336	405.2	4.4207	320.3	3.0922
424.339	4.4198	351.24	3.1218	424.802	4.4198	362.65	3.1116	424.917	4.4198	351.96	3.1195	426.185	4.4199	333.8	3.0412	414.661	4.4202	330.56	3.0325	405.24	4.4207	320.65	3.0909
424.367	4.4198	351.5	3.1206	424.827	4.4198	362.92	3.1106	424.944	4.4198	352.13	3.1189	426.219	4.4199	333.98	3.0399	414.704	4.4202	330.74	3.0317	405.278	4.4207	320.74	3.0904
424.395	4.4198	351.68	3.1201	424.852	4.4198	363.09	3.11	424.971	4.4198	352.39	3.1177	426.253	4.4199	334.15	3.0388	414.746	4.4202	331	3.0307	405.317	4.4207	321.09	3.0892
424.422	4.4196	352.03	3.1189	424.877	4.4198	363.35	3.1088	424.998	4.4198	352.57	3.1171	426.288	4.4199	334.24	3.0382	414.788	4.4201	331.18	3.0299	405.356	4.4207	321.17	3.0887
424.45	4.4196	352.12	3.1185	424.902	4.4198	363.53	3.1082	425.025	4.4198	352.83	3.1161	426.322	4.4199	334.42	3.0369	414.829	4.4201	331.44	3.0288	405.394	4.4207	321.44	3.0877
424.477	4.4198	352.47	3.1172	424.927	4.4198	363.79	3.1071	425.051	4.4196	353.01	3.1155	426.355	4.4199	334.59	3.0356	414.871	4.4201	331.61	3.028	405.432	4.4207	321.61	3.0871
424.505	4.4198	352.55	3.1169	424.952	4.4198	363.96	3.1063	425.078	4.4196	353.27	3.1143	426.389	4.4199	334.68	3.0349	414.913	4.4202	331.88	3.0269	405.47	4.4207	321.87	3.0859
424.532	4.4196	352.82	3.1158	424.976	4.4198	364.23	3.1053	425.104	4.4196	353.44	3.1137	426.423	4.4199	334.85	3.0336	414.954	4.4202	332.05	3.0261	405.508	4.4207	322.05	3.0853
424.559	4.4198	352.99	3.1151	425.001	4.4198	364.4	3.1045	425.131	4.4198	353.71	3.1126	426.456	4.4199	335.03	3.0324	414.995	4.4201	332.31	3.0249	405.546	4.4207	322.31	3.0842
424.586	4.4198	353.34	3.1138	425.026	4.4198	364.66	3.1034	425.157	4.4198	353.88	3.1119	426.489	4.4199	335.12	3.0317	415.036	4.4201	332.49	3.0241	405.584	4.4209	322.49	3.0835
424.613	4.4196	353.43	3.1135	425.05	4.4198	364.84	3.1027	425.183	4.4198	354.14	3.1109	426.522	4.4199	335.29	3.0304	415.077	4.4201	332.75	3.023	405.621	4.4207	322.75	3.0824
424.639	4.4196	353.78	3.1122	425.074	4.4198	365.1	3.1016	425.209	4.4196	354.32	3.1101	426.555	4.4199	335.46	3.0291	415.118	4.4201	332.93	3.0222	405.658	4.4207	322.92	3.0817
424.666	4.4196	353.87	3.1119	425.098	4.4198	365.28	3.1008	425.235	4.4198	354.67	3.1088	426.588	4.4199	335.55	3.0283	415.158	4.4201	333.19	3.0211	405.696	4.4207	323.19	3.0806
424.693	4.4198	354.13	3.1108	425.122	4.4198	365.54	3.0996	425.261	4.4198	354.76	3.1084	426.621	4.4201	335.73	3.027	415.199	4.4202	333.36	3.0202	405.733	4.4207	323.36	3.0798
424.719	4.4196	354.3	3.1101	425.146	4.4198	365.71	3.0988	425.287	4.4198	355.02	3.1074	426.653	4.4199	335.9	3.0257	415.239	4.4201	333.63	3.0191	405.769	4.4207	323.62	3.0788
424.746	4.4196	354.65	3.1088	425.17	4.4198	365.98	3.0977	425.312	4.4196	355.19	3.1066	426.685	4.4199	335.99	3.0251	415.279	4.4201	333.8	3.0183	405.806	4.4206	323.8	3.0782
424.772	4.4198	354.74	3.1085	425.194	4.4198	366.15	3.0971	425.338	4.4196	355.46	3.1056	426.718	4.4199	336.16	3.0236	415.319	4.4201	334.06	3.0172	405.843	4.4207	324.06	3.0771
424.798	4.4198	355	3.1074	425.218	4.4198	366.41	3.0958	425.363	4.4198	355.63	3.1048	426.75	4.4199	336.34	3.0223	415.358	4.4201	334.24	3.0164	405.879	4.4207	324.24	3.0762
424.824	4.4196	355.18	3.1067	425.241	4.4198	366.59	3.0951	425.388	4.4196	355.89	3.1038	426.782	4.4199	336.43	3.0215	415.398	4.4202	334.5	3.0151	405.915	4.4207	324.5	3.0751
424.85	4.4196	355.44	3.1056	425.265	4.4198	366.85	3.094	425.413	4.4198	356.07	3.103	426.813	4.4199	336.6	3.0202	415.438	4.4202	334.68	3.0144	405.952	4.4207	324.67	3.0745
424.876	4.4196	355.62	3.105	425.288	4.4198	367.03	3.0932	425.438	4.4198	356.42	3.1016	426.845	4.4199	336.78	3.0188	415.477	4.4202	334.94	3.0131	405.988	4.4207	324.94	3.0733
424.902	4.4196	355.88	3.104	425.311	4.4198	367.29	3.0921	425.463	4.4198	356.51	3.1013	426.877	4.4199	336.86	3.0181	415.516	4.4201	335.11	3.0123	406.023	4.4207	325.11	3.0725
424.927	4.4198	356.05	3.1032	425.334	4.4198	367.46	3.0913	425.488	4.4198	356.77	3.1003	426.908	4.4199	337.04	3.0167	415.555	4.4201	335.38	3.0112	406.059	4.4207	325.46	3.0711
424.953	4.4196	356.32	3.1022	425.358	4.4198	367.73	3.0901	425.513	4.4198	356.94	3.0995	426.939	4.4199	337.21	3.0152	415.594	4.4201	335.55	3.0104	406.094	4.4207	325.55	3.0708
424.978	4.4196	356.49	3.1014	425.381	4.4198	367.9	3.0893	425.538	4.4198	357.21	3.0984	426.97	4.4199	337.3	3.0146	415.633	4.4201	335.81	3.0091	406.13	4.4207	325.81	3.0696
425.004	4.4198	356.84	3.1001	425.404	4.4198	368.16	3.088	425.562	4.4196	357.38	3.0977	427.001	4.4199	337.48	3.0131	415.672	4.4201	335.99	3.0083	406.165	4.4207	325.99	3.0688
425.029	4.4196	356.93	3.0998	425.427	4.4198	368.34	3.0874	425.586	4.4198	357.64	3.0966	427.032	4.4199	337.65	3.0117	415.71	4.4202	336.25	3.0072	406.2	4.4207	326.34	3.0674
425.054	4.4196	357.19	3.0987	425.45	4.4198	368.6	3.0861	425.611	4.4198	357.82	3.0958	427.063	4.4199	337.74	3.011	415.748	4.4202	336.43	3.0062	406.235	4.4207	326.42	3.067
425.079	4.4196	357.37	3.098	425.472	4.4198	368.78	3.0854	425.635	4.4198	358.08	3.0946	427.093	4.4199	337.91	3.0094	415.787	4.4202	336.69	3.0051	406.27	4.4207	326.69	3.0659
425.104	4.4196	357.63	3.0969	425.495	4.4198	369.04	3.0842	425.659	4.4198	358.26	3.094	427.123	4.4199	338.09	3.008	415.825	4.4202	336.86	3.0043	406.305	4.4207	326.86	3.0653
425.129	4.4198	357.8	3.0963	425.518	4.4198	369.21	3.0833	425.683	4.4198	358.52	3.0929	427.154	4.4199	338.18	3.0073	415.863	4.4201	337.04	3.0033	406.339	4.4207	327.12	3.0641
425.154	4.4198	358.07	3.0951	425.54	4.4199	369.48	3.0821	425.707	4.4198	358.69	3.0921	427.184	4.4199	338.35	3.0057	415.9	4.4201	337.3	3.0022	406.374	4.4206	327.3	3.0633
425.179	4.4198	358.24	3.0943	425.562	4.4198	369.65	3.0812	425.731	4.4196	358.96	3.0909	427.214	4.4199	338.53	3.0043	415.938	4.4202	337.48	3.0012	406.408	4.4207	327.56	3.0622
425.203	4.4196	358.59	3.093	425.585	4.4198	369.91	3.0801	425.754	4.4196	359.13	3.0903	427.244	4.4199	338.61	3.0035	415.975	4.4202	337.74	3.0001	406.442	4.4207	327.74	3.0614
425.228	4.4198	358.68	3.0927	425.607	4.4199	370.09	3.0793	425.778	4.4198	359.39	3.0892	427.274	4.4199	338.79	3.002	416.013	4.4201	337.83	2.9996	406.476	4.4207	328	3.0604
425.252	4.4196	358.94	3.0916	425.629	4.4198	370.35	3.078	425.801	4.4198	359.57	3.0884	427.303	4.4199	338.96	3.0004	416.05	4.4201	337.82	3.0007	406.51	4.4207	328.17	3.0596
425.277	4.4198	359.12	3.0908	425.651	4.4198	370.53	3.0772	425.825	4.4198	359.83	3.0872	427.333	4.4199	339.05	2.9998	416.087	4.4201	337.91	3.0007	406.544	4.4207	328.44	3.0585
425.301	4.4196	359.38	3.0896	425.673	4.4199	370.79	3.0759	425.848	4.4196	360.01	3.0864	427.362	4.4199	339.05	3.0012	416.124	4.4202	338.25	3.0001	406.577	4.4207	328.61	3.0577
425.325	4.4198	359.55	3.089	425.695	4.4198	370.96	3.0751	425.872	4.4198	360.27	3.0853	427.392	4.4199	339.14	3.0012	416.161	4.4202	338.69	3.0001	406.611	4.4207	328.87	3.0566
425.349	4.4198	359.81	3.0879	425.717	4.4198	371.23	3.0738	425.895	4.4196	360.44	3.0845	427.421	4.4201	339.22	3.0001	416.197	4.4202	339.12	3.0002	406.644	4.4207	329.05	3.0558
425.373	4.4196	359.99	3.0871	425.738	4.4198	371.4	3.073	425.918	4.4196	360.71	3.0833	427.45	4.4199	339.48	2.9999	416.234	4.4201	339.54	3.0001	406.678	4.4207	329.31	3.0546
425.397	4.4196	360.25	3.0859	425.76	4.4198	371.66	3.0717	425.941	4.4198	360.88	3.0825	427.479	4.4199	339.91	2.9999	416.27	4.4201	339.96	3.0001	406.711	4.4207	329.49	3.054
425.421	4.4198	360.43	3.0853	425.781	4.4198	371.84	3.0709	425.964	4.4198	361.14	3.0814	427.507	4.4199	340.34	2.9999	416.306	4.4201	340.39	3.0001	406.744	4.4207	329.75	3.0527
425.445	4.4196	360.69	3.0842	425.803	4.4198	372.1	3.0696	425.987	4.4198	361.32	3.0806	427.536	4.4199	340.76	2.9999	416.342	4.4202	340.81	3.0001	406.777	4.4207	329.92	3.052
425.468	4.4198	360.86	3.0833	425.824	4.4198	372.28	3.0687	426.009	4.4198	361.58	3.0795	427.565	4.4199	341.18	3.0001	416.378	4.4201	341.22	3.0001	406.81	4.4207	330.19	3.0507
425.492	4.4196	361.13	3.0822	425.846	4.4198	372.54	3.0674	426.032	4.4198	361.76	3.0787	427.593	4.4199	341.59	3.0001	416.414	4.4201	341.64	3.0001	406.842	4.4207	330.36	3.0501
425.515	4.4196	361.3	3.0816	425.867	4.4198	372.71	3.0666	426.055	4.4198	362.02	3.0775	427.621	4.4199	342.01	2.9999	416.45	4.4201	342.05	3.0001	406.875	4.4207	330.62	3.049
425.538	4.4196	361.56	3.0803	425.888	4.4198	372.98	3.0653	426.077	4.4196	362.19	3.0767	427.65	4.4199	342.42	2.9999	416.485	4.4201	342.46	3.0001	406.907	4.4209	330.8	3.0482
425.561	4.4196	361.74	3.0796	425.909	4.4198	373.15	3.0643	426.1	4.4196	362.45	3.0754	427.678	4.4199	342.82	2.9999	416.521	4.4202	342.87	3.0001	406.939	4.4207	331.06	3.047
425.584	4.4196	362	3.0785	425.93	4.4198	373.41	3.063	426.122	4.4198	362.63	3.0746	427.706	4.4199	343.23	2.9999	416.556	4.4202	343.27	3.0001	406.971	4.4207	331.24	3.0462
425.607	4.4196	362.18	3.0777	425.951	4.4198	373.59	3.0622	426.144	4.4198	362.89	3.0735	427.733	4.4199	343.63	2.9999	416.591	4.4202	343.68	3.0001	407.003	4.4207	331.5	3.0449
425.63	4.4196	362.44	3.0766	425.972	4.4198	373.76	3.0612	426.166	4.4196	363.07	3.0727	427.761	4.4199	344.03	3.0001	416.626	4.4202	344.08	3.0001	407.035	4.4207	331.68	3.0441
425.653	4.4196	362.61	3.0758	425.993	4.4198	374.03	3.0599	426.188	4.4198	363.33	3.0714	427.789	4.4201	344.42	2.9999	416.661	4.4201	344.48	3.0001	407.067	4.4207	332.03	3.0427
425.676	4.4196	362.88	3.0745	426.013	4.4198	374.29	3.0587	426.21	4.4198	363.5	3.0706	427.816	4.4199	344.82	2.9999	416.696	4.4202	344.87	3.0001	407.098	4.4207	332.11	3.0422
425.698	4.4196	363.05	3.0737	426.034	4.4198	374.46	3.0577	426.232	4.4198	363.77	3.0695	427.844	4.4199	345.21	2.9999	416.731	4.4202	345.27	3.0001	407.13	4.4207	332.38	3.0411
425.721	4.4196	363.31	3.0725	426.054	4.4198	374.64	3.0567	426.254	4.4198	363.94	3.0685	427.871	4.4201	345.6	2.9999	416.765	4.4201	345.66	3.0001	407.161	4.4207	332.55	3.0403
425.744	4.4196	363.49	3.0719	426.075	4.4198	374.9	3.0553	426.276	4.4198	364.2	3.0674	427.898	4.4199	345.98	2.9999	416.8	4.4202	346.05	3.0001	407.192	4.4207	332.81	3.0391
425.766	4.4196	363.75	3.0706	426.095	4.4198	375.16	3.054	426.298	4.4198	364.38	3.0666	427.925	4.4199	346.36	2.9999	416.834	4.4201	346.44	3.0001	407.224	4.4207	332.99	3.0383
425.789	4.4196	363.93	3.0698	426.115	4.4198	375.34	3.053	426.319	4.4198	364.64	3.0653	427.952	4.4199	346.74	2.9999	416.868	4.4201	346.83	3.0001	407.255	4.4207	333.25	3.0372
425.811	4.4196	364.19	3.0687	426.135	4.4198	375.51	3.052	426.341	4.4196	364.82	3.0645	427.979	4.4199	347.12	2.9999	416.902	4.4202	347.21	3.0001	407.286	4.4207	333.43	3.0362
425.834	4.4196	364.36	3.0679	426.156	4.4198	375.78	3.0506	426.362	4.4196	364.99	3.0635	428.006	4.4201	347.49	3.0001	416.936	4.4202	347.59	3.0001	407.316	4.4207	333.69	3.0351
425.856	4.4196	364.63	3.0666	426.176	4.4198	376.04	3.0491	426.383	4.4198	365.25	3.0624	428.032	4.4199	347.87	2.9999	416.97	4.4202	347.97	3.0001	407.347	4.4207	333.86	3.0343
425.878	4.4198	364.8	3.0659	426.196	4.4198	376.21	3.0483	426.404	4.4198	365.43	3.0614	428.059	4.4199	348.24	2.9999	417.003	4.4202	348.35	3.0001	407.378	4.4207	334.13	3.0332
425.9	4.4196	364.98	3.0649	426.216	4.4198	376.48	3.0469	426.425	4.4198	365.69	3.0601	428.085	4.4199	348.6	3.0001	417.037	4.4201	348.73	3.0001	407.408	4.4207	334.3	3.0322
425.922	4.4198	365.24	3.0638	426.235	4.4198	376.65	3.0459	426.447	4.4196	365.95	3.059	428.111	4.4199	348.97	2.9999	417.07	4.4201	349.1	3.0001	407.438	4.4207	334.56	3.0311
425.944	4.4196	365.5	3.0625	426.255	4.4198	376.83	3.0449	426.468	4.4198	366.13	3.058	428.138	4.4199	349.33	2.9999	417.103	4.4201	349.47	3.0002	407.469	4.4207	334.74	3.0303
425.966	4.4198	365.68	3.0617	426.275	4.4198	377.09	3.0435	426.488	4.4196	366.39	3.0567	428.164	4.4199	349.69	2.9999	417.137	4.4201	349.84	3.0001	407.499	4.4207	335	3.0291
425.988	4.4196	365.94	3.0606	426.294	4.4198	377.26	3.0425	426.509	4.4198	366.57	3.0559	428.19	4.4199	350.05	2.9999	417.17	4.4202	350.21	3.0001	407.529	4.4207	335.18	3.0282
426.01	4.4196	366.11	3.0596	426.313	4.4198	377.44	3.0415	426.53	4.4198	366.83	3.0546	428.216	4.4199	350.4	2.9999	417.203	4.4201	350.58	3.0001	407.559	4.4207	335.44	3.027
426.031	4.4196	366.38	3.0585	426.333	4.4198	377.53	3.0409	426.551	4.4196	367	3.0538	428.241	4.4199	350.75	2.9999	417.236	4.4202	350.94	3.0001	407.589	4.4207	335.61	3.0262
426.053	4.4196	366.55	3.0575	426.352	4.4198	377.7	3.0399	426.571	4.4198	367.18	3.0528	428.267	4.4199	351.1	2.9999	417.268	4.4201	351.3	3.0001	407.618	4.4207	335.88	3.0249
426.074	4.4196	366.81	3.0564	426.372	4.4198	377.96	3.0385	426.591	4.4198	367.44	3.0514	428.293	4.4199	351.45	3.0001	417.301	4.4201	351.67	3.0001	407.648	4.4207	336.05	3.0241
426.096	4.4196	366.99	3.0556	426.391	4.4198	378.14	3.0374	426.612	4.4198	367.7	3.0501	428.318	4.4199	351.8	2.9999	417.333	4.4201	352.02	3.0001	407.678	4.4207	336.31	3.023
426.117	4.4198	367.16	3.0546	426.41	4.4196	378.31	3.0364	426.632	4.4198	367.88	3.0493	428.344	4.4199	352.14	3.0001	417.366	4.4202	352.38	3.0001	407.707	4.4207	336.49	3.022
426.138	4.4196	367.43	3.0533	426.429	4.4198	378.4	3.0359	426.653	4.4198	368.05	3.0483	428.369	4.4199	352.48	2.9999	417.398	4.4201	352.73	2.9999	407.736	4.4207	336.75	3.0207
426.159	4.4196	367.69	3.052	426.448	4.4198	378.58	3.0349	426.673	4.4198	368.32	3.047	428.394	4.4199	352.82	2.9999	417.43	4.4201	353.09	3.0001	407.765	4.4207	336.93	3.0199
426.181	4.4198	367.86	3.0512	426.467	4.4198	378.75	3.0338	426.693	4.4198	368.58	3.0456	428.419	4.4199	353.16	2.9999	417.462	4.4202	353.44	3.0001	407.794	4.4207	337.19	3.0188
426.202	4.4196	368.13	3.0499	426.486	4.4198	378.84	3.0333	426.713	4.4198	368.75	3.0448	428.444	4.4199	353.49	2.9999	417.495	4.4202	353.79	3.0001	407.823	4.4207	337.36	3.0178
426.223	4.4196	368.3	3.049	426.505	4.4198	379.01	3.0322	426.733	4.4198	368.93	3.0438	428.469	4.4199	353.82	2.9999	417.526	4.4201	354.13	3.0001	407.852	4.4207	337.63	3.0167
426.244	4.4198	368.56	3.0477	426.523	4.4196	379.19	3.0312	426.753	4.4198	369.1	3.0428	428.494	4.4199	354.15	2.9999	417.558	4.4201	354.48	3.0001	407.881	4.4207	337.8	3.0159
426.265	4.4196	368.74	3.0469	426.542	4.4198	379.28	3.0307	426.773	4.4198	369.19	3.0424	428.519	4.4199	354.48	2.9999	417.59	4.4201	354.82	3.0001	407.91	4.4207	337.98	3.0149
426.286	4.4198	368.91	3.0459	426.561	4.4198	379.45	3.0296	426.792	4.4198	369.45	3.0411	428.543	4.4199	354.81	2.9999	417.621	4.4202	355.16	3.0001	407.938	4.4207	338.24	3.0138
426.306	4.4196	369.17	3.0446	426.579	4.4198	379.63	3.0286	426.812	4.4198	369.63	3.0401	428.567	4.4199	355.13	2.9999	417.653	4.4201	355.5	3.0002	407.967	4.4207	338.41	3.0128
426.327	4.4198	369.35	3.0436	426.598	4.4198	379.71	3.0282	426.831	4.4196	369.89	3.0386	428.592	4.4199	355.45	2.9999	417.684	4.4201	355.84	3.0001	407.995	4.4207	338.68	3.0115
426.347	4.4196	369.61	3.0424	426.616	4.4198	379.89	3.027	426.851	4.4196	370.07	3.0378	428.616	4.4201	355.77	2.9999	417.715	4.4201	356.18	3.0001	408.023	4.4207	338.94	3.0104
426.368	4.4198	369.87	3.0411	426.635	4.4198	380.06	3.0259	426.87	4.4198	370.33	3.0364	428.64	4.4199	356.09	2.9999	417.746	4.4201	356.51	3.0001	408.051	4.4207	339.11	3.0096
426.388	4.4196	370.05	3.0401	426.653	4.4198	380.15	3.0254	426.889	4.4198	370.5	3.0354	428.664	4.4199	356.41	2.9999	417.777	4.4201	356.84	3.0001	408.079	4.4207	339.29	3.0086
426.409	4.4196	370.31	3.0386	426.671	4.4198	380.33	3.0243	426.909	4.4198	370.68	3.0344	428.688	4.4201	356.72	2.9999	417.808	4.4202	357.17	3.0001	408.107	4.4207	339.55	3.0073
426.429	4.4198	370.49	3.0378	426.689	4.4198	380.5	3.0233	426.928	4.4198	370.94	3.033	428.712	4.4199	357.03	2.9999	417.839	4.4202	357.5	3.0001	408.135	4.4207	339.81	3.006
426.449	4.4196	370.75	3.0364	426.707	4.4198	380.59	3.0227	426.947	4.4196	371.12	3.032	428.736	4.4199	357.34	2.9999	417.87	4.4202	357.83	3.0001	408.163	4.4207	339.99	3.0052
426.469	4.4198	370.92	3.0356	426.725	4.4198	380.76	3.0217	426.966	4.4196	371.38	3.0306	428.76	4.4199	357.65	2.9999	417.9	4.4201	358.15	3.0001	408.19	4.4207	340.25	3.0039
426.49	4.4198	371.1	3.0346	426.743	4.4198	380.94	3.0206	426.985	4.4198	371.55	3.0296	428.784	4.4199	357.95	2.9999	417.931	4.4201	358.48	3.0001	408.218	4.4207	340.43	3.003
426.509	4.4196	371.27	3.0336	426.761	4.4198	381.03	3.0199	427.003	4.4196	371.73	3.0286	428.808	4.4199	358.26	2.9999	417.961	4.4202	358.8	3.0001	408.246	4.4207	340.69	3.0017
426.529	4.4196	371.36	3.0332	426.779	4.4198	381.29	3.0183	427.022	4.4196	371.82	3.0282	428.831	4.4199	358.56	3.0001	417.991	4.4202	359.12	3.0001	408.273	4.4207	340.86	3.0007
426.549	4.4196	371.62	3.0319	426.797	4.4198	381.46	3.0172	427.041	4.4198	371.99	3.0272	428.854	4.4199	358.86	2.9999	418.021	4.4201	359.44	3.0001	408.3	4.4207	341.04	2.9999
426.569	4.4198	371.8	3.0309	426.815	4.4198	381.64	3.0161	427.059	4.4198	372.17	3.0262	428.878	4.4199	359.16	2.9999	418.051	4.4202	359.76	3.0001	408.328	4.4207	341.04	3.0009
426.588	4.4196	371.97	3.0299	426.833	4.4198	381.81	3.0149	427.078	4.4196	372.25	3.0257	428.901	4.4199	359.45	2.9999	418.081	4.4202	360.07	3.0001	408.355	4.4207	341.13	3.0009
426.608	4.4196	372.24	3.0285	426.85	4.4198	381.9	3.0143	427.097	4.4198	372.52	3.0241	428.924	4.4199	359.75	3.0001	418.111	4.4202	360.38	3.0001	408.382	4.4207	341.47	3.0004
426.627	4.4196	372.41	3.0275	426.868	4.4198	382.08	3.0133	427.115	4.4198	372.69	3.0232	428.947	4.4199	360.04	2.9999	418.141	4.4201	360.7	3.0001	408.409	4.4207	341.9	3.0006
426.647	4.4196	372.59	3.0265	426.885	4.4198	382.25	3.012	427.134	4.4198	372.87	3.0222	428.97	4.4199	360.33	2.9999	418.171	4.4202	361.01	3.0001	408.435	4.4207	342.33	3.0004
426.666	4.4198	372.67	3.0261	426.903	4.4199	382.34	3.0114	427.152	4.4198	373.04	3.0211	428.993	4.4199	360.62	2.9999	418.2	4.4201	361.31	3.0001	408.462	4.4207	342.75	3.0006
426.685	4.4196	372.85	3.0251	426.92	4.4198	382.51	3.0104	427.171	4.4196	373.13	3.0207	429.015	4.4199	360.91	2.9999	418.23	4.4201	361.62	3.0001	408.489	4.4207	343.17	3.0004
426.705	4.4196	373.02	3.0241	426.937	4.4196	382.69	3.0091	427.189	4.4196	373.3	3.0196	429.038	4.4199	361.19	3.0001	418.259	4.4202	361.93	3.0001	408.515	4.4207	343.59	3.0004
426.724	4.4198	373.11	3.0236	426.954	4.4198	382.78	3.0085	427.207	4.4196	373.48	3.0186	429.06	4.4199	361.48	2.9999	418.288	4.4201	362.23	3.0001	408.542	4.4207	344	3.0004
426.743	4.4196	373.37	3.0222	426.971	4.4198	382.95	3.0073	427.225	4.4196	373.57	3.0181	429.083	4.4199	361.76	3.0001	418.317	4.4201	362.53	3.0001	408.568	4.4207	344.41	3.0004
426.762	4.4198	373.55	3.0211	426.989	4.4198	383.13	3.0062	427.243	4.4198	373.74	3.017	429.105	4.4199	362.04	2.9999	418.346	4.4201	362.83	3.0001	408.594	4.4207	344.82	3.0004
426.782	4.4196	373.81	3.0196	427.006	4.4198	383.21	3.0056	427.261	4.4196	374	3.0154	429.128	4.4199	362.32	2.9999	418.375	4.4202	363.13	3.0001	408.62	4.4207	345.22	3.0006
426.801	4.4196	373.99	3.0186	427.023	4.4198	383.39	3.0043	427.279	4.4198	374.18	3.0144	429.15	4.4199	362.59	3.0001	418.404	4.4202	363.43	3.0001	408.647	4.4207	345.63	3.0004
426.82	4.4198	374.25	3.0172	427.039	4.4198	383.56	3.0031	427.297	4.4198	374.44	3.0128	429.172	4.4199	362.87	2.9999	418.432	4.4202	363.72	3.0001	408.673	4.4207	346.03	3.0004
426.839	4.4196	374.42	3.0162	427.056	4.4198	383.65	3.0025	427.315	4.4198	374.7	3.0112	429.194	4.4199	363.14	2.9999	418.461	4.4202	364.02	3.0001	408.698	4.4207	346.42	3.0004
426.857	4.4196	374.6	3.0152	427.073	4.4196	383.83	3.0012	427.333	4.4198	374.88	3.0102	429.216	4.4199	363.42	2.9999	418.49	4.4201	364.31	3.0001	408.724	4.4207	346.82	3.0004
426.876	4.4196	374.77	3.0141	427.09	4.4198	384	3.0001	427.35	4.4198	375.14	3.0086	429.238	4.4199	363.69	2.9999	418.518	4.4202	364.6	3.0001	408.75	4.4207	347.21	3.0004
426.895	4.4198	374.86	3.0136	427.106	4.4198	384.09	2.9994	427.368	4.4198	375.32	3.0075	429.26	4.4199	363.95	3.0001	418.546	4.4201	364.89	3.0001	408.775	4.4207	347.6	3.0004
426.914	4.4198	375.12	3.012	427.123	4.4198	384.09	3.0007	427.385	4.4198	375.49	3.0065	429.281	4.4199	364.22	2.9999	418.575	4.4201	365.18	3.0001	408.801	4.4207	347.98	3.0004
426.932	4.4196	375.3	3.011	427.14	4.4199	384.18	3.0007	427.403	4.4198	375.67	3.0054	429.303	4.4199	364.49	2.9999	418.603	4.4201	365.46	3.0001	408.826	4.4207	348.37	3.0004
426.951	4.4196	375.56	3.0094	427.156	4.4198	384.52	3.0001	427.42	4.4198	375.75	3.0048	429.324	4.4199	364.75	2.9999	418.63	4.4201	365.75	3.0001	408.852	4.4207	348.75	3.0006
426.969	4.4198	375.74	3.0085	427.173	4.4198	384.95	2.9999	427.438	4.4198	375.93	3.0036	429.346	4.4199	365.02	2.9999	418.658	4.4201	366.03	3.0001	408.877	4.4207	349.13	3.0004
426.988	4.4196	375.91	3.0073	427.189	4.4198	385.37	2.9999	427.455	4.4198	376.19	3.002	429.367	4.4199	365.28	2.9999	418.686	4.4201	366.31	3.0001	408.902	4.4207	349.5	3.0004
427.006	4.4196	376.17	3.0057	427.206	4.4198	385.79	2.9999	427.472	4.4196	376.37	3.0009	429.389	4.4199	365.54	2.9999	418.714	4.4202	366.59	3.0001	408.927	4.4207	349.88	3.0004
427.024	4.4198	376.44	3.0043	427.222	4.4198	386.21	2.9999	427.489	4.4198	376.54	2.9999	429.41	4.4199	365.79	2.9999	418.742	4.4202	366.87	3.0001	408.952	4.4207	350.25	3.0004
427.042	4.4196	376.61	3.0031	427.238	4.4198	386.62	2.9998	427.506	4.4198	376.54	3.0012	429.432	4.4199	366.05	2.9999	418.769	4.4202	367.15	3.0001	408.978	4.4207	350.62	3.0004
427.061	4.4196	376.79	3.002	427.255	4.4198	387.02	2.9999	427.524	4.4198	376.63	3.0012	429.453	4.4199	366.31	3.0001	418.797	4.4202	367.42	3.0001	409.002	4.4207	350.98	3.0004
427.079	4.4198	376.96	3.0009	427.271	4.4198	387.43	2.9998	427.541	4.4196	376.71	2.9998	429.474	4.4201	366.56	3.0001	418.824	4.4202	367.7	3.0001	409.027	4.4207	351.35	3.0004
427.097	4.4196	377.05	3.0004	427.287	4.4198	387.83	2.9999	427.557	4.4196	376.97	2.9998	429.495	4.4199	366.81	2.9999	418.851	4.4201	367.97	3.0001	409.052	4.4207	351.71	3.0006
427.115	4.4198	377.14	2.9998	427.303	4.4198	388.22	2.9999	427.574	4.4198	377.4	2.9998	429.516	4.4199	367.06	3.0001	418.879	4.4202	368.24	3.0001	409.076	4.4207	352.07	3.0004
427.133	4.4196	377.14	3.0012	427.319	4.4198	388.61	2.9999	427.591	4.4198	377.83	2.9998	429.537	4.4201	367.31	3.0001	418.906	4.4202	368.51	3.0001	409.101	4.4207	352.43	3.0004
427.151	4.4198	377.23	3.0012	427.335	4.4198	389	2.9999	427.608	4.4198	378.25	2.9998	429.558	4.4199	367.56	2.9999	418.933	4.4202	368.78	3.0001	409.125	4.4207	352.78	3.0004
427.169	4.4196	377.31	2.9998	427.351	4.4198	389.39	2.9999	427.624	4.4196	378.67	2.9998	429.579	4.4199	367.81	3.0001	418.96	4.4202	369.05	3.0001	409.15	4.4207	353.13	3.0006
427.187	4.4196	377.57	2.9998	427.367	4.4198	389.77	2.9999	427.641	4.4196	379.08	2.9998	429.599	4.4199	368.06	2.9999	418.987	4.4202	369.32	3.0001	409.174	4.4207	353.48	3.0004
427.204	4.4198	378	2.9998	427.383	4.4198	390.15	2.9999	427.658	4.4198	379.49	2.9998	429.62	4.4199	368.3	2.9999	419.014	4.4202	369.58	3.0001	409.198	4.4207	353.83	3.0004
427.222	4.4198	378.43	2.9996	427.399	4.4198	390.52	2.9999	427.674	4.4196	379.9	2.9998	429.64	4.4201	368.54	2.9999	419.041	4.4201	369.84	3.0001	409.222	4.4207	354.17	3.0006
427.24	4.4198	378.85	2.9998	427.402	4.4198	390.89	2.9999	427.691	4.4198	380.31	2.9998	429.661	4.4199	368.78	2.9999	419.067	4.4201	370.1	2.9999	409.246	4.4207	354.52	3.0004
427.257	4.4198	379.27	2.9998			391.26	2.9999	427.707	4.4198	380.71	2.9998	429.681	4.4199	369.02	2.9999	419.094	4.4202	370.37	3.0001	409.27	4.4207	354.86	3.0004
427.275	4.4196	379.68	2.9998			391.62	2.9999	427.724	4.4198	381.1	2.9998	429.701	4.4199	369.26	2.9999	419.12	4.4201	370.62	3.0001	409.294	4.4207	355.2	3.0006
427.292	4.4198	380.09	2.9998			391.99	2.9999	427.74	4.4198	381.5	2.9998	429.721	4.4199	369.5	2.9999	419.146	4.4201	370.88	3.0001	409.318	4.4207	355.53	3.0006
427.31	4.4198	380.5	2.9996			392.34	2.9999	427.756	4.4198	381.89	2.9998	429.742	4.4199	369.74	2.9999	419.173	4.4202	371.14	3.0001	409.342	4.4207	355.87	3.0004
427.327	4.4196	380.9	2.9998			392.7	2.9998	427.772	4.4198	382.28	2.9998	429.762	4.4199	369.97	2.9999	419.199	4.4202	371.39	3.0001	409.365	4.4207	356.2	3.0004
427.344	4.4198	381.3	2.9998			393.05	2.9999	427.788	4.4198	382.66	2.9998	429.782	4.4199	370.21	2.9999	419.225	4.4202	371.65	3.0001	409.389	4.4207	356.53	3.0004
427.361	4.4196	381.7	2.9996			393.4	2.9999	427.805	4.4198	383.05	2.9998	429.802	4.4199	370.44	2.9999	419.251	4.4202	371.9	3.0001	409.412	4.4207	356.85	3.0004
427.378	4.4198	382.09	2.9996			393.74	2.9999	427.82	4.4198	383.43	2.9996	429.821	4.4199	370.67	3.0001	419.277	4.4202	372.15	3.0001	409.436	4.4207	357.18	3.0006
427.396	4.4196	382.49	2.9996			394.08	2.9999	427.837	4.4196	383.8	2.9998	429.841	4.4199	370.9	2.9999	419.303	4.4201	372.4	3.0001	409.459	4.4207	357.5	3.0004
427.413	4.4198	382.87	2.9996			394.42	2.9999	427.853	4.4198	384.17	2.9998	429.861	4.4199	371.13	3.0001	419.329	4.4202	372.65	3.0001	409.482	4.4206	357.82	3.0004
427.43	4.4196	383.26	2.9998			394.76	2.9999	427.868	4.4198	384.54	2.9998	429.881	4.4199	371.36	2.9999	419.354	4.4201	372.89	3.0001	409.506	4.4207	358.14	3.0006
427.446	4.4198	383.64	2.9996			395.09	2.9999	427.884	4.4196	384.91	2.9998	429.9	4.4199	371.59	2.9999	419.38	4.4202	373.14	3.0001	409.529	4.4207	358.46	3.0004
427.463	4.4196	384.02	2.9998			395.42	2.9998	427.9	4.4196	385.28	2.9998	429.92	4.4199	371.81	2.9999	419.406	4.4202	373.38	3.0001	409.552	4.4207	358.78	3.0006
427.48	4.4198	384.39	2.9996			395.74	2.9999	427.916	4.4198	385.64	2.9998	429.939	4.4201	372.04	3.0001	419.431	4.4202	373.63	3.0001	409.575	4.4207	359.09	3.0006
427.497	4.4196	384.76	2.9996			396.06	2.9998	427.919	4.4198	386	2.9998	429.958	4.4201	372.26	2.9999	419.457	4.4202	373.87	3.0001	409.598	4.4207	359.4	3.0006
427.514	4.4196	385.13	2.9998			396.38	2.9999			386.35	2.9998	429.978	4.4199	372.48	2.9999	419.482	4.4202	374.11	3.0001	409.62	4.4207	359.71	3.0006
427.53	4.4198	385.5	2.9996			396.7	2.9999			386.71	2.9998	429.997	4.4201	372.7	2.9999	419.507	4.4201	374.35	3.0001	409.643	4.4207	360.01	3.0004
427.547	4.4196	385.86	2.9996			397.01	2.9999			387.06	2.9998	430.016	4.4199	372.92	2.9999	419.533	4.4202	374.59	3.0001	409.666	4.4207	360.32	3.0004
427.563	4.4196	386.22	2.9998			397.32	2.9999			387.4	2.9998	430.035	4.4199	373.14	2.9999	419.558	4.4201	374.83	3.0001	409.688	4.4207	360.62	3.0006
427.58	4.4198	386.58	2.9996			397.63	2.9999			387.75	2.9998	430.055	4.4201	373.36	2.9999	419.583	4.4201	375.06	3.0001	409.711	4.4207	360.92	3.0004
427.597	4.4196	386.93	2.9998			397.94	2.9999			388.09	2.9998	430.073	4.4199	373.58	2.9999	419.608	4.4202	375.3	3.0001	409.733	4.4207	361.22	3.0006
427.613	4.4196	387.28	2.9998			398.24	2.9999			388.43	2.9998	430.092	4.4199	373.79	2.9999	419.632	4.4201	375.53	3.0001	409.756	4.4207	361.52	3.0004
427.629	4.4196	387.63	2.9996			398.54	2.9999			388.76	2.9998	430.111	4.4199	374.01	2.9999	419.657	4.4201	375.76	3.0001	409.778	4.4207	361.81	3.0004
427.646	4.4198	387.97	2.9998			398.83	2.9999			389.1	2.9996	430.13	4.4199	374.22	2.9999	419.682	4.4201	375.99	3.0001	409.8	4.4207	362.11	3.0004
427.662	4.4198	388.32	2.9998			399.13	2.9999			389.43	2.9998	430.149	4.4199	374.43	2.9999	419.707	4.4201	376.22	3.0001	409.823	4.4207	362.4	3.0004
427.678	4.4196	388.66	2.9998			399.42	2.9999			389.76	2.9996	430.167	4.4199	374.64	2.9999	419.731	4.4201	376.45	3.0001	409.845	4.4207	362.69	3.0004
427.694	4.4198	388.99	2.9996			399.71	2.9999			390.08	2.9998	430.186	4.4199	374.85	2.9999	419.756	4.4201	376.68	3.0001	409.867	4.4207	362.98	3.0006
427.71	4.4196	389.33	2.9998			399.99	2.9999			390.4	2.9998	430.204	4.4199	375.06	2.9999	419.78	4.4202	376.9	3.0001	409.889	4.4207	363.26	3.0004
427.726	4.4196	389.66	2.9998			400.27	2.9999			390.73	2.9998	430.223	4.4201	375.27	3.0001	419.804	4.4202	377.13	3.0002	409.911	4.4207	363.55	3.0006
427.742	4.4198	389.99	2.9996			400.55	2.9998			391.04	2.9998	430.241	4.4201	375.48	2.9999	419.828	4.4201	377.35	3.0001	409.933	4.4207	363.83	3.0004
427.755	4.4196	390.31	2.9998			400.83	2.9999			391.36	2.9998	430.26	4.4199	375.69	2.9999	419.853	4.4202	377.58	3.0001	409.955	4.4207	364.11	3.0006
		390.63	2.9998			401.1	2.9999			391.67	2.9998	430.278	4.4199	375.89	2.9999	419.877	4.4202	377.8	3.0001	409.976	4.4207	364.39	3.0004
		390.95	2.9996			401.37	2.9999			391.98	2.9998	430.297	4.4201	376.09	2.9999	419.901	4.4202	378.02	3.0001	409.998	4.4207	364.66	3.0004
		391.27	2.9998			401.64	2.9999			392.29	2.9998	430.315	4.4199	376.3	2.9999	419.925	4.4202	378.24	3.0001	410.02	4.4207	364.94	3.0006
		391.59	2.9998			401.91	2.9999			392.59	2.9998	430.333	4.4199	376.5	3.0001	419.949	4.4201	378.46	3.0001	410.041	4.4207	365.21	3.0004
		391.9	2.9998			402.17	2.9999			392.9	2.9999	430.351	4.4199	376.7	3.0001	419.972	4.4201	378.67	3.0001	410.063	4.4207	365.49	3.0006
		392.21	2.9996			402.43	2.9999			393.2	2.9998	430.369	4.4199	376.9	2.9999	419.996	4.4201	378.89	3.0001	410.084	4.4207	365.76	3.0004
		392.51	2.9996			402.69	2.9999			393.49	2.9999	430.387	4.4199	377.1	2.9999	420.02	4.4202	379.1	3.0001	410.105	4.4207	366.02	3.0004
		392.82	2.9998			402.95	2.9999			393.79	2.9998	430.405	4.4199	377.3	2.9999	420.043	4.4201	379.32	3.0001	410.127	4.4207	366.29	3.0004
		393.12	2.9996			403.2	2.9999			394.08	2.9998	430.423	4.4199	377.5	2.9999	420.067	4.4201	379.53	3.0001	410.148	4.4207	366.56	3.0004
		393.42	2.9998			403.45	2.9999			394.37	2.9998	430.44	4.4201	377.7	3.0001	420.09	4.4201	379.74	3.0001	410.169	4.4207	366.82	3.0004
		393.72	2.9996			403.7	2.9998			394.66	2.9998	430.458	4.4199	377.89	2.9999	420.113	4.4201	379.95	3.0001	410.19	4.4207	367.08	3.0004
		394.01	2.9998			403.94	2.9999			394.94	2.9998	430.476	4.4201	378.09	2.9999	420.137	4.4202	380.16	3.0001	410.211	4.4207	367.34	3.0004
		394.3	2.9998			404.19	2.9999			395.23	2.9998	430.494	4.4201	378.28	2.9999	420.16	4.4202	380.37	3.0001	410.232	4.4207	367.6	3.0004
		394.59	2.9998			404.43	2.9999			395.51	2.9998	430.511	4.4199	378.48	2.9999	420.183	4.4201	380.58	3.0001	410.253	4.4207	367.85	3.0004
		394.88	2.9998			404.67	2.9999			395.79	2.9998	430.529	4.4199	378.67	3.0001	420.206	4.4201	380.78	3.0001	410.274	4.4207	368.11	3.0004
		395.16	2.9996			404.9	2.9999			396.06	2.9996	430.546	4.4199	378.86	2.9999	420.229	4.4202	380.99	3.0001	410.295	4.4207	368.36	3.0004
		395.44	2.9998			405.14	2.9999			396.34	2.9998	430.563	4.4201	379.05	3.0001	420.252	4.4201	381.19	3.0001	410.315	4.4207	368.62	3.0006
		395.72	2.9998			405.37	2.9999			396.61	2.9998	430.581	4.4199	379.24	2.9999	420.275	4.4201	381.4	3.0001	410.336	4.4207	368.87	3.0004
		396	2.9996			405.6	2.9999			396.88	2.9998	430.598	4.4199	379.43	2.9999	420.298	4.4201	381.6	3.0001	410.356	4.4207	369.11	3.0006
		396.27	2.9998			405.82	2.9999			397.14	2.9998	430.615	4.4199	379.62	2.9999	420.32	4.4201	381.8	3.0001	410.377	4.4207	369.36	3.0004
		396.55	2.9996			406.05	2.9999			397.41	2.9998	430.632	4.4199	379.81	2.9999	420.343	4.4202	382	3.0001	410.397	4.4207	369.61	3.0006
		396.81	2.9996			406.27	2.9999			397.67	2.9998	430.65	4.4199	379.99	2.9999	420.366	4.4201	382.2	3.0001	410.418	4.4207	369.86	3.0006
		397.08	2.9998			406.49	2.9999			397.93	2.9998	430.667	4.4199	380.18	3.0001	420.388	4.4201	382.4	3.0001	410.438	4.4207	370.1	3.0006
		397.35	2.9996			406.71	2.9999			398.19	2.9998	430.684	4.4199	380.36	2.9999	420.411	4.4201	382.59	3.0001	410.459	4.4207	370.35	3.0006
		397.61	2.9998			406.92	2.9999			398.45	2.9998	430.7	4.4199	380.55	2.9999	420.433	4.4201	382.79	3.0001	410.479	4.4207	370.59	3.0004
		397.87	2.9998			407.14	2.9999			398.7	2.9998	430.717	4.4199	380.73	2.9999	420.456	4.4201	382.98	3.0001	410.499	4.4207	370.82	3.0004
		398.13	2.9998			407.35	2.9999			398.95	2.9998	430.734	4.4199	380.91	2.9999	420.478	4.4201	383.18	3.0001	410.519	4.4207	371.06	3.0004
		398.38	2.9998			407.56	2.9999			399.2	2.9998	430.751	4.4199	381.1	2.9999	420.5	4.4201	383.37	3.0001	410.539	4.4207	371.3	3.0006
		398.64	2.9996			407.76	2.9999			399.45	2.9998	430.767	4.4199	381.28	2.9999	420.522	4.4201	383.56	3.0001	410.559	4.4207	371.53	3.0004
		398.89	2.9998			407.97	2.9998			399.7	2.9998	430.784	4.4199	381.46	2.9999	420.545	4.4202	383.75	3.0001	410.579	4.4207	371.76	3.0004
		399.14	2.9998			408.17	2.9999			399.94	2.9998	430.8	4.4199	381.64	2.9999	420.567	4.4201	383.94	3.0001	410.599	4.4207	371.99	3.0004
		399.38	2.9998			408.37	2.9999			400.18	2.9998	430.817	4.4199	381.82	2.9999	420.589	4.4201	384.13	3.0001	410.618	4.4207	372.22	3.0004
		399.63	2.9998			408.57	2.9999			400.42	2.9998	430.834	4.4199	381.99	3.0001	420.611	4.4202	384.32	3.0001	410.638	4.4206	372.45	3.0004
		399.87	2.9998			408.77	2.9999			400.66	2.9998	430.85	4.4199	382.17	2.9999	420.633	4.4201	384.51	3.0001	410.658	4.4207	372.68	3.0004
		400.11	2.9998			408.96	2.9999			400.89	2.9998	430.867	4.4201	382.35	2.9999	420.654	4.4201	384.7	3.0001	410.677	4.4207	372.9	3.0004
		400.35	2.9998			409.15	2.9999			401.12	2.9998	430.883	4.4199	382.52	2.9999	420.676	4.4202	384.88	3.0001	410.697	4.4207	373.13	3.0006
		400.59	2.9996			409.34	2.9999			401.36	2.9998	430.899	4.4199	382.7	2.9999	420.698	4.4202	385.07	3.0001	410.716	4.4206	373.35	3.0006
		400.82	2.9998			409.53	2.9999			401.59	2.9998	430.916	4.4199	382.87	2.9999	420.719	4.4202	385.25	3.0001	410.736	4.4207	373.57	3.0004
		401.05	2.9998			409.72	2.9999			401.81	2.9998	430.932	4.4199	383.05	2.9999	420.741	4.4202	385.43	3.0001	410.755	4.4207	373.79	3.0004
		401.28	2.9998			409.9	2.9998			402.04	2.9998	430.948	4.4199	383.22	2.9999	420.762	4.4201	385.61	3.0001	410.774	4.4207	374.01	3.0006
		401.51	2.9996			410.09	2.9999			402.26	2.9998	430.964	4.4199	383.39	3.0001	420.784	4.4201	385.8	3.0001	410.794	4.4207	374.22	3.0004
		401.74	2.9998			410.27	2.9998			402.48	2.9998	430.98	4.4201	383.56	2.9999	420.805	4.4201	385.98	3.0001	410.813	4.4207	374.44	3.0004
		401.96	2.9998			410.44	2.9999			402.7	2.9998	430.996	4.4199	383.73	2.9999	420.827	4.4201	386.15	3.0001	410.832	4.4207	374.65	3.0004
		402.18	2.9998			410.62	2.9998			402.92	2.9998	431.012	4.4199	383.9	2.9999	420.848	4.4202	386.33	3.0001	410.851	4.4207	374.87	3.0004
		402.4	2.9998			410.8	2.9999			403.14	2.9998	431.028	4.4199	384.07	2.9999	420.869	4.4202	386.51	3.0001	410.87	4.4207	375.08	3.0006
		402.62	2.9998			410.97	2.9999			403.35	2.9996	431.044	4.4199	384.24	2.9999	420.89	4.4201	386.69	3.0001	410.889	4.4207	375.29	3.0004
		402.84	2.9998			411.14	2.9998			403.56	2.9998	431.06	4.4201	384.41	2.9999	420.911	4.4201	386.86	3.0001	410.908	4.4207	375.5	3.0004
		403.05	2.9998			411.31	2.9999			403.77	2.9998	431.075	4.4199	384.58	3.0001	420.932	4.4201	387.04	3.0001	410.927	4.4207	375.7	3.0004
		403.26	2.9998			411.48	2.9999			403.98	2.9998	431.091	4.4199	384.75	2.9999	420.953	4.4202	387.21	3.0001	410.946	4.4207	375.91	3.0004
		403.47	2.9996			411.64	2.9999			404.19	2.9998	431.098	4.4199	384.91	2.9999	420.974	4.4201	387.38	3.0001	410.965	4.4207	376.12	3.0006
		403.68	2.9998			411.81	2.9999			404.39	2.9998			385.08	2.9999	420.995	4.4201	387.56	3.0001	410.983	4.4207	376.32	3.0006
		403.89	2.9998			411.97	2.9999			404.59	2.9998			385.24	2.9999	421.016	4.4201	387.73	3.0001	411.002	4.4207	376.52	3.0004
		404.09	2.9998			412.13	2.9999			404.8	2.9998			385.41	2.9999	421.036	4.4201	387.9	3.0001	411.021	4.4207	376.72	3.0006
		404.29	2.9996			412.29	2.9998			405	2.9998			385.57	2.9999	421.057	4.4201	388.07	3.0001	411.039	4.4207	376.92	3.0004
		404.49	2.9998			412.45	2.9999			405.19	2.9998			385.73	2.9999	421.078	4.4201	388.24	3.0001	411.058	4.4207	377.12	3.0006
		404.69	2.9998			412.61	2.9999			405.39	2.9998			385.9	2.9999	421.098	4.4201	388.4	3.0001	411.077	4.4207	377.32	3.0006
		404.89	2.9998			412.76	2.9998			405.58	2.9998			386.06	3.0001	421.118	4.4202	388.57	3.0001	411.095	4.4207	377.52	3.0004
		405.09	2.9998			412.91	2.9999			405.78	2.9998			386.22	3.0001	421.139	4.4201	388.74	3.0001	411.113	4.4207	377.71	3.0004
		405.28	2.9998			413.06	2.9998			405.97	2.9998			386.38	2.9999	421.159	4.4202	388.9	3.0001	411.132	4.4207	377.91	3.0006
		405.47	2.9998			413.21	2.9999			406.16	2.9998			386.54	2.9999	421.179	4.4201	389.07	3.0001	411.15	4.4207	378.1	3.0004
		405.66	2.9998			413.36	2.9999			406.34	2.9998			386.7	2.9999	421.2	4.4201	389.23	3.0001	411.169	4.4207	378.29	3.0004
		405.85	2.9998			413.51	2.9999			406.53	2.9998			386.86	2.9999	421.22	4.4201	389.39	3.0001	411.187	4.4207	378.48	3.0004
		406.03	2.9998			413.65	2.9999			406.71	2.9998			387.01	3.0001	421.24	4.4201	389.56	3.0001	411.205	4.4206	378.67	3.0006
		406.22	2.9998			413.79	2.9999			406.9	2.9998			387.17	3.0001	421.26	4.4201	389.72	3.0001	411.223	4.4207	378.86	3.0004
		406.4	2.9996			413.94	2.9999			407.08	2.9998			387.33	2.9999	421.28	4.4201	389.88	3.0001	411.241	4.4207	379.05	3.0004
		406.58	2.9996			414.08	2.9999			407.26	2.9998			387.48	2.9999	421.3	4.4201	390.04	3.0001	411.259	4.4207	379.24	3.0004
		406.76	2.9998			414.132	3.003			407.43	2.9998			387.64	3.0001	421.32	4.4201	390.2	3.0001	411.277	4.4207	379.42	3.0006
		406.94	2.9998			414.159	3.001			407.61	2.9998			387.8	2.9999	421.34	4.4201	390.36	2.9999	411.295	4.4207	379.6	3.0006
		407.12	2.9996			414.215	2.9999			407.79	2.9998			387.95	2.9999	421.359	4.4201	390.51	3.0001	411.313	4.4207	379.79	3.0006
		407.29	2.9998			414.352	2.9999			407.96	2.9998			388.1	2.9999	421.379	4.4201	390.67	3.0001	411.33	4.4206	379.97	3.0006
		407.47	2.9998			414.488	2.9999			408.13	2.9998			388.26	2.9999	421.399	4.4201	390.83	3.0001	411.348	4.4207	380.15	3.0004
		407.64	2.9998			414.622	2.9999			408.3	2.9998			388.41	2.9999	421.418	4.4201	390.98	3.0001	411.366	4.4207	380.33	3.0004
		407.81	2.9998			414.755	2.9998			408.47	2.9998			388.56	2.9999	421.438	4.4201	391.13	3.0001	411.384	4.4207	380.51	3.0004
		407.98	2.9998			414.887	2.9999			408.64	2.9998			388.71	3.0001	421.458	4.4201	391.29	2.9999	411.401	4.4207	380.69	3.0006
		408.14	2.9996			415.017	2.9998			408.8	2.9998			388.86	2.9999	421.477	4.4201	391.44	2.9999	411.419	4.4207	380.86	3.0006
		408.31	2.9998			415.146	2.9999			408.97	2.9998			389.02	3.0001	421.496	4.4201	391.59	3.0001	411.436	4.4207	381.04	3.0004
		408.47	2.9998			415.273	2.9999			409.13	2.9998			389.17	3.0001	421.516	4.4201	391.74	3.0001	411.454	4.4207	381.21	3.0006
		408.63	2.9998			415.399	2.9998			409.29	2.9998			389.31	2.9999	421.535	4.4202	391.9	3.0001	411.471	4.4207	381.38	3.0006
		408.79	2.9998			415.524	2.9999			409.45	2.9998			389.46	2.9999	421.554	4.4201	392.05	3.0001	411.489	4.4207	381.56	3.0004
		408.95	2.9998			415.647	2.9999			409.61	2.9996			389.61	3.0001	421.573	4.4201	392.19	3.0001	411.506	4.4207	381.73	3.0006
		409.11	2.9996			415.769	2.9999			409.77	2.9998			389.76	2.9999	421.592	4.4201	392.34	3.0001	411.523	4.4207	381.9	3.0004
		409.27	2.9996			415.89	2.9999			409.92	2.9998			389.91	3.0001	421.611	4.4201	392.49	3.0001	411.541	4.4207	382.07	3.0004
		409.42	2.9998			416.009	2.9999			410.07	2.9996			390.05	2.9999	421.63	4.4201	392.64	3.0001	411.558	4.4207	382.23	3.0004
		409.57	2.9996			416.127	2.9999			410.23	2.9998			390.2	3.0001	421.649	4.4201	392.78	3.0001	411.575	4.4207	382.4	3.0006
		409.73	2.9998			416.244	2.9999			410.38	2.9998			390.35	2.9999	421.668	4.4201	392.93	3.0001	411.592	4.4207	382.57	3.0006
		409.88	2.9998			416.36	2.9999			410.53	2.9998			390.49	2.9999	421.687	4.4202	393.07	3.0001	411.609	4.4207	382.73	3.0004
		410.02	2.9998			416.474	2.9999			410.68	2.9998			390.64	2.9999	421.706	4.4201	393.22	3.0001	411.626	4.4207	382.9	3.0006
		410.17	2.9998			416.588	2.9999			410.82	2.9998			390.78	3.0001	421.725	4.4201	393.36	3.0001	411.642	4.4207	383.06	3.0006
		410.32	2.9998			416.7	2.9999			410.97	2.9998			390.92	2.9999	421.744	4.4201	393.5	3.0001	411.659	4.4207	383.22	3.0004
		410.46	2.9996			416.811	2.9998			411.12	2.9998			391.07	2.9999	421.762	4.4201	393.65	3.0001	411.676	4.4207	383.38	3.0004
		410.61	2.9998			416.921	2.9999			411.26	2.9998			391.21	2.9999	421.781	4.4201	393.79	3.0001	411.693	4.4207	383.54	3.0006
		410.75	2.9998			417.029	2.9999			411.4	2.9996			391.35	2.9999	421.799	4.4201	393.93	3.0001	411.709	4.4207	383.7	3.0006
		410.89	2.9998			417.137	2.9999			411.54	2.9998			391.49	2.9999	421.818	4.4201	394.07	3.0001	411.726	4.4206	383.86	3.0004
		411.028	3.0015			417.243	2.9999			411.68	2.9998			391.63	2.9999	421.837	4.4201	394.21	2.9999	411.743	4.4207	384.02	3.0004
		411.056	3.0002			417.348	2.9999			411.709	3.002			391.77	3.0001	421.855	4.4201	394.236	3.0028	411.76	4.4207	384.17	3.0004
		411.166	2.9996			417.452	2.9999			411.737	3.0004			391.91	2.9999	421.873	4.4201	394.264	3.0007	411.776	4.4206	384.33	3.0006
		411.303	2.9998			417.555	2.9999			411.82	2.9998			392.05	3.0001	421.892	4.4201	394.347	3.0001	411.792	4.4206	384.48	3.0006
		411.438	2.9996			417.657	2.9999			411.957	2.9998			392.194	3.0049	421.91	4.4202	394.485	3.0001	411.809	4.4207	384.64	3.0006
		411.573	2.9996			417.758	2.9999			412.093	2.9998			392.222	3.0019	421.928	4.4201	394.623	3.0001	411.825	4.4207	384.79	3.0006
		411.706	2.9996			417.858	2.9999			412.228	2.9998			392.277	3.0006	421.946	4.4201	394.76	3.0001	411.842	4.4206	384.94	3.0004
		411.837	2.9998			417.957	2.9999			412.361	2.9998			392.333	3.0001	421.964	4.4201	394.896	3.0001	411.858	4.4206	385.09	3.0006
		411.968	2.9998			418.055	2.9999			412.494	2.9998			392.471	3.0001	421.983	4.4201	395.031	3.0001	411.875	4.4207	385.24	3.0004
		412.097	2.9996			418.151	2.9998			412.625	2.9998			392.609	2.9999	422	4.4202	395.166	3.0001	411.891	4.4207	385.39	3.0004
		412.225	2.9998			418.247	2.9999			412.755	2.9998			392.746	2.9999	422.019	4.4201	395.3	3.0001	411.907	4.4207	385.54	3.0004
		412.351	2.9996			418.342	2.9999			412.883	2.9998			392.883	2.9999	422.036	4.4202	395.433	3.0001	411.923	4.4206	385.69	3.0006
		412.477	2.9998			418.435	2.9999			413.011	2.9998			393.02	2.9999	422.054	4.4201	395.566	3.0001	411.939	4.4207	385.83	3.0004
		412.601	2.9998			418.528	2.9999			413.137	2.9998			393.156	2.9999	422.072	4.4201	395.699	3.0001	411.955	4.4207	385.98	3.0006
		412.724	2.9996			418.62	2.9999			413.263	2.9998			393.291	2.9999	422.09	4.4201	395.83	2.9999	411.971	4.4207	386.12	3.0006
		412.846	2.9998			418.711	2.9999			413.387	2.9998			393.426	3.0001	422.108	4.4201	395.961	3.0001	411.987	4.4206	386.27	3.0004
		412.967	2.9998			418.801	2.9999			413.51	2.9998			393.561	2.9999	422.125	4.4201	396.091	3.0001	412.003	4.4207	386.41	3.0004
		413.087	2.9996			418.89	2.9999			413.632	2.9998			393.695	2.9999	422.143	4.4201	396.221	3.0001	412.019	4.4207	386.55	3.0004
		413.205	2.9996			418.978	2.9999			413.752	2.9998			393.828	3.0001	422.16	4.4202	396.35	3.0001	412.035	4.4207	386.69	3.0006
		413.323	2.9998			419.065	2.9999			413.872	2.9998			393.962	2.9999	422.178	4.4202	396.478	3.0001	412.051	4.4206	386.83	3.0004
		413.439	2.9996			419.151	2.9999			413.991	2.9998			394.094	2.9999	422.195	4.4201	396.606	3.0001	412.067	4.4207	386.97	3.0004
		413.554	2.9998			419.237	2.9999			414.108	2.9998			394.227	2.9999	422.213	4.4202	396.733	3.0001	412.082	4.4207	387.03	3.002
		413.668	2.9998			419.321	2.9999			414.225	2.9998			394.358	2.9999	422.23	4.4202	396.86	3.0001			387.057	3.0007
		413.781	2.9996			419.405	2.9999			414.34	2.9998			394.49	2.9999	422.248	4.4201	396.986	2.9999			387.113	3.0006
		413.893	2.9998			419.488	2.9999			414.455	2.9998			394.621	2.9999	422.265	4.4202	397.111	3.0001			387.251	3.0004
		414.004	2.9998			419.57	2.9999			414.568	2.9998			394.752	2.9999	422.282	4.4201	397.236	3.0001			387.388	3.0004
		414.114	2.9998			419.651	2.9999			414.68	2.9998			394.882	2.9999	422.299	4.4201	397.36	3.0001			387.525	3.0004
		414.223	2.9998			419.731	2.9999			414.792	2.9998			395.011	2.9999	422.317	4.4201	397.483	3.0001			387.661	3.0004
		414.33	2.9998			419.811	2.9999			414.902	2.9998			395.141	2.9999	422.334	4.4202	397.606	3.0001			387.795	3.0006
		414.437	2.9998			419.889	2.9999			415.011	2.9998			395.269	2.9999	422.351	4.4201	397.729	3.0001			387.929	3.0004
		414.543	2.9998			419.967	2.9999			415.12	2.9998			395.398	3.0001	422.368	4.4201	397.85	3.0001			388.062	3.0006
		414.648	2.9998			420.045	2.9999			415.227	2.9998			395.526	2.9999	422.385	4.4202	397.971	3.0001			388.195	3.0004
		414.751	2.9998			420.121	2.9999			415.334	2.9998			395.653	2.9999	422.402	4.4201	398.092	3.0001			388.327	3.0004
		414.854	2.9998			420.197	2.9999			415.439	2.9998			395.781	2.9999	422.419	4.4201	398.212	3.0001			388.457	3.0004
		414.956	2.9998			420.271	2.9999			415.544	2.9998			395.907	2.9999	422.436	4.4202	398.332	3.0001			388.587	3.0004
		415.057	2.9996			420.346	2.9999			415.647	2.9999			396.034	2.9999	422.453	4.4201	398.45	3.0001			388.717	3.0004
		415.157	2.9996			420.419	2.9999			415.75	2.9998			396.159	3.0001	422.469	4.4202	398.569	3.0001			388.845	3.0004
		415.255	2.9998			420.491	2.9999			415.852	2.9998			396.285	2.9999	422.486	4.4201	398.686	3.0001			388.973	3.0004
		415.353	2.9998			420.563	2.9999			415.953	2.9998			396.41	2.9999	422.503	4.4201	398.803	3.0001			389.1	3.0004
		415.45	2.9998			420.635	2.9999			416.053	2.9998			396.535	2.9999	422.519	4.4201	398.92	3.0001			389.226	3.0004
		415.547	2.9998			420.705	2.9999			416.152	2.9998			396.659	2.9999	422.536	4.4201	399.036	3.0001			389.352	3.0004
		415.642	2.9998			420.775	2.9999			416.25	2.9998			396.783	2.9999	422.553	4.4201	399.151	3.0001			389.476	3.0006
		415.736	2.9996			420.844	2.9999			416.347	2.9998			396.906	2.9999	422.569	4.4201	399.266	3.0001			389.601	3.0006
		415.83	2.9996			420.913	2.9999			416.443	2.9998			397.029	2.9999	422.586	4.4201	399.381	3.0001			389.724	3.0006
		415.922	2.9996			420.98	2.9999			416.539	2.9998			397.152	3.0001	422.602	4.4201	399.495	3.0001			389.846	3.0004
		416.014	2.9998			421.047	2.9999			416.634	2.9998			397.274	2.9999	422.618	4.4201	399.608	3.0001			389.968	3.0004
		416.105	2.9998			421.114	2.9999			416.728	2.9998			397.396	2.9999	422.635	4.4201	399.721	3.0001			390.089	3.0004
		416.195	2.9998			421.18	2.9999			416.821	2.9998			397.518	2.9999	422.651	4.4201	399.833	2.9999			390.21	3.0004
		416.284	2.9998			421.245	2.9999			416.913	2.9998			397.639	3.0001	422.668	4.4202	399.944	3.0001			390.33	3.0004
		416.372	2.9998			421.31	2.9999			417.004	2.9998			397.76	2.9999	422.684	4.4201	400.055	3.0001			390.449	3.0004
		416.46	2.9998			421.373	2.9999			417.095	2.9998			397.88	2.9999	422.7	4.4201	400.166	3.0002			390.567	3.0004
		416.546	2.9998			421.437	2.9999			417.184	2.9998			398	3.0001	422.716	4.4201	400.276	3.0001			390.685	3.0006
		416.632	2.9998			421.5	2.9999			417.273	2.9998			398.119	2.9999	422.732	4.4201	400.385	3.0001			390.802	3.0004
		416.717	2.9998			421.562	2.9999			417.361	2.9998			398.239	2.9999	422.748	4.4201	400.494	3.0001			390.918	3.0006
		416.801	2.9996			421.623	2.9999			417.449	2.9998			398.357	2.9999	422.764	4.4201	400.603	3.0001			391.034	3.0004
		416.885	2.9998			421.684	2.9999			417.536	2.9998			398.476	2.9999	422.78	4.4201	400.711	3.0001			391.149	3.0004
		416.968	2.9996			421.745	2.9999			417.621	2.9998			398.594	2.9999	422.796	4.4202	400.818	3.0001			391.263	3.0006
		417.05	2.9998			421.804	2.9999			417.706	2.9998			398.712	2.9999	422.812	4.4201	400.925	3.0001			391.377	3.0004
		417.131	2.9996			421.864	2.9999			417.791	2.9998			398.829	3.0001	422.828	4.4201	401.031	3.0001			391.49	3.0004
		417.211	2.9998			421.922	2.9999			417.874	2.9998			398.946	2.9999	422.844	4.4202	401.137	3.0001			391.602	3.0006
		417.291	2.9998			421.981	2.9999			417.957	2.9998			399.062	2.9999	422.86	4.4201	401.243	3.0001			391.714	3.0006
		417.37	2.9996			422.038	2.9998			418.039	2.9998			399.179	2.9999	422.875	4.4201	401.348	3.0001			391.825	3.0004
		417.448	2.9998			422.095	2.9998			418.121	2.9998			399.294	2.9999	422.882	4.4201	401.452	3.0001			391.935	3.0004
		417.526	2.9998			422.152	2.9999			418.202	2.9998			399.41	2.9999			401.556	3.0001			392.045	3.0004
		417.602	2.9998			422.208	2.9999			418.281	2.9998			399.525	3.0001			401.659	3.0001			392.154	3.0004
		417.678	2.9998			422.263	2.9999			418.361	2.9998			399.64	2.9999			401.762	3.0001			392.263	3.0004
		417.754	2.9998			422.318	2.9999			418.439	2.9998			399.754	2.9999			401.865	3.0001			392.371	3.0004
		417.828	2.9998			422.373	2.9999			418.517	2.9998			399.868	2.9999			401.966	3.0001			392.478	3.0004
		417.902	2.9996			422.427	2.9999			418.594	2.9998			399.982	2.9999			402.068	3.0001			392.585	3.0006
		417.976	2.9996			422.48	2.9999			418.671	2.9998			400.095	2.9999			402.169	3.0001			392.691	3.0004
		418.048	2.9998			422.533	2.9999			418.747	2.9998			400.208	2.9999			402.269	3.0001			392.796	3.0006
		418.12	2.9998			422.586	2.9998			418.822	2.9998			400.321	2.9999			402.369	3.0001			392.901	3.0004
		418.192	2.9998			422.638	2.9998			418.897	2.9998			400.433	2.9999			402.469	3.0001			393.005	3.0004
		418.262	2.9998			422.69	2.9999			418.97	2.9998			400.545	2.9999			402.568	3.0001			393.109	3.0006
		418.332	2.9998			422.741	2.9999			419.044	2.9998			400.656	2.9999			402.666	3.0001			393.212	3.0006
		418.402	2.9998			422.791	2.9999			419.116	2.9998			400.768	2.9999			402.764	3.0001			393.315	3.0006
		418.471	2.9998			422.842	2.9999			419.188	2.9998			400.878	2.9999			402.862	3.0001			393.417	3.0006
		418.539	2.9998			422.891	2.9999			419.26	2.9998			400.989	2.9999			402.959	3.0001			393.518	3.0004
		418.606	2.9998			422.941	2.9999			419.33	2.9998			401.099	3.0001			403.056	3.0001			393.619	3.0006
		418.673	2.9998			422.99	2.9999			419.401	2.9998			401.209	2.9999			403.152	3.0001			393.719	3.0004
		418.74	2.9998			423.038	2.9999			419.47	2.9998			401.319	3.0001			403.248	3.0001			393.819	3.0006
		418.805	2.9998			423.086	2.9999			419.539	2.9998			401.428	2.9999			403.343	3.0001			393.918	3.0006
		418.871	2.9998			423.134	2.9999			419.608	2.9998			401.537	2.9999			403.438	3.0001			394.016	3.0004
		418.935	2.9998			423.181	2.9999			419.675	2.9998			401.645	2.9999			403.533	3.0001			394.114	3.0006
		418.999	2.9996			423.228	2.9999			419.743	2.9998			401.753	2.9999			403.627	3.0001			394.212	3.0004
		419.063	2.9998			423.274	2.9999			419.809	2.9998			401.861	2.9999			403.72	3.0001			394.309	3.0004
		419.125	2.9996			423.32	2.9999			419.875	2.9998			401.969	3.0001			403.813	3.0001			394.405	3.0004
		419.188	2.9998			423.366	2.9999			419.941	2.9998			402.076	2.9999			403.906	3.0001			394.501	3.0004
		419.25	2.9998			423.411	2.9999			420.005	2.9998			402.183	3.0001			403.998	3.0001			394.596	3.0004
		419.311	2.9998			423.456	2.9999			420.07	2.9998			402.289	2.9999			404.09	3.0001			394.691	3.0006
		419.371	2.9998			423.5	2.9999			420.134	2.9998			402.395	2.9999			404.181	3.0001			394.785	3.0004
		419.432	2.9996			423.545	2.9999			420.197	2.9998			402.501	2.9999			404.272	3.0001			394.878	3.0006
		419.491	2.9998			423.588	2.9999			420.26	2.9998			402.607	2.9999			404.363	3.0001			394.971	3.0006
		419.55	2.9998			423.632	2.9999			420.322	2.9998			402.712	3.0001			404.453	3.0001			395.064	3.0006
		419.609	2.9998			423.675	2.9999			420.384	2.9998			402.817	2.9999			404.542	3.0001			395.156	3.0006
		419.667	2.9998			423.717	2.9999			420.445	2.9998			402.921	2.9999			404.632	3.0001			395.248	3.0004
		419.725	2.9996			423.76	2.9999			420.505	2.9998			403.026	2.9999			404.72	3.0001			395.339	3.0004
		419.782	2.9998			423.801	2.9999			420.566	2.9998			403.13	2.9999			404.809	3.0001			395.429	3.0004
		419.838	2.9998			423.843	2.9999			420.625	2.9998			403.233	2.9999			404.897	3.0001			395.519	3.0006
		419.894	2.9998			423.884	2.9999			420.684	2.9998			403.337	3.0001			404.984	3.0001			395.609	3.0006
		419.95	2.9998			423.925	2.9999			420.743	2.9998			403.44	2.9999			405.071	3.0001			395.698	3.0004
		420.005	2.9998			423.966	2.9999			420.801	2.9998			403.542	2.9999			405.158	3.0001			395.786	3.0004
		420.06	2.9998			424.006	2.9999			420.859	2.9998			403.645	2.9999			405.244	3.0001			395.874	3.0006
		420.114	2.9998			424.046	2.9999			420.916	2.9998			403.747	2.9999			405.33	3.0001			395.962	3.0006
		420.168	2.9998			424.086	2.9999			420.973	2.9998			403.849	2.9999			405.415	3.0001			396.049	3.0004
		420.221	2.9998			424.125	2.9999			421.029	2.9998			403.95	2.9999			405.5	3.0001			396.135	3.0004
		420.274	2.9998			424.164	2.9999			421.085	2.9998			404.051	2.9999			405.585	3.0001			396.221	3.0004
		420.326	2.9998			424.202	2.9999			421.14	2.9998			404.152	2.9999			405.669	3.0001			396.307	3.0004
		420.378	2.9998			424.241	2.9999			421.195	2.9998			404.252	2.9999			405.753	3.0001			396.392	3.0006
		420.43	2.9998			424.279	2.9999			421.25	2.9998			404.353	2.9999			405.837	3.0001			396.476	3.0004
		420.481	2.9998			424.317	2.9999			421.303	2.9996			404.453	2.9999			405.92	3.0001			396.561	3.0006
		420.531	2.9998			424.354	2.9999			421.357	2.9998			404.552	2.9999			406.003	3.0001			396.644	3.0006
		420.581	2.9998			424.391	2.9999			421.41	2.9998			404.652	2.9999			406.085	3.0001			396.728	3.0004
		420.631	2.9998			424.428	2.9999			421.463	2.9998			404.751	2.9999			406.167	2.9999			396.81	3.0004
		420.68	2.9998			424.465	2.9999			421.515	2.9998			404.849	2.9999			406.248	3.0001			396.893	3.0004
		420.729	2.9996			424.501	2.9999			421.567	2.9998			404.948	2.9999			406.329	3.0001			396.975	3.0004
		420.778	2.9998			424.537	2.9999			421.618	2.9998			405.046	2.9999			406.41	3.0001			397.056	3.0006
		420.826	2.9998			424.573	2.9999			421.669	2.9998			405.144	2.9999			406.491	3.0001			397.137	3.0006
		420.874	2.9998			424.608	2.9999			421.72	2.9998			405.241	2.9999			406.571	3.0001			397.217	3.0004
		420.921	2.9998			424.643	2.9999			421.77	2.9998			405.339	2.9999			406.65	3.0001			397.298	3.0006
		420.968	2.9998			424.678	2.9999			421.82	2.9998			405.436	2.9999			406.73	3.0001			397.377	3.0004
		421.015	2.9998			424.713	2.9999			421.869	2.9996			405.532	3.0001			406.808	3.0001			397.456	3.0006
		421.061	2.9998			424.747	2.9999			421.918	2.9998			405.629	2.9999			406.887	3.0001			397.535	3.0006
		421.107	2.9998			424.782	2.9999			421.967	2.9998			405.725	2.9999			406.965	3.0001			397.613	3.0004
		421.152	2.9996			424.815	2.9999			422.015	2.9998			405.821	2.9999			407.043	3.0001			397.691	3.0006
		421.198	2.9998			424.849	2.9999			422.063	2.9998			405.916	2.9999			407.12	3.0001			397.769	3.0004
		421.242	2.9998			424.883	2.9999			422.11	2.9998			406.011	2.9999			407.197	3.0001			397.846	3.0006
		421.287	2.9998			424.916	2.9999			422.157	2.9998			406.106	2.9999			407.274	3.0001			397.923	3.0004
		421.331	2.9998			424.949	2.9999			422.204	2.9998			406.201	2.9999			407.351	3.0001			397.999	3.0004
		421.374	2.9998			424.981	2.9999			422.25	2.9998			406.295	2.9999			407.426	3.0001			398.075	3.0006
		421.418	2.9998			425.014	2.9999			422.296	2.9998			406.389	2.9999			407.502	3.0001			398.15	3.0004
		421.461	2.9998			425.046	2.9999			422.342	2.9998			406.483	2.9999			407.577	3.0001			398.225	3.0004
		421.503	2.9996			425.078	2.9999			422.387	2.9998			406.577	2.9999			407.652	3.0001			398.3	3.0006
		421.546	2.9996			425.11	2.9999			422.432	2.9998			406.67	3.0001			407.727	3.0001			398.374	3.0006
		421.587	2.9998			425.141	2.9999			422.477	2.9996			406.763	3.0001			407.801	3.0001			398.448	3.0006
		421.629	2.9998			425.173	2.9999			422.521	2.9998			406.856	2.9999			407.875	3.0001			398.521	3.0006
		421.67	2.9996			425.204	2.9999			422.565	2.9998			406.948	2.9999			407.949	3.0001			398.594	3.0004
		421.711	2.9998			425.235	2.9998			422.608	2.9996			407.04	3.0001			408.022	3.0001			398.667	3.0004
		421.752	2.9998			425.265	2.9999			422.652	2.9996			407.132	2.9999			408.095	3.0001			398.739	3.0004
		421.792	2.9998			425.296	2.9999			422.694	2.9998			407.224	3.0001			408.167	3.0001			398.811	3.0006
		421.832	2.9998			425.326	2.9999			422.737	2.9998			407.315	2.9999			408.239	3.0001			398.883	3.0006
		421.872	2.9998			425.356	2.9998			422.779	2.9998			407.406	2.9999			408.311	3.0001			398.954	3.0006
		421.912	2.9998			425.386	2.9999			422.821	2.9998			407.497	2.9999			408.383	3.0001			399.024	3.0006
		421.951	2.9996			425.415	2.9999			422.863	2.9998			407.588	2.9999			408.454	3.0001			399.095	3.0006
		421.99	2.9998			425.445	2.9999			422.904	2.9998			407.678	2.9999			408.525	3.0001			399.165	3.0004
		422.028	2.9998			425.474	2.9999			422.945	2.9998			407.768	2.9999			408.595	3.0001			399.234	3.0006
		422.066	2.9998			425.503	2.9999			422.985	2.9998			407.858	3.0001			408.665	3.0001			399.303	3.0006
		422.104	2.9998			425.532	2.9999			423.026	2.9996			407.947	2.9999			408.735	3.0001			399.372	3.0004
		422.142	2.9998			425.56	2.9999			423.066	2.9998			408.036	3.0001			408.805	3.0001			399.441	3.0006
		422.179	2.9998			425.589	2.9999			423.106	2.9998			408.125	2.9999			408.874	3.0001			399.509	3.0006
		422.216	2.9998			425.617	2.9999			423.145	2.9998			408.214	3.0001			408.943	3.0001			399.577	3.0004
		422.253	2.9998			425.645	2.9999			423.184	2.9998			408.302	3.0001			409.011	3.0001			399.644	3.0004
		422.29	2.9996			425.673	2.9999			423.223	2.9998			408.39	2.9999			409.079	3.0001			399.711	3.0006
		422.326	2.9998			425.7	2.9999			423.262	2.9998			408.478	2.9999			409.147	3.0001			399.778	3.0006
		422.362	2.9998			425.728	2.9999			423.3	2.9998			408.566	2.9999			409.215	3.0001			399.844	3.0006
		422.398	2.9998			425.755	2.9999			423.338	2.9998			408.653	2.9999			409.282	3.0001			399.91	3.0006
		422.433	2.9998			425.782	2.9999			423.375	2.9996			408.74	3.0001			409.349	3.0001			399.976	3.0004
		422.468	2.9998			425.809	2.9998			423.413	2.9998			408.827	2.9999			409.416	3.0001			400.041	3.0004
		422.503	2.9996			425.836	2.9999			423.45	2.9998			408.914	2.9999			409.482	3.0001			400.106	3.0006
		422.538	2.9998			425.863	2.9999			423.487	2.9998			409	2.9999			409.548	3.0001			400.171	3.0006
		422.573	2.9996			425.889	2.9999			423.524	2.9998			409.086	2.9999			409.614	3.0001			400.235	3.0006
		422.607	2.9998			425.915	2.9999			423.56	2.9998			409.172	2.9999			409.68	3.0001			400.299	3.0006
		422.641	2.9996			425.941	2.9999			423.596	2.9998			409.258	2.9999			409.745	3.0001			400.363	3.0004
		422.674	2.9998			425.967	2.9999			423.632	2.9996			409.343	2.9999			409.81	3.0001			400.426	3.0006
		422.708	2.9998			425.993	2.9999			423.667	2.9998			409.428	2.9999			409.874	3.0001			400.489	3.0006
		422.741	2.9998			426.019	2.9999			423.703	2.9998			409.513	2.9999			409.939	3.0001			400.552	3.0004
		422.774	2.9998			426.044	2.9999			423.738	2.9998			409.598	2.9999			410.003	3.0001			400.614	3.0006
		422.807	2.9998			426.07	2.9999			423.773	2.9998			409.682	2.9999			410.066	3.0002			400.676	3.0006
		422.839	2.9998			426.095	2.9999			423.807	2.9998			409.766	2.9999			410.13	3.0001			400.738	3.0004
		422.872	2.9998			426.12	2.9999			423.841	2.9998			409.85	2.9999			410.193	3.0001			400.799	3.0004
		422.904	2.9996			426.144	2.9999			423.876	2.9998			409.933	2.9999			410.256	3.0001			400.86	3.0004
		422.936	2.9996			426.169	2.9999			423.909	2.9998			410.017	2.9999			410.318	3.0001			400.921	3.0004
		422.967	2.9996			426.194	2.9999			423.943	2.9998			410.1	2.9999			410.38	3.0001			400.981	3.0006
		422.999	2.9998			426.218	2.9999			423.976	2.9998			410.183	2.9999			410.442	3.0001			401.041	3.0006
		423.03	2.9998			426.242	2.9999			424.01	2.9996			410.265	2.9999			410.504	3.0001			401.101	3.0004
		423.061	2.9998			426.266	2.9999			424.042	2.9998			410.347	3.0001			410.565	3.0001			401.16	3.0004
		423.092	2.9998			426.29	2.9999			424.075	2.9998			410.43	3.0001			410.627	3.0001			401.219	3.0006
		423.122	2.9998			426.314	2.9999			424.108	2.9998			410.511	2.9999			410.687	3.0001			401.278	3.0004
		423.153	2.9998			426.338	2.9999			424.14	2.9998			410.593	2.9999			410.748	3.0001			401.337	3.0004
		423.183	2.9998			426.361	2.9999			424.172	2.9998			410.674	2.9999			410.808	3.0001			401.395	3.0004
		423.213	2.9996			426.385	3.0001			424.204	2.9996			410.755	2.9999			410.868	3.0001			401.453	3.0004
		423.242	2.9998			426.408	2.9999			424.235	2.9998			410.836	3.0001			410.928	3.0001			401.511	3.0006
		423.272	2.9998			426.431	2.9999			424.267	2.9998			410.917	2.9999			410.987	3.0001			401.568	3.0004
		423.301	2.9998			426.454	2.9999			424.298	2.9998			410.997	2.9999			411.046	3.0001			401.625	3.0006
		423.33	2.9998			426.477	2.9999			424.329	2.9998			411.077	2.9999			411.105	3.0001			401.682	3.0004
		423.359	2.9998			426.5	2.9999			424.359	2.9998			411.157	2.9999			411.164	3.0001			401.738	3.0006
		423.388	2.9998			426.522	2.9999			424.39	2.9998			411.237	2.9999			411.222	3.0001			401.795	3.0004
		423.417	2.9998			426.545	2.9999			424.42	2.9998			411.317	2.9999			411.281	3.0001			401.851	3.0004
		423.445	2.9998			426.567	2.9999			424.45	2.9998			411.396	2.9999			411.338	3.0001			401.906	3.0004
		423.473	2.9998			426.589	2.9999			424.48	2.9998			411.475	2.9999			411.396	3.0001			401.962	3.0006
		423.501	2.9998			426.611	2.9999			424.51	2.9998			411.553	2.9999			411.453	3.0002			402.017	3.0006
		423.529	2.9998			426.633	2.9999			424.539	2.9998			411.632	2.9999			411.51	3.0001			402.071	3.0006
		423.557	2.9998			426.655	2.9999			424.569	2.9998			411.71	2.9999			411.567	3.0001			402.126	3.0006
		423.584	2.9998			426.677	2.9999			424.598	2.9998			411.788	2.9999			411.624	3.0001			402.18	3.0006
		423.612	2.9998			426.698	2.9999			424.627	2.9998			411.866	2.9999			411.68	3.0001			402.234	3.0004
		423.639	2.9996			426.72	2.9999			424.656	2.9998			411.944	2.9999			411.736	3.0001			402.288	3.0006
		423.666	2.9998			426.741	2.9999			424.684	2.9998			412.021	2.9999			411.792	3.0001			402.341	3.0004
		423.692	2.9996			426.762	2.9999			424.712	2.9998			412.098	2.9999			411.847	3.0001			402.394	3.0004
		423.719	2.9998			426.783	2.9999			424.741	2.9998			412.175	2.9999			411.903	3.0001			402.447	3.0004
		423.746	2.9998			426.804	2.9999			424.769	2.9998			412.252	3.0001			411.958	3.0001			402.5	3.0004
		423.772	2.9998			426.825	2.9999			424.796	2.9998			412.328	2.9999			412.012	3.0001			402.552	3.0004
		423.798	2.9996			426.846	2.9999			424.824	2.9998			412.404	2.9999			412.067	3.0001			402.604	3.0006
		423.824	2.9998			426.867	2.9999			424.851	2.9998			412.48	2.9999			412.121	3.0001			402.656	3.0004
		423.85	2.9998			426.887	2.9999			424.879	2.9998			412.556	3.0001			412.175	3.0001			402.708	3.0006
		423.875	2.9998			426.908	2.9999			424.906	2.9998			412.631	2.9999			412.229	3.0001			402.759	3.0004
		423.901	2.9998			426.928	2.9999			424.933	2.9998			412.707	2.9999			412.283	3.0001			402.81	3.0006
		423.926	2.9996			426.948	2.9999			424.96	2.9998			412.782	3.0001			412.336	3.0001			402.861	3.0004
		423.951	2.9998			426.968	2.9999			424.986	2.9998			412.856	2.9999			412.389	3.0001			402.911	3.0006
		423.976	2.9998			426.988	2.9999			425.013	2.9998			412.931	2.9999			412.442	3.0001			402.962	3.0006
		424.001	2.9998			427.008	2.9999			425.039	2.9998			413.005	2.9999			412.495	3.0001			403.012	3.0004
		424.026	2.9998			427.028	2.9999			425.065	2.9998			413.08	2.9999			412.547	3.0001			403.061	3.0004
		424.05	2.9998			427.048	2.9999			425.091	2.9998			413.154	2.9999			412.599	3.0001			403.111	3.0006
		424.075	2.9998			427.067	2.9999			425.117	2.9999			413.227	2.9999			412.651	3.0001			403.16	3.0004
		424.099	2.9998			427.087	2.9999			425.142	2.9998			413.301	2.9999			412.703	3.0001			403.209	3.0004
		424.123	2.9998			427.106	2.9999			425.168	2.9998			413.374	2.9999			412.754	3.0001			403.258	3.0006
		424.147	2.9998			427.126	2.9999			425.193	2.9998			413.447	2.9999			412.805	3.0001			403.306	3.0004
		424.171	2.9998			427.145	2.9999			425.218	2.9998			413.52	2.9999			412.856	3.0001			403.355	3.0006
		424.195	2.9998			427.164	2.9999			425.243	2.9998			413.593	2.9999			412.907	3.0001			403.403	3.0004
		424.218	2.9998			427.183	2.9999			425.268	2.9998			413.665	2.9999			412.957	3.0001			403.45	3.0004
		424.242	2.9998			427.202	2.9999			425.293	2.9998			413.737	2.9999			413.008	3.0001			403.498	3.0006
		424.265	2.9998			427.221	2.9999			425.317	2.9998			413.809	2.9999			413.058	3.0001			403.545	3.0004
		424.288	2.9998			427.24	3.0001			425.342	2.9998			413.881	2.9999			413.108	3.0001			403.592	3.0004
		424.311	2.9998			427.258	2.9999			425.366	2.9998			413.952	3.0001			413.157	3.0002			403.639	3.0006
		424.334	2.9996			427.277	2.9999			425.39	2.9998			414.024	2.9999			413.207	3.0001			403.686	3.0006
		424.357	2.9998			427.295	2.9999			425.414	2.9998			414.095	2.9999			413.256	3.0001			403.732	3.0006
		424.38	2.9998			427.313	2.9999			425.438	2.9998			414.166	2.9999			413.305	3.0001			403.779	3.0004
		424.402	2.9998			427.332	2.9999			425.462	2.9998			414.236	2.9999			413.354	3.0001			403.825	3.0004
		424.424	2.9998			427.35	2.9999			425.485	2.9998			414.307	2.9999			413.402	3.0001			403.87	3.0004
		424.447	2.9998			427.368	2.9999			425.509	2.9998			414.377	2.9999			413.451	3.0001			403.916	3.0006
		424.469	2.9998			427.386	2.9999			425.532	2.9998			414.447	2.9999			413.499	3.0001			403.961	3.0004
		424.491	2.9998			427.404	2.9999			425.555	2.9998			414.517	2.9999			413.547	3.0001			404.006	3.0004
		424.513	2.9998			427.422	2.9999			425.578	2.9998			414.587	2.9999			413.594	3.0001			404.051	3.0004
		424.534	2.9998			427.44	2.9999			425.601	2.9998			414.656	2.9999			413.642	3.0001			404.096	3.0004
		424.556	2.9998			427.457	2.9999			425.623	2.9998			414.725	2.9999			413.689	3.0001			404.14	3.0004
		424.577	2.9998			427.475	2.9999			425.646	2.9998			414.794	2.9999			413.736	3.0001			404.184	3.0004
		424.599	2.9998			427.492	2.9998			425.668	2.9998			414.863	3.0001			413.783	3.0001			404.228	3.0004
		424.62	2.9998			427.51	2.9999			425.691	2.9998			414.932	3.0001			413.83	3.0001			404.272	3.0006
		424.641	2.9998			427.527	2.9999			425.713	2.9998			415	2.9999			413.876	3.0001			404.315	3.0004
		424.662	2.9996			427.544	2.9999			425.735	2.9998			415.068	2.9999			413.922	3.0001			404.359	3.0006
		424.683	2.9998			427.562	2.9999			425.757	2.9998			415.136	2.9999			413.968	3.0001			404.402	3.0004
		424.704	2.9996			427.579	2.9999			425.779	2.9998			415.204	3.0001			414.014	3.0001			404.445	3.0006
		424.725	2.9998			427.596	2.9999			425.801	2.9998			415.271	2.9999			414.06	3.0001			404.488	3.0004
		424.745	2.9998			427.613	2.9999			425.822	2.9998			415.339	2.9999			414.105	3.0001			404.53	3.0004
		424.766	2.9998			427.629	2.9999			425.844	2.9998			415.406	3.0001			414.151	3.0001			404.572	3.0004
		424.786	2.9998			427.646	2.9999			425.865	2.9998			415.473	2.9999			414.196	3.0001			404.615	3.0004
		424.807	2.9998			427.663	2.9999			425.886	2.9998			415.539	2.9999			414.24	3.0001			404.656	3.0004
		424.827	2.9998			427.68	2.9999			425.907	2.9998			415.606	2.9999			414.285	3.0001			404.698	3.0006
		424.847	2.9996			427.696	2.9999			425.928	2.9998			415.672	2.9999			414.33	3.0001			404.74	3.0004
		424.867	2.9998			427.713	2.9999			425.949	2.9998			415.738	2.9999			414.374	3.0001			404.781	3.0004
		424.887	2.9998			427.729	2.9999			425.97	2.9998			415.804	2.9999			414.418	3.0001			404.822	3.0004
		424.906	2.9998			427.745	2.9999			425.99	2.9998			415.87	2.9999			414.462	3.0001			404.863	3.0004
		424.926	2.9998			427.762	2.9999			426.011	2.9998			415.935	2.9999			414.506	3.0001			404.904	3.0006
		424.946	2.9998			427.778	2.9999			426.031	2.9998			416	2.9999			414.549	3.0001			404.944	3.0004
		424.965	2.9998			427.794	2.9999			426.052	2.9996			416.066	2.9999			414.592	3.0001			404.985	3.0006
		424.984	2.9998			427.81	2.9999			426.072	2.9996			416.13	3.0001			414.636	3.0001			405.025	3.0004
		425.004	2.9998			427.826	2.9999			426.092	2.9996			416.195	2.9999			414.679	3.0001			405.065	3.0006
		425.023	2.9998			427.842	2.9999			426.112	2.9998			416.26	2.9999			414.721	2.9999			405.104	3.0004
		425.042	2.9998			427.858	2.9999			426.132	2.9998			416.324	2.9999			414.764	3.0001			405.144	3.0006
		425.061	2.9998			427.873	2.9999			426.151	2.9998			416.388	2.9999			414.807	3.0001			405.183	3.0004
		425.08	2.9998			427.883	2.9999			426.171	2.9998			416.452	3.0001			414.849	3.0001			405.223	3.0004
		425.098	2.9998							426.191	2.9998			416.516	2.9999			414.891	3.0001			405.262	3.0006
		425.117	2.9998							426.21	2.9998			416.579	2.9999			414.933	2.9999			405.301	3.0004
		425.136	2.9998							426.229	2.9998			416.642	2.9999			414.974	3.0001			405.339	3.0006
		425.154	2.9998							426.249	2.9998			416.706	2.9999			415.016	3.0001			405.378	3.0004
		425.173	2.9998							426.268	2.9998			416.769	2.9999			415.057	3.0001			405.416	3.0006
		425.191	2.9998							426.287	2.9998			416.831	2.9999			415.098	3.0001			405.454	3.0006
		425.209	2.9998							426.306	2.9998			416.894	2.9999			415.139	3.0001			405.492	3.0006
		425.227	2.9998							426.325	2.9998			416.956	3.0001			415.18	3.0001			405.53	3.0006
		425.245	2.9998							426.343	2.9998			417.018	2.9999			415.221	2.9999			405.568	3.0006
		425.263	2.9998							426.362	2.9998			417.08	2.9999			415.261	3.0001			405.605	3.0004
		425.281	2.9996							426.381	2.9999			417.142	2.9999			415.302	3.0001			405.642	3.0006
		425.299	2.9998							426.399	2.9998			417.204	3.0001			415.342	3.0001			405.68	3.0004
		425.317	2.9998							426.417	2.9998			417.265	2.9999			415.382	3.0001			405.717	3.0004
		425.334	2.9998							426.436	2.9998			417.326	2.9999			415.421	3.0001			405.753	3.0004
		425.352	2.9996							426.454	2.9998			417.387	2.9999			415.461	3.0001			405.79	3.0004
		425.369	2.9998							426.472	2.9998			417.448	2.9999			415.501	3.0001			405.827	3.0004
		425.387	2.9998							426.49	2.9998			417.509	2.9999			415.54	3.0001			405.863	3.0004
		425.404	2.9998							426.508	2.9998			417.569	2.9999			415.579	3.0001			405.899	3.0006
		425.421	2.9998							426.526	2.9998			417.629	2.9999			415.618	3.0001			405.935	3.0004
		425.438	2.9998							426.543	2.9998			417.689	2.9999			415.657	3.0001			405.971	3.0004
		425.455	2.9998							426.561	2.9998			417.749	2.9999			415.695	3.0001			406.006	3.0004
		425.472	2.9998							426.579	2.9998			417.809	2.9999			415.734	3.0001			406.042	3.0004
		425.489	2.9998							426.596	2.9998			417.868	2.9999			415.772	3.0001			406.077	3.0004
		425.506	2.9998							426.613	2.9998			417.928	2.9999			415.81	2.9999			406.112	3.0004
		425.523	2.9998							426.631	2.9998			417.987	2.9999			415.849	3.0001			406.147	3.0004
		425.54	2.9998							426.648	2.9998			418.046	3.0001			415.886	3.0001			406.182	3.0004
		425.556	2.9998							426.665	2.9998			418.105	2.9999			415.924	3.0001			406.217	3.0004
		425.573	2.9998							426.682	2.9998			418.163	2.9999			415.962	3.0001			406.252	3.0004
		425.589	2.9998							426.699	2.9998			418.222	2.9999			415.999	3.0001			406.286	3.0004
		425.606	2.9998							426.716	2.9998			418.28	3.0001			416.036	3.0001			406.32	3.0006
		425.622	2.9998							426.733	2.9998			418.338	2.9999			416.073	3.0001			406.354	3.0004
		425.638	2.9998							426.749	2.9998			418.396	2.9999			416.11	3.0001			406.388	3.0006
		425.654	2.9998							426.766	2.9998			418.453	3.0001			416.147	3.0001			406.422	3.0006
		425.67	2.9998							426.783	2.9998			418.511	3.0001			416.183	3.0001			406.456	3.0006
		425.686	2.9998							426.799	2.9998			418.568	2.9999			416.22	3.0001			406.49	3.0006
		425.702	2.9998							426.815	2.9998			418.625	2.9999			416.256	3.0001			406.523	3.0004
		425.718	2.9998							426.832	2.9998			418.682	2.9999			416.292	3.0001			406.556	3.0006
		425.734	2.9998							426.848	2.9998			418.739	2.9999			416.328	3.0001			406.589	3.0004
		425.75	2.9998							426.864	2.9998			418.796	2.9999			416.364	3.0001			406.622	3.0004
		425.759	2.9998							426.88	2.9998			418.852	2.9999			416.4	3.0001			406.655	3.0006
										426.896	2.9998			418.908	3.0001			416.436	3.0001			406.688	3.0006
										426.912	2.9998			418.964	2.9999			416.471	3.0001			406.72	3.0004
										426.928	2.9998			419.02	2.9999			416.506	3.0001			406.753	3.0004
										426.944	2.9998			419.076	2.9999			416.541	2.9999			406.785	3.0004
										426.96	2.9998			419.131	3.0001			416.576	3.0001			406.817	3.0006
										426.963	2.9998			419.187	2.9999			416.611	3.0001			406.849	3.0006
														419.242	2.9999			416.646	3.0001			406.881	3.0006
														419.297	2.9999			416.681	3.0001			406.913	3.0004
														419.352	3.0001			416.715	3.0001			406.945	3.0004
														419.406	2.9999			416.749	3.0001			406.976	3.0004
														419.461	2.9999			416.783	3.0001			407.007	3.0006
														419.515	2.9999			416.817	3.0001			407.038	3.0004
														419.569	2.9999			416.851	3.0001			407.07	3.0006
														419.623	2.9999			416.885	3.0001			407.101	3.0004
														419.677	2.9999			416.919	3.0001			407.131	3.0004
														419.73	2.9999			416.952	3.0001			407.162	3.0004
														419.784	2.9999			416.986	3.0001			407.193	3.0006
														419.837	3.0001			417.019	3.0001			407.223	3.0004
														419.89	2.9999			417.052	3.0001			407.253	3.0004
														419.943	2.9999			417.085	3.0001			407.284	3.0004
														419.996	2.9999			417.118	3.0001			407.314	3.0006
														420.048	2.9999			417.15	3.0001			407.344	3.0004
														420.101	2.9999			417.183	3.0001			407.373	3.0004
														420.153	2.9999			417.215	3.0001			407.403	3.0004
														420.205	2.9999			417.247	3.0001			407.433	3.0006
														420.257	2.9999			417.279	3.0001			407.462	3.0006
														420.309	2.9999			417.312	3.0001			407.491	3.0004
														420.36	2.9999			417.344	3.0001			407.521	3.0004
														420.412	2.9999			417.375	3.0001			407.55	3.0006
														420.463	2.9999			417.407	3.0001			407.579	3.0004
														420.514	2.9999			417.438	3.0001			407.608	3.0006
														420.565	3.0001			417.47	3.0001			407.637	3.0004
														420.616	2.9999			417.501	3.0001			407.665	3.0004
														420.666	3.0001			417.532	2.9999			407.694	3.0004
														420.717	2.9999			417.563	3.0001			407.722	3.0004
														420.767	2.9999			417.594	3.0001			407.751	3.0006
														420.817	2.9999			417.625	3.0001			407.779	3.0004
														420.867	2.9999			417.656	2.9999			407.807	3.0004
														420.917	2.9999			417.686	3.0001			407.835	3.0004
														420.966	2.9999			417.716	3.0001			407.863	3.0004
														421.016	2.9999			417.747	3.0001			407.89	3.0006
														421.065	3.0001			417.777	3.0001			407.918	3.0004
														421.114	2.9999			417.807	3.0001			407.946	3.0004
														421.163	2.9999			417.837	3.0001			407.973	3.0004
														421.212	2.9999			417.867	3.0001			408	3.0004
														421.261	2.9999			417.897	2.9999			408.028	3.0006
														421.309	2.9999			417.926	3.0001			408.055	3.0004
														421.358	2.9999			417.956	2.9999			408.082	3.0004
														421.406	2.9999			417.985	3.0001			408.109	3.0006
														421.454	2.9999			418.014	3.0001			408.136	3.0004
														421.502	2.9999			418.043	3.0001			408.162	3.0004
														421.549	2.9999			418.072	3.0001			408.189	3.0006
														421.597	2.9999			418.101	3.0001			408.215	3.0004
														421.644	2.9999			418.13	3.0001			408.242	3.0006
														421.692	2.9999			418.159	3.0001			408.268	3.0004
														421.739	2.9999			418.187	3.0001			408.294	3.0004
														421.786	2.9999			418.216	3.0001			408.32	3.0004
														421.832	2.9999			418.244	3.0001			408.346	3.0006
[truncated: 317 more rows]

## Sheet: Fig 1c
Capacity (mAh)	3.00–4.10 V	4.10 V	4.10–4.25 V	4.25 V	4.25–4.42 V	4.42 V
2nd cycle	142.48	94.7	75.06	16.83	56.19	42.49
5th cycle	148.48	93.71	72.81	15.93	56	40.47
10th cycle	153.92	91.64	70.18	15.79	55.75	40.64
100th cycle	201.74	65.02	57.64	13.34	54.2	39.16
200th cycle	207.39	54.08	54.55	13.29	53.58	41.31
300th cycle	200.09	50.63	52.11	13.43	52.89	42.92

## Sheet: Fig 1d
After Formation		After 10 cycles		After 100 cycles		After 200 cycles		After 300 cycles
Z' (Ω)	-Z'' (Ω)	Z' (Ω)	-Z'' (Ω)	Z' (Ω)	-Z'' (Ω)	Z' (Ω)	-Z'' (Ω)	Z' (Ω)	-Z'' (Ω)
0.08008	-0.44562	0.1202	-0.19938	0.09614	-0.0992	0.09004	-0.09055	0.08822	-0.02169
0.0808	-0.28532	0.1227	-0.13184	0.0969	-0.06605	0.09077	-0.06121	0.08841	-0.01307
0.08331	-0.18635	0.12444	-0.08757	0.09775	-0.04485	0.09008	-0.04128	0.08898	-0.00678
0.08612	-0.12297	0.12572	-0.0583	0.09722	-0.0303	0.08964	-0.0269	0.08983	-0.00208
0.08792	-0.08155	0.12668	-0.03976	0.09677	-0.01956	0.08993	-0.01661	0.0911	0.00174
0.08939	-0.05411	0.12614	-0.02706	0.09708	-0.01178	0.09075	-0.00925	0.09272	0.00494
0.09039	-0.0368	0.12565	-0.01776	0.09766	-0.00621	0.09179	-0.00402	0.09472	0.00765
0.09004	-0.02495	0.12578	-0.01101	0.09863	-0.00211	0.09309	2.18831e-05	0.09712	0.0104
0.08956	-0.01613	0.12611	-0.0062	0.09973	0.000955228	0.0945	0.00322	0.09999	0.01306
0.0898	-0.00969	0.12678	-0.00277	0.10103	0.00342	0.0962	0.00595	0.10345	0.01585
0.0902	-0.00505	0.12754	-7.09492e-05	0.10265	0.0056	0.09827	0.00844	0.10743	0.01887
0.09095	-0.00168	0.12843	0.00201	0.10439	0.00761	0.10076	0.01078	0.11216	0.02209
0.09181	0.000936651	0.12961	0.00385	0.10654	0.00965	0.1038	0.01317	0.11757	0.02582
0.09289	0.00319	0.13082	0.00563	0.10894	0.01182	0.1072	0.01579	0.12388	0.02993
0.09421	0.00518	0.13222	0.00735	0.11176	0.01426	0.11116	0.01868	0.1313	0.03461
0.09569	0.00709	0.13385	0.00936	0.11493	0.01719	0.11561	0.02195	0.13984	0.03982
0.09752	0.00916	0.13587	0.01171	0.11875	0.02084	0.12085	0.02578	0.14996	0.04568
0.09954	0.01139	0.13808	0.0147	0.12345	0.02521	0.12701	0.03038	0.16169	0.05186
0.10188	0.01422	0.14107	0.01849	0.12948	0.0306	0.13445	0.03556	0.1749	0.05811
0.10445	0.01791	0.14511	0.02336	0.13711	0.03673	0.14363	0.04144	0.1891	0.06454
0.10776	0.02289	0.15048	0.02915	0.14682	0.04352	0.15454	0.04744	0.20446	0.07214
0.11218	0.02938	0.1579	0.03587	0.15891	0.05012	0.16735	0.05331	0.22095	0.08167
0.11809	0.03776	0.16762	0.04301	0.17297	0.05599	0.1808	0.05867	0.23983	0.09467
0.12626	0.04826	0.18002	0.04971	0.18771	0.06096	0.19456	0.06473	0.2621	0.11014
0.13758	0.061	0.19436	0.05542	0.2027	0.06601	0.20908	0.07272	0.29182	0.12809
0.1533	0.07544	0.20952	0.05958	0.21762	0.07251	0.22538	0.08348	0.32994	0.14542
0.1738	0.09053	0.22471	0.06342	0.23352	0.08178	0.24686	0.09738	0.37624	0.15714
0.19929	0.10479	0.23994	0.0682	0.25405	0.09395	0.27465	0.11264	0.42483	0.16108
0.22827	0.11732	0.25705	0.07461	0.28005	0.10804	0.31008	0.12514	0.47166	0.15605
0.25809	0.12776	0.27771	0.0828	0.31305	0.12024	0.35017	0.13114	0.51263	0.14652
0.2871	0.13913	0.30301	0.08865	0.35127	0.12742	0.3907	0.12796	0.54553	0.13672
0.31194	0.1556	0.33108	0.08914	0.39011	0.12633	0.42615	0.11838	0.57334	0.1298
0.33581	0.18231	0.35695	0.08382	0.42551	0.11903	0.45416	0.10735	0.59743	0.13035
0.36081	0.22522	0.37821	0.07509	0.45447	0.11024	0.47703	0.09778	0.61826	0.13864
0.3912	0.28947	0.39419	0.06694	0.47851	0.1026	0.49422	0.09339
0.43971	0.384	0.40571	0.06184	0.4988	0.10033	0.50892	0.09334
0.51061	0.51315	0.41628	0.06069	0.51662	0.10246	0.52375	0.09921
0.63068	0.67806	0.426	0.06395	0.53526	0.11018
0.81313	0.86122	0.4373	0.07166
1.07055	1.04335	0.45158	0.08419
1.38864	1.20053
1.73625	1.3111

## Sheet: Fig 1e
After 10 cycles		After 100 cycles		After 200 cycles		After 300 cycles
τ (s)	γ(τ) (Ω)	τ (s)	γ(τ) (Ω)	τ (s)	γ(τ) (Ω)	τ (s)	γ(τ) (Ω)
1000.48	1.14346e-42	1000.48	1.03233e-42	1000.48	9.11763e-43	1000.48	1.53802e-42
982.206	2.44512e-42	982.206	2.20749e-42	982.206	1.94967e-42	982.206	3.28883e-42
964.263	5.21261e-42	964.263	4.70602e-42	964.263	4.1564e-42	964.263	7.01128e-42
946.648	1.10787e-41	946.648	1.0002e-41	946.648	8.83383e-42	946.648	1.49015e-41
929.355	2.34744e-41	929.355	2.1193e-41	929.355	1.87179e-41	929.355	3.15745e-41
912.377	4.95881e-41	912.377	4.47689e-41	912.377	3.95403e-41	912.377	6.6699e-41
895.71	1.04433e-40	895.71	9.42834e-41	895.71	8.32721e-41	895.71	1.40468e-40
879.347	2.19266e-40	879.347	1.97957e-40	879.347	1.74837e-40	879.347	2.94926e-40
863.284	4.58969e-40	863.284	4.14363e-40	863.284	3.6597e-40	863.284	6.1734e-40
847.513	9.57789e-40	847.513	8.64705e-40	847.513	7.63716e-40	847.513	1.28828e-39
832.031	1.99266e-39	832.031	1.799e-39	832.031	1.58889e-39	832.031	2.68024e-39
816.832	4.13305e-39	816.832	3.73138e-39	816.832	3.29559e-39	816.832	5.55921e-39
801.91	8.54644e-39	801.91	7.71585e-39	801.91	6.81472e-39	801.91	1.14955e-38
787.261	1.76188e-38	787.261	1.59065e-38	787.261	1.40488e-38	787.261	2.36983e-38
772.879	3.62111e-38	772.879	3.26919e-38	772.879	2.88738e-38	772.879	4.87062e-38
758.76	7.41966e-38	758.76	6.69858e-38	758.76	5.91625e-38	758.76	9.97989e-38
744.899	1.51566e-37	744.899	1.36836e-37	744.899	1.20855e-37	744.899	2.03866e-37
731.291	3.08671e-37	731.291	2.78673e-37	731.291	2.46126e-37	731.291	4.15181e-37
717.932	6.26709e-37	717.932	5.65801e-37	717.932	4.99722e-37	717.932	8.42961e-37
704.817	1.26856e-36	704.817	1.14527e-36	704.817	1.01152e-36	704.817	1.70629e-36
691.942	2.55996e-36	691.942	2.31117e-36	691.942	2.04124e-36	691.942	3.4433e-36
679.301	5.15027e-36	679.301	4.64974e-36	679.301	4.10669e-36	679.301	6.92743e-36
666.892	1.03301e-35	666.892	9.32613e-36	666.892	8.23693e-36	666.892	1.38946e-35
654.709	2.06563e-35	654.709	1.86488e-35	654.709	1.64708e-35	654.709	2.7784e-35
642.749	4.11791e-35	642.749	3.71771e-35	642.749	3.28352e-35	642.749	5.53884e-35
631.008	8.18424e-35	631.008	7.38884e-35	631.008	6.5259e-35	631.008	1.10083e-34
619.48	1.62164e-34	619.48	1.46404e-34	619.48	1.29306e-34	619.48	2.18121e-34
608.164	3.20337e-34	608.164	2.89205e-34	608.164	2.55429e-34	608.164	4.30873e-34
597.054	6.30864e-34	597.054	5.69553e-34	597.054	5.03035e-34	597.054	8.48551e-34
586.147	1.23863e-33	586.147	1.11825e-33	586.147	9.87649e-34	586.147	1.66603e-33
575.439	2.42449e-33	575.439	2.18886e-33	575.439	1.93323e-33	575.439	3.26109e-33
564.927	4.73126e-33	564.927	4.27145e-33	564.927	3.77258e-33	564.927	6.36383e-33
554.607	9.20468e-33	554.607	8.31011e-33	554.607	7.33957e-33	554.607	1.23808e-32
544.476	1.78532e-32	544.476	1.61181e-32	544.476	1.42357e-32	544.476	2.40136e-32
534.529	3.45223e-32	534.529	3.11672e-32	534.529	2.75272e-32	534.529	4.64346e-32
524.765	6.65518e-32	524.765	6.00839e-32	524.765	5.30667e-32	524.765	8.95162e-32
515.178	1.27907e-31	515.178	1.15476e-31	515.178	1.0199e-31	515.178	1.72043e-31
505.767	2.45079e-31	505.767	2.21261e-31	505.767	1.9542e-31	505.767	3.29646e-31
496.528	4.68159e-31	496.528	4.22661e-31	496.528	3.73298e-31	496.528	6.29703e-31
487.457	8.91573e-31	487.457	8.04924e-31	487.457	7.10917e-31	487.457	1.19922e-30
478.552	1.69276e-30	478.552	1.52825e-30	478.552	1.34976e-30	478.552	2.27687e-30
469.81	3.20413e-30	469.81	2.89274e-30	469.81	2.55489e-30	469.81	4.30975e-30
461.228	6.04646e-30	461.228	5.45883e-30	461.228	4.82129e-30	461.228	8.13286e-30
452.802	1.13754e-29	452.802	1.02699e-29	452.802	9.07048e-30	452.802	1.53006e-29
444.531	2.13359e-29	444.531	1.92623e-29	444.531	1.70127e-29	444.531	2.8698e-29
436.41	3.98959e-29	436.41	3.60186e-29	436.41	3.1812e-29	436.41	5.36625e-29
428.438	7.43743e-29	428.438	6.71462e-29	428.438	5.93042e-29	428.438	1.00038e-28
420.611	1.38227e-28	420.611	1.24793e-28	420.611	1.10219e-28	420.611	1.85924e-28
412.927	2.56117e-28	412.927	2.31226e-28	412.927	2.04221e-28	412.927	3.44493e-28
405.384	4.73109e-28	405.384	4.27129e-28	405.384	3.77245e-28	405.384	6.3636e-28
397.978	8.71282e-28	397.978	7.86605e-28	397.978	6.94738e-28	397.978	1.17193e-27
390.708	1.59968e-27	390.708	1.44421e-27	390.708	1.27554e-27	390.708	2.15166e-27
383.571	2.92807e-27	383.571	2.6435e-27	383.571	2.33477e-27	383.571	3.93843e-27
376.564	5.34327e-27	376.564	4.82398e-27	376.564	4.26059e-27	376.564	7.18702e-27
369.685	9.72094e-27	369.685	8.7762e-27	369.685	7.75123e-27	369.685	1.30753e-26
362.931	1.76313e-26	362.931	1.59178e-26	362.931	1.40588e-26	362.931	2.37152e-26
356.301	3.18815e-26	356.301	2.8783e-26	356.301	2.54215e-26	356.301	4.28825e-26
349.793	5.74734e-26	349.793	5.18878e-26	349.793	4.58279e-26	349.793	7.73052e-26
343.403	1.03293e-25	343.403	9.32546e-26	343.403	8.23634e-26	343.403	1.38936e-25
337.129	1.85077e-25	337.129	1.6709e-25	337.129	1.47576e-25	337.129	2.4894e-25
330.971	3.30605e-25	330.971	2.98474e-25	330.971	2.63616e-25	330.971	4.44683e-25
324.925	5.88764e-25	324.925	5.31544e-25	324.925	4.69465e-25	324.925	7.91923e-25
318.989	1.04532e-24	318.989	9.4373e-25	318.989	8.33512e-25	318.989	1.40602e-24
313.162	1.85026e-24	313.162	1.67044e-24	313.162	1.47535e-24	313.162	2.48872e-24
307.441	3.26508e-24	307.441	2.94776e-24	307.441	2.60349e-24	307.441	4.39173e-24
301.825	5.7442e-24	301.825	5.18594e-24	301.825	4.58028e-24	301.825	7.7263e-24
296.311	1.00749e-23	296.311	9.09577e-24	296.311	8.03348e-24	296.311	1.35514e-23
290.898	1.76169e-23	290.898	1.59048e-23	290.898	1.40472e-23	290.898	2.36958e-23
285.584	3.07109e-23	285.584	2.77262e-23	285.584	2.44881e-23	285.584	4.1308e-23
280.367	5.33742e-23	280.367	4.8187e-23	280.367	4.25593e-23	280.367	7.17916e-23
275.245	9.24798e-23	275.245	8.34921e-23	275.245	7.37411e-23	275.245	1.24391e-22
270.217	1.59749e-22	270.217	1.44224e-22	270.217	1.2738e-22	270.217	2.14872e-22
265.281	2.75109e-22	265.281	2.48372e-22	265.281	2.19365e-22	265.281	3.70039e-22
260.435	4.72333e-22	260.435	4.26429e-22	260.435	3.76626e-22	260.435	6.35316e-22
255.677	8.08475e-22	255.677	7.29903e-22	255.677	6.44658e-22	255.677	1.08745e-21
251.006	1.37963e-21	251.006	1.24555e-21	251.006	1.10008e-21	251.006	1.85568e-21
246.421	2.3471e-21	246.421	2.119e-21	246.421	1.87152e-21	246.421	3.157e-21
241.919	3.98087e-21	241.919	3.59399e-21	241.919	3.17425e-21	241.919	5.35452e-21
237.5	6.73133e-21	237.5	6.07714e-21	237.5	5.36739e-21	237.5	9.05404e-21
233.161	1.13475e-20	233.161	1.02446e-20	233.161	9.04818e-21	233.161	1.5263e-20
228.902	1.9071e-20	228.902	1.72175e-20	228.902	1.52067e-20	228.902	2.56516e-20
224.72	3.19538e-20	224.72	2.88484e-20	224.72	2.54792e-20	224.72	4.29798e-20
220.615	5.33763e-20	220.615	4.81889e-20	220.615	4.25609e-20	220.615	7.17944e-20
216.585	8.88895e-20	216.585	8.02506e-20	216.585	7.08782e-20	216.585	1.19562e-19
212.629	1.4758e-19	212.629	1.33237e-19	212.629	1.17677e-19	212.629	1.98504e-19
208.744	2.44276e-19	208.744	2.20536e-19	208.744	1.9478e-19	208.744	3.28567e-19
204.931	4.03098e-19	204.931	3.63922e-19	204.931	3.2142e-19	204.931	5.42191e-19
201.187	6.63156e-19	201.187	5.98707e-19	201.187	5.28784e-19	201.187	8.91986e-19
197.512	1.08767e-18	197.512	9.81963e-19	197.512	8.6728e-19	197.512	1.46298e-18
193.904	1.7785e-18	193.904	1.60565e-18	193.904	1.41813e-18	193.904	2.39219e-18
190.362	2.89926e-18	190.362	2.61749e-18	190.362	2.31179e-18	190.362	3.89968e-18
186.884	4.7119e-18	186.884	4.25396e-18	186.884	3.75714e-18	186.884	6.33779e-18
183.47	7.63449e-18	183.47	6.89252e-18	183.47	6.08755e-18	183.47	1.02689e-17
180.119	1.23322e-17	180.119	1.11337e-17	180.119	9.83338e-18	180.119	1.65876e-17
176.828	1.98599e-17	176.828	1.79298e-17	176.828	1.58358e-17	176.828	2.67128e-17
173.598	3.18852e-17	173.598	2.87864e-17	173.598	2.54244e-17	173.598	4.28876e-17
170.427	5.10361e-17	170.427	4.60761e-17	170.427	4.06949e-17	170.427	6.86467e-17
167.313	8.14408e-17	167.313	7.35258e-17	167.313	6.49387e-17	167.313	1.09543e-16
164.257	1.29563e-16	164.257	1.16971e-16	164.257	1.0331e-16	164.257	1.74271e-16
161.256	2.05493e-16	161.256	1.85522e-16	161.256	1.63855e-16	161.256	2.76401e-16
158.31	3.2493e-16	158.31	2.93351e-16	158.31	2.5909e-16	158.31	4.37051e-16
155.418	5.12221e-16	155.418	4.62439e-16	155.418	4.08431e-16	155.418	6.88968e-16
152.579	8.05009e-16	152.579	7.26772e-16	152.579	6.41893e-16	152.579	1.08279e-15
149.792	1.26131e-15	149.792	1.13872e-15	149.792	1.00573e-15	149.792	1.69653e-15
147.056	1.97022e-15	147.056	1.77874e-15	147.056	1.571e-15	147.056	2.65007e-15
144.369	3.06822e-15	144.369	2.77003e-15	144.369	2.44652e-15	144.369	4.12695e-15
141.732	4.76359e-15	141.732	4.30062e-15	141.732	3.79835e-15	141.732	6.40732e-15
139.143	7.37322e-15	139.143	6.65663e-15	139.143	5.8792e-15	139.143	9.91744e-15
136.601	1.13777e-14	136.601	1.0272e-14	136.601	9.0723e-15	136.601	1.53038e-14
134.106	1.75037e-14	134.106	1.58026e-14	134.106	1.3957e-14	134.106	2.35436e-14
131.656	2.68461e-14	131.656	2.4237e-14	131.656	2.14064e-14	131.656	3.61097e-14
129.251	4.10495e-14	129.251	3.706e-14	129.251	3.27318e-14	129.251	5.52142e-14
126.889	6.25765e-14	126.889	5.64947e-14	126.889	4.98967e-14	126.889	8.41693e-14
124.571	9.5102e-14	124.571	8.58591e-14	124.571	7.58317e-14	124.571	1.27918e-13
122.296	1.44093e-13	122.296	1.30089e-13	122.296	1.14896e-13	122.296	1.93815e-13
120.062	2.17658e-13	120.062	1.96504e-13	120.062	1.73554e-13	120.062	2.92764e-13
117.868	3.27779e-13	117.868	2.95922e-13	117.868	2.61361e-13	117.868	4.40883e-13
115.715	4.92111e-13	115.715	4.44283e-13	115.715	3.92395e-13	115.715	6.61921e-13
113.601	7.36582e-13	113.601	6.64994e-13	113.601	5.87329e-13	113.601	9.9075e-13
111.526	1.09915e-12	111.526	9.92319e-13	111.526	8.76427e-13	111.526	1.47842e-12
109.489	1.63518e-12	109.489	1.47626e-12	109.489	1.30384e-12	109.489	2.19942e-12
107.489	2.42522e-12	107.489	2.18951e-12	107.489	1.9338e-12	107.489	3.26208e-12
105.525	3.58603e-12	105.525	3.23749e-12	105.525	2.85939e-12	105.525	4.82344e-12
103.597	5.28629e-12	103.597	4.77251e-12	103.597	4.21513e-12	103.597	7.11041e-12
101.705	7.769e-12	101.705	7.01392e-12	101.705	6.19476e-12	101.705	1.04498e-11
99.8469	1.1383e-11	99.8469	1.02766e-11	99.8469	9.07642e-12	99.8469	1.53108e-11
98.0229	1.66273e-11	98.0229	1.50112e-11	98.0229	1.32581e-11	98.0229	2.23648e-11
96.2323	2.42138e-11	96.2323	2.18604e-11	96.2323	1.93073e-11	96.2323	3.25692e-11
94.4743	3.51545e-11	94.4743	3.17377e-11	94.4743	2.80311e-11	94.4743	4.72851e-11
92.7485	5.08832e-11	92.7485	4.59376e-11	92.7485	4.05726e-11	92.7485	6.84414e-11
91.0541	7.3425e-11	91.0541	6.62885e-11	91.0541	5.85467e-11	91.0541	9.87617e-11
89.3908	1.05631e-10	89.3908	9.53639e-11	89.3908	8.42264e-11	89.3908	1.42081e-10
87.7578	1.515e-10	87.7578	1.36775e-10	87.7578	1.20801e-10	87.7578	2.03778e-10
86.1547	2.16626e-10	86.1547	1.9557e-10	86.1547	1.7273e-10	86.1547	2.91377e-10
84.5808	3.08805e-10	84.5808	2.7879e-10	84.5808	2.4623e-10	84.5808	4.15364e-10
83.0357	4.38868e-10	83.0357	3.96211e-10	83.0357	3.49938e-10	83.0357	5.90309e-10
81.5188	6.21813e-10	81.5188	5.61374e-10	81.5188	4.95811e-10	81.5188	8.36384e-10
80.0296	8.78339e-10	80.0296	7.92964e-10	80.0296	7.00355e-10	80.0296	1.18143e-09
78.5676	1.23692e-09	78.5676	1.11669e-09	78.5676	9.8627e-10	78.5676	1.66374e-09
77.1324	1.73658e-09	77.1324	1.56778e-09	77.1324	1.38468e-09	77.1324	2.33583e-09
75.7233	2.43067e-09	75.7233	2.1944e-09	75.7233	1.93812e-09	75.7233	3.26943e-09
74.34	3.39181e-09	74.34	3.06212e-09	74.34	2.70449e-09	74.34	4.56225e-09
72.982	4.71862e-09	72.982	4.25994e-09	72.982	3.76243e-09	72.982	6.34691e-09
71.6488	6.54446e-09	71.6488	5.9083e-09	71.6488	5.21827e-09	71.6488	8.80282e-09
70.3399	9.04918e-09	70.3399	8.16952e-09	70.3399	7.21542e-09	70.3399	1.21719e-08
69.0549	1.24744e-08	69.0549	1.12618e-08	69.0549	9.94654e-09	69.0549	1.67791e-08
67.7935	1.71439e-08	67.7935	1.54773e-08	67.7935	1.36697e-08	67.7935	2.30599e-08
66.555	2.34894e-08	66.555	2.12059e-08	66.555	1.87293e-08	66.555	3.15953e-08
65.3392	3.20858e-08	65.3392	2.89666e-08	65.3392	2.55836e-08	65.3392	4.31581e-08
64.1456	4.36948e-08	64.1456	3.94469e-08	64.1456	3.484e-08	64.1456	5.87733e-08
62.9738	5.93229e-08	62.9738	5.35556e-08	62.9738	4.73009e-08	62.9738	7.97946e-08
61.8234	8.02956e-08	61.8234	7.24892e-08	61.8234	6.40233e-08	61.8234	1.08005e-07
60.694	1.08352e-07	60.694	9.78178e-08	60.694	8.63938e-08	60.694	1.45744e-07
59.5853	1.45767e-07	59.5853	1.31595e-07	59.5853	1.16226e-07	59.5853	1.96071e-07
58.4967	1.95505e-07	58.4967	1.76497e-07	58.4967	1.55884e-07	58.4967	2.62974e-07
57.4281	2.61417e-07	57.4281	2.35999e-07	57.4281	2.08437e-07	57.4281	3.51632e-07
56.379	3.48487e-07	56.379	3.14602e-07	56.379	2.7786e-07	56.379	4.6875e-07
55.3491	4.63142e-07	55.3491	4.18107e-07	55.3491	3.69278e-07	55.3491	6.22976e-07
54.338	6.13649e-07	54.338	5.53977e-07	54.338	4.89279e-07	54.338	8.25425e-07
53.3454	8.10591e-07	53.3454	7.31765e-07	53.3454	6.46305e-07	53.3454	1.09034e-06
52.3709	1.06748e-06	52.3709	9.63671e-07	52.3709	8.51127e-07	52.3709	1.43589e-06
51.4142	1.40151e-06	51.4142	1.26521e-06	51.4142	1.11745e-06	51.4142	1.8852e-06
50.4749	1.83446e-06	50.4749	1.65605e-06	50.4749	1.46264e-06	50.4749	2.46758e-06
49.5529	2.39386e-06	49.5529	2.16103e-06	49.5529	1.90865e-06	49.5529	3.22005e-06
48.6476	3.11434e-06	48.6476	2.81141e-06	48.6476	2.48308e-06	48.6476	4.1892e-06
47.7589	4.03933e-06	47.7589	3.64642e-06	47.7589	3.22057e-06	47.7589	5.43346e-06
46.8865	5.22313e-06	46.8865	4.71503e-06	46.8865	4.16438e-06	46.8865	7.02586e-06
46.03	6.73333e-06	46.03	6.07827e-06	46.03	5.36842e-06	46.03	9.05732e-06
45.1891	8.65378e-06	45.1891	7.81184e-06	45.1891	6.89953e-06	45.1891	1.16407e-05
44.3636	1.10882e-05	44.3636	1.00093e-05	44.3636	8.84036e-06	44.3636	1.49153e-05
43.5532	1.41642e-05	43.5532	1.27859e-05	43.5532	1.12927e-05	43.5532	1.90531e-05
42.7576	1.80385e-05	42.7576	1.62831e-05	42.7576	1.43815e-05	42.7576	2.42649e-05
41.9765	2.29027e-05	41.9765	2.06737e-05	41.9765	1.82594e-05	41.9765	3.08083e-05
41.2096	2.89902e-05	41.2096	2.61686e-05	41.2096	2.31125e-05	41.2096	3.89973e-05
40.4568	3.65843e-05	40.4568	3.30231e-05	40.4568	2.91666e-05	40.4568	4.92131e-05
39.7178	4.60274e-05	39.7178	4.15465e-05	39.7178	3.66946e-05	39.7178	6.19164e-05
38.9922	5.7732e-05	38.9922	5.2111e-05	38.9922	4.60254e-05	38.9922	7.76621e-05
38.2799	7.21931e-05	38.2799	6.51633e-05	38.2799	5.75534e-05	38.2799	9.71161e-05
37.5806	9.00023e-05	37.5806	8.12371e-05	37.5806	7.17502e-05	37.5806	0.000121075
36.8941	0.000111864	36.8941	0.000100968	36.8941	8.91772e-05	36.8941	0.000150485
36.2201	0.000138614	36.2201	0.000125111	36.2201	0.0001105	36.2201	0.000186472
35.5585	0.000171239	35.5585	0.000154555	35.5585	0.000136506	35.5585	0.000230364
34.9089	0.000210901	34.9089	0.000190349	34.9089	0.00016812	34.9089	0.000283723
34.2712	0.000258961	34.2712	0.000233721	34.2712	0.000206428	34.2712	0.000348381
33.6451	0.000317008	33.6451	0.000286105	33.6451	0.000252694	33.6451	0.000426477
33.0305	0.000386889	33.0305	0.000349166	33.0305	0.000308392	33.0305	0.000520497
32.4271	0.000470743	32.4271	0.000424834	32.4271	0.000375224	32.4271	0.000633318
31.8347	0.000571035	31.8347	0.000515333	31.8347	0.000455155	31.8347	0.000768258
31.2532	0.000690595	31.2532	0.000623213	31.2532	0.000550439	31.2532	0.000929126
30.6822	0.000832657	30.6822	0.000751393	30.6822	0.000663652	30.6822	0.00112
30.1217	0.001	30.1217	0.000903191	30.1217	0.000797725	30.1217	0.00135
29.5715	0.0012	29.5715	0.00108	29.5715	0.000955978	29.5715	0.00161
29.0312	0.00143	29.0312	0.00129	29.0312	0.00114	29.0312	0.00193
28.5009	0.00171	28.5009	0.00154	28.5009	0.00136	28.5009	0.0023
27.9803	0.00203	27.9803	0.00183	27.9803	0.00162	27.9803	0.00273
27.4691	0.0024	27.4691	0.00217	27.4691	0.00191	27.4691	0.00323
26.9673	0.00283	26.9673	0.00256	26.9673	0.00226	26.9673	0.00381
26.4747	0.00333	26.4747	0.00301	26.4747	0.00266	26.4747	0.00449
25.9911	0.00391	25.9911	0.00353	25.9911	0.00312	25.9911	0.00526
25.5162	0.00458	25.5162	0.00413	25.5162	0.00365	25.5162	0.00616
25.0501	0.00534	25.0501	0.00481	25.0501	0.00425	25.0501	0.00718
24.5925	0.00621	24.5925	0.0056	24.5925	0.00494	24.5925	0.00835
24.1432	0.00719	24.1432	0.00649	24.1432	0.00573	24.1432	0.00968
23.7022	0.00831	23.7022	0.0075	23.7022	0.00662	23.7022	0.01119
23.2692	0.00958	23.2692	0.00864	23.2692	0.00763	23.2692	0.01289
22.8441	0.011	22.8441	0.00992	22.8441	0.00876	22.8441	0.01481
22.4268	0.0126	22.4268	0.01136	22.4268	0.01004	22.4268	0.01697
22.0171	0.01439	22.0171	0.01297	22.0171	0.01146	22.0171	0.01937
21.6149	0.01638	21.6149	0.01477	21.6149	0.01305	21.6149	0.02206
21.2201	0.0186	21.2201	0.01676	21.2201	0.01481	21.2201	0.02504
20.8324	0.02105	20.8324	0.01897	20.8324	0.01676	20.8324	0.02834
20.4519	0.02375	20.4519	0.0214	20.4519	0.0189	20.4519	0.03198
20.0783	0.02671	20.0783	0.02407	20.0783	0.02126	20.0783	0.03597
19.7115	0.02996	19.7115	0.027	19.7115	0.02385	19.7115	0.04035
19.3514	0.03351	19.3514	0.03018	19.3514	0.02666	19.3514	0.04513
18.9979	0.03736	18.9979	0.03365	18.9979	0.02972	18.9979	0.05032
18.6508	0.04153	18.6508	0.0374	18.6508	0.03304	18.6508	0.05594
18.3101	0.04603	18.3101	0.04145	18.3101	0.03661	18.3101	0.06201
17.9756	0.05086	17.9756	0.0458	17.9756	0.04045	17.9756	0.06853
17.6472	0.05604	17.6472	0.05045	17.6472	0.04457	17.6472	0.07552
17.3249	0.06157	17.3249	0.05542	17.3249	0.04895	17.3249	0.08298
17.0084	0.06744	17.0084	0.06069	17.0084	0.05361	17.0084	0.0909
16.6977	0.07366	16.6977	0.06627	16.6977	0.05854	16.6977	0.09929
16.3926	0.08021	16.3926	0.07216	16.3926	0.06374	16.3926	0.10815
16.0932	0.08709	16.0932	0.07834	16.0932	0.0692	16.0932	0.11745
15.7992	0.0943	15.7992	0.08479	15.7992	0.07491	15.7992	0.12718
15.5106	0.1018	15.5106	0.09152	15.5106	0.08085	15.5106	0.13732
15.2272	0.10958	15.2272	0.0985	15.2272	0.08701	15.2272	0.14785
14.9491	0.11762	14.9491	0.1057	14.9491	0.09338	14.9491	0.15872
14.676	0.12589	14.676	0.11311	14.676	0.09993	14.676	0.16992
14.4079	0.13436	14.4079	0.12069	14.4079	0.10663	14.4079	0.18139
14.1447	0.14299	14.1447	0.12842	14.1447	0.11345	14.1447	0.19309
13.8863	0.15176	13.8863	0.13625	13.8863	0.12038	13.8863	0.20498
13.6326	0.1606	13.6326	0.14417	13.6326	0.12737	13.6326	0.21698
13.3836	0.1695	13.3836	0.15211	13.3836	0.13439	13.3836	0.22906
13.1391	0.17839	13.1391	0.16006	13.1391	0.14142	13.1391	0.24115
12.8991	0.18723	12.8991	0.16796	12.8991	0.1484	12.8991	0.25318
12.6634	0.19598	12.6634	0.17577	12.6634	0.1553	12.6634	0.2651
12.4321	0.20458	12.4321	0.18345	12.4321	0.16209	12.4321	0.27683
12.205	0.21299	12.205	0.19096	12.205	0.16873	12.205	0.28832
11.982	0.22116	11.982	0.19825	11.982	0.17518	11.982	0.29949
11.7631	0.22904	11.7631	0.20529	11.7631	0.18141	11.7631	0.31028
11.5482	0.23658	11.5482	0.21204	11.5482	0.18738	11.5482	0.32064
11.3373	0.24375	11.3373	0.21846	11.3373	0.19305	11.3373	0.3305
11.1302	0.2505	11.1302	0.22451	11.1302	0.19841	11.1302	0.33981
10.9268	0.25679	10.9268	0.23018	10.9268	0.20342	10.9268	0.34852
10.7272	0.26259	10.7272	0.23542	10.7272	0.20806	10.7272	0.35658
10.5313	0.26787	10.5313	0.24022	10.5313	0.2123	10.5313	0.36394
10.3389	0.2726	10.3389	0.24455	10.3389	0.21614	10.3389	0.37059
10.15	0.27677	10.15	0.24841	10.15	0.21956	10.15	0.37648
9.9646	0.28036	9.9646	0.25179	9.9646	0.22256	9.9646	0.38159
9.78257	0.28336	9.78257	0.25468	9.78257	0.22512	9.78257	0.38592
9.60386	0.28576	9.60386	0.25708	9.60386	0.22725	9.60386	0.38944
9.42842	0.28756	9.42842	0.259	9.42842	0.22895	9.42842	0.39216
9.25618	0.28876	9.25618	0.26045	9.25618	0.23023	9.25618	0.39409
9.08709	0.28938	9.08709	0.26144	9.08709	0.23111	9.08709	0.39522
8.92109	0.28944	8.92109	0.26198	8.92109	0.2316	8.92109	0.39559
8.75812	0.28894	8.75812	0.26211	8.75812	0.23172	8.75812	0.39521
8.59813	0.28791	8.59813	0.26184	8.59813	0.23149	8.59813	0.39411
8.44106	0.28637	8.44106	0.26121	8.44106	0.23093	8.44106	0.39233
8.28686	0.28436	8.28686	0.26024	8.28686	0.23007	8.28686	0.38989
8.13547	0.2819	8.13547	0.25896	8.13547	0.22894	8.13547	0.38683
7.98686	0.27903	7.98686	0.2574	7.98686	0.22756	7.98686	0.38321
7.84095	0.27578	7.84095	0.25561	7.84095	0.22597	7.84095	0.37906
7.69772	0.27219	7.69772	0.2536	7.69772	0.2242	7.69772	0.37443
7.5571	0.26828	7.5571	0.25142	7.5571	0.22226	7.5571	0.36936
7.41904	0.26411	7.41904	0.24909	7.41904	0.2202	7.41904	0.36391
7.28351	0.25969	7.28351	0.24664	7.28351	0.21802	7.28351	0.35811
7.15046	0.25507	7.15046	0.2441	7.15046	0.21577	7.15046	0.35201
7.01984	0.25028	7.01984	0.24149	7.01984	0.21346	7.01984	0.34565
6.8916	0.24534	6.8916	0.23884	6.8916	0.2111	6.8916	0.33908
6.7657	0.2403	6.7657	0.23616	6.7657	0.20872	6.7657	0.33233
6.64211	0.23516	6.64211	0.23347	6.64211	0.20633	6.64211	0.32544
6.52077	0.22997	6.52077	0.23079	6.52077	0.20393	6.52077	0.31844
6.40165	0.22473	6.40165	0.22811	6.40165	0.20155	6.40165	0.31135
6.28471	0.21948	6.28471	0.22545	6.28471	0.19917	6.28471	0.30422
6.1699	0.21421	6.1699	0.2228	6.1699	0.19681	6.1699	0.29705
6.05719	0.20896	6.05719	0.22017	6.05719	0.19446	6.05719	0.28987
5.94653	0.20373	5.94653	0.21754	5.94653	0.19212	5.94653	0.28269
5.8379	0.19852	5.8379	0.21493	5.8379	0.18978	5.8379	0.27553
5.73126	0.19336	5.73126	0.2123	5.73126	0.18744	5.73126	0.2684
5.62656	0.18823	5.62656	0.20966	5.62656	0.18508	5.62656	0.26131
5.52377	0.18315	5.52377	0.20699	5.52377	0.1827	5.52377	0.25426
5.42287	0.17811	5.42287	0.20427	5.42287	0.18027	5.42287	0.24725
5.3238	0.17312	5.3238	0.2015	5.3238	0.1778	5.3238	0.24029
5.22655	0.16817	5.22655	0.19865	5.22655	0.17525	5.22655	0.23337
5.13107	0.16326	5.13107	0.19571	5.13107	0.17263	5.13107	0.22651
5.03734	0.15839	5.03734	0.19266	5.03734	0.16992	5.03734	0.21968
4.94531	0.15356	4.94531	0.1895	4.94531	0.16711	4.94531	0.2129
4.85497	0.14876	4.85497	0.1862	4.85497	0.16418	4.85497	0.20617
4.76628	0.144	4.76628	0.18276	4.76628	0.16112	4.76628	0.19947
4.67921	0.13926	4.67921	0.17918	4.67921	0.15793	4.67921	0.19281
4.59374	0.13454	4.59374	0.17543	4.59374	0.15461	4.59374	0.18618
4.50982	0.12985	4.50982	0.17152	4.50982	0.15114	4.50982	0.17959
4.42743	0.12519	4.42743	0.16744	4.42743	0.14753	4.42743	0.17303
4.34655	0.12055	4.34655	0.1632	4.34655	0.14378	4.34655	0.16651
4.26715	0.11593	4.26715	0.1588	4.26715	0.13988	4.26715	0.16003
4.1892	0.11134	4.1892	0.15424	4.1892	0.13585	4.1892	0.1536
4.11267	0.10678	4.11267	0.14953	4.11267	0.13169	4.11267	0.14721
4.03754	0.10225	4.03754	0.14468	4.03754	0.1274	4.03754	0.14087
3.96378	0.09776	3.96378	0.13971	3.96378	0.12301	3.96378	0.1346
3.89137	0.09331	3.89137	0.13462	3.89137	0.11852	3.89137	0.12839
3.82029	0.08891	3.82029	0.12944	3.82029	0.11395	3.82029	0.12225
3.7505	0.08457	3.7505	0.12418	3.7505	0.10931	3.7505	0.11621
3.68198	0.08029	3.68198	0.11887	3.68198	0.10462	3.68198	0.11025
3.61472	0.07608	3.61472	0.11351	3.61472	0.0999	3.61472	0.1044
3.54869	0.07194	3.54869	0.10814	3.54869	0.09517	3.54869	0.09867
3.48386	0.06789	3.48386	0.10277	3.48386	0.09044	3.48386	0.09306
3.42022	0.06394	3.42022	0.09743	3.42022	0.08573	3.42022	0.08759
3.35774	0.06008	3.35774	0.09213	3.35774	0.08106	3.35774	0.08226
3.2964	0.05633	3.2964	0.0869	3.2964	0.07645	3.2964	0.07708
3.23618	0.0527	3.23618	0.08175	3.23618	0.07192	3.23618	0.07207
3.17706	0.04918	3.17706	0.0767	3.17706	0.06748	3.17706	0.06723
3.11903	0.0458	3.11903	0.07178	3.11903	0.06314	3.11903	0.06257
3.06205	0.04254	3.06205	0.06699	3.06205	0.05893	3.06205	0.0581
3.00611	0.03942	3.00611	0.06235	3.00611	0.05484	3.00611	0.05381
2.9512	0.03644	2.9512	0.05788	2.9512	0.05091	2.9512	0.04972
2.89728	0.0336	2.89728	0.05358	2.89728	0.04712	2.89728	0.04582
2.84436	0.0309	2.84436	0.04946	2.84436	0.0435	2.84436	0.04212
2.7924	0.02834	2.7924	0.04553	2.7924	0.04004	2.7924	0.03863
2.74138	0.02593	2.74138	0.04179	2.74138	0.03675	2.74138	0.03533
2.69131	0.02366	2.69131	0.03825	2.69131	0.03364	2.69131	0.03223
2.64214	0.02154	2.64214	0.03492	2.64214	0.0307	2.64214	0.02932
2.59387	0.01955	2.59387	0.03178	2.59387	0.02795	2.59387	0.02661
2.54649	0.0177	2.54649	0.02885	2.54649	0.02536	2.54649	0.02408
2.49997	0.01598	2.49997	0.02611	2.49997	0.02295	2.49997	0.02173
2.4543	0.01439	2.4543	0.02356	2.4543	0.02071	2.4543	0.01956
2.40947	0.01292	2.40947	0.0212	2.40947	0.01864	2.40947	0.01756
2.36545	0.01157	2.36545	0.01903	2.36545	0.01672	2.36545	0.01572
2.32224	0.01034	2.32224	0.01703	2.32224	0.01496	2.32224	0.01404
2.27982	0.00921	2.27982	0.01519	2.27982	0.01335	2.27982	0.0125
2.23817	0.00818	2.23817	0.01352	2.23817	0.01188	2.23817	0.0111
2.19728	0.00726	2.19728	0.01201	2.19728	0.01055	2.19728	0.00984
2.15714	0.00642	2.15714	0.01063	2.15714	0.00934	2.15714	0.00869
2.11774	0.00567	2.11774	0.0094	2.11774	0.00825	2.11774	0.00766
2.07905	0.00499	2.07905	0.00829	2.07905	0.00727	2.07905	0.00674
2.04107	0.0044	2.04107	0.0073	2.04107	0.00639	2.04107	0.00592
2.00378	0.00387	2.00378	0.00642	2.00378	0.00561	2.00378	0.00519
1.96718	0.0034	1.96718	0.00565	1.96718	0.00493	1.96718	0.00455
1.93124	0.00299	1.93124	0.00497	1.93124	0.00432	1.93124	0.00398
1.89596	0.00264	1.89596	0.00438	1.89596	0.0038	1.89596	0.00349
1.86133	0.00234	1.86133	0.00387	1.86133	0.00334	1.86133	0.00306
1.82733	0.00209	1.82733	0.00345	1.82733	0.00295	1.82733	0.0027
1.79394	0.00188	1.79394	0.00309	1.79394	0.00263	1.79394	0.00239
1.76117	0.00172	1.76117	0.0028	1.76117	0.00236	1.76117	0.00213
1.729	0.00159	1.729	0.00257	1.729	0.00214	1.729	0.00193
1.69742	0.0015	1.69742	0.00241	1.69742	0.00197	1.69742	0.00177
1.66641	0.00145	1.66641	0.0023	1.66641	0.00185	1.66641	0.00165
1.63597	0.00143	1.63597	0.00224	1.63597	0.00177	1.63597	0.00157
1.60608	0.00144	1.60608	0.00224	1.60608	0.00174	1.60608	0.00153
1.57674	0.00149	1.57674	0.00229	1.57674	0.00174	1.57674	0.00152
1.54794	0.00157	1.54794	0.00239	1.54794	0.00179	1.54794	0.00156
1.51966	0.00168	1.51966	0.00254	1.51966	0.00188	1.51966	0.00162
1.4919	0.00183	1.4919	0.00275	1.4919	0.002	1.4919	0.00173
1.46464	0.00201	1.46464	0.003	1.46464	0.00217	1.46464	0.00187
1.43789	0.00223	1.43789	0.00332	1.43789	0.00238	1.43789	0.00204
1.41162	0.00249	1.41162	0.00368	1.41162	0.00262	1.41162	0.00226
1.38583	0.00278	1.38583	0.00411	1.38583	0.00291	1.38583	0.00251
1.36052	0.00311	1.36052	0.0046	1.36052	0.00325	1.36052	0.0028
1.33566	0.00349	1.33566	0.00514	1.33566	0.00363	1.33566	0.00314
1.31126	0.00391	1.31126	0.00576	1.31126	0.00406	1.31126	0.00352
1.28731	0.00438	1.28731	0.00644	1.28731	0.00453	1.28731	0.00395
1.26379	0.00489	1.26379	0.00719	1.26379	0.00506	1.26379	0.00443
1.24071	0.00545	1.24071	0.00802	1.24071	0.00564	1.24071	0.00495
1.21804	0.00606	1.21804	0.00892	1.21804	0.00628	1.21804	0.00554
1.19579	0.00673	1.19579	0.0099	1.19579	0.00697	1.19579	0.00618
1.17395	0.00745	1.17395	0.01095	1.17395	0.00772	1.17395	0.00688
1.1525	0.00822	1.1525	0.01209	1.1525	0.00853	1.1525	0.00764
1.13145	0.00904	1.13145	0.01331	1.13145	0.0094	1.13145	0.00847
1.11078	0.00992	1.11078	0.01461	1.11078	0.01033	1.11078	0.00936
1.09049	0.01086	1.09049	0.01599	1.09049	0.01132	1.09049	0.01033
1.07057	0.01184	1.07057	0.01745	1.07057	0.01236	1.07057	0.01136
1.05101	0.01288	1.05101	0.01898	1.05101	0.01347	1.05101	0.01247
1.03181	0.01397	1.03181	0.02059	1.03181	0.01464	1.03181	0.01366
1.01296	0.0151	1.01296	0.02226	1.01296	0.01586	1.01296	0.01491
0.99445	0.01628	0.99445	0.02401	0.99445	0.01713	0.99445	0.01625
0.97629	0.01749	0.97629	0.02581	0.97629	0.01845	0.97629	0.01766
0.95845	0.01874	0.95845	0.02766	0.95845	0.01981	0.95845	0.01915
0.94094	0.02001	0.94094	0.02956	0.94094	0.02122	0.94094	0.02071
0.92376	0.02131	0.92376	0.03149	0.92376	0.02266	0.92376	0.02235
0.90688	0.02262	0.90688	0.03345	0.90688	0.02413	0.90688	0.02406
0.89031	0.02394	0.89031	0.03542	0.89031	0.02562	0.89031	0.02584
0.87405	0.02525	0.87405	0.0374	0.87405	0.02713	0.87405	0.02769
0.85808	0.02656	0.85808	0.03937	0.85808	0.02865	0.85808	0.02961
0.84241	0.02786	0.84241	0.04132	0.84241	0.03016	0.84241	0.03159
0.82702	0.02912	0.82702	0.04323	0.82702	0.03167	0.82702	0.03363
0.81191	0.03036	0.81191	0.0451	0.81191	0.03316	0.81191	0.03572
0.79708	0.03154	0.79708	0.04692	0.79708	0.03463	0.79708	0.03786
0.78252	0.03268	0.78252	0.04866	0.78252	0.03606	0.78252	0.04004
0.76822	0.03375	0.76822	0.05031	0.76822	0.03745	0.76822	0.04225
0.75419	0.03475	0.75419	0.05187	0.75419	0.0388	0.75419	0.0445
0.74041	0.03567	0.74041	0.05332	0.74041	0.04008	0.74041	0.04677
0.72689	0.03651	0.72689	0.05465	0.72689	0.0413	0.72689	0.04905
0.71361	0.03725	0.71361	0.05585	0.71361	0.04244	0.71361	0.05134
0.70057	0.03789	0.70057	0.05691	0.70057	0.0435	0.70057	0.05363
0.68777	0.03842	0.68777	0.05782	0.68777	0.04448	0.68777	0.05592
0.67521	0.03885	0.67521	0.05858	0.67521	0.04536	0.67521	0.05818
0.66287	0.03916	0.66287	0.05918	0.66287	0.04615	0.66287	0.06041
0.65076	0.03935	0.65076	0.05961	0.65076	0.04684	0.65076	0.06261
0.63888	0.03942	0.63888	0.05988	0.63888	0.04742	0.63888	0.06477
0.62721	0.03937	0.62721	0.05998	0.62721	0.0479	0.62721	0.06687
0.61575	0.0392	0.61575	0.05992	0.61575	0.04827	0.61575	0.0689
0.6045	0.03891	0.6045	0.05969	0.6045	0.04854	0.6045	0.07086
0.59346	0.03851	0.59346	0.05931	0.59346	0.0487	0.59346	0.07274
0.58262	0.03799	0.58262	0.05877	0.58262	0.04876	0.58262	0.07453
0.57197	0.03737	0.57197	0.05808	0.57197	0.04871	0.57197	0.07621
0.56152	0.03665	0.56152	0.05726	0.56152	0.04857	0.56152	0.07779
0.55127	0.03583	0.55127	0.05631	0.55127	0.04834	0.55127	0.07926
0.5412	0.03492	0.5412	0.05524	0.5412	0.04801	0.5412	0.0806
0.53131	0.03394	0.53131	0.05407	0.53131	0.04761	0.53131	0.08181
0.5216	0.03288	0.5216	0.0528	0.5216	0.04712	0.5216	0.08289
0.51207	0.03175	0.51207	0.05146	0.51207	0.04657	0.51207	0.08384
0.50272	0.03057	0.50272	0.05005	0.50272	0.04596	0.50272	0.08464
0.49354	0.02935	0.49354	0.04859	0.49354	0.04529	0.49354	0.0853
0.48452	0.02809	0.48452	0.0471	0.48452	0.04458	0.48452	0.08583
0.47567	0.0268	0.47567	0.04559	0.47567	0.04383	0.47567	0.08621
0.46698	0.02549	0.46698	0.04407	0.46698	0.04305	0.46698	0.08645
0.45845	0.02417	0.45845	0.04256	0.45845	0.04224	0.45845	0.08656
0.45007	0.02285	0.45007	0.04108	0.45007	0.04143	0.45007	0.08653
0.44185	0.02154	0.44185	0.03963	0.44185	0.04061	0.44185	0.08639
0.43378	0.02024	0.43378	0.03823	0.43378	0.03979	0.43378	0.08614
0.42586	0.01896	0.42586	0.03689	0.42586	0.03899	0.42586	0.08578
0.41808	0.01771	0.41808	0.03563	0.41808	0.0382	0.41808	0.08533
0.41044	0.01649	0.41044	0.03446	0.41044	0.03745	0.41044	0.0848
0.40294	0.01531	0.40294	0.03338	0.40294	0.03673	0.40294	0.0842
0.39558	0.01417	0.39558	0.03241	0.39558	0.03605	0.39558	0.08356
0.38835	0.01307	0.38835	0.03155	0.38835	0.03542	0.38835	0.08289
0.38126	0.01203	0.38126	0.03082	0.38126	0.03484	0.38126	0.0822
0.3743	0.01103	0.3743	0.03022	0.3743	0.03433	0.3743	0.08151
0.36746	0.01009	0.36746	0.02975	0.36746	0.03388	0.36746	0.08085
0.36074	0.0092	0.36074	0.02942	0.36074	0.03351	0.36074	0.08022
0.35415	0.00837	0.35415	0.02923	0.35415	0.03322	0.35415	0.07966
0.34769	0.00759	0.34769	0.0292	0.34769	0.03301	0.34769	0.07917
0.34133	0.00686	0.34133	0.02931	0.34133	0.0329	0.34133	0.07878
0.3351	0.00619	0.3351	0.02958	0.3351	0.03287	0.3351	0.0785
0.32898	0.00557	0.32898	0.03	0.32898	0.03295	0.32898	0.07835
0.32297	0.005	0.32297	0.03058	0.32297	0.03313	0.32297	0.07834
0.31707	0.00448	0.31707	0.03132	0.31707	0.03341	0.31707	0.07849
0.31127	0.00401	0.31127	0.03221	0.31127	0.03381	0.31127	0.07881
0.30559	0.00358	0.30559	0.03325	0.30559	0.03432	0.30559	0.07931
0.30001	0.0032	0.30001	0.03445	0.30001	0.03494	0.30001	0.08
0.29453	0.00287	0.29453	0.03579	0.29453	0.03569	0.29453	0.08089
0.28915	0.00258	0.28915	0.03729	0.28915	0.03656	0.28915	0.08198
0.28386	0.00232	0.28386	0.03893	0.28386	0.03755	0.28386	0.08327
0.27868	0.00211	0.27868	0.04072	0.27868	0.03867	0.27868	0.08476
0.27359	0.00193	0.27359	0.04264	0.27359	0.03992	0.27359	0.08645
0.26859	0.00179	0.26859	0.0447	0.26859	0.04131	0.26859	0.08834
0.26368	0.00169	0.26368	0.0469	0.26368	0.04282	0.26368	0.09042
0.25887	0.00162	0.25887	0.04922	0.25887	0.04447	0.25887	0.09269
0.25414	0.00159	0.25414	0.05166	0.25414	0.04625	0.25414	0.09513
0.24949	0.0016	0.24949	0.05422	0.24949	0.04816	0.24949	0.09773
0.24494	0.00164	0.24494	0.05689	0.24494	0.0502	0.24494	0.10048
0.24046	0.00173	0.24046	0.05967	0.24046	0.05238	0.24046	0.10337
0.23607	0.00185	0.23607	0.06255	0.23607	0.05468	0.23607	0.10638
0.23176	0.00202	0.23176	0.06552	0.23176	0.05712	0.23176	0.10949
0.22752	0.00223	0.22752	0.06858	0.22752	0.05967	0.22752	0.11269
0.22337	0.0025	0.22337	0.07173	0.22337	0.06235	0.22337	0.11597
0.21929	0.00281	0.21929	0.07494	0.21929	0.06514	0.21929	0.1193
0.21528	0.00319	0.21528	0.07822	0.21528	0.06805	0.21528	0.12267
0.21135	0.00362	0.21135	0.08156	0.21135	0.07105	0.21135	0.12607
0.20749	0.00412	0.20749	0.08494	0.20749	0.07416	0.20749	0.12946
0.2037	0.00469	0.2037	0.08837	0.2037	0.07736	0.2037	0.13285
0.19998	0.00533	0.19998	0.09183	0.19998	0.08063	0.19998	0.13621
0.19632	0.00606	0.19632	0.09531	0.19632	0.08398	0.19632	0.13953
0.19274	0.00688	0.19274	0.0988	0.19274	0.08739	0.19274	0.1428
0.18921	0.0078	0.18921	0.1023	0.18921	0.09086	0.18921	0.146
0.18576	0.00881	0.18576	0.10578	0.18576	0.09436	0.18576	0.14913
0.18236	0.00993	0.18236	0.10925	0.18236	0.0979	0.18236	0.15217
0.17903	0.01117	0.17903	0.1127	0.17903	0.10145	0.17903	0.15511
0.17576	0.01253	0.17576	0.1161	0.17576	0.105	0.17576	0.15795
0.17255	0.01402	0.17255	0.11946	0.17255	0.10855	0.17255	0.16067
0.1694	0.01563	0.1694	0.12275	0.1694	0.11207	0.1694	0.16328
0.16631	0.01739	0.16631	0.12598	0.16631	0.11557	0.16631	0.16577
0.16327	0.01929	0.16327	0.12913	0.16327	0.11901	0.16327	0.16813
0.16028	0.02134	0.16028	0.13218	0.16028	0.12239	0.16028	0.17036
0.15736	0.02354	0.15736	0.13514	0.15736	0.1257	0.15736	0.17246
0.15448	0.02589	0.15448	0.13799	0.15448	0.12893	0.15448	0.17442
0.15166	0.02839	0.15166	0.14071	0.15166	0.13206	0.15166	0.17625
0.14889	0.03105	0.14889	0.14331	0.14889	0.13509	0.14889	0.17794
0.14617	0.03387	0.14617	0.14578	0.14617	0.138	0.14617	0.1795
0.1435	0.03684	0.1435	0.1481	0.1435	0.14079	0.1435	0.18093
0.14088	0.03995	0.14088	0.15027	0.14088	0.14345	0.14088	0.18222
0.1383	0.04321	0.1383	0.15228	0.1383	0.14597	0.1383	0.18337
0.13578	0.04661	0.13578	0.15413	0.13578	0.14835	0.13578	0.18439
0.1333	0.05014	0.1333	0.15582	0.1333	0.15059	0.1333	0.18529
0.13086	0.05379	0.13086	0.15734	0.13086	0.15268	0.13086	0.18604
0.12847	0.05755	0.12847	0.15868	0.12847	0.15462	0.12847	0.18667
0.12613	0.06141	0.12613	0.15985	0.12613	0.15641	0.12613	0.18717
0.12382	0.06536	0.12382	0.16084	0.12382	0.15806	0.12382	0.18754
0.12156	0.06937	0.12156	0.16166	0.12156	0.15957	0.12156	0.18779
0.11934	0.07345	0.11934	0.1623	0.11934	0.16093	0.11934	0.1879
0.11716	0.07756	0.11716	0.16276	0.11716	0.16216	0.11716	0.18789
0.11502	0.0817	0.11502	0.16305	0.11502	0.16326	0.11502	0.18775
0.11292	0.08584	0.11292	0.16317	0.11292	0.16423	0.11292	0.18749
0.11085	0.08996	0.11085	0.16312	0.11085	0.16509	0.11085	0.1871
0.10883	0.09406	0.10883	0.16291	0.10883	0.16583	0.10883	0.18658
0.10684	0.0981	0.10684	0.16254	0.10684	0.16647	0.10684	0.18594
0.10489	0.10208	0.10489	0.16201	0.10489	0.16701	0.10489	0.18518
0.10297	0.10596	0.10297	0.16134	0.10297	0.16746	0.10297	0.18429
0.10109	0.10975	0.10109	0.16052	0.10109	0.16782	0.10109	0.18327
0.09925	0.11341	0.09925	0.15957	0.09925	0.1681	0.09925	0.18214
0.09743	0.11693	0.09743	0.15848	0.09743	0.1683	0.09743	0.18088
0.09565	0.12029	0.09565	0.15727	0.09565	0.16843	0.09565	0.17951
0.09391	0.12349	0.09391	0.15594	0.09391	0.16849	0.09391	0.17801
0.09219	0.12651	0.09219	0.15451	0.09219	0.16848	0.09219	0.1764
0.09051	0.12934	0.09051	0.15297	0.09051	0.16841	0.09051	0.17468
0.08885	0.13197	0.08885	0.15133	0.08885	0.16826	0.08885	0.17284
0.08723	0.13439	0.08723	0.14961	0.08723	0.16805	0.08723	0.1709
0.08564	0.13659	0.08564	0.14781	0.08564	0.16776	0.08564	0.16885
0.08407	0.13857	0.08407	0.14593	0.08407	0.1674	0.08407	0.1667
0.08254	0.14033	0.08254	0.14398	0.08254	0.16696	0.08254	0.16446
0.08103	0.14186	0.08103	0.14198	0.08103	0.16643	0.08103	0.16212
0.07955	0.14316	0.07955	0.13992	0.07955	0.1658	0.07955	0.1597
0.07809	0.14424	0.07809	0.13782	0.07809	0.16508	0.07809	0.1572
0.07667	0.14509	0.07667	0.13568	0.07667	0.16425	0.07667	0.15463
0.07527	0.14573	0.07527	0.13351	0.07527	0.1633	0.07527	0.15198
0.07389	0.14615	0.07389	0.1313	0.07389	0.16223	0.07389	0.14927
0.07254	0.14636	0.07254	0.12908	0.07254	0.16103	0.07254	0.1465
0.07122	0.14637	0.07122	0.12684	0.07122	0.15968	0.07122	0.14369
0.06992	0.14619	0.06992	0.12459	0.06992	0.15819	0.06992	0.14083
0.06864	0.14581	0.06864	0.12233	0.06864	0.15654	0.06864	0.13793
0.06739	0.14526	0.06739	0.12006	0.06739	0.15473	0.06739	0.13499
0.06615	0.14454	0.06615	0.1178	0.06615	0.15275	0.06615	0.13203
0.06495	0.14366	0.06495	0.11554	0.06495	0.1506	0.06495	0.12905
0.06376	0.14263	0.06376	0.11329	0.06376	0.14828	0.06376	0.12606
0.06259	0.14145	0.06259	0.11104	0.06259	0.14578	0.06259	0.12305
0.06145	0.14014	0.06145	0.10881	0.06145	0.1431	0.06145	0.12004
0.06033	0.1387	0.06033	0.10658	0.06033	0.14026	0.06033	0.11703
0.05923	0.13714	0.05923	0.10437	0.05923	0.13724	0.05923	0.11403
0.05814	0.13548	0.05814	0.10218	0.05814	0.13405	0.05814	0.11103
0.05708	0.13371	0.05708	0.09999	0.05708	0.13071	0.05708	0.10804
0.05604	0.13185	0.05604	0.09782	0.05604	0.12721	0.05604	0.10507
0.05502	0.1299	0.05502	0.09566	0.05502	0.12357	0.05502	0.10211
0.05401	0.12786	0.05401	0.09351	0.05401	0.11981	0.05401	0.09918
0.05302	0.12576	0.05302	0.09138	0.05302	0.11592	0.05302	0.09626
0.05206	0.12358	0.05206	0.08925	0.05206	0.11194	0.05206	0.09337
0.0511	0.12134	0.0511	0.08713	0.0511	0.10786	0.0511	0.09051
0.05017	0.11904	0.05017	0.08502	0.05017	0.10371	0.05017	0.08768
0.04925	0.11668	0.04925	0.08291	0.04925	0.0995	0.04925	0.08487
0.04835	0.11427	0.04835	0.0808	0.04835	0.09526	0.04835	0.0821
0.04747	0.11182	0.04747	0.0787	0.04747	0.09099	0.04747	0.07935
0.0466	0.10932	0.0466	0.07659	0.0466	0.08671	0.0466	0.07664
0.04575	0.10678	0.04575	0.07449	0.04575	0.08245	0.04575	0.07396
0.04492	0.10421	0.04492	0.07238	0.04492	0.07821	0.04492	0.07131
0.0441	0.1016	0.0441	0.07027	0.0441	0.07402	0.0441	0.06869
0.04329	0.09896	0.04329	0.06815	0.04329	0.06988	0.04329	0.06611
0.0425	0.09629	0.0425	0.06603	0.0425	0.06582	0.0425	0.06357
0.04172	0.0936	0.04172	0.06391	0.04172	0.06185	0.04172	0.06106
0.04096	0.09089	0.04096	0.06178	0.04096	0.05797	0.04096	0.05859
0.04021	0.08817	0.04021	0.05966	0.04021	0.05421	0.04021	0.05616
0.03948	0.08543	0.03948	0.05753	0.03948	0.05056	0.03948	0.05376
0.03876	0.08268	0.03876	0.0554	0.03876	0.04705	0.03876	0.05141
0.03805	0.07993	0.03805	0.05327	0.03805	0.04368	0.03805	0.0491
0.03735	0.07718	0.03735	0.05115	0.03735	0.04044	0.03735	0.04683
0.03667	0.07443	0.03667	0.04904	0.03667	0.03736	0.03667	0.04461
0.036	0.07169	0.036	0.04694	0.036	0.03442	0.036	0.04243
0.03534	0.06896	0.03534	0.04485	0.03534	0.03164	0.03534	0.04031
0.0347	0.06625	0.0347	0.04278	0.0347	0.02902	0.0347	0.03823
0.03406	0.06356	0.03406	0.04074	0.03406	0.02654	0.03406	0.03621
0.03344	0.0609	0.03344	0.03872	0.03344	0.02422	0.03344	0.03425
0.03283	0.05827	0.03283	0.03673	0.03283	0.02206	0.03283	0.03234
0.03223	0.05567	0.03223	0.03477	0.03223	0.02003	0.03223	0.0305
0.03164	0.05311	0.03164	0.03285	0.03164	0.01815	0.03164	0.02872
0.03106	0.0506	0.03106	0.03098	0.03106	0.01642	0.03106	0.027
0.0305	0.04813	0.0305	0.02915	0.0305	0.01481	0.0305	0.02535
0.02994	0.04572	0.02994	0.02737	0.02994	0.01334	0.02994	0.02377
0.02939	0.04336	0.02939	0.02564	0.02939	0.01198	0.02939	0.02226
0.02886	0.04106	0.02886	0.02397	0.02886	0.01075	0.02886	0.02083
0.02833	0.03883	0.02833	0.02236	0.02833	0.00963	0.02833	0.01947
0.02781	0.03666	0.02781	0.02081	0.02781	0.00861	0.02781	0.01819
0.0273	0.03456	0.0273	0.01933	0.0273	0.00769	0.0273	0.01699
0.0268	0.03254	0.0268	0.01792	0.0268	0.00687	0.0268	0.01587
0.02632	0.03058	0.02632	0.01657	0.02632	0.00614	0.02632	0.01483
0.02583	0.0287	0.02583	0.0153	0.02583	0.00549	0.02583	0.01387
0.02536	0.0269	0.02536	0.0141	0.02536	0.00491	0.02536	0.013
0.0249	0.02517	0.0249	0.01297	0.0249	0.00442	0.0249	0.01222
0.02444	0.02352	0.02444	0.01191	0.02444	0.00399	0.02444	0.01152
0.024	0.02195	0.024	0.01093	0.024	0.00362	0.024	0.01091
0.02356	0.02046	0.02356	0.01002	0.02356	0.00333	0.02356	0.01038
0.02313	0.01905	0.02313	0.00919	0.02313	0.00309	0.02313	0.00995
0.02271	0.01771	0.02271	0.00843	0.02271	0.0029	0.02271	0.0096
0.02229	0.01646	0.02229	0.00774	0.02229	0.00278	0.02229	0.00934
0.02188	0.01528	0.02188	0.00712	0.02188	0.00271	0.02188	0.00917
0.02148	0.01417	0.02148	0.00658	0.02148	0.00269	0.02148	0.00909
0.02109	0.01315	0.02109	0.0061	0.02109	0.00273	0.02109	0.00911
0.02071	0.0122	0.02071	0.0057	0.02071	0.00283	0.02071	0.00921
0.02033	0.01132	0.02033	0.00537	0.02033	0.00298	0.02033	0.0094
0.01996	0.01051	0.01996	0.00511	0.01996	0.00318	0.01996	0.00969
0.01959	0.00978	0.01959	0.00492	0.01959	0.00344	0.01959	0.01007
0.01923	0.00912	0.01923	0.00479	0.01923	0.00377	0.01923	0.01055
0.01888	0.00852	0.01888	0.00474	0.01888	0.00415	0.01888	0.01112
0.01854	0.008	0.01854	0.00475	0.01854	0.00461	0.01854	0.01178
0.0182	0.00755	0.0182	0.00484	0.0182	0.00513	0.0182	0.01254
0.01787	0.00716	0.01787	0.00499	0.01787	0.00572	0.01787	0.0134
0.01754	0.00685	0.01754	0.00522	0.01754	0.00638	0.01754	0.01435
0.01722	0.0066	0.01722	0.00552	0.01722	0.00713	0.01722	0.0154
0.01691	0.00641	0.01691	0.00589	0.01691	0.00795	0.01691	0.01655
0.0166	0.0063	0.0166	0.00633	0.0166	0.00886	0.0166	0.01779
0.01629	0.00625	0.01629	0.00685	0.01629	0.00986	0.01629	0.01913
0.016	0.00628	0.016	0.00744	0.016	0.01095	0.016	0.02057
0.0157	0.00637	0.0157	0.00811	0.0157	0.01213	0.0157	0.0221
0.01542	0.00653	0.01542	0.00885	0.01542	0.0134	0.01542	0.02372
0.01514	0.00676	0.01514	0.00968	0.01514	0.01477	0.01514	0.02543
0.01486	0.00706	0.01486	0.01058	0.01486	0.01624	0.01486	0.02723
0.01459	0.00744	0.01459	0.01157	0.01459	0.0178	0.01459	0.02911
0.01432	0.00789	0.01432	0.01263	0.01432	0.01946	0.01432	0.03107
0.01406	0.00842	0.01406	0.01377	0.01406	0.02121	0.01406	0.03311
0.0138	0.00902	0.0138	0.01499	0.0138	0.02306	0.0138	0.03522
0.01355	0.00971	0.01355	0.01629	0.01355	0.02499	0.01355	0.03738
0.0133	0.01047	0.0133	0.01766	0.0133	0.027	0.0133	0.0396
0.01306	0.01132	0.01306	0.01911	0.01306	0.02909	0.01306	0.04187
0.01282	0.01225	0.01282	0.02064	0.01282	0.03125	0.01282	0.04417
0.01259	0.01327	0.01259	0.02223	0.01259	0.03347	0.01259	0.0465
0.01236	0.01437	0.01236	0.02389	0.01236	0.03574	0.01236	0.04885
0.01213	0.01556	0.01213	0.02561	0.01213	0.03806	0.01213	0.05119
0.01191	0.01684	0.01191	0.02739	0.01191	0.0404	0.01191	0.05353
0.01169	0.01821	0.01169	0.02923	0.01169	0.04277	0.01169	0.05584
0.01148	0.01968	0.01148	0.03111	0.01148	0.04514	0.01148	0.05811
0.01127	0.02123	0.01127	0.03303	0.01127	0.0475	0.01127	0.06034
0.01106	0.02287	0.01106	0.03499	0.01106	0.04984	0.01106	0.06249
0.01086	0.02461	0.01086	0.03698	0.01086	0.05214	0.01086	0.06456
0.01066	0.02643	0.01066	0.03898	0.01066	0.05439	0.01066	0.06654
0.01047	0.02835	0.01047	0.041	0.01047	0.05657	0.01047	0.06841
0.01028	0.03034	0.01028	0.04303	0.01028	0.05867	0.01028	0.07015
0.01009	0.03242	0.01009	0.04505	0.01009	0.06067	0.01009	0.07175
0.0099	0.03458	0.0099	0.04705	0.0099	0.06256	0.0099	0.07319
0.00972	0.03681	0.00972	0.04904	0.00972	0.06433	0.00972	0.07447
0.00955	0.03911	0.00955	0.051	0.00955	0.06596	0.00955	0.07558
0.00937	0.04147	0.00937	0.05291	0.00937	0.06743	0.00937	0.0765
0.0092	0.04389	0.0092	0.05478	0.0092	0.06874	0.0092	0.07722
0.00903	0.04635	0.00903	0.0566	0.00903	0.06989	0.00903	0.07774
0.00887	0.04885	0.00887	0.05835	0.00887	0.07085	0.00887	0.07805
0.00871	0.05138	0.00871	0.06003	0.00871	0.07162	0.00871	0.07815
0.00855	0.05392	0.00855	0.06162	0.00855	0.07221	0.00855	0.07804
0.00839	0.05647	0.00839	0.06313	0.00839	0.07259	0.00839	0.07771
0.00824	0.05902	0.00824	0.06454	0.00824	0.07278	0.00824	0.07717
0.00809	0.06154	0.00809	0.06585	0.00809	0.07278	0.00809	0.07641
0.00794	0.06403	0.00794	0.06704	0.00794	0.07257	0.00794	0.07546
0.00779	0.06647	0.00779	0.06813	0.00779	0.07217	0.00779	0.0743
0.00765	0.06884	0.00765	0.06909	0.00765	0.07158	0.00765	0.07296
0.00751	0.07113	0.00751	0.06992	0.00751	0.07081	0.00751	0.07143
0.00737	0.07333	0.00737	0.07062	0.00737	0.06986	0.00737	0.06974
0.00724	0.07542	0.00724	0.07119	0.00724	0.06875	0.00724	0.0679
0.00711	0.07739	0.00711	0.07162	0.00711	0.06748	0.00711	0.06591
0.00698	0.07921	0.00698	0.07191	0.00698	0.06606	0.00698	0.0638
0.00685	0.08088	0.00685	0.07205	0.00685	0.06451	0.00685	0.06157
0.00672	0.08238	0.00672	0.07206	0.00672	0.06284	0.00672	0.05925
0.0066	0.0837	0.0066	0.07191	0.0066	0.06106	0.0066	0.05685
0.00648	0.08483	0.00648	0.07163	0.00648	0.05918	0.00648	0.05439
0.00636	0.08576	0.00636	0.07119	0.00636	0.05722	0.00636	0.05189
0.00625	0.08647	0.00625	0.07062	0.00625	0.05519	0.00625	0.04935
0.00613	0.08696	0.00613	0.06991	0.00613	0.05311	0.00613	0.0468
0.00602	0.08723	0.00602	0.06906	0.00602	0.05099	0.00602	0.04425
0.00591	0.08727	0.00591	0.06808	0.00591	0.04883	0.00591	0.04172
0.0058	0.08708	0.0058	0.06697	0.0058	0.04666	0.0058	0.03922
0.0057	0.08666	0.0057	0.06574	0.0057	0.04449	0.0057	0.03675
0.00559	0.08601	0.00559	0.06439	0.00559	0.04232	0.00559	0.03434
0.00549	0.08513	0.00549	0.06293	0.00549	0.04017	0.00549	0.03199
0.00539	0.08403	0.00539	0.06137	0.00539	0.03804	0.00539	0.02972
0.00529	0.08272	0.00529	0.05971	0.00529	0.03594	0.00529	0.02752
0.0052	0.0812	0.0052	0.05797	0.0052	0.03389	0.0052	0.02541
0.0051	0.07949	0.0051	0.05615	0.0051	0.03189	0.0051	0.02339
0.00501	0.0776	0.00501	0.05426	0.00501	0.02995	0.00501	0.02147
0.00492	0.07555	0.00492	0.05232	0.00492	0.02806	0.00492	0.01965
0.00483	0.07334	0.00483	0.05032	0.00483	0.02624	0.00483	0.01793
0.00474	0.07099	0.00474	0.04829	0.00474	0.02449	0.00474	0.01631
0.00465	0.06853	0.00465	0.04622	0.00465	0.0228	0.00465	0.0148
0.00457	0.06596	0.00457	0.04414	0.00457	0.0212	0.00457	0.01338
0.00448	0.06331	0.00448	0.04205	0.00448	0.01966	0.00448	0.01207
0.0044	0.06059	0.0044	0.03996	0.0044	0.01821	0.0044	0.01086
0.00432	0.05782	0.00432	0.03788	0.00432	0.01682	0.00432	0.00974
0.00424	0.05502	0.00424	0.03581	0.00424	0.01552	0.00424	0.00871
0.00416	0.05221	0.00416	0.03378	0.00416	0.01429	0.00416	0.00777
0.00409	0.04939	0.00409	0.03178	0.00409	0.01314	0.00409	0.00692
0.00401	0.0466	0.00401	0.02983	0.00401	0.01205	0.00401	0.00615
0.00394	0.04384	0.00394	0.02792	0.00394	0.01105	0.00394	0.00545
0.00387	0.04112	0.00387	0.02608	0.00387	0.01011	0.00387	0.00483
0.0038	0.03847	0.0038	0.02429	0.0038	0.00924	0.0038	0.00428
0.00373	0.03588	0.00373	0.02258	0.00373	0.00844	0.00373	0.0038
0.00366	0.03338	0.00366	0.02094	0.00366	0.0077	0.00366	0.00337
0.00359	0.03097	0.00359	0.01937	0.00359	0.00702	0.00359	0.003
0.00353	0.02866	0.00353	0.01789	0.00353	0.00641	0.00353	0.00269
0.00346	0.02645	0.00346	0.01648	0.00346	0.00586	0.00346	0.00243
0.0034	0.02436	0.0034	0.01517	0.0034	0.00536	0.0034	0.00222
0.00334	0.02238	0.00334	0.01394	0.00334	0.00492	0.00334	0.00205
0.00328	0.02053	0.00328	0.0128	0.00328	0.00454	0.00328	0.00194
0.00322	0.01879	0.00322	0.01175	0.00322	0.00421	0.00322	0.00186
0.00316	0.01718	0.00316	0.01079	0.00316	0.00393	0.00316	0.00183
0.0031	0.01569	0.0031	0.00992	0.0031	0.00371	0.0031	0.00184
0.00304	0.01433	0.00304	0.00913	0.00304	0.00354	0.00304	0.0019
0.00299	0.01309	0.00299	0.00844	0.00299	0.00342	0.00299	0.00199
0.00293	0.01197	0.00293	0.00784	0.00293	0.00335	0.00293	0.00214
0.00288	0.01097	0.00288	0.00732	0.00288	0.00334	0.00288	0.00232
0.00283	0.0101	0.00283	0.00689	0.00283	0.00338	0.00283	0.00256
0.00278	0.00933	0.00278	0.00655	0.00278	0.00347	0.00278	0.00284
0.00272	0.00869	0.00272	0.0063	0.00272	0.00363	0.00272	0.00318
0.00268	0.00815	0.00268	0.00613	0.00268	0.00383	0.00268	0.00357
0.00263	0.00772	0.00263	0.00605	0.00263	0.0041	0.00263	0.00402
0.00258	0.0074	0.00258	0.00606	0.00258	0.00443	0.00258	0.00453
0.00253	0.00719	0.00253	0.00615	0.00253	0.00482	0.00253	0.0051
0.00248	0.00707	0.00248	0.00632	0.00248	0.00527	0.00248	0.00574
0.00244	0.00705	0.00244	0.00658	0.00244	0.0058	0.00244	0.00645
0.00239	0.00713	0.00239	0.00692	0.00239	0.00639	0.00239	0.00724
0.00235	0.00731	0.00235	0.00735	0.00235	0.00705	0.00235	0.0081
0.00231	0.00757	0.00231	0.00787	0.00231	0.00779	0.00231	0.00905
0.00227	0.00793	0.00227	0.00847	0.00227	0.0086	0.00227	0.01008
0.00222	0.00837	0.00222	0.00915	0.00222	0.00949	0.00222	0.01119
0.00218	0.0089	0.00218	0.00992	0.00218	0.01046	0.00218	0.0124
0.00214	0.00952	0.00214	0.01077	0.00214	0.01151	0.00214	0.01369
0.0021	0.01021	0.0021	0.0117	0.0021	0.01263	0.0021	0.01507
0.00207	0.01098	0.00207	0.01271	0.00207	0.01384	0.00207	0.01655
0.00203	0.01183	0.00203	0.0138	0.00203	0.01512	0.00203	0.01812
0.00199	0.01275	0.00199	0.01496	0.00199	0.01648	0.00199	0.01977
0.00196	0.01373	0.00196	0.0162	0.00196	0.01791	0.00196	0.02152
0.00192	0.01478	0.00192	0.01751	0.00192	0.01941	0.00192	0.02334
0.00188	0.01589	0.00188	0.01888	0.00188	0.02098	0.00188	0.02524
0.00185	0.01706	0.00185	0.02031	0.00185	0.02261	0.00185	0.02722
0.00182	0.01827	0.00182	0.0218	0.00182	0.02429	0.00182	0.02926
0.00178	0.01953	0.00178	0.02333	0.00178	0.02603	0.00178	0.03136
0.00175	0.02082	0.00175	0.0249	0.00175	0.0278	0.00175	0.0335
0.00172	0.02214	0.00172	0.0265	0.00172	0.02961	0.00172	0.03569
0.00169	0.02348	0.00169	0.02812	0.00169	0.03144	0.00169	0.0379
0.00166	0.02483	0.00166	0.02976	0.00166	0.03328	0.00166	0.04012
0.00163	0.02619	0.00163	0.0314	0.00163	0.03513	0.00163	0.04235
0.0016	0.02755	0.0016	0.03303	0.0016	0.03696	0.0016	0.04456
0.00157	0.02888	0.00157	0.03465	0.00157	0.03877	0.00157	0.04675
0.00154	0.0302	0.00154	0.03623	0.00154	0.04055	0.00154	0.0489
0.00151	0.03148	0.00151	0.03777	0.00151	0.04228	0.00151	0.05099
0.00148	0.03272	0.00148	0.03926	0.00148	0.04395	0.00148	0.053
0.00146	0.0339	0.00146	0.04069	0.00146	0.04555	0.00146	0.05493
0.00143	0.03503	0.00143	0.04204	0.00143	0.04707	0.00143	0.05675
0.0014	0.03608	0.0014	0.0433	0.0014	0.04848	0.0014	0.05846
0.00138	0.03704	0.00138	0.04446	0.00138	0.04979	0.00138	0.06004
0.00135	0.03792	0.00135	0.04552	0.00135	0.05097	0.00135	0.06147
0.00133	0.03871	0.00133	0.04646	0.00133	0.05203	0.00133	0.06274
0.0013	0.03939	0.0013	0.04728	0.0013	0.05294	0.0013	0.06384
0.00128	0.03996	0.00128	0.04796	0.00128	0.05371	0.00128	0.06477
0.00126	0.04041	0.00126	0.04851	0.00126	0.05432	0.00126	0.06551
0.00123	0.04075	0.00123	0.04891	0.00123	0.05477	0.00123	0.06605
0.00121	0.04096	0.00121	0.04917	0.00121	0.05506	0.00121	0.0664
0.00119	0.04105	0.00119	0.04928	0.00119	0.05518	0.00119	0.06654
0.00117	0.04102	0.00117	0.04923	0.00117	0.05513	0.00117	0.06649
0.00115	0.04085	0.00115	0.04904	0.00115	0.05492	0.00115	0.06623
0.00112	0.04057	0.00112	0.0487	0.00112	0.05454	0.00112	0.06577
0.0011	0.04017	0.0011	0.04822	0.0011	0.05399	0.0011	0.06511
0.00108	0.03965	0.00108	0.04759	0.00108	0.05329	0.00108	0.06427
0.00106	0.03901	0.00106	0.04683	0.00106	0.05244	0.00106	0.06324
0.00104	0.03827	0.00104	0.04594	0.00104	0.05145	0.00104	0.06204
0.00103	0.03743	0.00103	0.04493	0.00103	0.05032	0.00103	0.06068
0.00101	0.0365	0.00101	0.04381	0.00101	0.04906	0.00101	0.05917
0.000988464	0.03548	0.000988464	0.04259	0.000988464	0.04769	0.000988464	0.05752
0.000970407	0.03439	0.000970407	0.04128	0.000970407	0.04622	0.000970407	0.05574
0.000952679	0.03322	0.000952679	0.03988	0.000952679	0.04466	0.000952679	0.05386
0.000935276	0.032	0.000935276	0.03842	0.000935276	0.04302	0.000935276	0.05188
0.00091819	0.03073	0.00091819	0.03689	0.00091819	0.04131	0.00091819	0.04982
0.000901417	0.02942	0.000901417	0.03532	0.000901417	0.03955	0.000901417	0.0477
0.00088495	0.02808	0.00088495	0.03371	0.00088495	0.03775	0.00088495	0.04552
0.000868784	0.02672	0.000868784	0.03208	0.000868784	0.03592	0.000868784	0.04332
0.000852913	0.02535	0.000852913	0.03043	0.000852913	0.03408	0.000852913	0.0411
0.000837332	0.02398	0.000837332	0.02878	0.000837332	0.03223	0.000837332	0.03887
0.000822036	0.02261	0.000822036	0.02714	0.000822036	0.03039	0.000822036	0.03665
0.000807019	0.02125	0.000807019	0.02551	0.000807019	0.02857	0.000807019	0.03445
0.000792276	0.01992	0.000792276	0.02391	0.000792276	0.02677	0.000792276	0.03229
0.000777803	0.01861	0.000777803	0.02234	0.000777803	0.02502	0.000777803	0.03017
0.000763594	0.01733	0.000763594	0.02081	0.000763594	0.0233	0.000763594	0.0281
0.000749645	0.0161	0.000749645	0.01932	0.000749645	0.02164	0.000749645	0.02609
0.000735951	0.0149	0.000735951	0.01789	0.000735951	0.02003	0.000735951	0.02416
0.000722506	0.01376	0.000722506	0.01651	0.000722506	0.01849	0.000722506	0.0223
0.000709308	0.01266	0.000709308	0.01519	0.000709308	0.01701	0.000709308	0.02052
0.00069635	0.01161	0.00069635	0.01394	0.00069635	0.01561	0.00069635	0.01882
0.000683629	0.01062	0.000683629	0.01275	0.000683629	0.01428	0.000683629	0.01722
0.000671141	0.00968	0.000671141	0.01162	0.000671141	0.01302	0.000671141	0.0157
0.000658881	0.0088	0.000658881	0.01057	0.000658881	0.01183	0.000658881	0.01427
0.000646844	0.00798	0.000646844	0.00958	0.000646844	0.01072	0.000646844	0.01293
0.000635028	0.00721	0.000635028	0.00865	0.000635028	0.00969	0.000635028	0.01168
0.000623427	0.00649	0.000623427	0.00779	0.000623427	0.00873	0.000623427	0.01052
0.000612039	0.00583	0.000612039	0.007	0.000612039	0.00784	0.000612039	0.00945
0.000600858	0.00522	0.000600858	0.00627	0.000600858	0.00702	0.000600858	0.00846
0.000589881	0.00466	0.000589881	0.00559	0.000589881	0.00626	0.000589881	0.00755
0.000579106	0.00415	0.000579106	0.00498	0.000579106	0.00557	0.000579106	0.00672
0.000568527	0.00368	0.000568527	0.00441	0.000568527	0.00494	0.000568527	0.00596
0.000558141	0.00325	0.000558141	0.0039	0.000558141	0.00437	0.000558141	0.00527
0.000547945	0.00287	0.000547945	0.00344	0.000547945	0.00386	0.000547945	0.00465
0.000537935	0.00252	0.000537935	0.00303	0.000537935	0.00339	0.000537935	0.00409
0.000528108	0.00221	0.000528108	0.00265	0.000528108	0.00297	0.000528108	0.00358
0.000518461	0.00193	0.000518461	0.00232	0.000518461	0.00259	0.000518461	0.00313
0.000508989	0.00168	0.000508989	0.00202	0.000508989	0.00226	0.000508989	0.00273
0.000499691	0.00146	0.000499691	0.00175	0.000499691	0.00196	0.000499691	0.00237
0.000490563	0.00126	0.000490563	0.00152	0.000490563	0.0017	0.000490563	0.00205
0.000481601	0.00109	0.000481601	0.00131	0.000481601	0.00147	0.000481601	0.00177
0.000472804	0.000938893	0.000472804	0.00113	0.000472804	0.00126	0.000472804	0.00152
0.000464166	0.000805447	0.000464166	0.000966861	0.000464166	0.00108	0.000464166	0.00131
0.000455687	0.000688865	0.000455687	0.000826915	0.000455687	0.000926	0.000455687	0.00112
0.000447363	0.000587363	0.000447363	0.000705073	0.000447363	0.000789558	0.000447363	0.000952147
0.00043919	0.000499293	0.00043919	0.000599353	0.00043919	0.00067117	0.00043919	0.00080938
0.000431167	0.000423136	0.000431167	0.000507934	0.000431167	0.000568797	0.000431167	0.000685926
0.000423291	0.000357504	0.000423291	0.000429148	0.000423291	0.000480571	0.000423291	0.000579532
0.000415558	0.000301132	0.000415558	0.00036148	0.000415558	0.000404794	0.000415558	0.000488151
0.000407967	0.000252877	0.000407967	0.000303554	0.000407967	0.000339927	0.000407967	0.000409926
0.000400514	0.000211708	0.000400514	0.000254135	0.000400514	0.000284586	0.000400514	0.000343189
0.000393198	0.000176702	0.000393198	0.000212113	0.000393198	0.00023753	0.000393198	0.000286443
0.000386015	0.000147035	0.000386015	0.000176501	0.000386015	0.00019765	0.000386015	0.000238351
0.000378963	0.000121976	0.000378963	0.000146421	0.000378963	0.000163966	0.000378963	0.00019773
0.00037204	0.000100881	0.00037204	0.000121097	0.00037204	0.000135608	0.00037204	0.000163533
0.000365244	8.31793e-05	0.000365244	9.98486e-05	0.000365244	0.000111813	0.000365244	0.000134838
0.000358572	6.83752e-05	0.000358572	8.20777e-05	0.000358572	9.19127e-05	0.000358572	0.00011084
0.000352021	5.60348e-05	0.000352021	6.72643e-05	0.000352021	7.53242e-05	0.000352021	9.08353e-05
0.00034559	4.57818e-05	0.00034559	5.49566e-05	0.00034559	6.15417e-05	0.00034559	7.42147e-05
0.000339277	3.72909e-05	0.000339277	4.47642e-05	0.000339277	5.0128e-05	0.000339277	6.04506e-05
0.000333079	3.02824e-05	0.000333079	3.63511e-05	0.000333079	4.07068e-05	0.000333079	4.90894e-05
0.000326995	2.45162e-05	0.000326995	2.94293e-05	0.000326995	3.29557e-05	0.000326995	3.9742e-05
0.000321021	1.97875e-05	0.000321021	2.3753e-05	0.000321021	2.65992e-05	0.000321021	3.20766e-05
0.000315157	1.59223e-05	0.000315157	1.91132e-05	0.000315157	2.14034e-05	0.000315157	2.58109e-05
0.0003094	1.27731e-05	0.0003094	1.53329e-05	0.0003094	1.71701e-05	0.0003094	2.07059e-05
0.000303748	1.02156e-05	0.000303748	1.22628e-05	0.000303748	1.37322e-05	0.000303748	1.656e-05
0.000298199	8.14525e-06	0.000298199	9.77758e-06	0.000298199	1.09492e-05	0.000298199	1.32039e-05
0.000292751	6.47474e-06	0.000292751	7.77229e-06	0.000292751	8.70361e-06	0.000292751	1.04959e-05
0.000287403	5.13116e-06	0.000287403	6.15947e-06	0.000287403	6.89752e-06	0.000287403	8.31789e-06
0.000282153	4.05402e-06	0.000282153	4.86645e-06	0.000282153	5.44958e-06	0.000282153	6.57178e-06
0.000276999	3.19324e-06	0.000276999	3.83317e-06	0.000276999	4.29248e-06	0.000276999	5.1764e-06
0.000271939	2.50757e-06	0.000271939	3.01009e-06	0.000271939	3.37077e-06	0.000271939	4.0649e-06
0.000266971	1.96313e-06	0.000266971	2.35655e-06	0.000266971	2.63892e-06	0.000266971	3.18234e-06
0.000262094	1.53223e-06	0.000262094	1.83929e-06	0.000262094	2.05968e-06	0.000262094	2.48382e-06
0.000257306	1.19226e-06	0.000257306	1.4312e-06	0.000257306	1.60269e-06	0.000257306	1.93272e-06
0.000252606	9.24904e-07	0.000252606	1.11026e-06	0.000252606	1.24329e-06	0.000252606	1.49932e-06
0.000247991	7.15316e-07	0.000247991	8.58667e-07	0.000247991	9.61557e-07	0.000247991	1.15956e-06
0.000243461	5.51537e-07	0.000243461	6.62066e-07	0.000243461	7.41398e-07	0.000243461	8.9407e-07
0.000239013	4.23962e-07	0.000239013	5.08925e-07	0.000239013	5.69907e-07	0.000239013	6.87265e-07
0.000234647	3.24904e-07	0.000234647	3.90016e-07	0.000234647	4.36749e-07	0.000234647	5.26687e-07
0.00023036	2.48233e-07	0.00023036	2.9798e-07	0.00023036	3.33685e-07	0.00023036	4.02399e-07
0.000226152	1.89077e-07	0.000226152	2.26969e-07	0.000226152	2.54166e-07	0.000226152	3.06504e-07
0.000222021	1.43581e-07	0.000222021	1.72355e-07	0.000222021	1.93007e-07	0.000222021	2.32752e-07
0.000217965	1.087e-07	0.000217965	1.30483e-07	0.000217965	1.46118e-07	0.000217965	1.76208e-07
0.000213983	8.20418e-08	0.000213983	9.84833e-08	0.000213983	1.10284e-07	0.000213983	1.32994e-07
0.000210074	6.17332e-08	0.000210074	7.41048e-08	0.000210074	8.29844e-08	0.000210074	1.00073e-07
0.000206237	4.63104e-08	0.000206237	5.55911e-08	0.000206237	6.22523e-08	0.000206237	7.50716e-08
0.000202469	3.46349e-08	0.000202469	4.15758e-08	0.000202469	4.65577e-08	0.000202469	5.6145e-08
0.00019877	2.58241e-08	0.00019877	3.09993e-08	0.00019877	3.47138e-08	0.00019877	4.18622e-08
0.000195139	1.91961e-08	0.000195139	2.3043e-08	0.000195139	2.58042e-08	0.000195139	3.11178e-08
0.000191575	1.42258e-08	0.000191575	1.70766e-08	0.000191575	1.91228e-08	0.000191575	2.30607e-08
0.000188075	1.05103e-08	0.000188075	1.26166e-08	0.000188075	1.41284e-08	0.000188075	1.70377e-08
0.000184639	7.74157e-09	0.000184639	9.29301e-09	0.000184639	1.04065e-08	0.000184639	1.25495e-08
0.000181266	5.68486e-09	0.000181266	6.82412e-09	0.000181266	7.64182e-09	0.000181266	9.21546e-09
0.000177955	4.16185e-09	0.000177955	4.9959e-09	0.000177955	5.59453e-09	0.000177955	6.74658e-09
0.000174704	3.03759e-09	0.000174704	3.64633e-09	0.000174704	4.08325e-09	0.000174704	4.92409e-09
0.000171513	2.21028e-09	0.000171513	2.65322e-09	0.000171513	2.97115e-09	0.000171513	3.58298e-09
0.000168379	1.6034e-09	0.000168379	1.92472e-09	0.000168379	2.15535e-09	0.000168379	2.59919e-09
0.000165303	1.15961e-09	0.000165303	1.392e-09	0.000165303	1.55879e-09	0.000165303	1.87979e-09
0.000162284	8.36098e-10	0.000162284	1.00365e-09	0.000162284	1.12392e-09	0.000162284	1.35536e-09
0.000159319	6.01006e-10	0.000159319	7.21449e-10	0.000159319	8.07897e-10	0.000159319	9.74262e-10
0.000156409	4.30702e-10	0.000156409	5.17016e-10	0.000156409	5.78967e-10	0.000156409	6.9819e-10
0.000153551	3.07716e-10	0.000153551	3.69383e-10	0.000153551	4.13644e-10	0.000153551	4.98824e-10
0.000150746	2.19179e-10	0.000150746	2.63103e-10	0.000150746	2.9463e-10	0.000150746	3.55301e-10
0.000147993	1.55641e-10	0.000147993	1.86832e-10	0.000147993	2.09219e-10	0.000147993	2.52303e-10
0.000145289	1.10186e-10	0.000145289	1.32267e-10	0.000145289	1.48116e-10	0.000145289	1.78617e-10
0.000142635	7.77684e-11	0.000142635	9.33534e-11	0.000142635	1.04539e-10	0.000142635	1.26067e-10
0.000140029	5.47212e-11	0.000140029	6.56875e-11	0.000140029	7.35585e-11	0.000140029	8.8706e-11
0.000137471	3.8387e-11	0.000137471	4.60799e-11	0.000137471	5.16014e-11	0.000137471	6.22274e-11
0.00013496	2.68466e-11	0.00013496	3.22267e-11	0.00013496	3.60883e-11	0.00013496	4.35197e-11
0.000132495	1.87184e-11	0.000132495	2.24697e-11	0.000132495	2.51621e-11	0.000132495	3.03436e-11
0.000130074	1.30115e-11	0.000130074	1.5619e-11	0.000130074	1.74905e-11	0.000130074	2.10923e-11
0.000127698	9.01692e-12	0.000127698	1.08239e-11	0.000127698	1.21209e-11	0.000127698	1.46169e-11
0.000125365	6.22969e-12	0.000125365	7.47814e-12	0.000125365	8.37421e-12	0.000125365	1.00987e-11
0.000123075	4.29092e-12	0.000123075	5.15084e-12	0.000123075	5.76803e-12	0.000123075	6.95581e-12
0.000120827	2.94653e-12	0.000120827	3.53702e-12	0.000120827	3.96084e-12	0.000120827	4.77648e-12
0.000118619	2.01719e-12	0.000118619	2.42144e-12	0.000118619	2.71159e-12	0.000118619	3.26997e-12
0.000116453	1.37676e-12	0.000116453	1.65267e-12	0.000116453	1.8507e-12	0.000116453	2.2318e-12
0.000114325	9.36797e-13	0.000114325	1.12453e-12	0.000114325	1.25928e-12	0.000114325	1.5186e-12
0.000112237	6.3549e-13	0.000112237	7.62844e-13	0.000112237	8.54252e-13	0.000112237	1.03016e-12
0.000110186	4.29782e-13	0.000110186	5.15912e-13	0.000110186	5.77731e-13	0.000110186	6.96699e-13
0.000108174	2.89777e-13	0.000108174	3.47849e-13	0.000108174	3.8953e-13	0.000108174	4.69743e-13
0.000106197	1.94784e-13	0.000106197	2.3382e-13	0.000106197	2.61837e-13	0.000106197	3.15756e-13
0.000104257	1.30533e-13	0.000104257	1.56693e-13	0.000104257	1.75468e-13	0.000104257	2.11601e-13
0.000102353	8.72096e-14	0.000102353	1.04687e-13	0.000102353	1.17231e-13	0.000102353	1.41371e-13
0.000100483	5.80875e-14	0.000100483	6.97284e-14	0.000100483	7.80836e-14	0.000100483	9.41629e-14
9.86475e-05	3.85725e-14	9.86475e-05	4.63025e-14	9.86475e-05	5.18507e-14	9.86475e-05	6.2528e-14
9.68454e-05	2.55357e-14	9.68454e-05	3.06531e-14	9.68454e-05	3.43261e-14	9.68454e-05	4.13947e-14
9.50762e-05	1.68536e-14	9.50762e-05	2.02312e-14	9.50762e-05	2.26554e-14	9.50762e-05	2.73207e-14
9.33394e-05	1.10896e-14	9.33394e-05	1.3312e-14	9.33394e-05	1.49071e-14	9.33394e-05	1.79768e-14
9.16343e-05	7.27468e-15	9.16343e-05	8.73255e-15	9.16343e-05	9.77893e-15	9.16343e-05	1.17926e-14
8.99603e-05	4.7576e-15	8.99603e-05	5.71104e-15	8.99603e-05	6.39536e-15	8.99603e-05	7.71232e-15
8.83169e-05	3.10197e-15	8.83169e-05	3.72362e-15	8.83169e-05	4.1698e-15	8.83169e-05	5.02846e-15
8.67036e-05	2.01634e-15	8.67036e-05	2.42042e-15	8.67036e-05	2.71045e-15	8.67036e-05	3.26859e-15
8.51197e-05	1.30667e-15	8.51197e-05	1.56853e-15	8.51197e-05	1.75648e-15	8.51197e-05	2.11818e-15
8.35647e-05	8.44194e-16	8.35647e-05	1.01337e-15	8.35647e-05	1.1348e-15	8.35647e-05	1.36848e-15
8.20382e-05	5.43746e-16	8.20382e-05	6.52714e-16	8.20382e-05	7.30925e-16	8.20382e-05	8.8144e-16
8.05395e-05	3.4916e-16	8.05395e-05	4.19133e-16	8.05395e-05	4.69356e-16	8.05395e-05	5.66007e-16
7.90682e-05	2.23527e-16	7.90682e-05	2.68322e-16	7.90682e-05	3.00474e-16	7.90682e-05	3.62349e-16
7.76238e-05	1.42663e-16	7.76238e-05	1.71253e-16	7.76238e-05	1.91773e-16	7.76238e-05	2.31264e-16
7.62058e-05	9.07753e-17	7.62058e-05	1.08967e-16	7.62058e-05	1.22024e-16	7.62058e-05	1.47152e-16
7.48137e-05	5.75838e-17	7.48137e-05	6.91238e-17	7.48137e-05	7.74065e-17	7.48137e-05	9.33464e-17
7.3447e-05	3.64174e-17	7.3447e-05	4.37155e-17	7.3447e-05	4.89538e-17	7.3447e-05	5.90345e-17
7.21053e-05	2.29611e-17	7.21053e-05	2.75626e-17	7.21053e-05	3.08653e-17	7.21053e-05	3.72212e-17
7.0788e-05	1.44329e-17	7.0788e-05	1.73253e-17	7.0788e-05	1.94013e-17	7.0788e-05	2.33965e-17
6.94949e-05	9.04461e-18	6.94949e-05	1.08572e-17	6.94949e-05	1.21581e-17	6.94949e-05	1.46618e-17
6.82254e-05	5.65069e-18	6.82254e-05	6.78311e-18	6.82254e-05	7.59589e-18	6.82254e-05	9.16007e-18
6.6979e-05	3.51957e-18	6.6979e-05	4.2249e-18	6.6979e-05	4.73115e-18	6.6979e-05	5.70541e-18
6.57555e-05	2.18551e-18	6.57555e-05	2.6235e-18	6.57555e-05	2.93786e-18	6.57555e-05	3.54283e-18
6.45543e-05	1.35299e-18	6.45543e-05	1.62413e-18	6.45543e-05	1.81874e-18	6.45543e-05	2.19326e-18
6.3375e-05	8.35042e-19	6.3375e-05	1.00239e-18	6.3375e-05	1.1225e-18	6.3375e-05	1.35365e-18
6.22173e-05	5.13807e-19	6.22173e-05	6.16775e-19	6.22173e-05	6.9068e-19	6.22173e-05	8.32908e-19
6.10807e-05	3.15186e-19	6.10807e-05	3.78351e-19	6.10807e-05	4.23686e-19	6.10807e-05	5.10934e-19
5.99649e-05	1.92757e-19	5.99649e-05	2.31386e-19	5.99649e-05	2.59112e-19	5.99649e-05	3.12469e-19
5.88694e-05	1.17525e-19	5.88694e-05	1.41077e-19	5.88694e-05	1.57982e-19	5.88694e-05	1.90514e-19
5.7794e-05	7.14372e-20	5.7794e-05	8.57534e-20	5.7794e-05	9.60288e-20	5.7794e-05	1.15803e-19
5.67383e-05	4.32908e-20	5.67383e-05	5.19664e-20	5.67383e-05	5.81932e-20	5.67383e-05	7.01766e-20
5.57018e-05	2.61542e-20	5.57018e-05	3.13956e-20	5.57018e-05	3.51576e-20	5.57018e-05	4.23974e-20
5.46842e-05	1.5753e-20	5.46842e-05	1.891e-20	5.46842e-05	2.11759e-20	5.46842e-05	2.55365e-20
5.36852e-05	9.45938e-21	5.36852e-05	1.13551e-20	5.36852e-05	1.27157e-20	5.36852e-05	1.53342e-20
5.27045e-05	5.66288e-21	5.27045e-05	6.79773e-21	5.27045e-05	7.61227e-21	5.27045e-05	9.17982e-21
5.17417e-05	3.37977e-21	5.17417e-05	4.05709e-21	5.17417e-05	4.54323e-21	5.17417e-05	5.47879e-21
5.07965e-05	2.01101e-21	5.07965e-05	2.41402e-21	5.07965e-05	2.70328e-21	5.07965e-05	3.25995e-21
4.98686e-05	1.19293e-21	4.98686e-05	1.432e-21	4.98686e-05	1.60359e-21	4.98686e-05	1.9338e-21
4.89576e-05	7.05493e-22	4.89576e-05	8.46876e-22	4.89576e-05	9.48353e-22	4.89576e-05	1.14364e-21
4.80632e-05	4.15955e-22	4.80632e-05	4.99314e-22	4.80632e-05	5.59144e-22	4.80632e-05	6.74285e-22
4.71852e-05	2.44498e-22	4.71852e-05	2.93497e-22	4.71852e-05	3.28665e-22	4.71852e-05	3.96345e-22
4.63232e-05	1.43279e-22	4.63232e-05	1.71992e-22	4.63232e-05	1.92601e-22	4.63232e-05	2.32262e-22
4.5477e-05	8.37072e-23	4.5477e-05	1.00482e-22	4.5477e-05	1.12523e-22	4.5477e-05	1.35694e-22
4.46462e-05	4.87551e-23	4.46462e-05	5.85258e-23	4.46462e-05	6.55386e-23	4.46462e-05	7.90346e-23
4.38307e-05	2.83109e-23	4.38307e-05	3.39844e-23	4.38307e-05	3.80566e-23	4.38307e-05	4.58934e-23
4.303e-05	1.63894e-23	4.303e-05	1.96738e-23	4.303e-05	2.20312e-23	4.303e-05	2.6568e-23
4.22439e-05	9.45903e-24	4.22439e-05	1.13547e-23	4.22439e-05	1.27152e-23	4.22439e-05	1.53336e-23
4.14722e-05	5.44261e-24	4.14722e-05	6.53333e-24	4.14722e-05	7.31618e-24	4.14722e-05	8.82276e-24
4.07146e-05	3.12208e-24	4.07146e-05	3.74775e-24	4.07146e-05	4.19683e-24	4.07146e-05	5.06105e-24
3.99708e-05	1.78549e-24	3.99708e-05	2.1433e-24	3.99708e-05	2.40012e-24	3.99708e-05	2.89437e-24
3.92406e-05	1.01799e-24	3.92406e-05	1.222e-24	3.92406e-05	1.36843e-24	3.92406e-05	1.65022e-24
3.85238e-05	5.7864e-25	3.85238e-05	6.94602e-25	3.85238e-05	7.77832e-25	3.85238e-05	9.38007e-25
3.782e-05	3.27906e-25	3.782e-05	3.93619e-25	3.782e-05	4.40784e-25	3.782e-05	5.31552e-25
3.71291e-05	1.85253e-25	3.71291e-05	2.22378e-25	3.71291e-05	2.49024e-25	3.71291e-05	3.00305e-25
3.64509e-05	1.04341e-25	3.64509e-05	1.25252e-25	3.64509e-05	1.4026e-25	3.64509e-05	1.69143e-25
3.5785e-05	5.85901e-26	3.5785e-05	7.03317e-26	3.5785e-05	7.87592e-26	3.5785e-05	9.49776e-26
3.51313e-05	3.27995e-26	3.51313e-05	3.93727e-26	3.51313e-05	4.40905e-26	3.51313e-05	5.31698e-26
3.44895e-05	1.83057e-26	3.44895e-05	2.19743e-26	3.44895e-05	2.46073e-26	3.44895e-05	2.96746e-26
3.38595e-05	1.01855e-26	3.38595e-05	1.22267e-26	3.38595e-05	1.36918e-26	3.38595e-05	1.65112e-26
3.32409e-05	5.65007e-27	3.32409e-05	6.78236e-27	3.32409e-05	7.59505e-27	3.32409e-05	9.15906e-27
3.26337e-05	3.12464e-27	3.26337e-05	3.75083e-27	3.26337e-05	4.20028e-27	3.26337e-05	5.06521e-27
3.20375e-05	1.72275e-27	3.20375e-05	2.068e-27	3.20375e-05	2.3158e-27	3.20375e-05	2.79268e-27
3.14523e-05	9.4694e-28	3.14523e-05	1.13671e-27	3.14523e-05	1.27292e-27	3.14523e-05	1.53504e-27
3.08777e-05	5.18916e-28	3.08777e-05	6.22908e-28	3.08777e-05	6.97548e-28	3.08777e-05	8.4119e-28
3.03136e-05	2.83496e-28	3.03136e-05	3.4031e-28	3.03136e-05	3.81087e-28	3.03136e-05	4.59563e-28
2.97599e-05	1.54409e-28	2.97599e-05	1.85354e-28	2.97599e-05	2.07564e-28	2.97599e-05	2.50306e-28
2.92162e-05	8.38448e-29	2.92162e-05	1.00648e-28	2.92162e-05	1.12708e-28	2.92162e-05	1.35917e-28
2.86825e-05	4.53894e-29	2.86825e-05	5.44856e-29	2.86825e-05	6.10143e-29	2.86825e-05	7.35786e-29
2.81585e-05	2.44967e-29	2.81585e-05	2.9406e-29	2.81585e-05	3.29295e-29	2.81585e-05	3.97105e-29
2.76441e-05	1.31807e-29	2.76441e-05	1.58221e-29	2.76441e-05	1.7718e-29	2.76441e-05	2.13666e-29
2.71391e-05	7.0704e-30	2.71391e-05	8.48733e-30	2.71391e-05	9.50433e-30	2.71391e-05	1.14615e-29
2.66434e-05	3.78117e-30	2.66434e-05	4.53892e-30	2.66434e-05	5.0828e-30	2.66434e-05	6.12947e-30
2.61566e-05	2.01597e-30	2.61566e-05	2.41997e-30	2.61566e-05	2.70995e-30	2.61566e-05	3.26799e-30
2.56788e-05	1.07156e-30	2.56788e-05	1.2863e-30	2.56788e-05	1.44044e-30	2.56788e-05	1.73706e-30
2.52097e-05	5.6784e-31	2.52097e-05	6.81637e-31	2.52097e-05	7.63314e-31	2.52097e-05	9.20499e-31
2.47492e-05	2.99993e-31	2.47492e-05	3.60113e-31	2.47492e-05	4.03263e-31	2.47492e-05	4.86305e-31
2.42971e-05	1.58006e-31	2.42971e-05	1.8967e-31	2.42971e-05	2.12397e-31	2.42971e-05	2.56135e-31
2.38532e-05	8.29677e-32	2.38532e-05	9.95947e-32	2.38532e-05	1.11529e-31	2.38532e-05	1.34495e-31
2.34175e-05	4.34332e-32	2.34175e-05	5.21374e-32	2.34175e-05	5.83847e-32	2.34175e-05	7.04075e-32
2.29897e-05	2.26679e-32	2.29897e-05	2.72106e-32	2.29897e-05	3.04711e-32	2.29897e-05	3.67458e-32
2.25697e-05	1.17944e-32	2.25697e-05	1.4158e-32	2.25697e-05	1.58545e-32	2.25697e-05	1.91193e-32
2.21574e-05	6.11809e-33	2.21574e-05	7.34417e-33	2.21574e-05	8.22418e-33	2.21574e-05	9.91774e-33
2.17526e-05	3.16397e-33	2.17526e-05	3.79803e-33	2.17526e-05	4.25313e-33	2.17526e-05	5.12896e-33
2.13553e-05	1.63126e-33	2.13553e-05	1.95817e-33	2.13553e-05	2.19281e-33	2.13553e-05	2.64436e-33
2.09652e-05	8.38479e-34	2.09652e-05	1.00651e-33	2.09652e-05	1.12712e-33	2.09652e-05	1.35922e-33
2.05822e-05	4.29671e-34	2.05822e-05	5.15778e-34	2.05822e-05	5.77581e-34	2.05822e-05	6.96519e-34
2.02062e-05	2.19511e-34	2.02062e-05	2.63501e-34	2.02062e-05	2.95075e-34	2.02062e-05	3.55838e-34
1.9837e-05	1.11802e-34	1.9837e-05	1.34208e-34	1.9837e-05	1.50289e-34	1.9837e-05	1.81238e-34
1.94747e-05	5.67705e-35	1.94747e-05	6.81475e-35	1.94747e-05	7.63133e-35	1.94747e-05	9.2028e-35
1.91189e-05	2.87389e-35	1.91189e-05	3.44983e-35	1.91189e-05	3.8632e-35	1.91189e-05	4.65873e-35
1.87696e-05	1.45042e-35	1.87696e-05	1.74109e-35	1.87696e-05	1.94971e-35	1.87696e-05	2.35121e-35
1.84268e-05	7.29781e-36	1.84268e-05	8.76032e-36	1.84268e-05	9.81002e-36	1.84268e-05	1.18301e-35
1.80901e-05	3.66073e-36	1.80901e-05	4.39435e-36	1.80901e-05	4.92091e-36	1.80901e-05	5.93424e-36
1.77597e-05	1.83071e-36	1.77597e-05	2.19759e-36	1.77597e-05	2.46091e-36	1.77597e-05	2.96767e-36
1.74352e-05	9.12737e-37	1.74352e-05	1.09565e-36	1.74352e-05	1.22694e-36	1.74352e-05	1.47959e-36
1.71167e-05	4.53679e-37	1.71167e-05	5.44597e-37	1.71167e-05	6.09853e-37	1.71167e-05	7.35437e-37
1.68041e-05	2.24816e-37	1.68041e-05	2.6987e-37	1.68041e-05	3.02207e-37	1.68041e-05	3.64438e-37
1.64971e-05	1.11066e-37	1.64971e-05	1.33324e-37	1.64971e-05	1.493e-37	1.64971e-05	1.80044e-37
1.61957e-05	5.4703e-38	1.61957e-05	6.56657e-38	1.61957e-05	7.35341e-38	1.61957e-05	8.86765e-38
1.58999e-05	2.68607e-38	1.58999e-05	3.22437e-38	1.58999e-05	3.61073e-38	1.58999e-05	4.35426e-38
1.56094e-05	1.31492e-38	1.56094e-05	1.57844e-38	1.56094e-05	1.76757e-38	1.56094e-05	2.13156e-38
1.53242e-05	6.41738e-39	1.53242e-05	7.70344e-39	1.53242e-05	8.6265e-39	1.53242e-05	1.04029e-38
1.50443e-05	3.12242e-39	1.50443e-05	3.74816e-39	1.50443e-05	4.19729e-39	1.50443e-05	5.06161e-39
1.47695e-05	1.51461e-39	1.47695e-05	1.81814e-39	1.47695e-05	2.036e-39	1.47695e-05	2.45526e-39
1.44997e-05	7.32465e-40	1.44997e-05	8.79253e-40	1.44997e-05	9.84609e-40	1.44997e-05	1.18736e-39
1.42348e-05	3.53141e-40	1.42348e-05	4.23911e-40	1.42348e-05	4.74707e-40	1.42348e-05	5.7246e-40
1.39748e-05	1.6974e-40	1.39748e-05	2.03757e-40	1.39748e-05	2.28172e-40	1.39748e-05	2.75158e-40
1.37195e-05	8.13389e-41	1.37195e-05	9.76395e-41	1.37195e-05	1.09339e-40	1.37195e-05	1.31855e-40
1.34688e-05	3.88586e-41	1.34688e-05	4.6646e-41	1.34688e-05	5.22354e-41	1.34688e-05	6.29919e-41
1.32228e-05	1.85077e-41	1.32228e-05	2.22167e-41	1.32228e-05	2.48788e-41	1.32228e-05	3.0002e-41
1.29812e-05	8.78806e-42	1.29812e-05	1.05492e-41	1.29812e-05	1.18133e-41	1.29812e-05	1.42459e-41
1.27441e-05	4.16016e-42	1.27441e-05	4.99387e-42	1.27441e-05	5.59226e-42	1.27441e-05	6.74384e-42
1.25113e-05	1.96337e-42	1.25113e-05	2.35684e-42	1.25113e-05	2.63924e-42	1.25113e-05	3.18273e-42
1.22827e-05	9.23785e-43	1.22827e-05	1.10891e-42	1.22827e-05	1.24179e-42	1.22827e-05	1.4975e-42
1.20584e-05	4.33326e-43	1.20584e-05	5.20166e-43	1.20584e-05	5.82495e-43	1.20584e-05	7.02445e-43
1.18381e-05	2.02645e-43	1.18381e-05	2.43255e-43	1.18381e-05	2.72403e-43	1.18381e-05	3.28498e-43

## Sheet: Fig 2l
Distance (μm)	Counts of C	Counts of O	Counts of F	Counts of Si	Counts of P	Counts of S
0	900641	557429	562875	1361393	777174	573653
0.04	911779	587430	648875	1211217	861771	707963
0.081	1028778	573365	766949	1151376	965054	738087
0.121	888550	592376	773118	1165699	901049	694834
0.162	986689	599657	770938	1179191	888480	742231
0.202	947290	696595	846084	1156594	817828	747692
0.243	987843	641748	871701	1164671	924730	769895
0.283	922899	680766	884565	1132929	905423	928413
0.324	1000817	697495	966891	1139249	898596	807016
0.364	803750	719957	911076	1109647	917188	882061
0.405	926410	742020	919615	1085816	1112695	920976
0.445	949543	670654	1043990	1030236	977380	880040
0.486	745456	742210	1069142	1043565	884486	922298
0.526	887900	805712	1068933	978757	851847	947883
0.567	781450	827221	1278098	971000	980062	968414
0.607	684000	764540	1335725	918423	968311	1017912
0.648	522285	819130	1457615	898320	1015990	993481
0.688	575901	843633	1385606	898012	907414	1074058
0.729	850506	941072	1373565	899899	988969	1018437
0.769	805800	993339	1319204	860436	899788	912039
0.81	850714	1063021	1222357	803889	935457	1036830
0.85	860173	1069966	1122880	789706	751602	840097
0.891	692235	992087	1034597	778587	768962	1044831
0.931	513089	1026839	1072060	763323	811485	857833
0.972	476172	980160	950477	734901	836972	1004755
1.012	488320	1019982	924268	728254	836317	939458
1.053	589658	1142773	1000004	708121	935683	890809
1.093	535375	1232667	998383	721400	805799	1059978
1.134	441290	1266477	937464	706155	966769	1005403
1.174	381223	1229574	791189	701587	912365	965352
1.215	503264	1185309	892299	697503	900684	1048676
1.255	405692	1150858	814845	690024	1006845	1044568
1.296	457644	1307822	780508	651458	778203	977503
1.336	472055	1244069	777405	672605	991966	976847
1.377	389337	1255419	750728	663051	879632	976708
1.417	452439	1291400	776453	650779	903088	1118871
1.458	382891	1230146	768405	659139	1048721	973877
1.498	457944	1144687	714567	686445	893285	888360
1.539	419199	1227816	676683	666162	916326	1008868
1.579	333000	1187276	666584	639434	897837	1007376
1.62	402400	1128032	676223	646545	814871	1094237
1.66	332223	1042252	670130	664509	863669	941970
1.701	326966	1219382	675140	682619	1065811	1068140
1.741	371103	1254420	689149	701029	1025809	1096948
1.782	377273	1285799	716927	675475	796994	1121041
1.822	252381	1136649	663063	670866	1007973	1105892
1.863	444294	1173689	681107	677717	926860	1131499
1.903	384183	1285298	653745	687698	901990	1031257
1.944	392748	1260908	657393	698276	860963	990590
1.984	359108	1372444	698414	709248	879737	1012214
2.025	441322	1322588	636789	730047	819440	1054404
2.065	396680	1322492	578366	743989	680650	954921
2.106	393671	1381287	697183	767743	924110	1119561
2.146	389709	1379815	667215	791337	749628	1082655
2.187	447360	1379134	648348	776371	806032	1053184
2.227	455986	1359467	662689	772751	977209	1049707
2.268	478916	1290257	642652	764562	855577	1026067
2.308	362678	1327400	628050	770695	831099	1028743
2.349	438828	1273851	689450	794442	830295	937408
2.389	494600	1176709	627470	799715	1031518	1004022
2.43	483470	1177685	589132	821621	905283	1053408
2.47	376189	1276957	593018	844315	834430	999241
2.511	406699	1188117	577068	882636	824508	1056262
2.551	374963	1058556	568359	899452	979784	1087572
2.592	412600	1051956	614141	911529	851010	945825
2.632	258620	987582	587030	926118	829939	935358
2.672	318436	857046	513248	965556	781085	882043
2.713	311658	925706	485564	1007733	772714	896214
2.753	305951	818761	537101	1014915	735036	850391
2.794	332486	952729	488950	1030651	961829	851667
2.834	449842	971997	554635	1103081	954453	798348
2.875	393229	975006	584905	1134817	716404	714650
2.915	428071	1036317	527712	1195002	960663	789755
2.956	294007	918920	516267	1254086	927494	716869
2.996	375011	965706	520404	1309713	893816	746580
3.037	551625	869170	465215	1400549	785241	633876
3.077	536790	864994	449699	1494942	728836	682510
3.118	621375	828262	399997	1490767	663171	678233
3.158	620235	727379	387824	1541040	659951	603383
3.199	565885	707597	397640	1544498	839294	515892
3.239	627911	721660	299756	1559693	690330	440015
3.28	565579	733927	326782	1571486	650062	468274
3.32	610756	672457	347774	1599913	699811	574386
3.361	572571	658836	343406	1604803	630964	564672
3.401	642942	690769	300666	1590485	732531	508551
3.442	585311	688637	330427	1594712	641070	504680
3.482	657238	638712	314769	1617990	617381	581909
3.523	465446	683560	303788	1636500	722030	493407
3.563	597488	656367	323887	1628358	737468	387712
3.604	548758	622821	260557	1622222	543176	526181
3.644	528857	681832	282221	1631917	571730	557244
3.685	779337	642889	241225	1632969	607607	511273
3.725	564521	704869	279663	1654634	598121	478888
3.766	645491	627399	332550	1698220	599484	500038
3.806	561820	575167	247470	1738283	608463	493370
3.847	538990	656358	268931	1680164	588596	495491
3.887	503765	649525	240598	1698455	611594	460140
3.928	586357	646913	246311	1685347	744641	488080
3.968	646790	611302	228282	1711628	703531	450765
4.009	603683	581645	221099	1695289	658647	438773

## Sheet: Fig 2o
1		2		3		4		5		6		Si bulk		out
Raman Shift (cm-1)	Intensity	Raman Shift (cm-1)	Intensity	Raman Shift (cm-1)	Intensity	Raman Shift (cm-1)	Intensity	Raman Shift (cm-1)	Intensity	Raman Shift (cm-1)	Intensity	Raman Shift (cm-1)	Intensity	Raman Shift (cm-1)	Intensity
197.8	-152.407	197.8	118.507	197.8	307.748	197.8	614.637	197.8	907.121	197.8	1104.33	197.8	-336.606	197.8	1703.62
202.465	-165.778	202.465	101.608	202.465	278.197	202.465	599.358	202.465	936.921	202.465	1116.87	202.465	-383.07	202.465	1697.1
207.127	-168.894	207.127	87.115	207.127	275.902	207.127	586.312	207.127	897.22	207.127	1113.41	207.127	-302.046	207.127	1723.58
211.786	-167.793	211.786	88.718	211.786	259.952	211.786	588.249	211.786	914.017	211.786	1110.93	211.786	-318.535	211.786	1708.05
216.443	-170.93	216.443	107.222	216.443	303.985	216.443	605.92	216.443	914.815	216.443	1090.46	216.443	-363.535	216.443	1714.51
221.097	-145.693	221.097	89.4814	221.097	324.819	221.097	589.824	221.097	926.611	221.097	1119.97	221.097	-377.048	221.097	1707.96
225.749	-174.217	225.749	90.2523	225.749	299.273	225.749	590.961	225.749	924.906	225.749	1115.47	225.749	-326.073	225.749	1711.91
230.398	-159.872	230.398	89.4038	230.398	333.709	230.398	590.582	230.398	897.201	230.398	1113.47	230.398	-348.609	230.398	1719.34
235.044	-160.031	235.044	92.5727	235.044	314.946	235.044	593.938	235.044	918.494	235.044	1122.46	235.044	-330.658	235.044	1712.27
239.688	-158.994	239.688	111.838	239.688	316.622	239.688	612.277	239.688	901.787	239.688	1124.94	239.688	-360.719	239.688	1714.18
244.329	-170.045	244.329	78.7533	244.329	310.099	244.329	581.85	244.329	908.579	244.329	1111.42	244.329	-327.791	244.329	1705.09
248.968	-180.503	248.968	108.47	248.968	311.741	248.968	609.908	248.968	922.37	248.968	1092.89	248.968	-332.375	248.968	1701.49
253.604	-171.04	253.604	85.0311	253.604	322.913	253.604	588.451	253.604	911.661	253.604	1113.85	253.604	-327.971	253.604	1716.88
258.237	-156.756	258.237	113.925	258.237	317.704	258.237	615.728	258.237	916.451	258.237	1101.8	258.237	-343.078	258.237	1709.26
262.868	-139.461	262.868	97.7172	262.868	332.935	262.868	600.99	262.868	918.239	262.868	1100.25	262.868	-313.197	262.868	1710.64
267.496	-181.968	267.496	105.658	267.496	277.24	267.496	608.738	267.496	918.027	267.496	1107.68	267.496	-358.327	267.496	1696.51
272.122	-144.159	272.122	116.007	272.122	312.893	272.122	618.72	272.122	908.314	272.122	1100.12	272.122	-346.469	272.122	1713.37
276.745	-157.695	276.745	94.9427	276.745	326.712	276.745	599.438	276.745	914.101	276.745	1111.54	276.745	-343.622	276.745	1706.72
281.365	-168.221	281.365	99.6383	281.365	300.97	281.365	604.141	281.365	896.887	281.365	1104.96	281.365	-334.786	281.365	1698.57
285.983	-172.113	285.983	112.379	285.983	374.758	285.983	616.33	285.983	916.671	285.983	1092.86	285.983	-288.461	285.983	1716.91
290.598	-178.431	290.598	121.085	290.598	297.168	290.598	624.755	290.598	897.955	290.598	1097.77	290.598	-324.648	290.598	1716.74
295.211	-163.619	295.211	107.236	295.211	324.562	295.211	612.165	295.211	913.739	295.211	1113.16	295.211	-341.345	295.211	1720.06
299.821	-163.311	299.821	119.952	299.821	350.577	299.821	624.312	299.821	910.521	299.821	1106.05	299.821	-313.053	299.821	1710.88
304.429	-150.329	304.429	105.283	304.429	311.124	304.429	610.945	304.429	910.303	304.429	1097.43	304.429	-316.272	304.429	1698.19
309.034	-157.891	309.034	95.437	309.034	316.655	309.034	602.065	309.034	909.584	309.034	1127.8	309.034	-322.502	309.034	1705.5
313.636	-164.858	313.636	105.715	313.636	328.99	313.636	611.92	313.636	906.864	313.636	1095.67	313.636	-325.743	313.636	1703.29
318.236	-149.487	318.236	77.3332	318.236	319.492	318.236	585.763	318.236	905.144	318.236	1111.03	318.236	-295.995	318.236	1727.08
322.834	-158.887	322.834	109.338	322.834	368.616	322.834	615.843	322.834	896.422	322.834	1096.88	322.834	-297.757	322.834	1714.37
327.429	-173.127	327.429	116.373	327.429	349.545	327.429	622.659	327.429	884.7	327.429	1093.23	327.429	-308.529	327.429	1720.15
332.021	-177.713	332.021	109.711	332.021	338.64	332.021	616.713	332.021	895.477	332.021	1101.07	332.021	-292.312	332.021	1720.92
336.611	-162.377	336.611	114.315	336.611	304.54	336.611	621.253	336.611	899.754	336.611	1081.4	336.611	-279.106	336.611	1704.69
341.198	-137.99	341.198	120.523	341.198	312.699	341.198	627.281	341.198	908.03	341.198	1111.73	341.198	-286.91	341.198	1725.45
345.782	-164.947	345.782	99.3443	345.782	330.389	345.782	607.797	345.782	913.805	345.782	1131.55	345.782	-302.224	345.782	1699.71
350.365	-172.586	350.365	105.538	350.365	326.248	350.365	613.8	350.365	897.579	350.365	1105.86	350.365	-298.048	350.365	1699.46
354.944	-157.284	354.944	116.556	354.944	345.274	354.944	624.291	354.944	911.853	354.944	1108.17	354.944	-326.883	354.944	1712.2
359.521	-146.821	359.521	100.188	359.521	369.742	359.521	609.27	359.521	901.626	359.521	1081.47	359.521	-291.228	359.521	1709.44
364.096	-156.9	364.096	120.855	364.096	349.197	364.096	628.737	364.096	908.898	364.096	1112.76	364.096	-314.082	364.096	1707.68
368.668	-167.591	368.668	147.152	368.668	362.729	368.668	653.442	368.668	916.169	368.668	1090.55	368.668	-278.447	368.668	1721.41
373.237	-158.36	373.237	112.243	373.237	381.703	373.237	621.136	373.237	915.94	373.237	1108.83	373.237	-319.322	373.237	1714.63
377.804	-141.89	377.804	97.4589	377.804	354.3	377.804	607.568	377.804	881.21	377.804	1090.6	377.804	-295.706	377.804	1723.85
382.369	-138.713	382.369	116.489	382.369	345.975	382.369	625.488	382.369	912.479	382.369	1098.37	382.369	-263.1	382.369	1715.07
386.931	-153.06	386.931	128.265	386.931	322.638	386.931	636.647	386.931	887.748	386.931	1112.13	386.931	-335.504	386.931	1711.28
391.49	-169.225	391.49	120.708	391.49	377.014	391.49	629.795	391.49	903.516	391.49	1096.38	391.49	-284.918	391.49	1711.48
396.047	-140.706	396.047	141.328	396.047	341.379	396.047	649.182	396.047	905.783	396.047	1130.13	396.047	-288.341	396.047	1716.18
400.602	-138.768	400.602	127.317	400.602	360.276	400.602	636.308	400.602	910.05	400.602	1080.37	400.602	-266.274	400.602	1714.88
405.154	-142.273	405.154	122.962	405.154	376.434	405.154	632.424	405.154	915.316	405.154	1114.6	405.154	-298.216	405.154	1716.57
409.703	-153.033	409.703	111.353	409.703	374.853	409.703	621.778	409.703	912.081	409.703	1095.33	409.703	-298.668	409.703	1711.76
414.25	-128.167	414.25	147.249	414.25	405.986	414.25	655.372	414.25	898.846	414.25	1140.56	414.25	-284.129	414.25	1711.45
418.795	-132.902	418.795	109.86	418.795	371.653	418.795	620.705	418.795	910.11	418.795	1113.27	418.795	-304.099	418.795	1707.63
423.337	-139.456	423.337	130.443	423.337	417.763	423.337	640.029	423.337	912.873	423.337	1107.98	423.337	-250.578	423.337	1704.8
427.876	-121.859	427.876	133.304	427.876	373.861	427.876	642.841	427.876	931.636	427.876	1090.69	427.876	-231.567	427.876	1726.98
432.414	-110.308	432.414	145.823	432.414	402.22	432.414	654.644	432.414	914.898	432.414	1103.39	432.414	-257.565	432.414	1722.15
436.948	-125.338	436.948	145.451	436.948	373.294	436.948	654.437	436.948	924.159	436.948	1134.08	436.948	-265.572	436.948	1723.81
441.48	-110.781	441.48	161.984	441.48	409.812	441.48	669.97	441.48	923.92	441.48	1109.27	441.48	-221.088	441.48	1715.47
446.01	-128.845	446.01	168.043	446.01	416.318	446.01	675.743	446.01	924.68	446.01	1087.95	446.01	-262.112	446.01	1732.13
450.537	-142.083	450.537	156.381	450.537	379.177	450.537	665.007	450.537	914.94	450.537	1097.12	450.537	-246.146	450.537	1711.29
455.062	-117.28	455.062	139.881	455.062	370.661	455.062	649.761	455.062	911.198	455.062	1099.29	455.062	-266.188	455.062	1707.94
459.584	-148.046	459.584	135.454	459.584	439.861	459.584	645.756	459.584	912.457	459.584	1125.45	459.584	-224.74	459.584	1715.09
464.104	-112.384	464.104	127.801	464.104	465.413	464.104	638.741	464.104	900.714	464.104	1115.61	464.104	-237.3	464.104	1718.24
468.621	-125.649	468.621	146.716	468.621	387.319	468.621	656.467	468.621	923.971	468.621	1109.26	468.621	-215.368	468.621	1713.88
473.136	-128.049	473.136	154.351	473.136	404.668	473.136	663.685	473.136	900.727	473.136	1103.41	473.136	-253.445	473.136	1720.52
477.648	-140.119	477.648	143.46	477.648	348.37	477.648	653.643	477.648	904.483	477.648	1115.05	477.648	-293.031	477.648	1720.16
482.158	-145.552	482.158	97.938	482.158	379.334	482.158	611.342	482.158	906.238	482.158	1118.68	482.158	-296.625	482.158	1713.29
486.666	-161.861	486.666	104.752	486.666	388.47	486.666	617.783	486.666	897.493	486.666	1098.31	486.666	-288.228	486.666	1703.42
491.171	-169.722	491.171	72.1032	491.171	333.505	491.171	587.464	491.171	907.247	491.171	1107.93	491.171	-302.339	491.171	1725.05
495.674	-157.658	495.674	113.533	495.674	375.347	495.674	626.138	495.674	903	495.674	1110.55	495.674	-295.458	495.674	1712.18
500.174	-175.194	500.174	92.9522	500.174	343.542	500.174	607.053	500.174	891.753	500.174	1097.16	500.174	-312.585	500.174	1717.81
504.672	-163.747	504.672	91.6927	504.672	339.001	504.672	605.959	504.672	914.005	504.672	1110.77	504.672	-319.221	504.672	1702.43
509.167	-168.007	509.167	103.312	509.167	338.54	509.167	616.857	509.167	890.757	509.167	1116.87	509.167	-346.865	509.167	1716.05
513.66	-170.462	513.66	94.7953	513.66	342.16	513.66	608.998	513.66	894.008	513.66	1083.46	513.66	-328.017	513.66	1698.17
[truncated: 363 more rows]

## Sheet: Fig 3a
pristine		after formation		after 10 cycles		after 100 cycles		after 200 cycles		after 300 cycles
[truncated: 1,556 more rows]

[truncated: 9 more sheets: Fig 3b, Fig 3d, Fig 4i, Fig 4j, Fig 4k, Fig 4l, Fig 5g, Fig 5h, Fig 5i]
